# Supplementary material
Source: Research Square preprint supplement (doi:10.21203/rs.3.rs-9353987/v1)
Supplement: Supplementary file 1 [file 53c7c0bfbcbd779e214c78a6.docx]

**Supplementary information to:**

**Winter climate or species-specific traits? Controls on tundra winter nitrogen uptake along an Arctic climate gradient**

Laura Helene Rasmussen1,2 *, Louise Rütting3,4, Anders Michelsen5

1Department of Geoscience, University of Tromsø, Tromsø, Norway

2Department of Mathematical Sciences, University of Copenhagen, Copenhagen, Denmark

3Chair of Soil and Plant Systems, Brandenburg University of Technology Cottbus-Senftenberg, Cottbus, Germany

4Department of Earth Sciences, University of Gothenburg, Gothenburg, Sweden

5Department of Biology, University of Copenhagen, Copenhagen, Denmark

**Contents**

**Supplementary Tables S1-9**

**Supplementary Figures S1-13**

**Supplementary R code S1-3**

**Supplementary Tables: Winter N uptake**

Table S1: Air temperature and snow depth for the five locations Northern, Eastern, Southeastern, Southern and Western.

**Table S1: Mean monthly air temperatures (°C) and snow depth (mm) where available for the five meteorological stations closest to the mesocosm sampling sites from Early to Late winter (October-April). Data was retrieved from Danish Meteorological Institute (Jensen et al. 2024) as available in Rasmussen et al. (2025).**

|  | Northern | | Eastern | Southeastern | | | | Southern | | |
| --- | --- | --- | --- | --- | --- | --- | --- | --- | --- | --- |
|  | **Ittoqottoormiit** | | **Aputiteeq** | **Tasilaaq** | | | | **Anqissoq** | | |
| Month | **Air temperature (°C)** | | **Air temperature (°C)** | **Air temperature (°C)** | | **Snow depth (mm)** | | **Air temperature (°C)** | | |
| October | -5 ± 0.7 | | 0.08 ± 0.2 | 0.3 ± 0.1 | | 74 ± 8 | | 2.3 ± 0.02 | | |
| November | -9 ± 1 | | -3.1 ± 0.2 | -2.5 ± 0.1 | | 154 ± 7 | | 0.3 ± 0.02 | | |
| December | -12 ± 0.7 | | -7.0 ± 0.3 | -5.1 ± 0.1 | | 212 ± 7 | | -1.3 ± 0.03 | | |
| January | -11.5 ± 0.5 | | -8.1 ± 0.3 | -6.0 ± 0.2 | | 237 ± 11 | | -2.6 ± 0.03 | | |
| February | -11.3 ± 1.7 | | -7.0 ± 0.3 | -5.9 ± 0.2 | | 283 ± 18 | | -3.2 ± 0.03 | | |
| March | -14.5 ± 1.5 | | -8.9 ± 0.3 | -6.0 ± 0.1 | | 456 ± 34 | | -2.7 ± 0.03 | | |
| April | -8 ± 2.1 | | -4.4 ± 0.3 | -2.3 ± 0.1 | | 398 ± 66 | | -0.4 ± 0.02 | | |
| Station ID (DMI) | 4339 | | 4351 | 4360 | | | | 4285 | | |
| Date (M/DD) | | **9/1** | **9/8** | | **9/15** | | **9/22** | | **9/29** |
| Northern | | 15 | 14 | | 13 | | 12 | | 11 |
| Eastern | | 15 | 14 | | 13 | | 12 | | 11 |
| Southeastern | | 14 | 13.5 | | 12.5 | | 12 | | 11 |
| Southern | | 13.5 | 13 | | 12.5 | | 12 | | 11 |

**Table S3: 15N recovery (%) in the Northern ecosystem in % of added tracer**

| Winter_stage | Aboveground stem | Aboveground leaf | Microbial biomass | Fine roots | Coarse roots | | Soil water |
| --- | --- | --- | --- | --- | --- | --- | --- |
| Early_Winter | 3.70 ± 0.05 | 1.63 ± 0.01 | 12.22 ± 1.73 | 0.27 ± 0.09 | 0.21 ± 0.06 | 2.73 ± 0.90 | |
| Midwinter_I | 2.93 ± 0.03 | 1.05 ± 0.01 | 27.22 ± 9.21 | 0.08 ± 0.03 | 0.32 ± 0.14 | 10.17 ± 3.19 | |
| Midwinter_II | 3.16 ± 0.03 | 1.03 ± 0.01 | 12.44 ± 3.90 | 0.04 ± 0.01 | 0.17 ± 0.05 | 3.85 ± 1.51 | |
| Late_Winter_C | 3.37 ± 0.04 | 1.59 ± 0.01 | 5.97 ± 4.07 | 0.10 ± 0.03 | 0.73 ± 0.57 | 2.11 ± 0.56 | |
| Late_Winter_WW | 3.18 ± 0.03 | 0.92 ± 0.01 | 11.19 ± 1.72 | 0.06 ± 0.02 | 0.32 ± 0.15 | 0.92 ± 0.29 | |

**Table S4: 15N recovery (%) in the Eastern ecosystem in % of added tracer**

| Winter_stage | Aboveground stem | Aboveground leaf | Microbial biomass | Fine roots | Coarse roots | Soil water |
| --- | --- | --- | --- | --- | --- | --- |
| Early_Winter | 1.80 ± 0.02 | 1.27 ± 0.02 | 58.06 ± 16.05 | 0.69 ± 0.22 | 0.98 ± 0.20 | 5.32 ± 4.47 |
| Midwinter_I | 2.49 ± 0.03 | 1.34 ± 0.02 | 33.02 ± 16.99 | 0.42 ± 0.15 | 1.90 ± 0.63 | 5.65 ± 2.62 |
| Midwinter_II | 2.01 ± 0.03 | 1.33 ± 0.02 | 15.56 ± 3.06 | 0.36 ± 0.13 | 0.99 ± 0.38 | 3.36 ± 1.60 |
| Late_Winter_C | 1.69 ± 0.02 | 1.37 ± 0.02 | 11.66 ± 1.85 | 0.30 ± 0.17 | 1.90 ± 0.90 | 1.98 ± 1.26 |
| Late_Winter_WW | 2.07 ± 0.02 | 1.14 ± 0.01 | 13.40 ± 1.57 | 0.77 ± 0.48 | 0.63 ± 0.47 | 0.54 ± 0.23 |

**Table S5: 15N recovery (%) in the Southeastern ecosystem in % of added tracer**

| Winter_stage | Aboveground stem | | Aboveground leaf | Microbial biomass | Fine roots | Coarse roots | Soil water |
| --- | --- | --- | --- | --- | --- | --- | --- |
| Early_Winter | 3.36 ± 0.05 | 2.68 ± 0.03 | | 13.03 ± 3.42 | 0.16 ± 0.04 | 0.65 ± 0.41 | 3.57 ± 2.36 |
| Midwinter_I | 2.24 ± 0.03 | 2.08 ± 0.02 | | 21.38 ± 9.72 | 0.32 ± 0.07 | 6.09 ± 5.03 | 5.33 ± 2.03 |
| Midwinter_II | 2.53 ± 0.04 | 2.39 ± 0.03 | | 15.28 ± 1.03 | 0.17 ± 0.07 | 1.92 ± 0.98 | 1.89 ± 0.67 |
| Late_Winter_C | 1.99 ± 0.05 | 2.54 ± 0.03 | | 6.20 ± 4.97 | 0.28 ± 0.19 | 4.19 ± 3.71 | 1.94 ± 1.02 |
| Late_Winter_WW | 3.09 ± 0.05 | 2.37 ± 0.03 | | 4.66 ± 1.52 | 0.55 ± 0.45 | 1.14 ± 0.89 | 2.64 ± 1.47 |

**Table S6: 15N recovery (%) in the Southern ecosystem in % of added tracer**

| Winter_stage | Aboveground stem | Aboveground leaf | Microbial biomass | Fine roots | Coarse roots | Soil water |
| --- | --- | --- | --- | --- | --- | --- |
| Early_Winter | 5.79 ± 0.17 | 2.07 ± 0.02 | 28.93 ± 5.93 | 0.05 ± 0.02 | 0.82 ± 0.41 | 1.90 ± 1.46 |
| Midwinter_I | 1.92 ± 0.03 | 1.56 ± 0.01 | 44.62 ± 14.41 | 0.06 ± 0.02 | 1.50 ± 0.49 | 2.40 ± 0.74 |
| Midwinter_II | 6.02 ± 0.19 | 1.94 ± 0.02 | 17.75 ± 4.11 | 0.05 ± 0.03 | 0.61 ± 0.23 | 0.75 ± 0.54 |
| Late_Winter_C | 5.44 ± 0.15 | 1.58 ± 0.02 | 8.28 ± 1.58 | 0.01±0.005 | 0.82 ± 0.27 | 0.79 ± 0.45 |
| Late_Winter_WW | 4.95 ± 0.13 | 2.11 ± 0.02 | 4.92 ± 3.12 | 0.06 ± 0.03 | 0.49 ± 0.32 | 0.17 ± 0.09 |

**Table S7: Microbial C, N and C/N ratios of microbes pr g dry soil**

| Site | Early Winter | | Midwinter_I | Midwinter_II | Late_Winter_C | Late_Winter_WW |
| --- | --- | --- | --- | --- | --- | --- |
| µg C/g dry soil | | |  |  |  |  |
| Northern | 787.60 ± 229 | | 1325.53 ± 328 | 1264.80 ± 565 | 195.43 ± 186 | 113.92 ± 42 |
| Eastern | 1703.26 ± 689 | | 1643.31 ± 873 | 496.07 ± 126 | 110.40 ± 31 | 340.30 ± 20 |
| Southeastern | 638.99 ± 180 | | 937.29 ± 477 | 987.08 ± 215 | 111.17 ± 93 | 353.92 ± 78 |
| Southern | 478.46 ± 153 | | 2428.10 ± 997 | 622.67 ± 176 | 153.58 ± 40 | 132.88 ± nan |
| µg N/g dry soil | | |  |  |  |  |
| Northern | 92.96 ± 30 | | 148.50 ± 35 | 111.86 ± 48 | 41.00 ± 37 | 10.02 ± 4 |
| Eastern | 117.89 ± 57 | | 132.28 ± 73 | 37.95 ± 11 | 8.53 ± 2 | 14.58 ± 4 |
| Southeastern | 41.36 ± 11 | | 91.06 ± 50 | 115.19 ± 26 | 18.52 ± nan | 40.07 ± 9 |
| Southern | 25.11 ± 4 | | 107.78 ± 43 | 47.82 ± 14 | 14.93 ± 5 | 3.78 ± 3 |
| C/N ratio of microbes | |  |  |  |  |  |
| Northern | 10.41 ± 1 | | 8.86 ± 1 | 6.82 ± 1 | 3.20 ± 1 | 10.96 ± 2 |
| Eastern | 14.32 ± 1 | | 12.39 ± 2 | 11.04 ± 1 | 13.34 ± 2 | 9.89 ± 0.4 |
| Southeastern | 14.54 ± 2 | | 9.26 ± 2 | 9.25 ± 2 | 11.03 ± nan | 8.85 ± 0.5 |
| Southern | 15.21 ± 1 | | 17.39 ± 2 | 13.11 ± 1 | 12.46 ± 3 | 13.84 ± nan |

**Table S8: Species-specific differences of mg 15N excess pr g dry weight biomass as calculated using the estimated marginal means with pairwise comparison between species (Tukey adjusted). Results are calculated for leaf biomass and stem biomass respectively.**

| contrast species | Estimate of difference (mg 15Nexcess/g dry weight biomass) | SE | df | t.ratio | p.value |
| --- | --- | --- | --- | --- | --- |

| **Stem_leaf = Leaf:** | | | | |  |
| --- | --- | --- | --- | --- | --- |
| **contrast** |  |  |  |  |  |
| Salix arctica - Betula | 0.106072 | 0.016916 | 853 | 6.27 | <.0001 |
| Salix arctica - Cassiope | 0.113804 | 0.014158 | 853 | 8.038 | <.0001 |
| Salix arctica - Dryas | 0.151453 | 0.023042 | 853 | 6.573 | <.0001 |
| Salix arctica - Empetrum | 0.158431 | 0.010673 | 853 | 14.844 | <.0001 |
| Salix arctica - Grass | 0.108667 | 0.010619 | 853 | 10.233 | <.0001 |
| Salix arctica - Lichen | 0.280387 | 0.013904 | 853 | 20.166 | <.0001 |
| Salix arctica - Moss | 0.232478 | 0.010412 | 853 | 22.329 | <.0001 |
| Salix arctica - Pileurt | 0.149993 | 0.01487 | 853 | 10.087 | <.0001 |
| Salix arctica - Salix herbacea | 0.089602 | 0.022635 | 853 | 3.959 | 0.0039 |
| Salix arctica - Vaccinum | 0.17546 | 0.010642 | 853 | 16.488 | <.0001 |
| Betula - Cassiope | 0.007732 | 0.01882 | 853 | 0.411 | 1 |
| Betula - Dryas | 0.045381 | 0.026169 | 853 | 1.734 | 0.8176 |
| Betula - Empetrum | 0.05236 | 0.016551 | 853 | 3.164 | 0.0605 |
| Betula - Grass | 0.002595 | 0.016731 | 853 | 0.155 | 1 |
| Betula - Lichen | 0.174315 | 0.018469 | 853 | 9.438 | <.0001 |
| Betula - Moss | 0.126407 | 0.016347 | 853 | 7.732 | <.0001 |
| Betula - Pileurt | 0.043921 | 0.019361 | 853 | 2.268 | 0.4567 |
| Betula - Salix herbacea | -0.01647 | 0.025934 | 853 | -0.635 | 0.9999 |
| Betula - Vaccinum | 0.069388 | 0.016582 | 853 | 4.185 | 0.0016 |
| Cassiope - Dryas | 0.037649 | 0.024069 | 853 | 1.564 | 0.8968 |
| Cassiope - Empetrum | 0.044627 | 0.014322 | 853 | 3.116 | 0.0694 |
| Cassiope - Grass | -0.00514 | 0.014056 | 853 | -0.365 | 1 |
| Cassiope - Lichen | 0.166583 | 0.016479 | 853 | 10.109 | <.0001 |
| Cassiope - Moss | 0.118674 | 0.013471 | 853 | 8.809 | <.0001 |
| Cassiope - Pileurt | 0.036189 | 0.016393 | 853 | 2.208 | 0.4999 |
| Cassiope - Salix herbace | a -0.02420251 | 0.024563 | 853 | -0.985 | 0.9962 |
| Cassiope - Vaccinum | 0.061656 | 0.013683 | 853 | 4.506 | 0.0004 |
| Dryas - Empetrum | 0.006978 | 0.023133 | 853 | 0.302 | 1 |
| Dryas - Grass | -0.04279 | 0.022945 | 853 | -1.865 | 0.7402 |
| Dryas - Lichen | 0.128934 | 0.024491 | 853 | 5.264 | <.0001 |
| Dryas - Moss | 0.081025 | 0.022628 | 853 | 3.581 | 0.0159 |
| Dryas - Pileurt | -0.00146 | 0.024495 | 853 | -0.06 | 1 |
| Dryas - Salix herbacea | -0.06185 | 0.030551 | 853 | -2.025 | 0.6317 |
| Dryas - Vaccinum | 0.024007 | 0.022755 | 853 | 1.055 | 0.9935 |
| Empetrum - Grass | -0.04976 | 0.009943 | 853 | -5.005 | <.0001 |
| Empetrum - Lichen | 0.121955 | 0.0132 | 853 | 9.239 | <.0001 |
| Empetrum - Moss | 0.074047 | 0.009936 | 853 | 7.452 | <.0001 |
| Empetrum - Pileurt | -0.00844 | 0.015026 | 853 | -0.562 | 1 |
| Empetrum - Salix herbace | a -0.06882988 | 0.022134 | 853 | -3.11 | 0.0707 |
| Empetrum - Vaccinum | 0.017029 | 0.010206 | 853 | 1.669 | 0.8513 |
| Grass - Lichen | 0.17172 | 0.01359 | 853 | 12.636 | <.0001 |
| Grass - Moss | 0.123811 | 0.009919 | 853 | 12.482 | <.0001 |
| Grass - Pileurt | 0.041326 | 0.014773 | 853 | 2.797 | 0.1607 |
| Grass - Salix herbacea | -0.01907 | 0.0223 | 853 | -0.855 | 0.9989 |
| Grass - Vaccinum | 0.066793 | 0.010118 | 853 | 6.601 | <.0001 |
| Lichen - Moss | -0.04791 | 0.013246 | 853 | -3.617 | 0.014 |
| Lichen - Pileurt | -0.13039 | 0.017094 | 853 | -7.628 | <.0001 |
| Lichen - Salix herbacea | -0.19079 | 0.023864 | 853 | -7.995 | <.0001 |
| Lichen - Vaccinum | -0.10493 | 0.01353 | 853 | -7.755 | <.0001 |
| Moss - Pileurt | -0.08249 | 0.014218 | 853 | -5.802 | <.0001 |
| Moss - Salix herbacea | -0.14288 | 0.022305 | 853 | -6.406 | <.0001 |
| Moss - Vaccinum | -0.05702 | 0.009868 | 853 | -5.778 | <.0001 |
| Pileurt - Salix herbacea | -0.06039 | 0.02498 | 853 | -2.418 | 0.3564 |
| Pileurt - Vaccinum | 0.025467 | 0.014418 | 853 | 1.766 | 0.7997 |
| Salix herbacea - Vaccinum | 0.0858586 | 0.022417 | 853 | 3.83 | 0.0064 |

| **Stem_leaf = Stem:** | | | | |  |
| --- | --- | --- | --- | --- | --- |
| **contrast** | estimate | SE | df | t.ratio | p.value |
| Salix arctica - Betula | -0.02453 | 0.017459 | 853 | -1.405 | 0.6248 |
| Salix arctica - Cassiope | 0.054565 | 0.013962 | 853 | 3.908 | 0.001 |
| Salix arctica - Dryas | nonEst | NA | NA | NA | NA |
| Salix arctica - Empetrum | 0.109757 | 0.010131 | 853 | 10.834 | <.0001 |
| Salix arctica - Vaccinum | 0.023463 | 0.010424 | 853 | 2.251 | 0.1622 |
| Betula - Cassiope | 0.079091 | 0.019409 | 853 | 4.075 | 0.0005 |
| Betula - Empetrum | 0.134283 | 0.017275 | 853 | 7.773 | <.0001 |
| Betula - Vaccinum | 0.047989 | 0.01737 | 853 | 2.763 | 0.0462 |
| Cassiope - Empetrum | 0.055192 | 0.014228 | 853 | 3.879 | 0.0011 |
| Cassiope - Vaccinum | -0.0311 | 0.013749 | 853 | -2.262 | 0.1583 |

**Table S9: Atomic percentage excess of 15N (tracer N excess per unit N) for each site, winter stage and species.**

| **Site** | **Winter_stage** | **Species** | **Stem_leaf** | **15NAPE%** |
| --- | --- | --- | --- | --- |
| North | Early_Winter | Betula | Leaf | 0.018403 |
| North | Early_Winter | Betula | Stem | 0.020193 |
| North | Early_Winter | Cassiope | Leaf | 0.022466 |
| North | Early_Winter | Cassiope | Stem | 0.021486 |
| North | Early_Winter | Dryas | Leaf | 0.015949 |
| North | Early_Winter | Grass | Leaf | 0.015569 |
| North | Early_Winter | Lichen | Leaf | 0.012669 |
| North | Early_Winter | Bryophytes | Leaf | 0.015188 |
| North | Early_Winter | Pileurt | Leaf | 0.017499 |
| North | Early_Winter | Salix | Leaf | 0.017168 |
| North | Early_Winter | Salix | Stem | 0.018613 |
| North | Early_Winter | Vaccinum | Leaf | 0.019667 |
| North | Early_Winter | Vaccinum | Stem | 0.019861 |
| North | Late_Winter_C | Betula | Leaf | 0.015724 |
| North | Late_Winter_C | Betula | Stem | 0.018479 |
| North | Late_Winter_C | Cassiope | Leaf | 0.022348 |
| North | Late_Winter_C | Cassiope | Stem | 0.021139 |
| North | Late_Winter_C | Dryas | Leaf | 0.017274 |
| North | Late_Winter_C | Grass | Leaf | 0.015667 |
| North | Late_Winter_C | Bryophytes | Leaf | 0.011547 |
| North | Late_Winter_C | Pileurt | Leaf | 0.016599 |
| North | Late_Winter_C | Salix | Leaf | 0.017226 |
| North | Late_Winter_C | Salix | Stem | 0.018482 |
| North | Late_Winter_C | Vaccinum | Leaf | 0.016759 |
| North | Late_Winter_C | Vaccinum | Stem | 0.0217 |
| North | Late_Winter_WW | Betula | Leaf | 0.015823 |
| North | Late_Winter_WW | Betula | Stem | 0.020464 |
| North | Late_Winter_WW | Cassiope | Leaf | 0.021515 |
| North | Late_Winter_WW | Cassiope | Stem | 0.020908 |
| North | Late_Winter_WW | Grass | Leaf |  |
| North | Late_Winter_WW | Bryophytes | Leaf | 0.014646 |
| North | Late_Winter_WW | Pileurt | Leaf | 0.016722 |
| North | Late_Winter_WW | Salix | Leaf | 0.019886 |
| North | Late_Winter_WW | Salix | Stem | 0.01768 |
| North | Late_Winter_WW | Vaccinum | Leaf | 0.016311 |
| North | Late_Winter_WW | Vaccinum | Stem | 0.0231 |
| North | Midwinter_I | Betula | Leaf | 0.016552 |
| North | Midwinter_I | Betula | Stem | 0.020709 |
| North | Midwinter_I | Cassiope | Leaf | 0.021918 |
| North | Midwinter_I | Cassiope | Stem | 0.021711 |
| North | Midwinter_I | Grass | Leaf | 0.013988 |
| North | Midwinter_I | Lichen | Leaf | 0.014629 |
| North | Midwinter_I | Bryophytes | Leaf | 0.014541 |
| North | Midwinter_I | Pileurt | Leaf | 0.017869 |
| North | Midwinter_I | Salix | Leaf | 0.016588 |
| North | Midwinter_I | Salix | Stem | 0.018245 |
| North | Midwinter_I | Vaccinum | Leaf | 0.018123 |
| North | Midwinter_I | Vaccinum | Stem | 0.02067 |
| North | Midwinter_II | Betula | Leaf | 0.014641 |
| North | Midwinter_II | Betula | Stem | 0.016272 |
| North | Midwinter_II | Cassiope | Leaf | 0.020692 |
| North | Midwinter_II | Cassiope | Stem | 0.021411 |
| North | Midwinter_II | Grass | Leaf | 0.014029 |
| North | Midwinter_II | Bryophytes | Leaf | 0.014031 |
| North | Midwinter_II | Pileurt | Leaf | 0.018031 |
| North | Midwinter_II | Salix | Leaf | 0.015624 |
| North | Midwinter_II | Salix | Stem | 0.016741 |
| North | Midwinter_II | Vaccinum | Leaf | 0.017872 |
| North | Midwinter_II | Vaccinum | Stem | 0.021471 |
| East | Early_Winter | Empetrum | Leaf | 0.022198 |
| East | Early_Winter | Empetrum | Stem | 0.022047 |
| East | Early_Winter | Grass | Leaf | 0.015324 |
| East | Early_Winter | Lichen | Leaf | 0.008039 |
| East | Early_Winter | Bryophytes | Leaf | 0.01026 |
| East | Early_Winter | Salix | Leaf | 0.018088 |
| East | Early_Winter | Salix | Stem | 0.019995 |
| East | Early_Winter | Vaccinum | Leaf | 0.01904 |
| East | Early_Winter | Vaccinum | Stem | 0.020619 |
| East | Late_Winter_C | Empetrum | Leaf | 0.020734 |
| East | Late_Winter_C | Empetrum | Stem | 0.02118 |
| East | Late_Winter_C | Grass | Leaf | 0.015154 |
| East | Late_Winter_C | Bryophytes | Leaf | 0.011711 |
| East | Late_Winter_C | Salix | Leaf | 0.019243 |
| East | Late_Winter_C | Salix | Stem | 0.01651 |
| East | Late_Winter_C | Vaccinum | Leaf | 0.018129 |
| East | Late_Winter_C | Vaccinum | Stem | 0.01934 |
| East | Late_Winter_WW | Empetrum | Leaf | 0.02061 |
| East | Late_Winter_WW | Empetrum | Stem | 0.021246 |
| East | Late_Winter_WW | Grass | Leaf | 0.015783 |
| East | Late_Winter_WW | Bryophytes | Leaf | 0.013341 |
| East | Late_Winter_WW | Salix | Leaf | 0.016665 |
| East | Late_Winter_WW | Salix | Stem | 0.01753 |
| East | Late_Winter_WW | Salix herbacea | Leaf | 0.016583 |
| East | Late_Winter_WW | Vaccinum | Leaf | 0.016954 |
| East | Late_Winter_WW | Vaccinum | Stem | 0.020908 |
| East | Midwinter_I | Empetrum | Leaf | 0.020944 |
| East | Midwinter_I | Empetrum | Stem | 0.020884 |
| East | Midwinter_I | Grass | Leaf | 0.015003 |
| East | Midwinter_I | Bryophytes | Leaf | 0.009105 |
| East | Midwinter_I | Salix | Leaf | 0.017023 |
| East | Midwinter_I | Salix | Stem | 0.017881 |
| East | Midwinter_I | Vaccinum | Leaf | 0.018197 |
| East | Midwinter_I | Vaccinum | Stem | 0.019666 |
| East | Midwinter_II | Empetrum | Leaf | 0.020749 |
| East | Midwinter_II | Empetrum | Stem | 0.020463 |
| East | Midwinter_II | Grass | Leaf | 0.015174 |
| East | Midwinter_II | Bryophytes | Leaf | 0.01451 |
| East | Midwinter_II | Salix | Leaf | 0.015035 |
| East | Midwinter_II | Salix | Stem | 0.017772 |
| East | Midwinter_II | Vaccinum | Leaf | 0.019235 |
| East | Midwinter_II | Vaccinum | Stem | 0.020901 |
| Southeast | Early_Winter | Empetrum | Leaf | 0.022073 |
| Southeast | Early_Winter | Empetrum | Stem | 0.021884 |
| Southeast | Early_Winter | Grass | Leaf | 0.015742 |
| Southeast | Early_Winter | Lichen | Leaf | 0.015534 |
| Southeast | Early_Winter | Bryophytes | Leaf | 0.005735 |
| Southeast | Early_Winter | Salix | Leaf | 0.017783 |
| Southeast | Early_Winter | Salix | Stem | 0.019121 |
| Southeast | Early_Winter | Salix herbacea | Leaf | 0.019014 |
| Southeast | Early_Winter | Vaccinum | Leaf | 0.019373 |
| Southeast | Early_Winter | Vaccinum | Stem | 0.019897 |
| Southeast | Late_Winter_C | Empetrum | Leaf | 0.020524 |
| Southeast | Late_Winter_C | Empetrum | Stem | 0.021613 |
| Southeast | Late_Winter_C | Grass | Leaf | 0.017059 |
| Southeast | Late_Winter_C | Bryophytes | Leaf | 0.017629 |
| Southeast | Late_Winter_C | Salix | Leaf | 0.019013 |
| Southeast | Late_Winter_C | Salix | Stem | 0.017044 |
| Southeast | Late_Winter_C | Vaccinum | Leaf | 0.016691 |
| Southeast | Late_Winter_C | Vaccinum | Stem |  |
| Southeast | Late_Winter_WW | Empetrum | Leaf | 0.020922 |
| Southeast | Late_Winter_WW | Empetrum | Stem | 0.020013 |
| Southeast | Late_Winter_WW | Grass | Leaf | 0.014068 |
| Southeast | Late_Winter_WW | Bryophytes | Leaf | 0.010926 |
| Southeast | Late_Winter_WW | Salix | Leaf | 0.015888 |
| Southeast | Late_Winter_WW | Salix | Stem | 0.0164 |
| Southeast | Late_Winter_WW | Vaccinum | Leaf | 0.016213 |
| Southeast | Late_Winter_WW | Vaccinum | Stem | 0.021576 |
| Southeast | Midwinter_I | Empetrum | Leaf | 0.020055 |
| Southeast | Midwinter_I | Empetrum | Stem | 0.020337 |
| Southeast | Midwinter_I | Grass | Leaf | 0.016386 |
| Southeast | Midwinter_I | Bryophytes | Leaf | 0.012828 |
| Southeast | Midwinter_I | Salix | Leaf | 0.01752 |
| Southeast | Midwinter_I | Salix | Stem | 0.018155 |
| Southeast | Midwinter_I | Salix herbacea | Leaf | 0.016818 |
| Southeast | Midwinter_I | Vaccinum | Leaf | 0.017849 |
| Southeast | Midwinter_I | Vaccinum | Stem | 0.016106 |
| Southeast | Midwinter_II | Empetrum | Leaf | 0.021814 |
| Southeast | Midwinter_II | Empetrum | Stem | 0.020971 |
| Southeast | Midwinter_II | Grass | Leaf | 0.014537 |
| Southeast | Midwinter_II | Bryophytes | Leaf | 0.010437 |
| Southeast | Midwinter_II | Salix | Leaf | 0.015892 |
| Southeast | Midwinter_II | Salix | Stem | 0.015182 |
| Southeast | Midwinter_II | Vaccinum | Leaf | 0.019082 |
| Southeast | Midwinter_II | Vaccinum | Stem | 0.019786 |
| South | Early_Winter | Betula | Leaf | 0.016438 |
| South | Early_Winter | Betula | Stem | 0.021851 |
| South | Early_Winter | Empetrum | Leaf | 0.022331 |
| South | Early_Winter | Empetrum | Stem | 0.022056 |
| South | Early_Winter | Grass | Leaf | 0.015502 |
| South | Early_Winter | Lichen | Leaf | 0.015416 |
| South | Early_Winter | Bryophytes | Leaf | 0.015812 |
| South | Early_Winter | Salix | Leaf | 0.018191 |
| South | Early_Winter | Salix | Stem | 0.018973 |
| South | Early_Winter | Salix herbacea | Leaf | 0.019698 |
| South | Early_Winter | Vaccinum | Leaf | 0.018972 |
| South | Early_Winter | Vaccinum | Stem | 0.019301 |
| South | Late_Winter_C | Betula | Leaf | 0.021861 |
| South | Late_Winter_C | Betula | Stem | 0.020179 |
| South | Late_Winter_C | Empetrum | Leaf | 0.020023 |
| South | Late_Winter_C | Empetrum | Stem | 0.020527 |
| South | Late_Winter_C | Lichen | Leaf | 0.014473 |
| South | Late_Winter_C | Bryophytes | Leaf |  |
| South | Late_Winter_C | Salix | Leaf | 0.017629 |
| South | Late_Winter_C | Salix | Stem | 0.018279 |
| South | Late_Winter_C | Salix herbacea | Leaf | 0.015272 |
| South | Late_Winter_C | Vaccinum | Leaf | 0.016198 |
| South | Late_Winter_C | Vaccinum | Stem | 0.020694 |
| South | Late_Winter_WW | Betula | Leaf | 0.014747 |
| South | Late_Winter_WW | Betula | Stem | 0.019341 |
| South | Late_Winter_WW | Empetrum | Leaf | 0.020133 |
| South | Late_Winter_WW | Empetrum | Stem | 0.020111 |
| South | Late_Winter_WW | Grass | Leaf | 0.015334 |
| South | Late_Winter_WW | Bryophytes | Leaf | 0.016349 |
| South | Late_Winter_WW | Salix | Leaf | 0.01632 |
| South | Late_Winter_WW | Salix | Stem | 0.01851 |
| South | Late_Winter_WW | Salix herbacea | Leaf |  |
| South | Late_Winter_WW | Vaccinum | Leaf | 0.016868 |
| South | Late_Winter_WW | Vaccinum | Stem | 0.021256 |
| South | Midwinter_I | Betula | Leaf | 0.015079 |
| South | Midwinter_I | Betula | Stem |  |
| South | Midwinter_I | Empetrum | Leaf | 0.02072 |
| South | Midwinter_I | Empetrum | Stem | 0.019798 |
| South | Midwinter_I | Grass | Leaf | 0.015856 |
| South | Midwinter_I | Lichen | Leaf | 0.014514 |
| South | Midwinter_I | Bryophytes | Leaf | 0.014886 |
| South | Midwinter_I | Salix | Leaf | 0.016551 |
| South | Midwinter_I | Salix | Stem | 0.01825 |
| South | Midwinter_I | Salix herbacea | Leaf | 0.017813 |
| South | Midwinter_I | Vaccinum | Leaf | 0.01897 |
| South | Midwinter_I | Vaccinum | Stem | 0.020671 |
| South | Midwinter_II | Betula | Leaf | 0.0152 |
| South | Midwinter_II | Betula | Stem | 0.021651 |
| South | Midwinter_II | Empetrum | Leaf | 0.019824 |
| South | Midwinter_II | Empetrum | Stem | 0.022016 |
| South | Midwinter_II | Grass | Leaf | 0.015498 |
| South | Midwinter_II | Lichen | Leaf | 0.015003 |
| South | Midwinter_II | Bryophytes | Leaf | 0.0143 |
| South | Midwinter_II | Salix | Leaf | 0.015658 |
| South | Midwinter_II | Salix | Stem | 0.019343 |
| South | Midwinter_II | Salix herbacea | Leaf | 0.017522 |
| South | Midwinter_II | Vaccinum | Leaf | 0.016968 |
| South | Midwinter_II | Vaccinum | Stem | 0.01847 |

**Supplementary Figures**

**Figure S1: conceptual representation of recovery calculations**


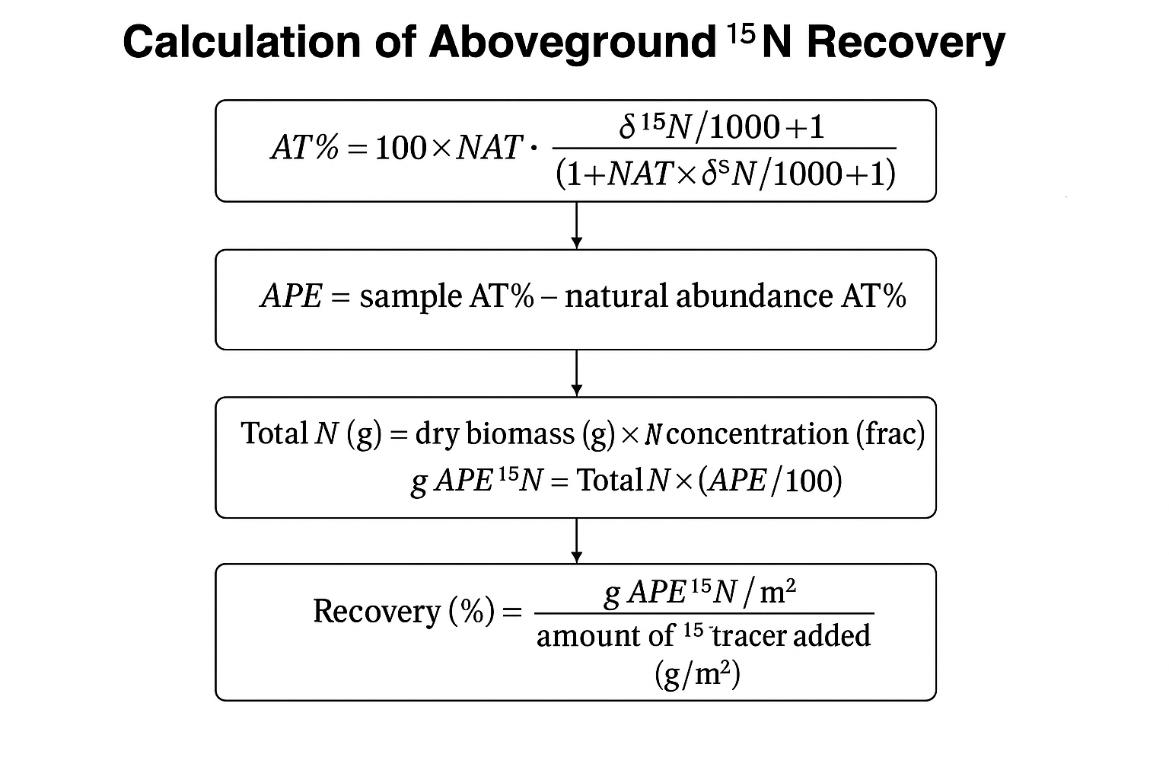


**Figure S2: Root recovery of tracer N**


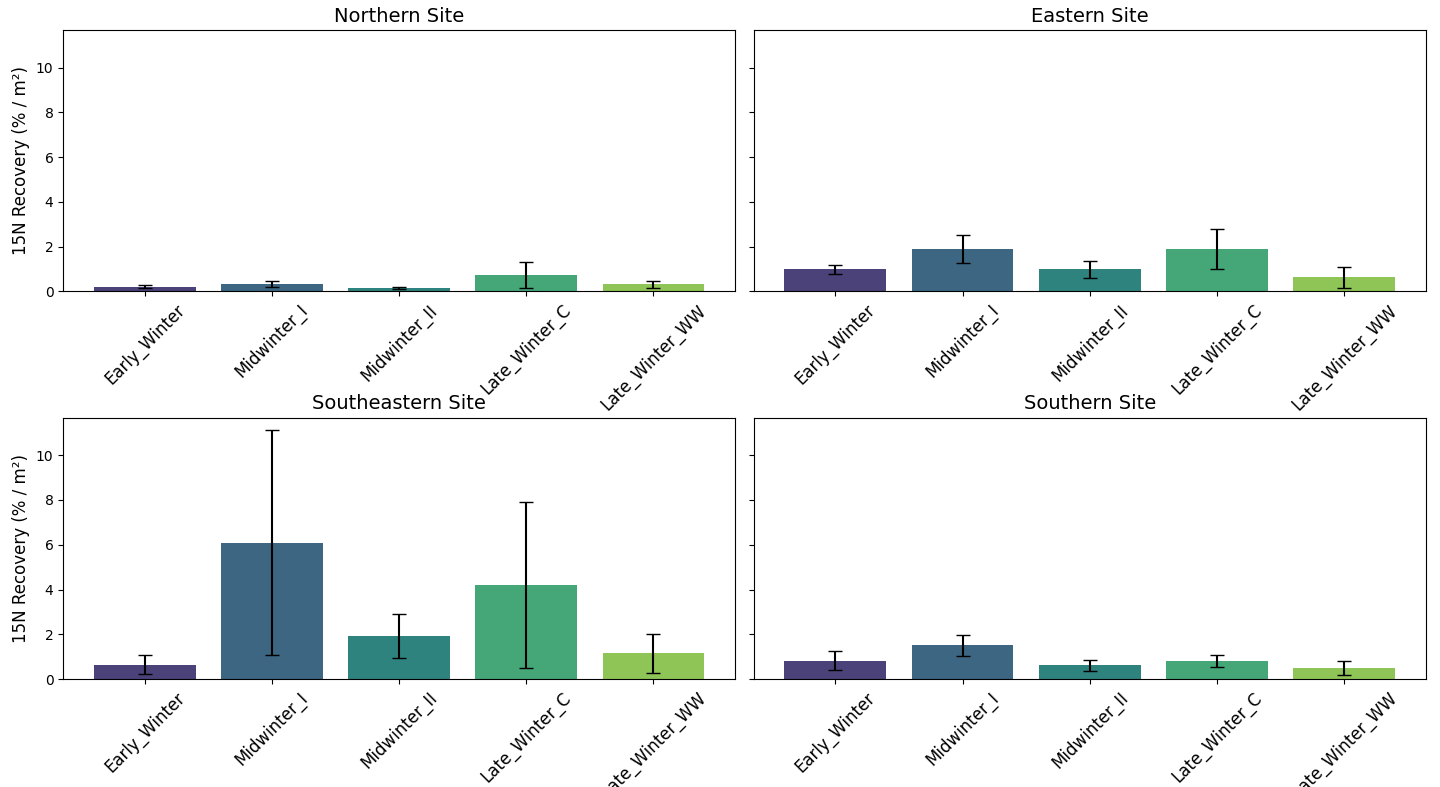


Coarse > 1mm

Coarse > 1mm

Coarse > 1mm

Coarse > 1mm


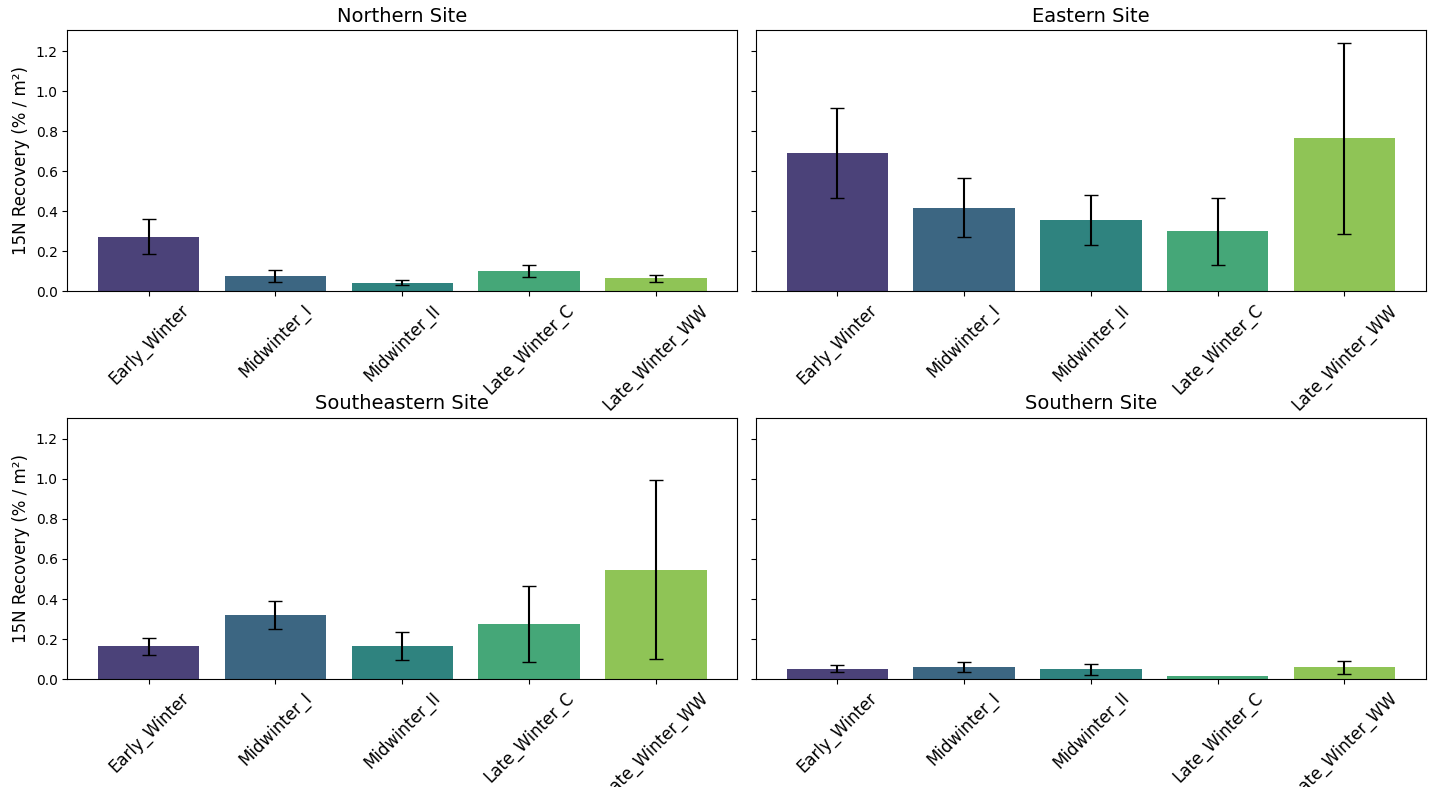


Fine < 1mm

Fine < 1mm

Fine < 1mm

Fine < 1mm

**Figure S2: 15N recovery (%) of tracer N injection in roots: Coarse roots >1 mm (lower), Fine roots (Upper). A: Northern site, B: Eastern site, C: Southeastern site and D: Southern site.**


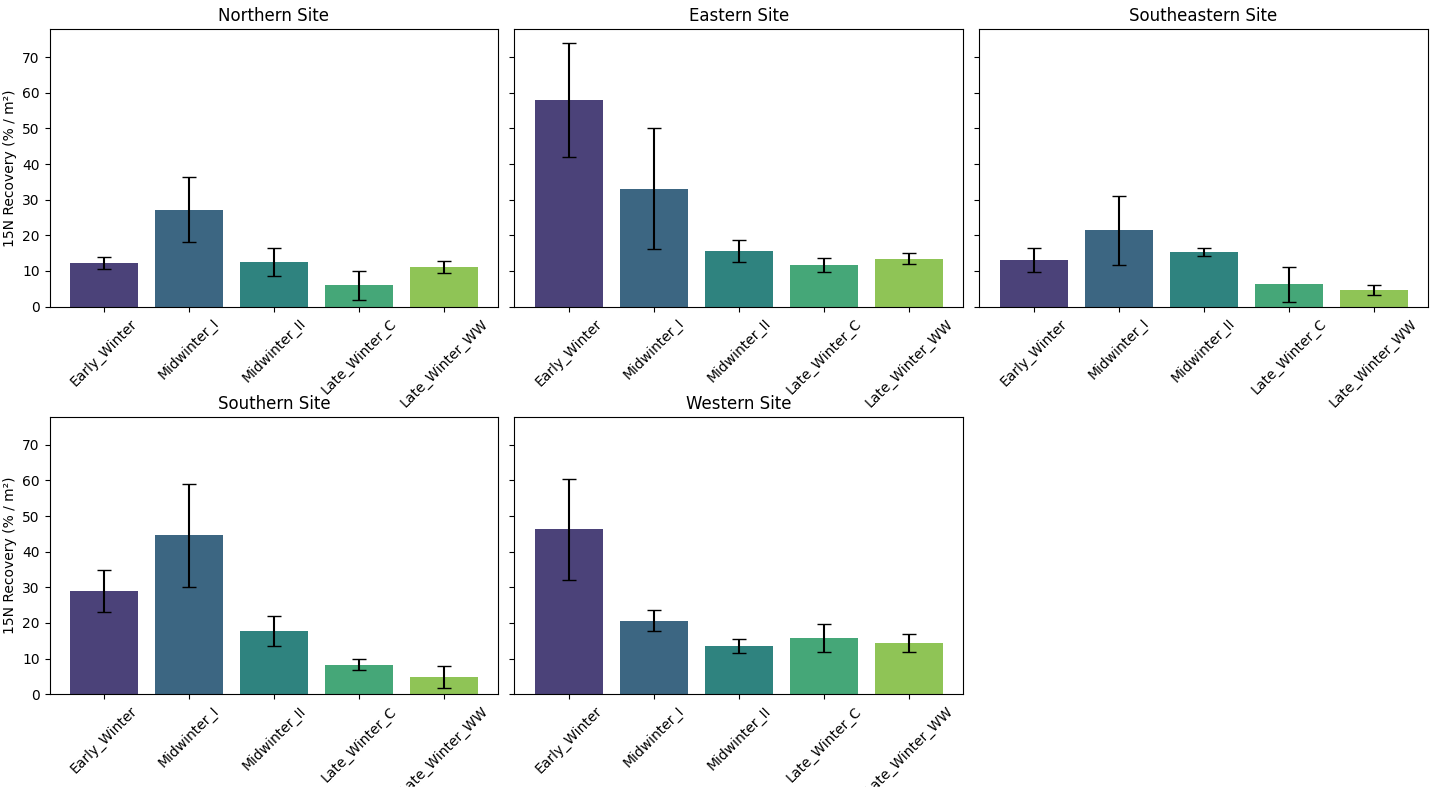

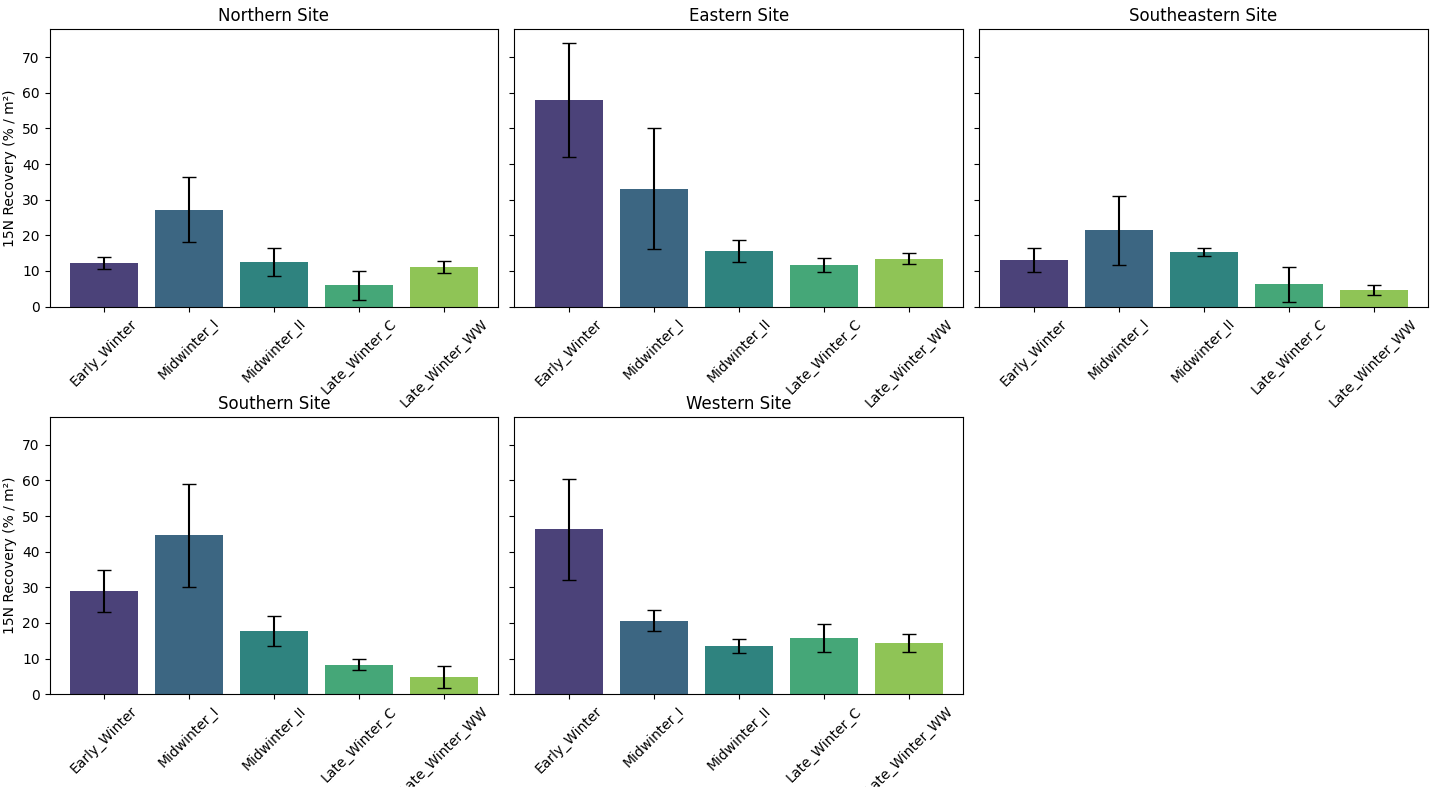

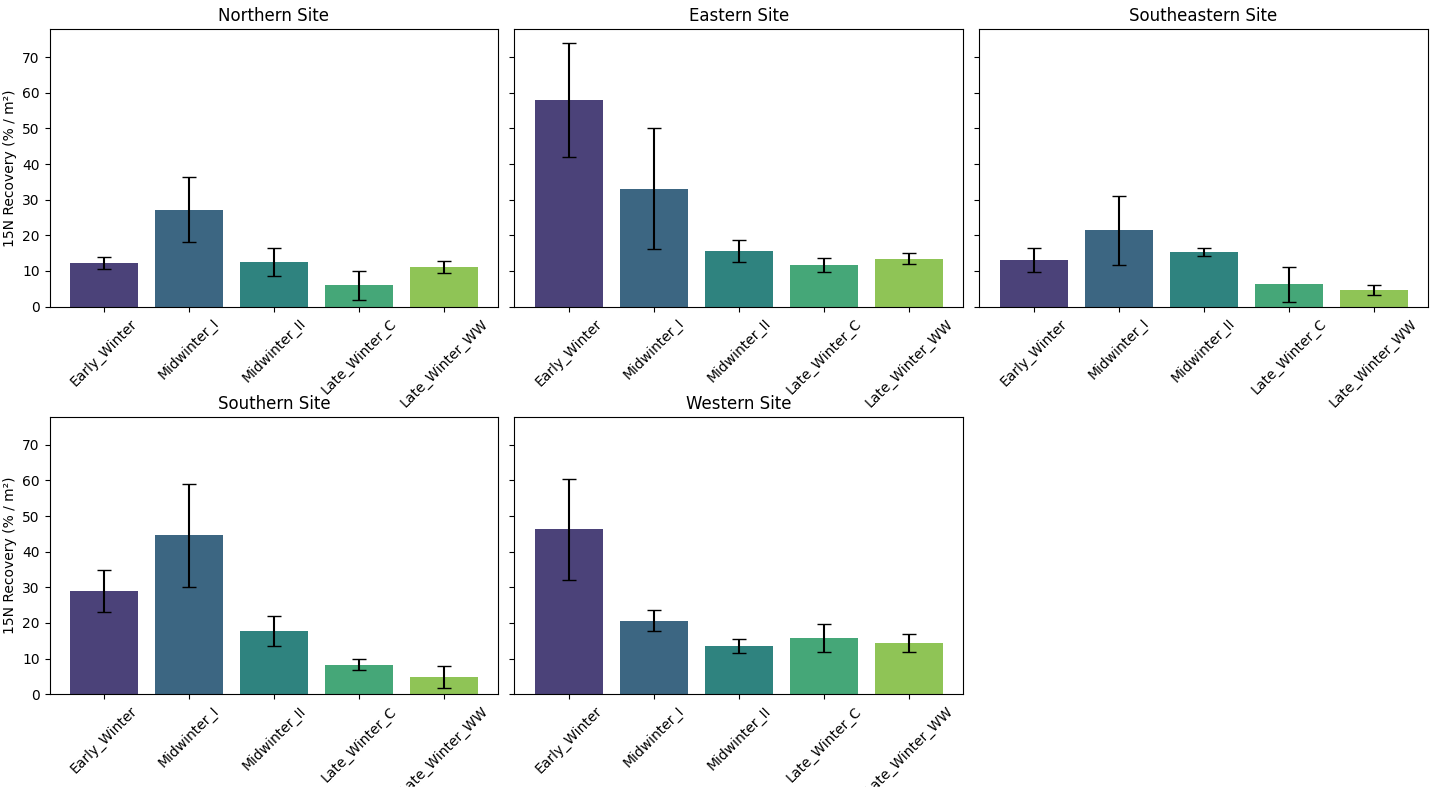

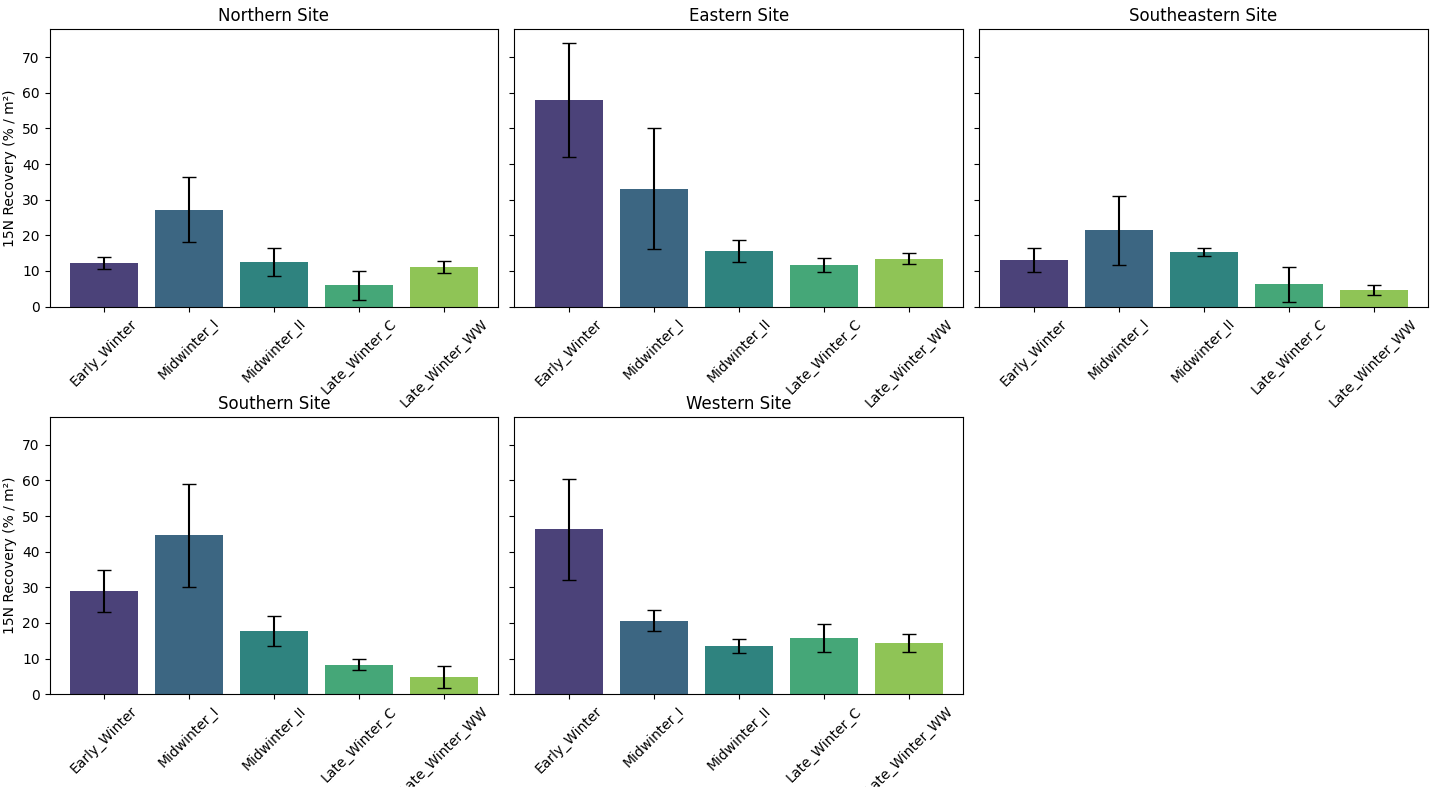


**Figure S3: Microbial N recovery**


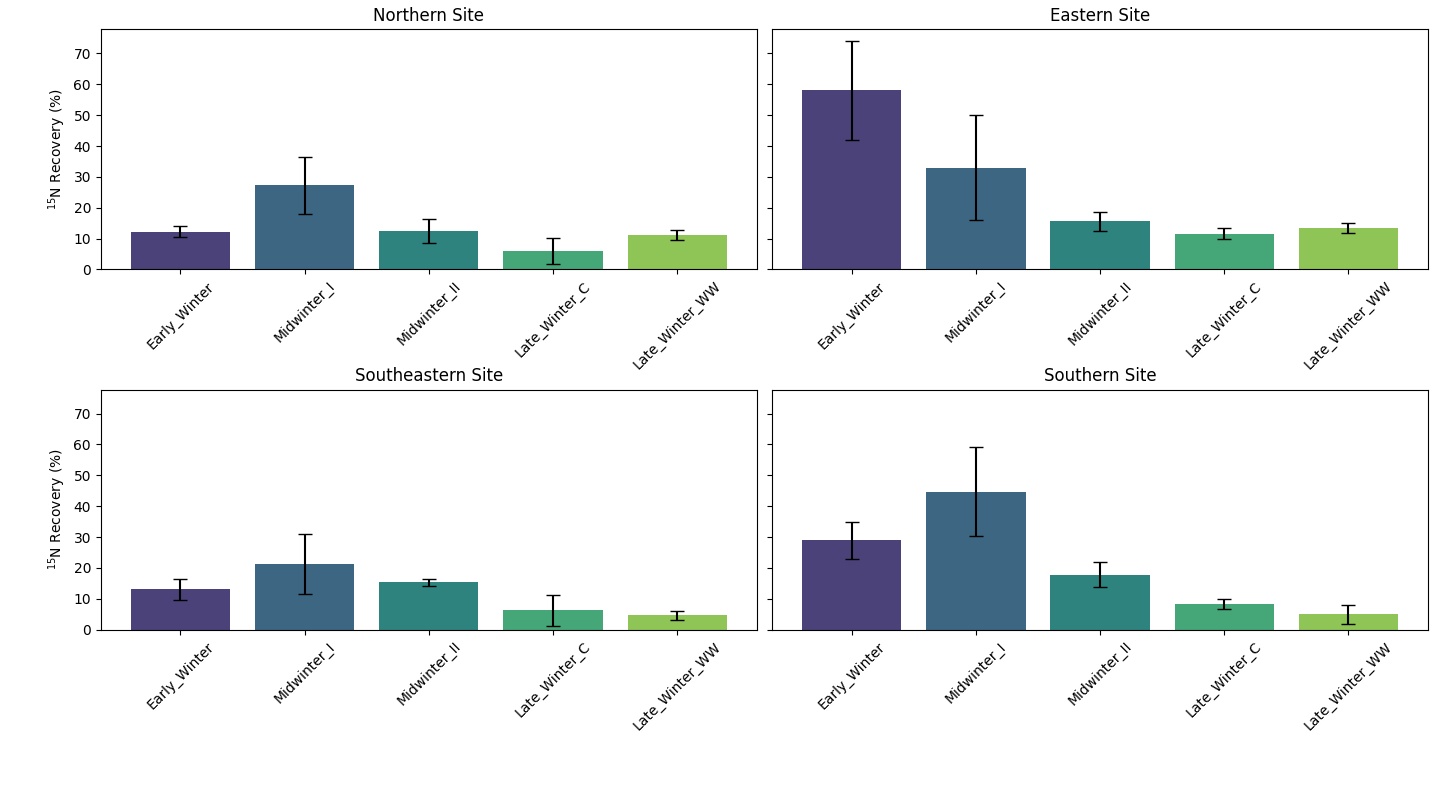

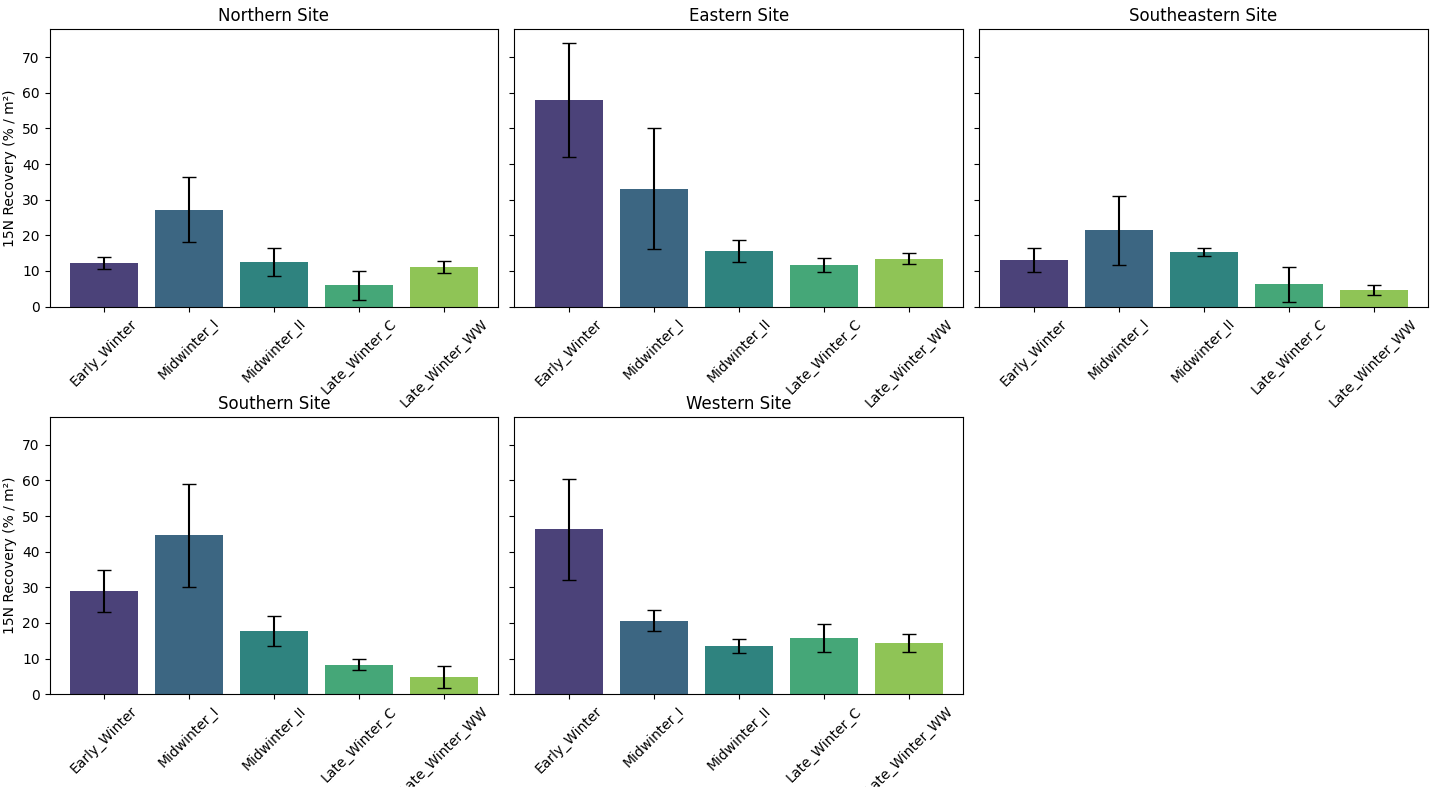

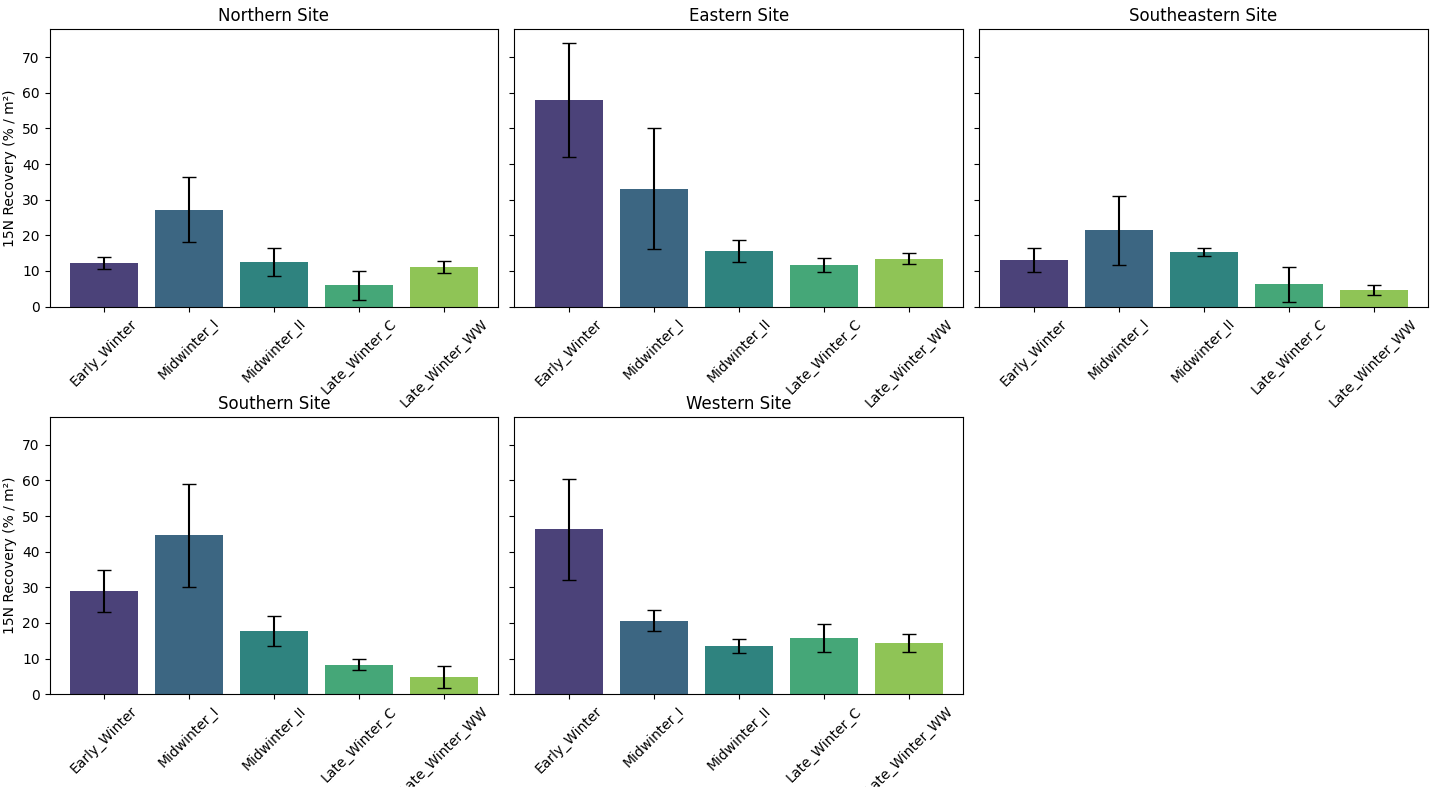


**Figure S3: 15N recovery (%) of tracer N injection in microbes split on site over the winter stages.**

**Figure S4: Soil water content of tracer N**


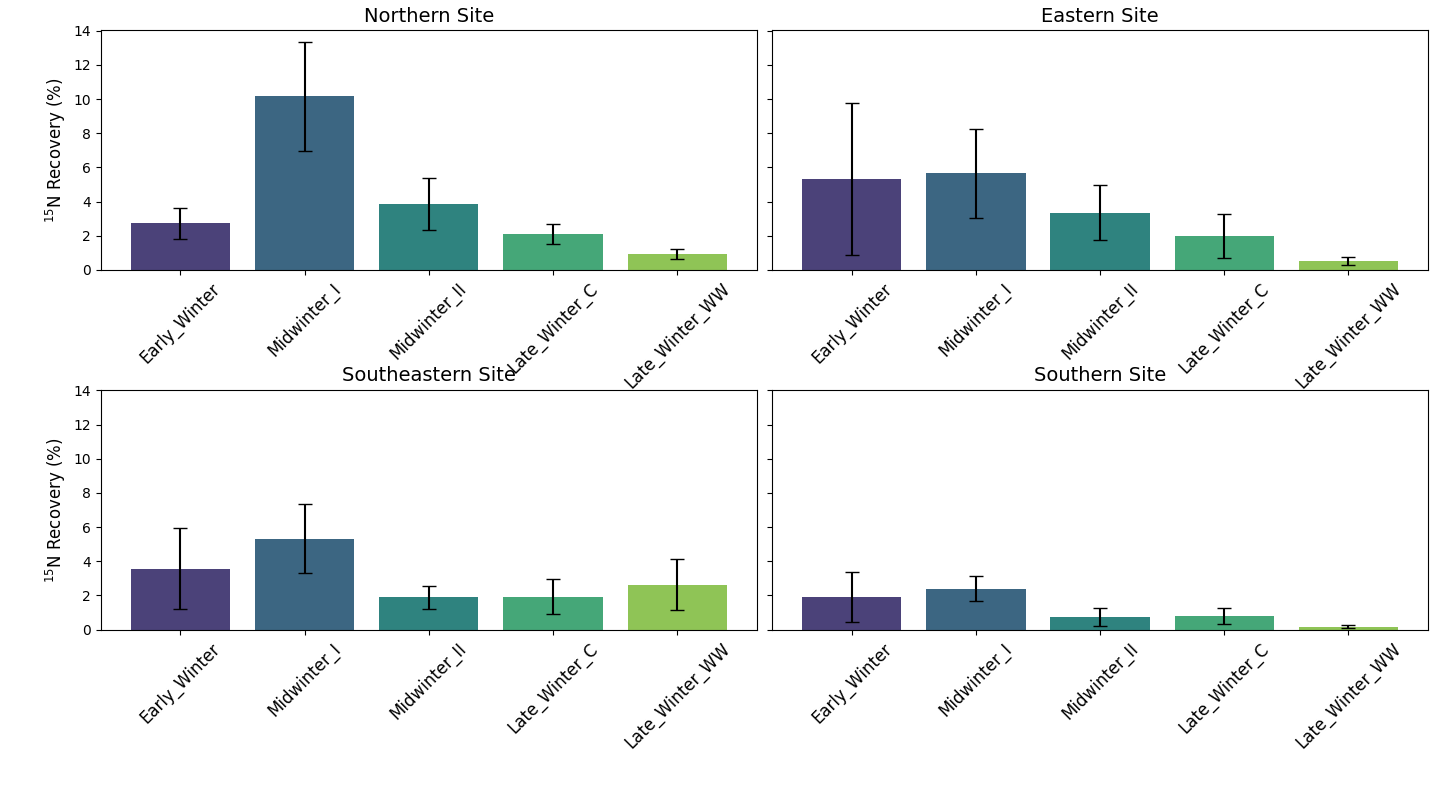

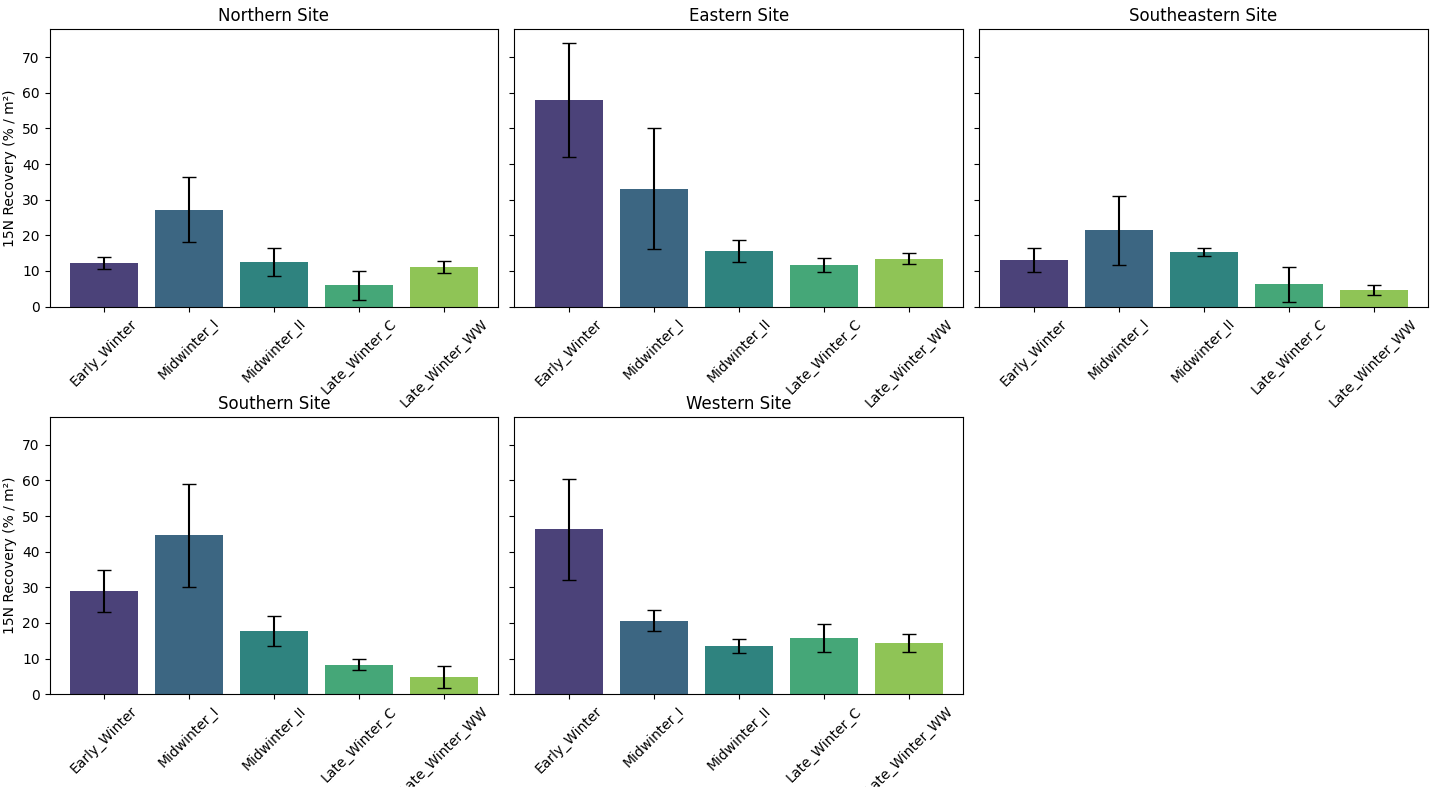

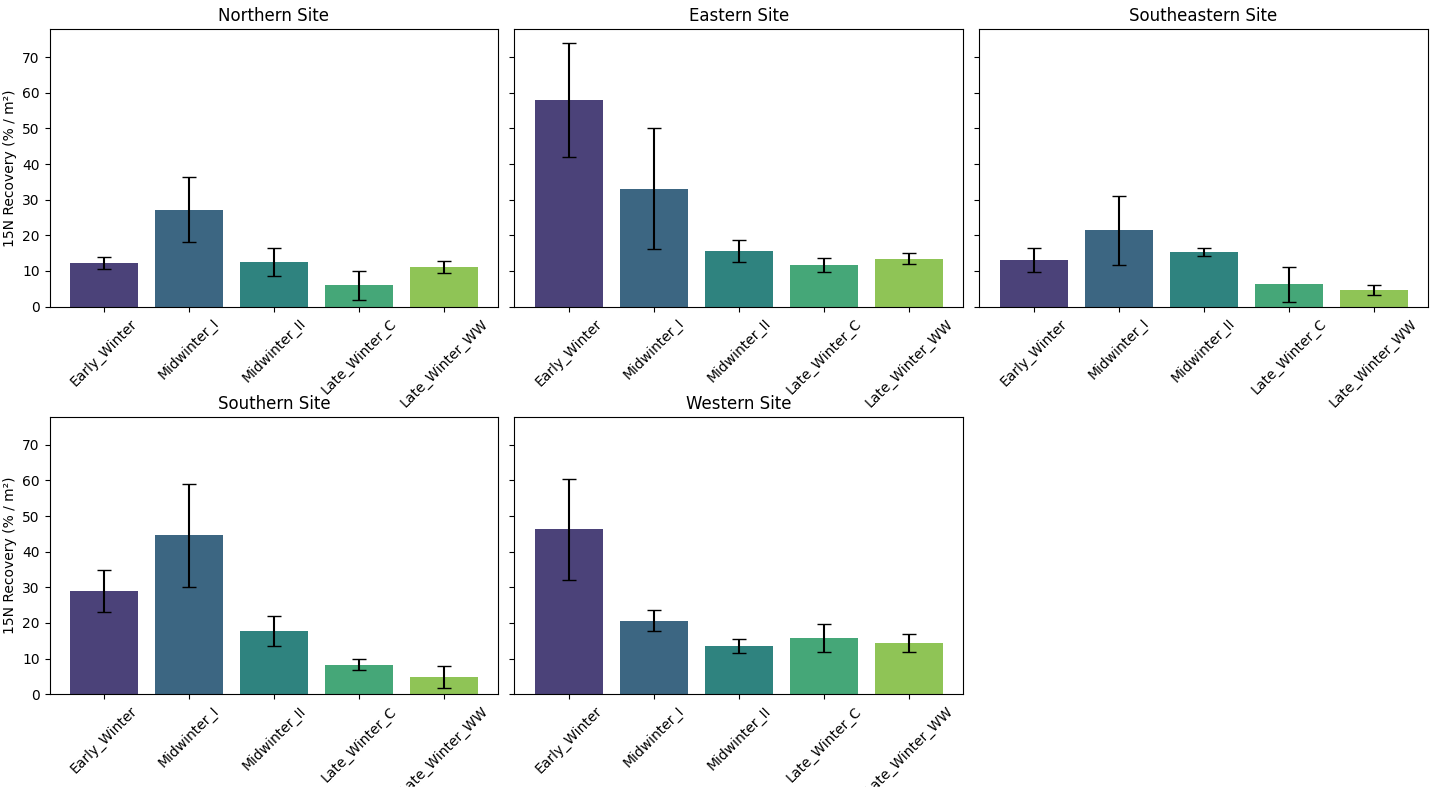


**Figure S4: 15N recovery (%) of tracer N injection in soil solution.**

**Figure S5: Aboveground recovery (%) on unit area basis species-specifically – North:**


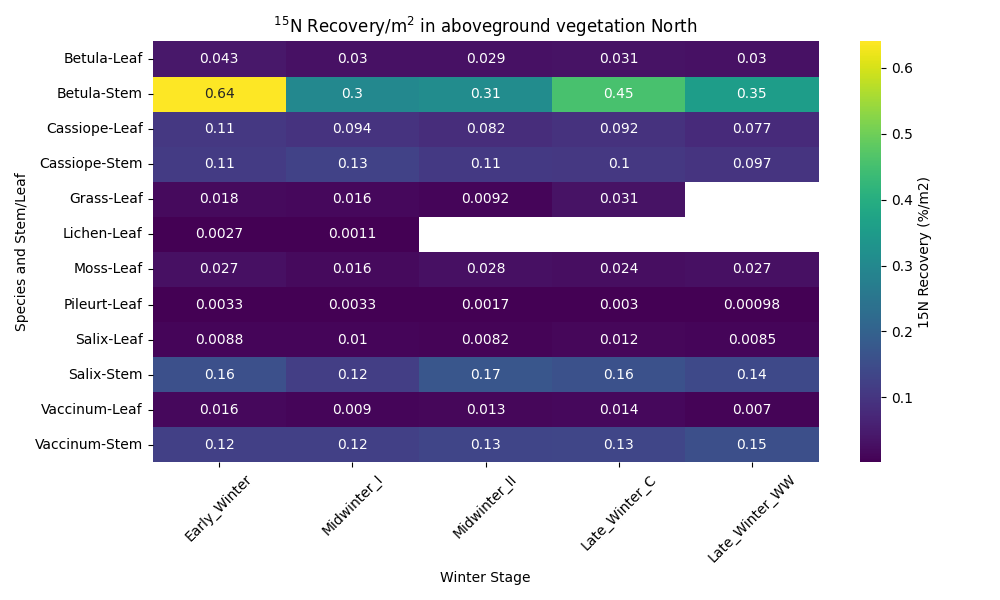
**Figure S5+S6: 15N recovery (% of tracer injected) in aboveground biomass species-specifically and split in fractions in the Northern site (S6) and in the Eastern site (S7).**

15N recovery (%)

**Figure S6: Aboveground recovery (%) on unit area basis species-specifically – East:**


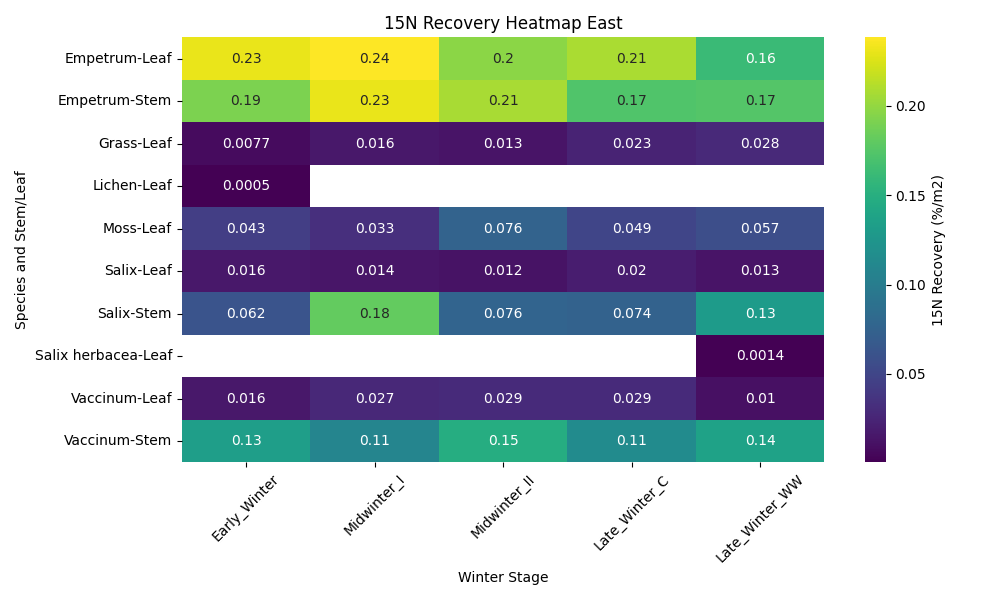


15N recovery (%)


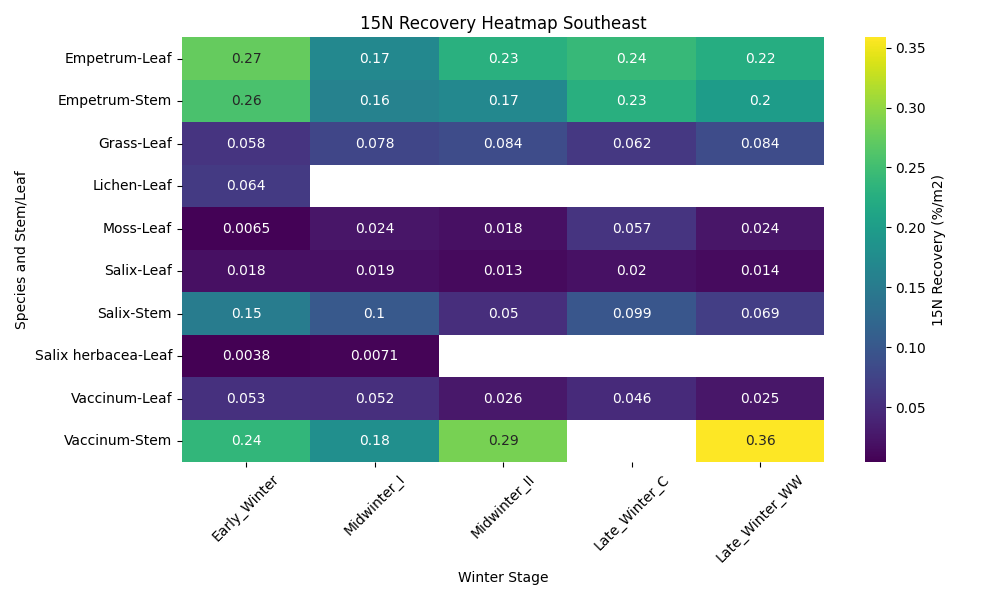
**Figure S7: Aboveground recovery (%) on unit area basis species-specifically – Southeast**:

15N recovery (%)

**Figure S7+S8: 15N recovery (% of tracer injected) in aboveground biomass species-specifically and split in fractions in the Southeastern site (S9) and in the Southern site (S10).**

**Figure S8: Aboveground recovery (%) on unit area basis species-specifically – South:**


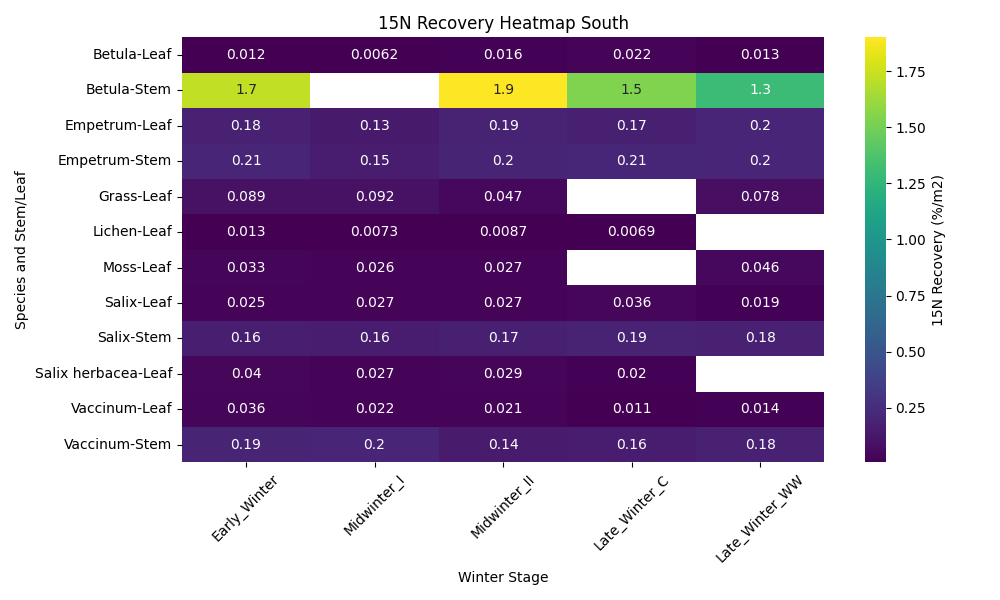


15N recovery (%)

**Figure S9: Aboveground 15N recovery species-specifically averaged over site and winter stage, including comparison to *Empetrum***

**Figure S9: Species-specific 15N recovery per unit area across the climate gradient and winter stage**


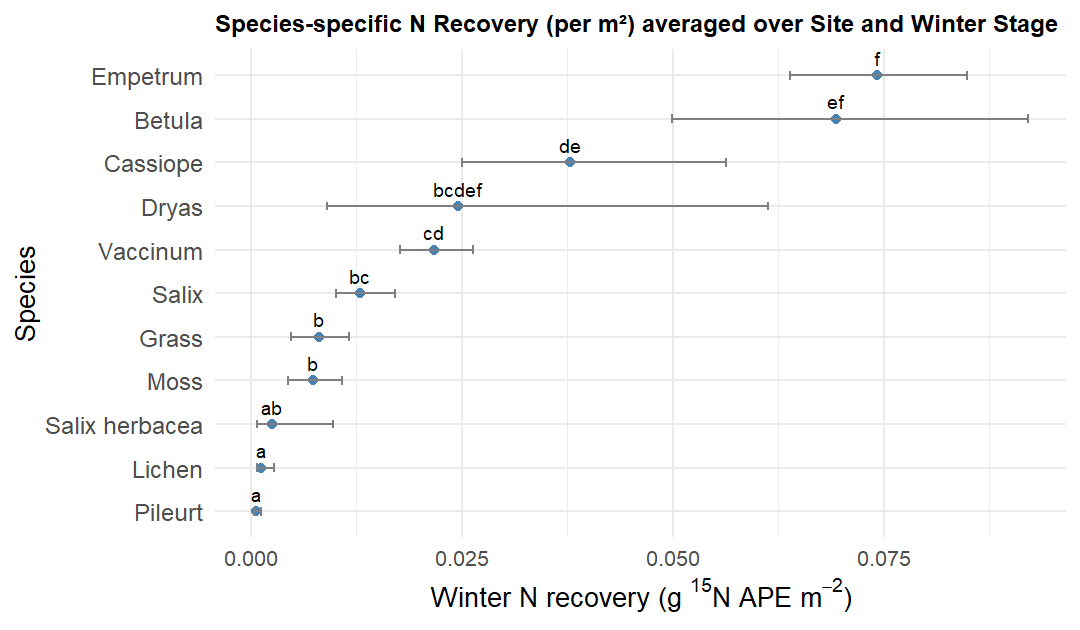


Salix arctica

Bistorta

Bryophytes

**Figure S9: Winter-released 15N uptake per unit area for the dominating vegetation (leaf and stem pooled) to the level of species (shrubs and common forbs) and plant functional type (Bryophyteses, grasses, lichen). Pairwise comparisons were made with Tukey’s adjusted pairwise t-test, df=853,,significance level = 0.05). Genus terms refer to: Empetrum nigrum, Betula nana, Cassiope tetragona, Dryas integrifolia, Vaccinum uliginosum, Salix arctica, Polygonum viviparum.**

**
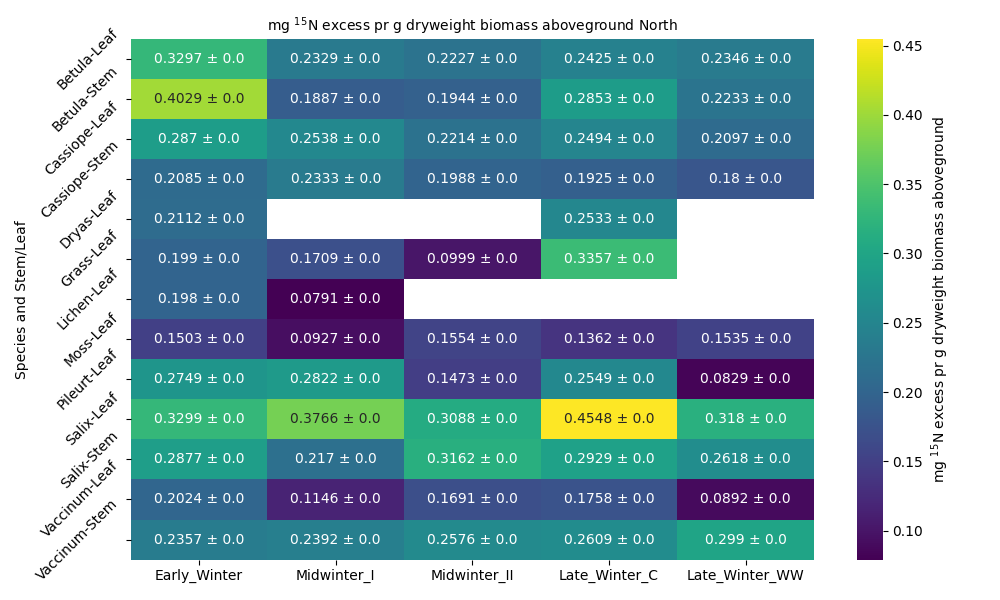
Figure S10: Species-specific 15N excess pr g dry weight in aboveground vegetation Northern site**

**Figure S10: 15N recovery (mg excess) in aboveground biomass/g dryweight biomass species-specifically and split in fractions in the Northern site.**

**
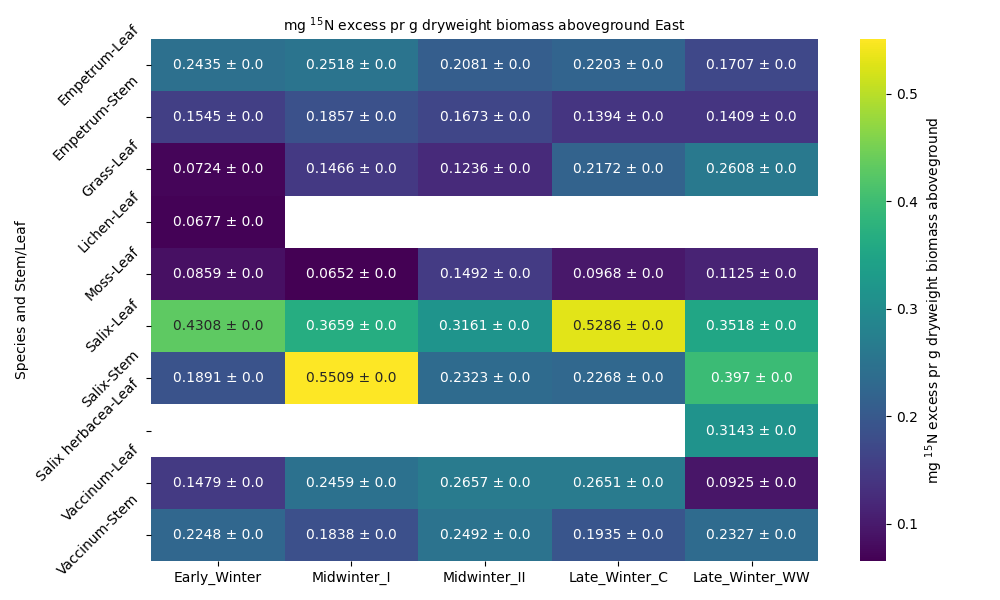
Figure S11:** **Species-specific 15N excess pr g dry weight in aboveground vegetation Eastern site**

**Figure S11: 15N recovery (mg excess) in aboveground biomass/ g dry weight biomass species-specifically in the Eastern site.**

**
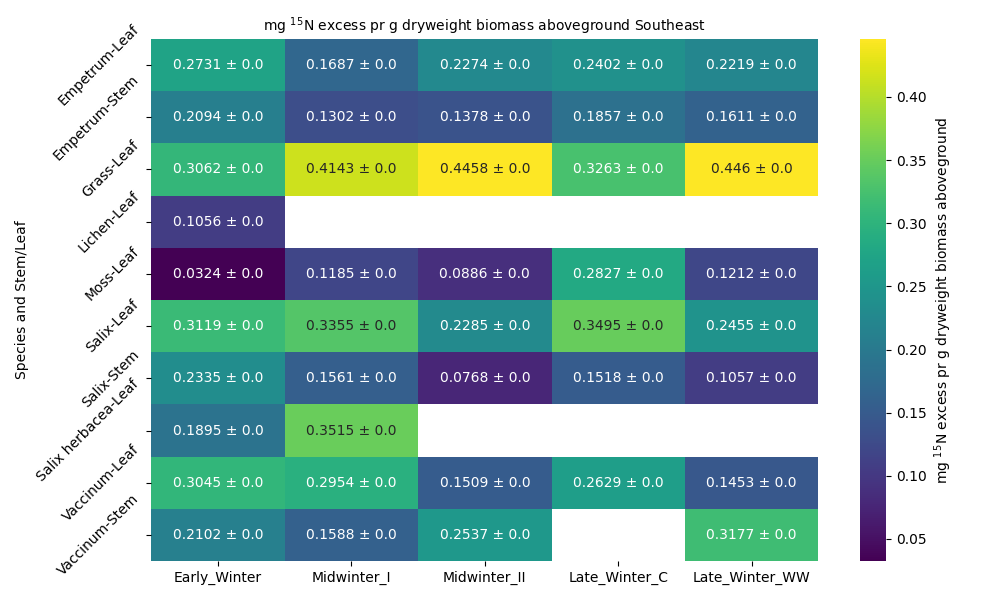
Figure S12: Species-specific 15N excess pr g dry weight in aboveground vegetation Southeastern site**

**Figure S12: 15N recovery (mg excess) in aboveground biomass/g dry weight biomass species-specifically in the Southeastern site.**

**
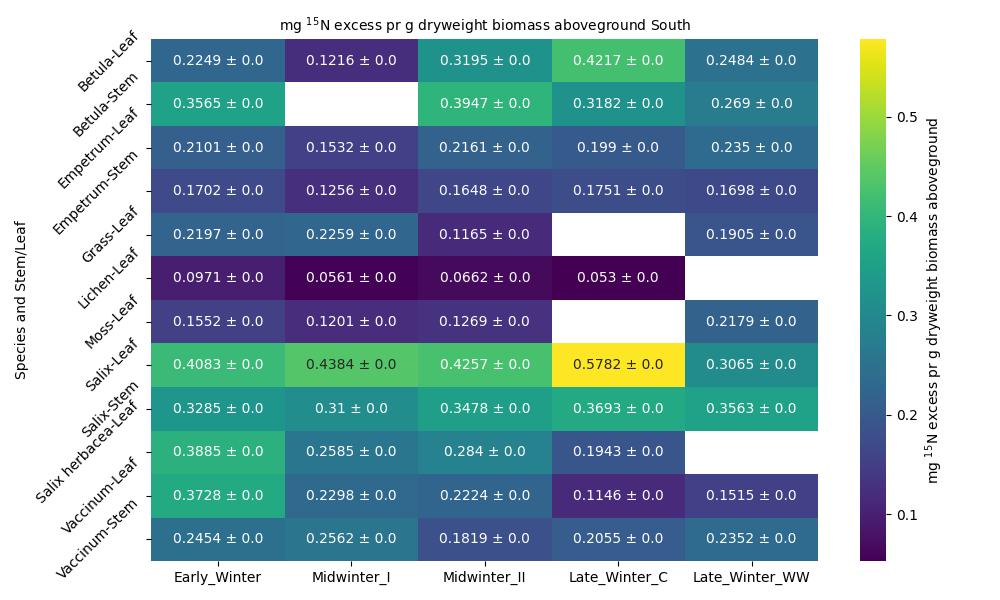
Figure S13: Species-specific 15N excess pr g dry weight in aboveground vegetation Southern site**

**Figure S13: 15N recovery (mg excess) in aboveground biomass/g dry weight biomass species-specifically in the Southern site.**

GLMM_supplementary_code_S1-3

2026-01-14

# Supplementary code S1: Roots

Read in the data and factorize the factors

df_roots <- read_xlsx("Your_directory/df_roots.xlsx")

New names:
• `` -> `...1`

df_roots <- df_roots %>% rename(APE15N_pr_m2='g_root_15APE%_per_m2')
df_roots <- df_roots %>% rename(APE15N='15NAPE%')

df_roots <- df_roots %>% mutate(Fine_coarse=factor(Fine_coarse))
df_roots <- df_roots %>% mutate(Winter_stage=factor(Winter_stage))
df_roots <- df_roots %>% mutate(Site=factor(Site))

Test whether it is normally distributed and transform to get as close to normality as possible

print(bestNormalize(df_roots$APE15N_pr_m2))

Best Normalizing transformation with 254 Observations
 Estimated Normality Statistics (Pearson P / df, lower => more normal):
 - arcsinh(x): 8.5545
 - Box-Cox: 1.0225
 - Center+scale: 10.7064
 - Double Reversed Log_b(x+a): 9.9826
 - Exp(x): 17.3163
 - Log_b(x+a): 1.0024
 - orderNorm (ORQ): 1.0479
 - sqrt(x + a): 3.4418
 - Yeo-Johnson: 3.0786
Estimation method: Out-of-sample via CV with 10 folds and 5 repeats

Based off these, bestNormalize chose:
Standardized Log_b(x + a) Transformation with 254 nonmissing obs.:
 Relevant statistics:
 - a = 0.0001335876
 - b = 10
 - mean (before standardization) = -1.101368
 - sd (before standardization) = 0.7389304

print(bestNormalize(df_roots$Recovery_15N_pr_m2))

Best Normalizing transformation with 254 Observations
 Estimated Normality Statistics (Pearson P / df, lower => more normal):
 - arcsinh(x): 6.5333
 - Box-Cox: 1.2859
 - Center+scale: 10.6635
 - Double Reversed Log_b(x+a): 9.5439
 - Exp(x): 21.6822
 - Log_b(x+a): 1.2058
 - orderNorm (ORQ): 1.345
 - sqrt(x + a): 3.7949
 - Yeo-Johnson: 2.634
Estimation method: Out-of-sample via CV with 10 folds and 5 repeats

Based off these, bestNormalize chose:
Standardized Log_b(x + a) Transformation with 254 nonmissing obs.:
 Relevant statistics:
 - a = 0
 - b = 10
 - mean (before standardization) = -0.7277019
 - sd (before standardization) = 0.7438546

print(bestNormalize(df_roots$APE15N))

Best Normalizing transformation with 257 Observations
 Estimated Normality Statistics (Pearson P / df, lower => more normal):
 - arcsinh(x): 1.3737
 - Box-Cox: 1.0746
 - Center+scale: 3.5264
 - Double Reversed Log_b(x+a): 4.6838
 - Exp(x): 21.3275
 - Log_b(x+a): 1.2661
 - orderNorm (ORQ): 1.143
 - sqrt(x + a): 1.4426
 - Yeo-Johnson: 1.1145
Estimation method: Out-of-sample via CV with 10 folds and 5 repeats

Based off these, bestNormalize chose:
Standardized Box Cox Transformation with 257 nonmissing obs.:
 Estimated statistics:
 - lambda = 0.165728
 - mean (before standardization) = -0.01004242
 - sd (before standardization) = 1.05502

print(bestNormalize(df_roots$mg_root_15NAPE_per_g_dry_root))

Best Normalizing transformation with 257 Observations
 Estimated Normality Statistics (Pearson P / df, lower => more normal):
 - arcsinh(x): 4.1183
 - Box-Cox: 1.0598
 - Center+scale: 4.4527
 - Double Reversed Log_b(x+a): 4.8265
 - Exp(x): 6.8689
 - Log_b(x+a): 1.3185
 - orderNorm (ORQ): 1.1444
 - sqrt(x + a): 1.4811
 - Yeo-Johnson: 1.0602
Estimation method: Out-of-sample via CV with 10 folds and 5 repeats

Based off these, bestNormalize chose:
Standardized Box Cox Transformation with 257 nonmissing obs.:
 Estimated statistics:
 - lambda = 0.1331583
 - mean (before standardization) = -2.172784
 - sd (before standardization) = 0.7453817

print(bestNormalize(df_roots$Total_dryweight_roots_mesocosm))

Best Normalizing transformation with 269 Observations
 Estimated Normality Statistics (Pearson P / df, lower => more normal):
 - arcsinh(x): 1.2001
 - Box-Cox: 1.131
 - Center+scale: 6.5614
 - Double Reversed Log_b(x+a): 8.0404
 - Exp(x): 14.6902
 - Log_b(x+a): 1.1311
 - orderNorm (ORQ): 1.332
 - sqrt(x + a): 2.2967
 - Yeo-Johnson: 1.197
Estimation method: Out-of-sample via CV with 10 folds and 5 repeats

Based off these, bestNormalize chose:
Standardized Box Cox Transformation with 269 nonmissing obs.:
 Estimated statistics:
 - lambda = 0.03515886
 - mean (before standardization) = 1.66349
 - sd (before standardization) = 1.437278

#Log transform the response variable
df_roots <- df_roots %>%
 mutate(Total_dryweight_roots_mesocosm=log(Total_dryweight_roots_mesocosm))

#Log transform the response variable
df_roots <- df_roots %>% mutate(APE15N_pr_m2=log(APE15N_pr_m2))
df_roots <- df_roots %>% mutate(mg_root_15NAPE_per_g_dry_root=log(mg_root_15NAPE_per_g_dry_root))

df_roots <- df_roots %>% mutate(Recovery_15N_pr_m2=log(Recovery_15N_pr_m2))

#YeoJOhnson tranform the APE data (not scaled pr m2)
rootAPE_data <- df_roots$APE15N

#Apply the orderNorm transformation

yeo_johnson <- yeojohnson(rootAPE_data, lambda = -0.8330408)

#Transformed data

df_roots$APE15N <- yeo_johnson$x.t

## Modelling: root biomass

This model tests the effect of Site, Winter stage and root fraction on root biomass. It also puts the intercept between site and winter stage as a random factor, taking into account the non-independence of Winter stage within each site (repeated measures)

df_roots$Site <- relevel(df_roots$Site, ref = "Southern")
root_biomass_mesocosm <- glmmTMB(Total_dryweight_roots_mesocosm ~ Site * Winter_stage + Site*Fine_coarse + (1 | Site:Winter_stage), data = df_roots, family = gaussian)

plot (residuals(root_biomass_mesocosm))


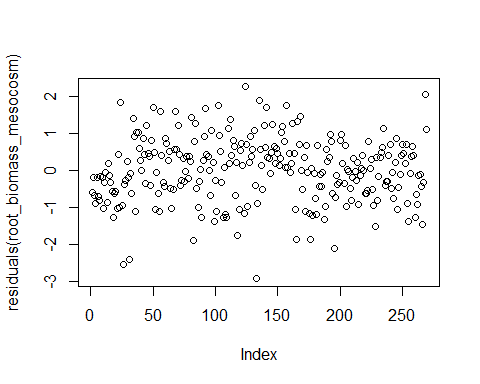


summary(root_biomass_mesocosm)

Family: gaussian ( identity )
Formula:
Total_dryweight_roots_mesocosm ~ Site * Winter_stage + Site *
 Fine_coarse + (1 | Site:Winter_stage)
Data: df_roots

 AIC BIC logLik -2*log(L) df.resid
 734.2 827.6 -341.1 682.2 243

Random effects:

Conditional model:
 Groups Name Variance Std.Dev.
 Site:Winter_stage (Intercept) 1.583e-10 1.258e-05
 Residual 7.394e-01 8.599e-01
Number of obs: 269, groups: Site:Winter_stage, 20

Dispersion estimate for gaussian family (sigma^2): 0.739

Conditional model:
 Estimate Std. Error z value
(Intercept) 2.292005 0.243674 9.406
SiteEastern 0.747447 0.344826 2.168
SiteNorthern 0.520809 0.325135 1.602
SiteSoutheastern 0.714236 0.342547 2.085
Winter_stageLate_Winter_C -0.170769 0.376524 -0.454
Winter_stageLate_Winter_WW 0.163158 0.376524 0.433
Winter_stageMidwinter_I 0.379592 0.304612 1.246
Winter_stageMidwinter_II 0.009464 0.309124 0.031
Fine_coarseFine -2.520772 0.215182 -11.715
SiteEastern:Winter_stageLate_Winter_C -0.102832 0.532485 -0.193
SiteNorthern:Winter_stageLate_Winter_C -0.817734 0.502673 -1.627
SiteSoutheastern:Winter_stageLate_Winter_C -0.404805 0.529535 -0.764
SiteEastern:Winter_stageLate_Winter_WW -1.286326 0.532485 -2.416
SiteNorthern:Winter_stageLate_Winter_WW -1.500043 0.502673 -2.984
SiteSoutheastern:Winter_stageLate_Winter_WW -0.889162 0.529535 -1.679
SiteEastern:Winter_stageMidwinter_I -0.550008 0.433989 -1.267
SiteNorthern:Winter_stageMidwinter_I -0.880010 0.410731 -2.143
SiteSoutheastern:Winter_stageMidwinter_I -0.177912 0.433989 -0.410
SiteEastern:Winter_stageMidwinter_II -0.608974 0.437168 -1.393
SiteNorthern:Winter_stageMidwinter_II -0.953925 0.411701 -2.317
SiteSoutheastern:Winter_stageMidwinter_II -0.261967 0.433570 -0.604
SiteEastern:Fine_coarseFine 0.959771 0.305449 3.142
SiteNorthern:Fine_coarseFine 0.969645 0.289424 3.350
SiteSoutheastern:Fine_coarseFine 0.753439 0.305449 2.467
 Pr(>|z|)
(Intercept) < 2e-16 ***
SiteEastern 0.030189 *
SiteNorthern 0.109195
SiteSoutheastern 0.037063 *
Winter_stageLate_Winter_C 0.650158
Winter_stageLate_Winter_WW 0.664777
Winter_stageMidwinter_I 0.212709
Winter_stageMidwinter_II 0.975576
Fine_coarseFine < 2e-16 ***
SiteEastern:Winter_stageLate_Winter_C 0.846867
SiteNorthern:Winter_stageLate_Winter_C 0.103785
SiteSoutheastern:Winter_stageLate_Winter_C 0.444597
SiteEastern:Winter_stageLate_Winter_WW 0.015705 *
SiteNorthern:Winter_stageLate_Winter_WW 0.002844 **
SiteSoutheastern:Winter_stageLate_Winter_WW 0.093125 .
SiteEastern:Winter_stageMidwinter_I 0.205037
SiteNorthern:Winter_stageMidwinter_I 0.032150 *
SiteSoutheastern:Winter_stageMidwinter_I 0.681846
SiteEastern:Winter_stageMidwinter_II 0.163620
SiteNorthern:Winter_stageMidwinter_II 0.020502 *
SiteSoutheastern:Winter_stageMidwinter_II 0.545704
SiteEastern:Fine_coarseFine 0.001677 **
SiteNorthern:Fine_coarseFine 0.000807 ***
SiteSoutheastern:Fine_coarseFine 0.013638 *
---
Signif. codes: 0 '***' 0.001 '**' 0.01 '*' 0.05 '.' 0.1 ' ' 1

### Get emmeans and back-transform to original scale

Create reference grid and specify transformation

rg <- ref_grid(root_biomass_mesocosm)

rg <- update(rg, tran = "log") # explicitly tell emmeans it's log-transformed

em_site <- emmeans(rg, ~ Site)

NOTE: Results may be misleading due to involvement in interactions

summary(em_site, type = "response")

Site response SE df lower.CL upper.CL
 Southern 3.03 0.345 243 2.42 3.79
 Eastern 6.21 0.709 243 4.96 7.77
 Northern 3.61 0.368 243 2.95 4.41
 Southeastern 6.37 0.728 243 5.09 7.98

Results are averaged over the levels of: Winter_stage, Fine_coarse
Confidence level used: 0.95
Intervals are back-transformed from the log scale

## **Modelling: root N uptake**

This model tests the effect of Site, WInter stage and root fraction. It also puts the intercept between site and winter stage as a random factor, taking into account the non-independence of Winter stage within each site (repeated measures)

In this model, we fit root 15N excess pr m2 (unit area) with Eastern site as the base level.

df_roots$Site <- relevel(df_roots$Site, ref = "Eastern")
df_roots$Winter_stage <- relevel(df_roots$Winter_stage, ref = "Late_Winter_C")

roots_m2_model <- glmmTMB(APE15N_pr_m2 ~ Site * Winter_stage + Fine_coarse + (1 | Site:Winter_stage), data = df_roots, family = gaussian)

plot(residuals(roots_m2_model))


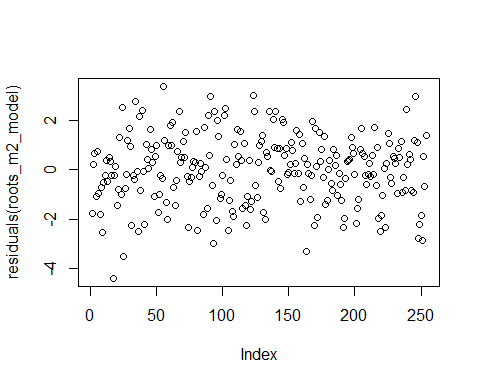


shapiro.test(residuals(roots_m2_model))

Shapiro-Wilk normality test

data: residuals(roots_m2_model)
W = 0.99431, p-value = 0.458

summary(roots_m2_model)

Family: gaussian ( identity )
Formula:
APE15N_pr_m2 ~ Site * Winter_stage + Fine_coarse + (1 | Site:Winter_stage)
Data: df_roots

 AIC BIC logLik -2*log(L) df.resid
 930.5 1011.9 -442.3 884.5 231

Random effects:

Conditional model:
 Groups Name Variance Std.Dev.
 Site:Winter_stage (Intercept) 6.879e-10 2.623e-05
 Residual 1.905e+00 1.380e+00
Number of obs: 254, groups: Site:Winter_stage, 20

Dispersion estimate for gaussian family (sigma^2): 1.9

Conditional model:
 Estimate Std. Error z value
(Intercept) -0.93227 0.49573 -1.881
SiteSouthern -1.06585 0.78858 -1.352
SiteNorthern -1.32158 0.65469 -2.019
SiteSoutheastern -0.23603 0.71443 -0.330
Winter_stageEarly_Winter 0.11334 0.60428 0.188
Winter_stageLate_Winter_WW -0.30293 0.69010 -0.439
Winter_stageMidwinter_I 0.15180 0.60428 0.251
Winter_stageMidwinter_II -0.23902 0.60428 -0.396
Fine_coarseFine -1.30104 0.17470 -7.447
SiteSouthern:Winter_stageEarly_Winter -0.47493 0.94557 -0.502
SiteNorthern:Winter_stageEarly_Winter -0.02118 0.80678 -0.026
SiteSoutheastern:Winter_stageEarly_Winter -1.10731 0.86986 -1.273
SiteSouthern:Winter_stageLate_Winter_WW -0.56408 1.04790 -0.538
SiteNorthern:Winter_stageLate_Winter_WW -0.09995 0.93728 -0.107
SiteSoutheastern:Winter_stageLate_Winter_WW -0.44698 0.99331 -0.450
SiteSouthern:Winter_stageMidwinter_I 0.10562 0.93529 0.113
SiteNorthern:Winter_stageMidwinter_I -0.92533 0.81330 -1.138
SiteSoutheastern:Winter_stageMidwinter_I 0.20005 0.87993 0.227
SiteSouthern:Winter_stageMidwinter_II -0.53588 0.94036 -0.570
SiteNorthern:Winter_stageMidwinter_II -0.58738 0.80678 -0.728
SiteSoutheastern:Winter_stageMidwinter_II -0.36586 0.86986 -0.421
 Pr(>|z|)
(Intercept) 0.0600 .
SiteSouthern 0.1765
SiteNorthern 0.0435 *
SiteSoutheastern 0.7411
Winter_stageEarly_Winter 0.8512
Winter_stageLate_Winter_WW 0.6607
Winter_stageMidwinter_I 0.8016
Winter_stageMidwinter_II 0.6924
Fine_coarseFine 9.54e-14 ***
SiteSouthern:Winter_stageEarly_Winter 0.6155
SiteNorthern:Winter_stageEarly_Winter 0.9791
SiteSoutheastern:Winter_stageEarly_Winter 0.2030
SiteSouthern:Winter_stageLate_Winter_WW 0.5904
SiteNorthern:Winter_stageLate_Winter_WW 0.9151
SiteSoutheastern:Winter_stageLate_Winter_WW 0.6527
SiteSouthern:Winter_stageMidwinter_I 0.9101
SiteNorthern:Winter_stageMidwinter_I 0.2552
SiteSoutheastern:Winter_stageMidwinter_I 0.8202
SiteSouthern:Winter_stageMidwinter_II 0.5688
SiteNorthern:Winter_stageMidwinter_II 0.4666
SiteSoutheastern:Winter_stageMidwinter_II 0.6741
---
Signif. codes: 0 '***' 0.001 '**' 0.01 '*' 0.05 '.' 0.1 ' ' 1

drop1(roots_m2_model, test = 'Chisq')

Single term deletions

Model:
APE15N_pr_m2 ~ Site * Winter_stage + Fine_coarse + (1 | Site:Winter_stage)
 Df AIC LRT Pr(>Chi)
<none> 930.51
Fine_coarse 1 978.68 50.164 1.414e-12 ***
Site:Winter_stage 12 919.74 13.228 0.3527
---
Signif. codes: 0 '***' 0.001 '**' 0.01 '*' 0.05 '.' 0.1 ' ' 1

We then get the estimated marginal means

rg <- ref_grid(roots_m2_model)
rg <- update(rg, tran = "log") # explicitly tell emmeans it's log-transformed

# Get emmeans and back-transform to original scale
em_site <- emmeans(rg, ~ Site)

NOTE: Results may be misleading due to involvement in interactions

summary(em_site, type = "response")

Site response SE df lower.CL upper.CL
 Eastern 0.1943 0.03600 231 0.1349 0.2799
 Southern 0.0499 0.01020 231 0.0334 0.0746
 Northern 0.0374 0.00625 231 0.0269 0.0520
 Southeastern 0.1088 0.02050 231 0.0751 0.1576

Results are averaged over the levels of: Winter_stage, Fine_coarse
Confidence level used: 0.95
Intervals are back-transformed from the log scale

emmeans(roots_m2_model, ~Site|Winter_stage, type = 'response')

Winter_stage = Late_Winter_C:
 Site emmean SE df lower.CL upper.CL
 Eastern -1.58 0.488 231 -2.54 -0.621
 Southern -2.65 0.619 231 -3.87 -1.428
 Northern -2.90 0.436 231 -3.76 -2.044
 Southeastern -1.82 0.522 231 -2.85 -0.791

Winter_stage = Early_Winter:
 Site emmean SE df lower.CL upper.CL
 Eastern -1.47 0.356 231 -2.17 -0.767
 Southern -3.01 0.383 231 -3.77 -2.255
 Northern -2.81 0.309 231 -3.42 -2.204
 Southeastern -2.81 0.345 231 -3.49 -2.133

Winter_stage = Late_Winter_WW:
 Site emmean SE df lower.CL upper.CL
 Eastern -1.89 0.488 231 -2.85 -0.924
 Southern -3.52 0.488 231 -4.48 -2.554
 Northern -3.31 0.460 231 -4.21 -2.401
 Southeastern -2.57 0.488 231 -3.53 -1.607

Winter_stage = Midwinter_I:
 Site emmean SE df lower.CL upper.CL
 Eastern -1.43 0.356 231 -2.13 -0.729
 Southern -2.39 0.357 231 -3.09 -1.688
 Northern -3.68 0.325 231 -4.32 -3.037
 Southeastern -1.47 0.369 231 -2.19 -0.740

Winter_stage = Midwinter_II:
 Site emmean SE df lower.CL upper.CL
 Eastern -1.82 0.356 231 -2.52 -1.120
 Southern -3.42 0.369 231 -4.15 -2.696
 Northern -3.73 0.309 231 -4.34 -3.123
 Southeastern -2.42 0.345 231 -3.10 -1.744

Results are averaged over the levels of: Fine_coarse
Confidence level used: 0.95

emmeans(roots_m2_model, ~Fine_coarse, type = 'response')

Fine_coarse emmean SE df lower.CL upper.CL
 Coarse -1.88 0.123 231 -2.13 -1.64
 Fine -3.19 0.133 231 -3.45 -2.92

Results are averaged over the levels of: Site, Winter_stage
Confidence level used: 0.95

We further fit a model where the response is root 15NAPE pr g dry root (unit mass).

roots_prdryweight_model <- glmmTMB(mg_root_15NAPE_per_g_dry_root ~ Site * Winter_stage + Fine_coarse + (1 | Site:Winter_stage), data = df_roots, family = gaussian)

# Plot residuals
plot(residuals(roots_prdryweight_model))


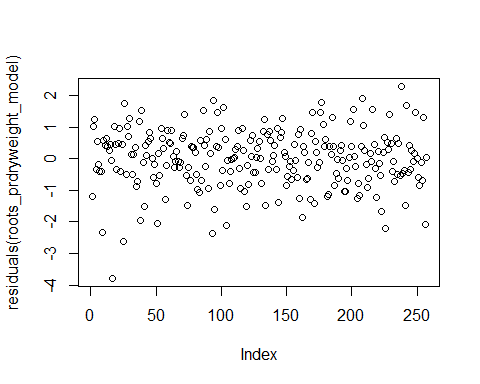


shapiro.test(residuals(roots_prdryweight_model))

Shapiro-Wilk normality test

data: residuals(roots_prdryweight_model)
W = 0.98395, p-value = 0.005452

summary(roots_prdryweight_model)

Family: gaussian ( identity )
Formula:
mg_root_15NAPE_per_g_dry_root ~ Site * Winter_stage + Fine_coarse +
 (1 | Site:Winter_stage)
Data: df_roots

 AIC BIC logLik -2*log(L) df.resid
 724.6 806.2 -339.3 678.6 234

Random effects:

Conditional model:
 Groups Name Variance Std.Dev.
 Site:Winter_stage (Intercept) 2.224e-10 1.491e-05
 Residual 8.207e-01 9.059e-01
Number of obs: 257, groups: Site:Winter_stage, 20

Dispersion estimate for gaussian family (sigma^2): 0.821

Conditional model:
 Estimate Std. Error z value
(Intercept) -2.34165 0.32531 -7.198
SiteSouthern -0.03066 0.51758 -0.059
SiteNorthern -0.31392 0.42972 -0.731
SiteSoutheastern -0.11259 0.46893 -0.240
Winter_stageEarly_Winter -0.18592 0.39228 -0.474
Winter_stageLate_Winter_WW 0.40826 0.45296 0.901
Winter_stageMidwinter_I -0.08973 0.39663 -0.226
Winter_stageMidwinter_II -0.03285 0.39663 -0.083
Fine_coarseFine 0.42555 0.11384 3.738
SiteSouthern:Winter_stageEarly_Winter 0.03756 0.61426 0.061
SiteNorthern:Winter_stageEarly_Winter -0.61363 0.52629 -1.166
SiteSoutheastern:Winter_stageEarly_Winter -0.95054 0.56787 -1.674
SiteSouthern:Winter_stageLate_Winter_WW -1.18379 0.68780 -1.721
SiteNorthern:Winter_stageLate_Winter_WW -0.33921 0.61520 -0.551
SiteSoutheastern:Winter_stageLate_Winter_WW -0.06237 0.65197 -0.096
SiteSouthern:Winter_stageMidwinter_I 0.02175 0.61389 0.035
SiteNorthern:Winter_stageMidwinter_I -1.17601 0.53157 -2.212
SiteSoutheastern:Winter_stageMidwinter_I 0.14442 0.57755 0.250
SiteSouthern:Winter_stageMidwinter_II -0.70469 0.61721 -1.142
SiteNorthern:Winter_stageMidwinter_II -0.74081 0.52955 -1.399
SiteSoutheastern:Winter_stageMidwinter_II -0.27449 0.57094 -0.481
 Pr(>|z|)
(Intercept) 6.1e-13 ***
SiteSouthern 0.952760
SiteNorthern 0.465062
SiteSoutheastern 0.810257
Winter_stageEarly_Winter 0.635526
Winter_stageLate_Winter_WW 0.367420
Winter_stageMidwinter_I 0.821017
Winter_stageMidwinter_II 0.933997
Fine_coarseFine 0.000185 ***
SiteSouthern:Winter_stageEarly_Winter 0.951241
SiteNorthern:Winter_stageEarly_Winter 0.243634
SiteSoutheastern:Winter_stageEarly_Winter 0.094159 .
SiteSouthern:Winter_stageLate_Winter_WW 0.085227 .
SiteNorthern:Winter_stageLate_Winter_WW 0.581367
SiteSoutheastern:Winter_stageLate_Winter_WW 0.923793
SiteSouthern:Winter_stageMidwinter_I 0.971737
SiteNorthern:Winter_stageMidwinter_I 0.026942 *
SiteSoutheastern:Winter_stageMidwinter_I 0.802550
SiteSouthern:Winter_stageMidwinter_II 0.253566
SiteNorthern:Winter_stageMidwinter_II 0.161827
SiteSoutheastern:Winter_stageMidwinter_II 0.630688
---
Signif. codes: 0 '***' 0.001 '**' 0.01 '*' 0.05 '.' 0.1 ' ' 1

drop1(roots_prdryweight_model, test = 'Chisq')

Single term deletions

Model:
mg_root_15NAPE_per_g_dry_root ~ Site * Winter_stage + Fine_coarse +
 (1 | Site:Winter_stage)
 Df AIC LRT Pr(>Chi)
<none> 724.55
Fine_coarse 1 736.16 13.606 0.0002254 ***
Site:Winter_stage 12 730.37 29.822 0.0029701 **
---
Signif. codes: 0 '***' 0.001 '**' 0.01 '*' 0.05 '.' 0.1 ' ' 1

Backtransforming and getting the emmeans.

rg <- ref_grid(roots_prdryweight_model)
rg <- update(rg, tran = "log") # explicitly tell emmeans it's log-transformed

# Get emmeans and back-transform to original scale
em_site <- emmeans(rg, ~ Site)

NOTE: Results may be misleading due to involvement in interactions

em_fraction <- emmeans(rg, ~ Fine_coarse)

summary(em_site, type = "response")

Site response SE df lower.CL upper.CL
 Eastern 0.1214 0.01470 234 0.0956 0.1540
 Southern 0.0816 0.01090 234 0.0628 0.1061
 Northern 0.0499 0.00546 234 0.0403 0.0619
 Southeastern 0.0863 0.01070 234 0.0677 0.1100

Results are averaged over the levels of: Winter_stage, Fine_coarse
Confidence level used: 0.95
Intervals are back-transformed from the log scale

summary(em_fraction, type = "response")

Fine_coarse response SE df lower.CL upper.CL
 Coarse 0.0653 0.00528 234 0.0557 0.0766
 Fine 0.1000 0.00861 234 0.0844 0.1185

Results are averaged over the levels of: Site, Winter_stage
Confidence level used: 0.95
Intervals are back-transformed from the log scale

# Supplementary code S2: Microbes and soil water

df_microbes <- read_xlsx("Your_directory/df_microbes.xlsx")
df_microbes <- df_microbes %>%
 rename(Microbial_µg15N_pr_m2='microgram Microbial 15N exess pr m2 to 10 cm')
df_microbes <- df_microbes %>%
 mutate(Winter_stage=factor(Winter_stage))
df_microbes <- df_microbes %>%
 mutate(Site=factor(Site))
df_microbes <- df_microbes %>%
 mutate(Microbial_µg15N_pr_m2=log(Microbial_µg15N_pr_m2))

Warning: There was 1 warning in `mutate()`.
ℹ In argument: `Microbial_µg15N_pr_m2 = log(Microbial_µg15N_pr_m2)`.
Caused by warning in `log()`:
! NaNs produced

df_microbes$Site <- relevel(df_microbes$Site, ref = "Western")

## Modelling: microbial N uptake

This model tests the effect of Site and Winter stage on microbial 15N excess/m2. It also puts the intercept between site and winter stage as a random factor, taking into account the non-independence of Winter stage within each site (repeated measures).

microbes_m2_model <- glmmTMB(Microbial_µg15N_pr_m2 ~ Site * Winter_stage + (1 | Site:Winter_stage), data = df_microbes, family = gaussian)

plot(residuals(microbes_m2_model))


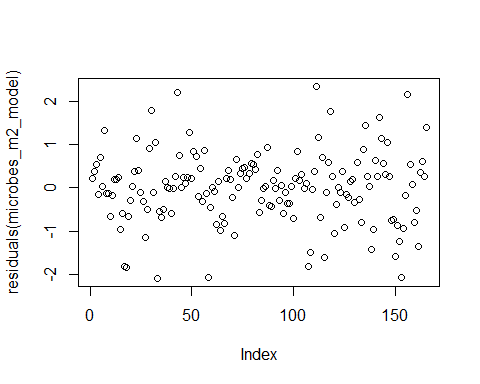


# Shapiro-Wilk test for normality
shapiro.test(residuals(microbes_m2_model))

Shapiro-Wilk normality test

data: residuals(microbes_m2_model)
W = 0.9799, p-value = 0.0169

#Summary
summary(microbes_m2_model)

Family: gaussian ( identity )
Formula:
Microbial_µg15N_pr_m2 ~ Site * Winter_stage + (1 | Site:Winter_stage)
Data: df_microbes

 AIC BIC logLik -2*log(L) df.resid
 449.8 533.7 -197.9 395.8 138

Random effects:

Conditional model:
 Groups Name Variance Std.Dev.
 Site:Winter_stage (Intercept) 1.696e-10 1.302e-05
 Residual 6.447e-01 8.029e-01
Number of obs: 165, groups: Site:Winter_stage, 25

Dispersion estimate for gaussian family (sigma^2): 0.645

Conditional model:
 Estimate Std. Error z value
(Intercept) 12.86068 0.35909 35.81
SiteEastern -0.77922 0.45775 -1.70
SiteNorthern -2.12104 0.43979 -4.82
SiteSoutheastern -1.96982 0.47016 -4.19
SiteSouthern -1.36890 0.45775 -2.99
Winter_stageLate_Winter_C -1.07150 0.53863 -1.99
Winter_stageLate_Winter_WW -1.05945 0.50783 -2.09
Winter_stageMidwinter_I -0.74716 0.43979 -1.70
Winter_stageMidwinter_II -1.17216 0.43308 -2.71
SiteEastern:Winter_stageLate_Winter_C -0.25786 0.72931 -0.35
SiteNorthern:Winter_stageLate_Winter_C -0.38197 0.69537 -0.55
SiteSoutheastern:Winter_stageLate_Winter_C -0.76652 0.73716 -1.04
SiteSouthern:Winter_stageLate_Winter_C -0.03319 0.72931 -0.05
SiteEastern:Winter_stageLate_Winter_WW -0.09686 0.74390 -0.13
SiteNorthern:Winter_stageLate_Winter_WW 1.00818 0.67179 1.50
SiteSoutheastern:Winter_stageLate_Winter_WW -0.15332 0.71496 -0.21
SiteSouthern:Winter_stageLate_Winter_WW -1.22068 0.70687 -1.73
SiteEastern:Winter_stageMidwinter_I -0.19205 0.59548 -0.32
SiteNorthern:Winter_stageMidwinter_I 1.26112 0.57404 2.20
SiteSoutheastern:Winter_stageMidwinter_I 0.81913 0.61451 1.33
SiteSouthern:Winter_stageMidwinter_I 1.02223 0.59548 1.72
SiteEastern:Winter_stageMidwinter_II 0.04803 0.59054 0.08
SiteNorthern:Winter_stageMidwinter_II 0.74086 0.56891 1.30
SiteSoutheastern:Winter_stageMidwinter_II 1.33788 0.60972 2.19
SiteSouthern:Winter_stageMidwinter_II 0.75852 0.59054 1.28
 Pr(>|z|)
(Intercept) < 2e-16 ***
SiteEastern 0.08870 .
SiteNorthern 1.42e-06 ***
SiteSoutheastern 2.79e-05 ***
SiteSouthern 0.00279 **
Winter_stageLate_Winter_C 0.04667 *
Winter_stageLate_Winter_WW 0.03696 *
Winter_stageMidwinter_I 0.08934 .
Winter_stageMidwinter_II 0.00680 **
SiteEastern:Winter_stageLate_Winter_C 0.72366
SiteNorthern:Winter_stageLate_Winter_C 0.58280
SiteSoutheastern:Winter_stageLate_Winter_C 0.29842
SiteSouthern:Winter_stageLate_Winter_C 0.96370
SiteEastern:Winter_stageLate_Winter_WW 0.89640
SiteNorthern:Winter_stageLate_Winter_WW 0.13342
SiteSoutheastern:Winter_stageLate_Winter_WW 0.83020
SiteSouthern:Winter_stageLate_Winter_WW 0.08419 .
SiteEastern:Winter_stageMidwinter_I 0.74706
SiteNorthern:Winter_stageMidwinter_I 0.02803 *
SiteSoutheastern:Winter_stageMidwinter_I 0.18254
SiteSouthern:Winter_stageMidwinter_I 0.08604 .
SiteEastern:Winter_stageMidwinter_II 0.93518
SiteNorthern:Winter_stageMidwinter_II 0.19283
SiteSoutheastern:Winter_stageMidwinter_II 0.02822 *
SiteSouthern:Winter_stageMidwinter_II 0.19898
---
Signif. codes: 0 '***' 0.001 '**' 0.01 '*' 0.05 '.' 0.1 ' ' 1

## Modelling: soil water 15N

df_soilwater <- read_xlsx("Your_directory/df_soil_water.xlsx")

New names:
• `` -> `...1`

df_soilwater <- df_soilwater %>%
 rename(Soil_water_µg15N_pr_m2='microgram soil water 15N exess pr m2 to 10 cm')
df_soilwater <- df_soilwater %>%
 mutate(Winter_stage=factor(Winter_stage))
df_soilwater <- df_soilwater %>%
 mutate(Site=factor(Site))
df_soilwater <- df_soilwater %>%
 mutate(Soil_water_µg15N_pr_m2=log(Soil_water_µg15N_pr_m2))

Warning: There was 1 warning in `mutate()`.
ℹ In argument: `Soil_water_µg15N_pr_m2 = log(Soil_water_µg15N_pr_m2)`.
Caused by warning in `log()`:
! NaNs produced

#CHanging the levels to zoom in on each specific site and any differences between Late Winter C and late winter WW:

df_soilwater$Site <- relevel(df_soilwater$Site, ref = "Western")
df_soilwater$Winter_stage <- relevel(df_soilwater$Winter_stage, ref = "Late_Winter_C")

soilwater_m2_model <- glmmTMB(Soil_water_µg15N_pr_m2 ~ Site * Winter_stage + (1 | Site:Winter_stage), data = df_soilwater, family = gaussian)

plot(residuals(soilwater_m2_model))


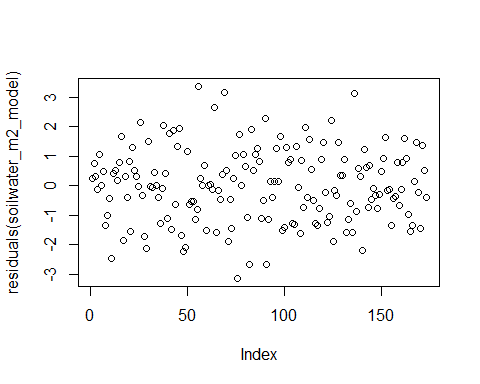


# Shapiro-Wilk test for normality
shapiro.test(residuals(soilwater_m2_model))

Shapiro-Wilk normality test

data: residuals(soilwater_m2_model)
W = 0.99509, p-value = 0.8404

#Summary
summary(soilwater_m2_model)

Family: gaussian ( identity )
Formula:
Soil_water_µg15N_pr_m2 ~ Site * Winter_stage + (1 | Site:Winter_stage)
Data: df_soilwater

 AIC BIC logLik -2*log(L) df.resid
 617.8 702.9 -281.9 563.8 146

Random effects:

Conditional model:
 Groups Name Variance Std.Dev.
 Site:Winter_stage (Intercept) 6.948e-10 2.636e-05
 Residual 1.523e+00 1.234e+00
Number of obs: 173, groups: Site:Winter_stage, 25

Dispersion estimate for gaussian family (sigma^2): 1.52

Conditional model:
 Estimate Std. Error z value
(Intercept) 11.18658 0.61709 18.128
SiteEastern -2.74569 0.87269 -3.146
SiteNorthern -2.25302 0.82791 -2.721
SiteSoutheastern -2.08472 0.94262 -2.212
SiteSouthern -3.56166 0.87269 -4.081
Winter_stageEarly_Winter -0.69264 0.73015 -0.949
Winter_stageLate_Winter_WW -2.65475 0.82791 -3.207
Winter_stageMidwinter_I -1.23952 0.73015 -1.698
Winter_stageMidwinter_II -1.77480 0.72060 -2.463
SiteEastern:Winter_stageEarly_Winter 0.82026 1.05086 0.781
SiteNorthern:Winter_stageEarly_Winter 0.08838 0.99502 0.089
SiteSoutheastern:Winter_stageEarly_Winter 0.26339 1.10961 0.237
SiteSouthern:Winter_stageEarly_Winter 0.73795 1.05086 0.702
SiteEastern:Winter_stageLate_Winter_WW 1.77121 1.25457 1.412
SiteNorthern:Winter_stageLate_Winter_WW 1.79436 1.13785 1.577
SiteSoutheastern:Winter_stageLate_Winter_WW 2.15241 1.25457 1.716
SiteSouthern:Winter_stageLate_Winter_WW 1.15142 1.20292 0.957
SiteEastern:Winter_stageMidwinter_I 1.95709 1.05086 1.862
SiteNorthern:Winter_stageMidwinter_I 2.13402 0.99502 2.145
SiteSoutheastern:Winter_stageMidwinter_I 1.63224 1.10961 1.471
SiteSouthern:Winter_stageMidwinter_I 2.28830 1.05086 2.178
SiteEastern:Winter_stageMidwinter_II 2.06333 1.04425 1.976
SiteNorthern:Winter_stageMidwinter_II 1.89307 0.98804 1.916
SiteSoutheastern:Winter_stageMidwinter_II 1.21762 1.11561 1.091
SiteSouthern:Winter_stageMidwinter_II 0.84633 1.04425 0.810
 Pr(>|z|)
(Intercept) < 2e-16 ***
SiteEastern 0.00165 **
SiteNorthern 0.00650 **
SiteSoutheastern 0.02699 *
SiteSouthern 4.48e-05 ***
Winter_stageEarly_Winter 0.34281
Winter_stageLate_Winter_WW 0.00134 **
Winter_stageMidwinter_I 0.08958 .
Winter_stageMidwinter_II 0.01378 *
SiteEastern:Winter_stageEarly_Winter 0.43506
SiteNorthern:Winter_stageEarly_Winter 0.92922
SiteSoutheastern:Winter_stageEarly_Winter 0.81237
SiteSouthern:Winter_stageEarly_Winter 0.48254
SiteEastern:Winter_stageLate_Winter_WW 0.15801
SiteNorthern:Winter_stageLate_Winter_WW 0.11480
SiteSoutheastern:Winter_stageLate_Winter_WW 0.08623 .
SiteSouthern:Winter_stageLate_Winter_WW 0.33848
SiteEastern:Winter_stageMidwinter_I 0.06255 .
SiteNorthern:Winter_stageMidwinter_I 0.03198 *
SiteSoutheastern:Winter_stageMidwinter_I 0.14129
SiteSouthern:Winter_stageMidwinter_I 0.02944 *
SiteEastern:Winter_stageMidwinter_II 0.04817 *
SiteNorthern:Winter_stageMidwinter_II 0.05537 .
SiteSoutheastern:Winter_stageMidwinter_II 0.27508
SiteSouthern:Winter_stageMidwinter_II 0.41767
---
Signif. codes: 0 '***' 0.001 '**' 0.01 '*' 0.05 '.' 0.1 ' ' 1

# Supplementary code S3: Aboveground vegetation

df_above_north <- read_xlsx("Your_directory/df_aboveground_north.xlsx")

New names:
• `` -> `...1`

df_above_east <- read_xlsx("Your_directory/df_aboveground_east.xlsx")

New names:
• `` -> `...1`

df_above_southeast <- read_xlsx("Your_directory/df_aboveground_southeast.xlsx")

New names:
• `` -> `...1`

df_above_south <- read_xlsx("Your_directory/df_aboveground_south.xlsx")

New names:
• `` -> `...1`

df_above_west <- read_xlsx("Your_directory/df_aboveground_west.xlsx")

New names:
• `` -> `...1`

df_above <- bind_rows(df_above_north,df_above_east,df_above_southeast,df_above_south, df_above_west)

df_above <- df_above %>%
 mutate(Winter_stage=factor(Winter_stage))
df_above <- df_above %>%
 mutate(Site=factor(Site))
df_above <- df_above %>%
 mutate(Stem_leaf=factor(Stem_leaf))
df_above <- df_above %>%
 mutate(PFT=factor(PFT))
df_above <- df_above %>%
 mutate(Species=factor(Species))

Fitting a model, testing for normal residuals and transforming for a better model, then fitting again.

This model tests the effect of Site, Winter stage, fraction of the plant (Stem or leaf) and Plant functional type (PFT) on aboveground 15N recovery. It also puts the intercept between site and winter stage as a random factor, taking into account the non-independence of Winter stage within each site (repeated measures) and makes PFT and Stem_leaf because we have an expectation that leaf and stem distribution of N will vary between plant functional types.

above_m2_model <- glmmTMB(g_15N_APE_pr_m2 ~ Site * Winter_stage + Stem_leaf * PFT + (1 | Site:Winter_stage), data = df_above, family = gaussian)

dropping columns from rank-deficient conditional model: SiteWestern:Winter_stageLate_Winter_C, SiteWestern:Winter_stageLate_Winter_WW, SiteWestern:Winter_stageMidwinter_I, SiteWestern:Winter_stageMidwinter_II, Stem_leafStem:PFTMoss

plot(residuals(above_m2_model))


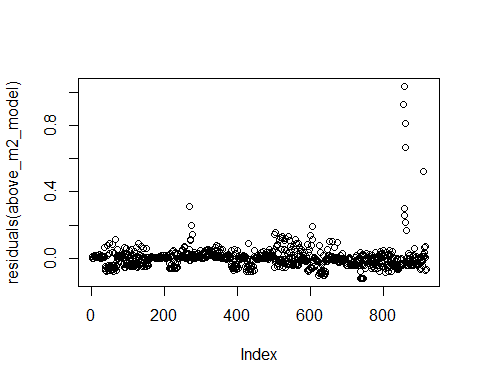


# Shapiro-Wilk test for normality
shapiro.test(residuals(above_m2_model))

Shapiro-Wilk normality test

data: residuals(above_m2_model)
W = 0.51474, p-value < 2.2e-16

print(bestNormalize(df_above$g_15N_APE_pr_m2))

Best Normalizing transformation with 917 Observations
 Estimated Normality Statistics (Pearson P / df, lower => more normal):
 - arcsinh(x): 16.5224
 - Box-Cox: 1.5963
 - Center+scale: 17.4118
 - Double Reversed Log_b(x+a): 17.3692
 - Exp(x): 17.2756
 - Log_b(x+a): 2.1011
 - orderNorm (ORQ): 1.0644
 - sqrt(x + a): 3.5743
 - Yeo-Johnson: 9.2798
Estimation method: Out-of-sample via CV with 10 folds and 5 repeats

Based off these, bestNormalize chose:
orderNorm Transformation with 917 nonmissing obs and ties
 - 901 unique values
 - Original quantiles:
 0% 25% 50% 75% 100%
0.000 0.004 0.019 0.062 1.168

print(bestNormalize(residuals(above_m2_model)))

Best Normalizing transformation with 917 Observations
 Estimated Normality Statistics (Pearson P / df, lower => more normal):
 - arcsinh(x): 6.7889
 - Center+scale: 7.1806
 - Double Reversed Log_b(x+a): 8.6863
 - Exp(x): 9.9369
 - Log_b(x+a): 6.203
 - orderNorm (ORQ): 1.079
 - sqrt(x + a): 5.2002
 - Yeo-Johnson: 3.8929
Estimation method: Out-of-sample via CV with 10 folds and 5 repeats

Based off these, bestNormalize chose:
orderNorm Transformation with 917 nonmissing obs and ties
 - 900 unique values
 - Original quantiles:
 0% 25% 50% 75% 100%
-0.123 -0.036 -0.002 0.012 1.038

#So I make the transformation:
above_data <- df_above$g_15N_APE_pr_m2

# Apply the orderNorm transformation
order_norm <- orderNorm(above_data)

Warning in orderNorm(above_data): Ties in data, Normal distribution not guaranteed

# Transformed data
df_above$g_15N_APE_pr_m2 <- order_norm$x.t

above_m2_model_PFTint <- glmmTMB(g_15N_APE_pr_m2 ~ Site * Winter_stage + Stem_leaf * PFT + (1 | Site:Winter_stage), data = df_above, family = gaussian)

dropping columns from rank-deficient conditional model: SiteWestern:Winter_stageLate_Winter_C, SiteWestern:Winter_stageLate_Winter_WW, SiteWestern:Winter_stageMidwinter_I, SiteWestern:Winter_stageMidwinter_II, Stem_leafStem:PFTMoss

plot(residuals(above_m2_model_PFTint))


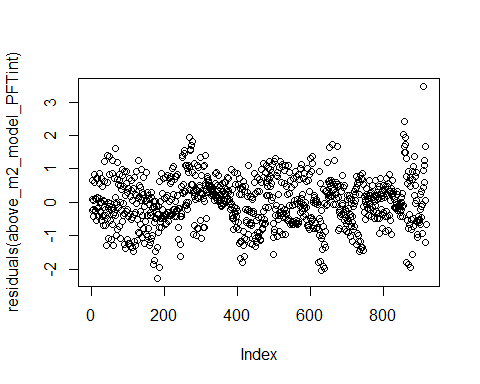


summary(above_m2_model)

Family: gaussian ( identity )
Formula:
g_15N_APE_pr_m2 ~ Site * Winter_stage + Stem_leaf * PFT + (1 |
 Site:Winter_stage)
Data: df_above

 AIC BIC logLik -2*log(L) df.resid
 -2087.2 -1957.0 1070.6 -2141.2 890

Random effects:

Conditional model:
 Groups Name Variance Std.Dev.
 Site:Winter_stage (Intercept) 1.104e-12 1.051e-06
 Residual 5.668e-03 7.529e-02
Number of obs: 917, groups: Site:Winter_stage, 21

Dispersion estimate for gaussian family (sigma^2): 0.00567

Conditional model:
 Estimate Std. Error z value
(Intercept) 0.0023870 0.0126658 0.188
SiteNorthern 0.0030087 0.0151754 0.198
SiteSoutheastern 0.0251212 0.0168691 1.489
SiteSouthern 0.0447533 0.0169052 2.647
SiteWestern -0.0037848 0.0190089 -0.199
Winter_stageLate_Winter_C -0.0000717 0.0175135 -0.004
Winter_stageLate_Winter_WW 0.0015088 0.0172771 0.087
Winter_stageMidwinter_I 0.0089478 0.0175135 0.511
Winter_stageMidwinter_II 0.0032143 0.0175135 0.184
Stem_leafStem 0.0811325 0.0069811 11.622
PFTEvergreen 0.0513047 0.0077817 6.593
PFTMoss -0.0009492 0.0078576 -0.121
SiteNorthern:Winter_stageLate_Winter_C -0.0019508 0.0217900 -0.090
SiteSoutheastern:Winter_stageLate_Winter_C -0.0033529 0.0245742 -0.136
SiteSouthern:Winter_stageLate_Winter_C -0.0005649 0.0245706 -0.023
SiteWestern:Winter_stageLate_Winter_C NA NA NA
SiteNorthern:Winter_stageLate_Winter_WW -0.0094859 0.0219288 -0.433
SiteSoutheastern:Winter_stageLate_Winter_WW -0.0056453 0.0240582 -0.235
SiteSouthern:Winter_stageLate_Winter_WW -0.0016822 0.0244048 -0.069
SiteWestern:Winter_stageLate_Winter_WW NA NA NA
SiteNorthern:Winter_stageMidwinter_I -0.0172337 0.0217952 -0.791
SiteSoutheastern:Winter_stageMidwinter_I -0.0258553 0.0240801 -1.074
SiteSouthern:Winter_stageMidwinter_I -0.0484489 0.0241564 -2.006
SiteWestern:Winter_stageMidwinter_I NA NA NA
SiteNorthern:Winter_stageMidwinter_II -0.0103692 0.0219568 -0.472
SiteSoutheastern:Winter_stageMidwinter_II -0.0132184 0.0242277 -0.546
SiteSouthern:Winter_stageMidwinter_II -0.0021030 0.0240133 -0.088
SiteWestern:Winter_stageMidwinter_II NA NA NA
Stem_leafStem:PFTEvergreen -0.0785429 0.0114225 -6.876
Stem_leafStem:PFTMoss NA NA NA
 Pr(>|z|)
(Intercept) 0.85052
SiteNorthern 0.84284
SiteSoutheastern 0.13644
SiteSouthern 0.00811 **
SiteWestern 0.84218
Winter_stageLate_Winter_C 0.99673
Winter_stageLate_Winter_WW 0.93041
Winter_stageMidwinter_I 0.60942
Winter_stageMidwinter_II 0.85438
Stem_leafStem < 2e-16 ***
PFTEvergreen 4.31e-11 ***
PFTMoss 0.90385
SiteNorthern:Winter_stageLate_Winter_C 0.92866
SiteSoutheastern:Winter_stageLate_Winter_C 0.89147
SiteSouthern:Winter_stageLate_Winter_C 0.98166
SiteWestern:Winter_stageLate_Winter_C NA
SiteNorthern:Winter_stageLate_Winter_WW 0.66532
SiteSoutheastern:Winter_stageLate_Winter_WW 0.81448
SiteSouthern:Winter_stageLate_Winter_WW 0.94505
SiteWestern:Winter_stageLate_Winter_WW NA
SiteNorthern:Winter_stageMidwinter_I 0.42911
SiteSoutheastern:Winter_stageMidwinter_I 0.28295
SiteSouthern:Winter_stageMidwinter_I 0.04490 *
SiteWestern:Winter_stageMidwinter_I NA
SiteNorthern:Winter_stageMidwinter_II 0.63675
SiteSoutheastern:Winter_stageMidwinter_II 0.58535
SiteSouthern:Winter_stageMidwinter_II 0.93021
SiteWestern:Winter_stageMidwinter_II NA
Stem_leafStem:PFTEvergreen 6.15e-12 ***
Stem_leafStem:PFTMoss NA
---
Signif. codes: 0 '***' 0.001 '**' 0.01 '*' 0.05 '.' 0.1 ' ' 1

#If you want to try different sites or PFTs as baselevel, run variations of the below code snippets in the console and then run this chunk again:

#df_above$Site <- relevel(df_above$Site, ref = "Southern")
#df_above$PFT <- relevel(df_above$PFT, ref = "Evergreen")
#df_above$Winter_stage <- relevel(df_above$Winter_stage, ref = "Late_Winter_C")
#df_above$Species <- relevel(df_above$Species, ref = "Grass")

#Removing Moslyng and Western in order to make estimated marginal means

df_above <- subset(df_above, Species != "Moslyng")

df_above <-subset(df_above, Site != "Western")

df_above <-subset(df_above, PFT != "Moss")

df_above <- droplevels(df_above)

#Rerunning the model with those conditions

above_m2_model_PFTint <- glmmTMB(g_15N_APE_pr_m2 ~ Site * Winter_stage + Stem_leaf * PFT + (1 | Site:Winter_stage), data = df_above, family = gaussian)

#Now we get the estimated marginal means of WInter stage

emm_winterstages <- emmeans(above_m2_model_PFTint, ~Winter_stage|Site, type = 'response')

emm_winterstages

‘> emm_winterstages

Site = Eastern:

Winter_stage emmean SE df lower.CL upper.CL

Early_Winter 0.12778 0.1250 733 -0.11798 0.374

Late_Winter_C 0.25440 0.1250 733 0.00865 0.500

Late_Winter_WW 0.19769 0.1220 733 -0.04108 0.436

Midwinter_I 0.33615 0.1250 733 0.09040 0.582

Midwinter_II 0.20709 0.1250 733 -0.03866 0.453

Site = Northern:

Winter_stage emmean SE df lower.CL upper.CL

Early_Winter 0.18950 0.0946 733 0.00381 0.375

Late_Winter_C 0.18739 0.0946 733 0.00170 0.373

Late_Winter_WW -0.09231 0.1020 733 -0.29327 0.109

Midwinter_I 0.03651 0.0986 733 -0.15710 0.230

Midwinter_II -0.00793 0.0986 733 -0.20154 0.186

Site = Southeastern:

Winter_stage emmean SE df lower.CL upper.CL

Early_Winter 0.67107 0.1150 733 0.44595 0.896

Late_Winter_C 0.63290 0.1250 733 0.38754 0.878

Late_Winter_WW 0.60485 0.1180 733 0.37383 0.836

Midwinter_I 0.51132 0.1150 733 0.28620 0.736

Midwinter_II 0.54504 0.1180 733 0.31403 0.776

Site = Southern:

Winter_stage emmean SE df lower.CL upper.CL

Early_Winter 0.67549 0.1270 733 0.42697 0.924

Late_Winter_C 0.61619 0.1310 733 0.35926 0.873

Late_Winter_WW 0.64128 0.1290 733 0.38868 0.894

Midwinter_I 0.38519 0.1310 733 0.12800 0.642

Midwinter_II 0.64232 0.1270 733 0.39380 0.891

Results are averaged over the levels of: Stem_leaf, PFT

Confidence level used: 0.95

‘

#And then a post-hoc test between stages (Tukey test)

pairs(emm_winterstages, adjust = "tukey")

‘

> pairs(emm_winterstages, adjust = "tukey")

Site = Eastern:

contrast estimate SE df t.ratio p.value

Early_Winter - Late_Winter_C -0.12662 0.176 733 -0.719 0.9522

Early_Winter - Late_Winter_WW -0.06991 0.174 733 -0.403 0.9945

Early_Winter - Midwinter_I -0.20837 0.176 733 -1.183 0.7612

Early_Winter - Midwinter_II -0.07931 0.176 733 -0.450 0.9915

Late_Winter_C - Late_Winter_WW 0.05671 0.174 733 0.327 0.9975

Late_Winter_C - Midwinter_I -0.08175 0.176 733 -0.464 0.9905

Late_Winter_C - Midwinter_II 0.04731 0.176 733 0.269 0.9989

Late_Winter_WW - Midwinter_I -0.13846 0.174 733 -0.798 0.9312

Late_Winter_WW - Midwinter_II -0.00941 0.174 733 -0.054 1.0000

Midwinter_I - Midwinter_II 0.12906 0.176 733 0.733 0.9488

Site = Northern:

contrast estimate SE df t.ratio p.value

Early_Winter - Late_Winter_C 0.00211 0.132 733 0.016 1.0000

Early_Winter - Late_Winter_WW 0.28181 0.138 733 2.040 0.2477

Early_Winter - Midwinter_I 0.15299 0.135 733 1.132 0.7895

Early_Winter - Midwinter_II 0.19743 0.135 733 1.461 0.5882

Late_Winter_C - Late_Winter_WW 0.27970 0.138 733 2.025 0.2549

Late_Winter_C - Midwinter_I 0.15088 0.135 733 1.117 0.7979

Late_Winter_C - Midwinter_II 0.19532 0.135 733 1.445 0.5984

Late_Winter_WW - Midwinter_I -0.12882 0.141 733 -0.913 0.8918

Late_Winter_WW - Midwinter_II -0.08438 0.141 733 -0.598 0.9753

Midwinter_I - Midwinter_II 0.04444 0.138 733 0.322 0.9977

Site = Southeastern:

contrast estimate SE df t.ratio p.value

Early_Winter - Late_Winter_C 0.03816 0.169 733 0.226 0.9994

Early_Winter - Late_Winter_WW 0.06622 0.164 733 0.404 0.9944

Early_Winter - Midwinter_I 0.15975 0.162 733 0.988 0.8606

Early_Winter - Midwinter_II 0.12603 0.164 733 0.769 0.9394

Late_Winter_C - Late_Winter_WW 0.02806 0.171 733 0.164 0.9998

Late_Winter_C - Midwinter_I 0.12159 0.169 733 0.719 0.9522

Late_Winter_C - Midwinter_II 0.08787 0.171 733 0.513 0.9861

Late_Winter_WW - Midwinter_I 0.09353 0.164 733 0.571 0.9793

Late_Winter_WW - Midwinter_II 0.05981 0.166 733 0.360 0.9964

Midwinter_I - Midwinter_II -0.03372 0.164 733 -0.206 0.9996

Site = Southern:

contrast estimate SE df t.ratio p.value

Early_Winter - Late_Winter_C 0.05930 0.182 733 0.326 0.9976

Early_Winter - Late_Winter_WW 0.03421 0.180 733 0.190 0.9997

Early_Winter - Midwinter_I 0.29030 0.182 733 1.595 0.5013

Early_Winter - Midwinter_II 0.03317 0.179 733 0.185 0.9997

Late_Winter_C - Late_Winter_WW -0.02510 0.183 733 -0.137 0.9999

Late_Winter_C - Midwinter_I 0.23099 0.185 733 1.248 0.7231

Late_Winter_C - Midwinter_II -0.02613 0.182 733 -0.144 0.9999

Late_Winter_WW - Midwinter_I 0.25609 0.184 733 1.395 0.6308

Late_Winter_WW - Midwinter_II -0.00103 0.180 733 -0.006 1.0000

Midwinter_I - Midwinter_II -0.25712 0.182 733 -1.412 0.6199

Results are averaged over the levels of: Stem_leaf, PFT

P value adjustment: tukey method for comparing a family of 5 estimates ’

## Modelling: Species-specific N uptake

Fitting the model species-specifically across Stem_leaf, Site and Winter stage, based on the unit mass, with Salix as the baselevel. We take out PFT because it will not add anything now that we include Species, and we include interaction between Species and Stem_leaf (fraction) because we expect the distribution of leaf and stem to be different between species.

It turns out that Moslyng has only 1 data point, so I exclude that to be able to estimate marginal means. Further, Western site has only one time point, which makes the model destabilize at this level of detail, so if I want to estimate marginal means, I need to take Western out of the model.

df_above_species <- subset(df_above, Species != "Moslyng")
df_above_species <-subset(df_above_species, Site != "Western")

Fitting the model per unit area (g 15N excess pr m2) with Empetrum as baselevel:

df_above$Species <- relevel(df_above$Species, ref = "Empetrum")

above_m2_model_species <- glmmTMB(g_15N_APE_pr_m2 ~ Site * Winter_stage + Stem_leaf * Species + (1 | Site:Winter_stage), data = df_above, family = gaussian)

dropping columns from rank-deficient conditional model: SiteWestern:Winter_stageLate_Winter_C, SiteWestern:Winter_stageLate_Winter_WW, SiteWestern:Winter_stageMidwinter_I, SiteWestern:Winter_stageMidwinter_II, Stem_leafStem:SpeciesDryas, Stem_leafStem:SpeciesGrass, Stem_leafStem:SpeciesLichen, Stem_leafStem:SpeciesMoss, Stem_leafStem:SpeciesPileurt, Stem_leafStem:SpeciesSalix herbacea

summary(above_m2_model_species)

Family: gaussian ( identity )
Formula:
g_15N_APE_pr_m2 ~ Site * Winter_stage + Stem_leaf * Species +
 (1 | Site:Winter_stage)
Data: df_above

 AIC BIC logLik -2*log(L) df.resid
 1898.2 2081.4 -911.1 1822.2 879

Random effects:

Conditional model:
 Groups Name Variance Std.Dev.
 Site:Winter_stage (Intercept) 1.011e-10 1.005e-05
 Residual 4.271e-01 6.535e-01
Number of obs: 917, groups: Site:Winter_stage, 21

Dispersion estimate for gaussian family (sigma^2): 0.427

Conditional model:
 Estimate Std. Error z value
(Intercept) 0.54216 0.12439 4.358
SiteNorthern 0.08520 0.13605 0.626
SiteSoutheastern 0.47368 0.14686 3.225
SiteSouthern 0.37136 0.14792 2.510
SiteWestern -0.14491 0.16568 -0.875
Winter_stageLate_Winter_C 0.16334 0.15212 1.074
Winter_stageLate_Winter_WW 0.12828 0.15044 0.853
Winter_stageMidwinter_I 0.21414 0.15212 1.408
Winter_stageMidwinter_II 0.14411 0.15212 0.947
Stem_leafStem 0.01687 0.09134 0.185
SpeciesBetula -1.20372 0.15997 -7.525
SpeciesCassiope -0.48460 0.13594 -3.565
SpeciesDryas -0.59985 0.22868 -2.623
SpeciesGrass -1.17816 0.09715 -12.127
SpeciesLichen -1.84447 0.13013 -14.174
SpeciesMoss -1.16127 0.09635 -12.053
SpeciesPileurt -2.11202 0.14783 -14.287
SpeciesSalix -1.57460 0.10372 -15.181
SpeciesSalix herbacea -1.58831 0.21913 -7.248
SpeciesVaccinum -1.25381 0.09924 -12.634
SiteNorthern:Winter_stageLate_Winter_C -0.16856 0.18917 -0.891
SiteSoutheastern:Winter_stageLate_Winter_C -0.18009 0.21365 -0.843
SiteSouthern:Winter_stageLate_Winter_C -0.18443 0.21369 -0.863
SiteWestern:Winter_stageLate_Winter_C NA NA NA
SiteNorthern:Winter_stageLate_Winter_WW -0.27633 0.19136 -1.444
SiteSoutheastern:Winter_stageLate_Winter_WW -0.19053 0.20988 -0.908
SiteSouthern:Winter_stageLate_Winter_WW -0.17988 0.21268 -0.846
SiteWestern:Winter_stageLate_Winter_WW NA NA NA
SiteNorthern:Winter_stageMidwinter_I -0.34069 0.18987 -1.794
SiteSoutheastern:Winter_stageMidwinter_I -0.35064 0.20904 -1.677
SiteSouthern:Winter_stageMidwinter_I -0.42441 0.20987 -2.022
SiteWestern:Winter_stageMidwinter_I NA NA NA
SiteNorthern:Winter_stageMidwinter_II -0.24186 0.19123 -1.265
SiteSoutheastern:Winter_stageMidwinter_II -0.27280 0.21055 -1.296
SiteSouthern:Winter_stageMidwinter_II -0.20647 0.20851 -0.990
SiteWestern:Winter_stageMidwinter_II NA NA NA
Stem_leafStem:SpeciesBetula 2.42911 0.22641 10.729
Stem_leafStem:SpeciesCassiope 0.20945 0.17858 1.173
Stem_leafStem:SpeciesDryas NA NA NA
Stem_leafStem:SpeciesGrass NA NA NA
Stem_leafStem:SpeciesLichen NA NA NA
Stem_leafStem:SpeciesMoss NA NA NA
Stem_leafStem:SpeciesPileurt NA NA NA
Stem_leafStem:SpeciesSalix 1.20797 0.13960 8.653
Stem_leafStem:SpeciesSalix herbacea NA NA NA
Stem_leafStem:SpeciesVaccinum 1.15296 0.13572 8.495
 Pr(>|z|)
(Intercept) 1.31e-05 ***
SiteNorthern 0.531170
SiteSoutheastern 0.001258 **
SiteSouthern 0.012056 *
SiteWestern 0.381775
Winter_stageLate_Winter_C 0.282925
Winter_stageLate_Winter_WW 0.393837
Winter_stageMidwinter_I 0.159200
Winter_stageMidwinter_II 0.343437
Stem_leafStem 0.853471
SpeciesBetula 5.28e-14 ***
SpeciesCassiope 0.000364 ***
SpeciesDryas 0.008713 **
SpeciesGrass < 2e-16 ***
SpeciesLichen < 2e-16 ***
SpeciesMoss < 2e-16 ***
SpeciesPileurt < 2e-16 ***
SpeciesSalix < 2e-16 ***
SpeciesSalix herbacea 4.22e-13 ***
SpeciesVaccinum < 2e-16 ***
SiteNorthern:Winter_stageLate_Winter_C 0.372886
SiteSoutheastern:Winter_stageLate_Winter_C 0.399286
SiteSouthern:Winter_stageLate_Winter_C 0.388085
SiteWestern:Winter_stageLate_Winter_C NA
SiteNorthern:Winter_stageLate_Winter_WW 0.148732
SiteSoutheastern:Winter_stageLate_Winter_WW 0.363996
SiteSouthern:Winter_stageLate_Winter_WW 0.397656
SiteWestern:Winter_stageLate_Winter_WW NA
SiteNorthern:Winter_stageMidwinter_I 0.072755 .
SiteSoutheastern:Winter_stageMidwinter_I 0.093471 .
SiteSouthern:Winter_stageMidwinter_I 0.043147 *
SiteWestern:Winter_stageMidwinter_I NA
SiteNorthern:Winter_stageMidwinter_II 0.205957
SiteSoutheastern:Winter_stageMidwinter_II 0.195099
SiteSouthern:Winter_stageMidwinter_II 0.322072
SiteWestern:Winter_stageMidwinter_II NA
Stem_leafStem:SpeciesBetula < 2e-16 ***
Stem_leafStem:SpeciesCassiope 0.240839
Stem_leafStem:SpeciesDryas NA
Stem_leafStem:SpeciesGrass NA
Stem_leafStem:SpeciesLichen NA
Stem_leafStem:SpeciesMoss NA
Stem_leafStem:SpeciesPileurt NA
Stem_leafStem:SpeciesSalix < 2e-16 ***
Stem_leafStem:SpeciesSalix herbacea NA
Stem_leafStem:SpeciesVaccinum < 2e-16 ***
---
Signif. codes: 0 '***' 0.001 '**' 0.01 '*' 0.05 '.' 0.1 ' ' 1

Fitting the model per unit biomass (mg 15N excess per g dryweight biomass).

df_above_species$Species <- relevel(df_above_species$Species, ref = "Salix")

above_gdryweight_model_species_fraction <- glmmTMB(
 mg_15NAPE_per_g_dryweight_biomass ~ Site * Winter_stage + Species * Stem_leaf + (1 | Site:Winter_stage),
 data = df_above_species,
 family = gaussian
)

dropping columns from rank-deficient conditional model: SpeciesDryas:Stem_leafStem, SpeciesGrass:Stem_leafStem, SpeciesLichen:Stem_leafStem, SpeciesMoss:Stem_leafStem, SpeciesPileurt:Stem_leafStem, SpeciesSalix herbacea:Stem_leafStem

Warning in finalizeTMB(TMBStruc, obj, fit, h, data.tmb.old): Model convergence
problem; function evaluation limit reached without convergence (9). See
vignette('troubleshooting'), help('diagnose')

summary(above_gdryweight_model_species_fraction)

Family: gaussian ( identity )
Formula:
mg_15NAPE_per_g_dryweight_biomass ~ Site * Winter_stage + Species *
 Stem_leaf + (1 | Site:Winter_stage)
Data: df_above_species

 AIC BIC logLik -2*log(L) df.resid
 -2240.8 -2063.6 1157.4 -2314.8 853

Random effects:

Conditional model:
 Groups Name Variance Std.Dev.
 Site:Winter_stage (Intercept) 1.658e-06 0.001288
 Residual 4.345e-03 0.065919
Number of obs: 890, groups: Site:Winter_stage, 20

Dispersion estimate for gaussian family (sigma^2): 0.00435

Conditional model:
 Estimate Std. Error z value
(Intercept) 0.32526 0.01310 24.823
SiteNorthern 0.06094 0.01386 4.397
SiteSoutheastern 0.05948 0.01493 3.985
SiteSouthern 0.06530 0.01504 4.343
Winter_stageLate_Winter_C 0.04607 0.01545 2.981
Winter_stageLate_Winter_WW 0.04017 0.01528 2.628
Winter_stageMidwinter_I 0.06388 0.01545 4.134
Winter_stageMidwinter_II 0.02148 0.01545 1.390
SpeciesBetula -0.10731 0.01693 -6.341
SpeciesCassiope -0.11477 0.01417 -8.102
SpeciesDryas -0.15337 0.02305 -6.653
SpeciesEmpetrum -0.15911 0.01068 -14.900
SpeciesGrass -0.10947 0.01062 -10.304
SpeciesLichen -0.28095 0.01391 -20.196
SpeciesMoss -0.23307 0.01042 -22.374
SpeciesPileurt -0.15069 0.01488 -10.128
SpeciesSalix herbacea -0.09065 0.02265 -4.003
SpeciesVaccinum -0.17633 0.01065 -16.562
Stem_leafStem -0.10185 0.01079 -9.436
SiteNorthern:Winter_stageLate_Winter_C -0.04699 0.01925 -2.440
SiteSoutheastern:Winter_stageLate_Winter_C -0.03051 0.02170 -1.406
SiteSouthern:Winter_stageLate_Winter_C -0.05302 0.02171 -2.442
SiteNorthern:Winter_stageLate_Winter_WW -0.09343 0.01947 -4.798
SiteSoutheastern:Winter_stageLate_Winter_WW -0.04377 0.02133 -2.052
SiteSouthern:Winter_stageLate_Winter_WW -0.04859 0.02161 -2.249
SiteNorthern:Winter_stageMidwinter_I -0.10100 0.01932 -5.227
SiteSoutheastern:Winter_stageMidwinter_I -0.07426 0.02124 -3.496
SiteSouthern:Winter_stageMidwinter_I -0.11141 0.02133 -5.224
SiteNorthern:Winter_stageMidwinter_II -0.06608 0.01946 -3.396
SiteSoutheastern:Winter_stageMidwinter_II -0.04138 0.02139 -1.934
SiteSouthern:Winter_stageMidwinter_II -0.03876 0.02119 -1.829
SpeciesBetula:Stem_leafStem 0.13265 0.02401 5.524
SpeciesCassiope:Stem_leafStem 0.06020 0.01910 3.152
SpeciesDryas:Stem_leafStem NA NA NA
SpeciesEmpetrum:Stem_leafStem 0.04943 0.01434 3.446
SpeciesGrass:Stem_leafStem NA NA NA
SpeciesLichen:Stem_leafStem NA NA NA
SpeciesMoss:Stem_leafStem NA NA NA
SpeciesPileurt:Stem_leafStem NA NA NA
SpeciesSalix herbacea:Stem_leafStem NA NA NA
SpeciesVaccinum:Stem_leafStem 0.15289 0.01489 10.268
 Pr(>|z|)
(Intercept) < 2e-16 ***
SiteNorthern 1.10e-05 ***
SiteSoutheastern 6.75e-05 ***
SiteSouthern 1.40e-05 ***
Winter_stageLate_Winter_C 0.002870 **
Winter_stageLate_Winter_WW 0.008584 **
Winter_stageMidwinter_I 3.56e-05 ***
Winter_stageMidwinter_II 0.164428
SpeciesBetula 2.29e-10 ***
SpeciesCassiope 5.40e-16 ***
SpeciesDryas 2.88e-11 ***
SpeciesEmpetrum < 2e-16 ***
SpeciesGrass < 2e-16 ***
SpeciesLichen < 2e-16 ***
SpeciesMoss < 2e-16 ***
SpeciesPileurt < 2e-16 ***
SpeciesSalix herbacea 6.26e-05 ***
SpeciesVaccinum < 2e-16 ***
Stem_leafStem < 2e-16 ***
SiteNorthern:Winter_stageLate_Winter_C 0.014672 *
SiteSoutheastern:Winter_stageLate_Winter_C 0.159833
SiteSouthern:Winter_stageLate_Winter_C 0.014596 *
SiteNorthern:Winter_stageLate_Winter_WW 1.61e-06 ***
SiteSoutheastern:Winter_stageLate_Winter_WW 0.040134 *
SiteSouthern:Winter_stageLate_Winter_WW 0.024509 *
SiteNorthern:Winter_stageMidwinter_I 1.72e-07 ***
SiteSoutheastern:Winter_stageMidwinter_I 0.000473 ***
SiteSouthern:Winter_stageMidwinter_I 1.75e-07 ***
SiteNorthern:Winter_stageMidwinter_II 0.000684 ***
SiteSoutheastern:Winter_stageMidwinter_II 0.053112 .
SiteSouthern:Winter_stageMidwinter_II 0.067397 .
SpeciesBetula:Stem_leafStem 3.30e-08 ***
SpeciesCassiope:Stem_leafStem 0.001623 **
SpeciesDryas:Stem_leafStem NA
SpeciesEmpetrum:Stem_leafStem 0.000568 ***
SpeciesGrass:Stem_leafStem NA
SpeciesLichen:Stem_leafStem NA
SpeciesMoss:Stem_leafStem NA
SpeciesPileurt:Stem_leafStem NA
SpeciesSalix herbacea:Stem_leafStem NA
SpeciesVaccinum:Stem_leafStem < 2e-16 ***
---
Signif. codes: 0 '***' 0.001 '**' 0.01 '*' 0.05 '.' 0.1 ' ' 1

I then get the estimated marginal means and do a pairwise comparison between all species (Tukey’s adjusted).

em_species_fraction <- emmeans(above_gdryweight_model_species_fraction, ~ Species | Stem_leaf)

em_species_fraction_df <- as.data.frame(em_species_fraction)

#Pairwise comparisons with Tukey adjustment
pairwise_species_fraction <- pairs(em_species_fraction, adjust = "tukey", specs = ~ Species | Stem_leaf)

pairwise_df_fraction <- as.data.frame(pairwise_species_fraction)

pairwise_df_fraction

Stem_leaf = Leaf:
 contrast estimate SE df t.ratio p.value
 Salix - Betula 0.10731401 0.016925018 853 6.341 <.0001
 Salix - Cassiope 0.11476910 0.014165329 853 8.102 <.0001
 Salix - Dryas 0.15336707 0.023053996 853 6.653 <.0001
 Salix - Empetrum 0.15911030 0.010678380 853 14.900 <.0001
 Salix - Grass 0.10947197 0.010624202 853 10.304 <.0001
 Salix - Lichen 0.28094715 0.013911166 853 20.196 <.0001
 Salix - Moss 0.23306630 0.010416868 853 22.374 <.0001
 Salix - Pileurt 0.15068561 0.014877784 853 10.128 <.0001
 Salix - Salix herbacea 0.09065034 0.022646594 853 4.003 0.0033
 Salix - Vaccinum 0.17633129 0.010646901 853 16.562 <.0001
 Betula - Cassiope 0.00745509 0.018829735 853 0.396 1.0000
 Betula - Dryas 0.04605306 0.026182557 853 1.759 0.8039
 Betula - Empetrum 0.05179629 0.016559168 853 3.128 0.0671
 Betula - Grass 0.00215795 0.016739166 853 0.129 1.0000
 Betula - Lichen 0.17363313 0.018478593 853 9.396 <.0001
 Betula - Moss 0.12575229 0.016355852 853 7.689 <.0001
 Betula - Pileurt 0.04337159 0.019371391 853 2.239 0.4776
 Betula - Salix herbacea -0.01666368 0.025947661 853 -0.642 0.9999
 Betula - Vaccinum 0.06901727 0.016590063 853 4.160 0.0017
 Cassiope - Dryas 0.03859797 0.024081388 853 1.603 0.8811
 Cassiope - Empetrum 0.04434120 0.014329066 853 3.094 0.0738
 Cassiope - Grass -0.00529713 0.014063223 853 -0.377 1.0000
 Cassiope - Lichen 0.16617805 0.016487273 853 10.079 <.0001
 Cassiope - Moss 0.11829720 0.013478198 853 8.777 <.0001
 Cassiope - Pileurt 0.03591651 0.016401089 853 2.190 0.5127
 Cassiope - Salix herbacea -0.02411876 0.024575392 853 -0.981 0.9964
 Cassiope - Vaccinum 0.06156219 0.013689893 853 4.497 0.0004
 Dryas - Empetrum 0.00574323 0.023145023 853 0.248 1.0000
 Dryas - Grass -0.04389510 0.022956908 853 -1.912 0.7094
 Dryas - Lichen 0.12758008 0.024503769 853 5.207 <.0001
 Dryas - Moss 0.07969923 0.022639913 853 3.520 0.0195
 Dryas - Pileurt -0.00268146 0.024507250 853 -0.109 1.0000
 Dryas - Salix herbacea -0.06271674 0.030566288 853 -2.052 0.6123
 Dryas - Vaccinum 0.02296421 0.022766386 853 1.009 0.9955
 Empetrum - Grass -0.04963833 0.009947966 853 -4.990 <.0001
 Empetrum - Lichen 0.12183685 0.013207060 853 9.225 <.0001
 Empetrum - Moss 0.07395600 0.009941569 853 7.439 <.0001
 Empetrum - Pileurt -0.00842469 0.015033765 853 -0.560 1.0000
 Empetrum - Salix herbacea -0.06845996 0.022145621 853 -3.091 0.0745
 Empetrum - Vaccinum 0.01722099 0.010211209 853 1.686 0.8424
 Grass - Lichen 0.17147518 0.013596736 853 12.611 <.0001
 Grass - Moss 0.12359433 0.009923969 853 12.454 <.0001
 Grass - Pileurt 0.04121364 0.014780601 853 2.788 0.1642
 Grass - Salix herbacea -0.01882163 0.022311761 853 -0.844 0.9990
 Grass - Vaccinum 0.06685932 0.010123228 853 6.605 <.0001
 Lichen - Moss -0.04788085 0.013252864 853 -3.613 0.0142
 Lichen - Pileurt -0.13026154 0.017103281 853 -7.616 <.0001
 Lichen - Salix herbacea -0.19029681 0.023876614 853 -7.970 <.0001
 Lichen - Vaccinum -0.10461586 0.013537300 853 -7.728 <.0001
 Moss - Pileurt -0.08238069 0.014225112 853 -5.791 <.0001
 Moss - Salix herbacea -0.14241596 0.022316185 853 -6.382 <.0001
 Moss - Vaccinum -0.05673501 0.009873519 853 -5.746 <.0001
 Pileurt - Salix herbacea -0.06003527 0.024992836 853 -2.402 0.3664
 Pileurt - Vaccinum 0.02564568 0.014425850 853 1.778 0.7932
 Salix herbacea - Vaccinum 0.08568095 0.022428520 853 3.820 0.0067

Stem_leaf = Stem:
 contrast estimate SE df t.ratio p.value
 Salix - Betula -0.02533175 0.017468421 853 -1.450 0.5953
 Salix - Cassiope 0.05456995 0.013969128 853 3.906 0.0010
 Salix - Dryas nonEst NA NA NA NA
 Salix - Empetrum 0.10967937 0.010136126 853 10.821 <.0001
 Salix - Grass nonEst NA NA NA NA
 Salix - Lichen nonEst NA NA NA NA
 Salix - Moss nonEst NA NA NA NA
 Salix - Pileurt nonEst NA NA NA NA
 Salix - Salix herbacea nonEst NA NA NA NA
 Salix - Vaccinum 0.02344490 0.010429151 853 2.248 0.1632
 Betula - Cassiope 0.07990170 0.019418929 853 4.115 0.0004
 Betula - Dryas nonEst NA NA NA NA
 Betula - Empetrum 0.13501112 0.017283989 853 7.811 <.0001
 Betula - Grass nonEst NA NA NA NA
 Betula - Lichen nonEst NA NA NA NA
 Betula - Moss nonEst NA NA NA NA
 Betula - Pileurt nonEst NA NA NA NA
 Betula - Salix herbacea nonEst NA NA NA NA
 Betula - Vaccinum 0.04877665 0.017379141 853 2.807 0.0408
 Cassiope - Dryas nonEst NA NA NA NA
 Cassiope - Empetrum 0.05510943 0.014234834 853 3.871 0.0011
 Cassiope - Grass nonEst NA NA NA NA
 Cassiope - Lichen nonEst NA NA NA NA
 Cassiope - Moss nonEst NA NA NA NA
 Cassiope - Pileurt nonEst NA NA NA NA
 Cassiope - Salix herbacea nonEst NA NA NA NA
 Cassiope - Vaccinum -0.03112504 0.013755576 853 -2.263 0.1582
 Dryas - Empetrum nonEst NA NA NA NA
 Dryas - Grass nonEst NA NA NA NA
 Dryas - Lichen nonEst NA NA NA NA
 Dryas - Moss nonEst NA NA NA NA
 Dryas - Pileurt nonEst NA NA NA NA
 Dryas - Salix herbacea nonEst NA NA NA NA
 Dryas - Vaccinum nonEst NA NA NA NA
 Empetrum - Grass nonEst NA NA NA NA
 Empetrum - Lichen nonEst NA NA NA NA
 Empetrum - Moss nonEst NA NA NA NA
 Empetrum - Pileurt nonEst NA NA NA NA
 Empetrum - Salix herbacea nonEst NA NA NA NA
 Empetrum - Vaccinum -0.08623447 0.010244896 853 -8.417 <.0001
 Grass - Lichen nonEst NA NA NA NA
 Grass - Moss nonEst NA NA NA NA
 Grass - Pileurt nonEst NA NA NA NA
 Grass - Salix herbacea nonEst NA NA NA NA
 Grass - Vaccinum nonEst NA NA NA NA
 Lichen - Moss nonEst NA NA NA NA
 Lichen - Pileurt nonEst NA NA NA NA
 Lichen - Salix herbacea nonEst NA NA NA NA
 Lichen - Vaccinum nonEst NA NA NA NA
 Moss - Pileurt nonEst NA NA NA NA
 Moss - Salix herbacea nonEst NA NA NA NA
 Moss - Vaccinum nonEst NA NA NA NA
 Pileurt - Salix herbacea nonEst NA NA NA NA
 Pileurt - Vaccinum nonEst NA NA NA NA
 Salix herbacea - Vaccinum nonEst NA NA NA NA

Results are averaged over the levels of: Site, Winter_stage
P value adjustment: tukey method for varying family sizes
