# Supplementary material
Source: Research Square preprint supplement (doi:10.21203/rs.3.rs-9353987/v1)
Supplement: Supplementary file 1 [file 25932f921b30cb5367493f3b.xlsx]

## Sheet: Sheet1
	Site	ID	Mesocosm	Winter_stage	Fum	GWC sample fresh soil	mgN pr g DW soil	mgC in soil extr	microg N pr g DW soil (IRMS)	microg C pr g DW soil (IRMS)	C/N in extract or peach	δ15Nkorr	Nat abun 15N	atom% (15N)	APE% 15N	gDW_soil_extracted	15N in N	δ13Ckorr	Total_dryweight_g_soil	BD_soil	Height_mesocosm	microgram_15N_pr_g_Dryweight_soil	microgram soil water 15N exess pr m2 to 10 cm	Recovery_if_scaled_to_m2_to_10cm_depth
216	Northern	Y1	Y1	Early_Winter	Non-fum	54.3702	0.0311748	0.346322	31.1748	346.322	11.109	8116.01	0.3668	3.24239	2.87549	4.64512	28754.9	-26.2222	1107.23	0.462506	5.975	0.896429	24772.6	5.89823
217	Northern	Y2	Y2	Early_Winter	Non-fum	61.0984	0.0317247	0.442861	31.7247	442.861	13.9595	590.557	0.3668	0.58129	0.21439	3.89794	2143.9	-26.1481	390.086	0.376303	3.725	0.0680145	953.38	0.226995
218	Northern	Y3	Y3	Early_Winter	Non-fum	44.7109	0.0355566	0.43325	35.5566	433.25	12.1848	7040.64	0.3668	2.87088	2.50398	5.58973	25039.8	-26.6179	1610.42	0.479963	6.25	0.890332	26707.9	6.35903
219	Northern	Y4	Y4	Early_Winter	Non-fum	67.343	0.0221446	0.28267	22.1446	282.67	12.7647	1128.18	0.3668	0.776248	0.409348	3.28856	4093.48	-24.7442	1135.45	0.352665	6.85	0.0906483	2189.84	0.521392
220	Northern	Y5	Y5	Early_Winter	Non-fum	58.7512	0.0147243	0.187315	14.7243	187.315	12.7214	5181.2	0.3668	2.22173	1.85483	4.20738	18548.3	-24.2004	1998.44	0.706327	8.275	0.273111	15962.9	3.8007
221	Northern	T1	T1	Early_Winter	Non-fum	32.1048	0.00710711	0.101081	7.10711	101.081	14.2225	16904.1	0.3668	6.17514	5.80824	6.86421	58082.4	-24.1246	2194.16	1.26914	5.475	0.412798	28683.3	6.82936
222	Northern	T2	T2	Early_Winter	Non-fum	36.1336	0.0105075	0.184883	10.5075	184.883	17.5953	683.338	0.3668	0.61499	0.24809	6.44412	2480.9	-26.9351	1294.57	0.789886	3.725	0.0260681	767.008	0.182621
223	Northern	T3	T3	Early_Winter	Non-fum	43.9271	0.00797959	0.0943756	7.97959	94.3756	11.8271	308.432	0.3668	0.478677	0.111777	5.61289	1117.77	-22.3701	1536.33	0.95828	5.25	0.00891936	448.73	0.106841
224	Northern	T4	T4	Early_Winter	Non-fum	44.3793	0.0112283	0.139623	11.2283	139.623	12.4349	206.531	0.3668	0.441562	0.0746622	5.59544	746.622	-23.6849	1537.07	1.0498	5.775	0.00838331	508.247	0.121011
225	Northern	T5	T5	Early_Winter	Non-fum	34.3313	0.0091136	0.0860186	9.1136	86.0186	9.43849	6121.12	0.3668	2.55095	2.18405	6.66537	21840.5	-22.8355	1982.04	1.19894	5.65	0.199045	13483.3	3.21031
226	Eastern	K1	K1	Early_Winter	Non-fum	30.401	0.00482755	0.162056	4.82755	162.056	33.569	2689.48	0.3668	1.3381	0.971204	6.93902	9712.04	-25.3773	2142.61	1.10158	5.425	0.0468854	2801.9	0.667118
227	Eastern	K2	K2	Early_Winter	Non-fum	39.1304	0.00931494	0.131481	9.31494	131.481	14.1151	1763.47	0.3668	1.00564	0.638737	3.02522	6387.37	-18.7618	1700.81	0.866437	5.9	0.059498	3041.52	0.724172
228	Eastern	K3	K3	Early_Winter	Non-fum	43.7908	0.0131759	0.247623	13.1759	247.623	18.7937	1084.95	0.3668	0.760598	0.393698	5.64902	3936.98	-24.2605	2062.43	0.849808	7.025	0.0518731	3096.77	0.737326
229	Eastern	K4	K4	Early_Winter	Non-fum	49.5455	0.00941366	0.12076	9.41366	120.76	12.8281	779.693	0.3668	0.649963	0.283063	2.51768	2830.63	-18.5083	2153.03	0.882917	7.2	0.0266466	1693.92	0.403315
230	Eastern	K5	K5	Early_Winter	Non-fum	32.3404	0.0149272	0.238696	14.9272	238.696	15.9907	543.604	0.3668	0.564227	0.197327	6.75243	1973.27	-19.7478	2875.74	1.15602	7.025	0.0294554	2392.08	0.569543
231	Eastern	K6	K6	Early_Winter	Non-fum	50.7874	0.272622	3.81395	272.622	3813.95	13.9899	4668.23	0.3668	2.04111	1.67421	3.45472	16742.1	-26.1347	1669.97	0.424759	7.925	4.56426	153643	36.5817
232	Eastern	K7	K7	Early_Winter	Non-fum	40.7545	0.0511476	0.751086	51.1476	751.086	14.6847	690.032	0.3668	0.61742	0.25052	2.96228	2505.2	-25.4711	1256.96	0.783119	6.675	0.128135	6698.02	1.59477
233	Eastern	K8	K8	Early_Winter	Non-fum	39.2857	0.0182475	0.212894	18.2475	212.894	11.667	1151.48	0.3668	0.784677	0.417777	6.06536	4177.77	-23.2666	2540.54	1.01003	6.95	0.0762341	5351.4	1.27414
234	Southeastern	S1	S1	Early_Winter	Non-fum	58.3333	0.0481416	0.627295	48.1416	627.295	13.0302	2375.77	0.3668	1.22572	0.858824	4.1625	8588.24	-24.1068	1572.71	0.387981	7.25	0.413451	11629.8	2.769
235	Southeastern	S2	S2	Early_Winter	Non-fum	31.2329	0.0208063	0.248076	20.8063	248.076	11.9231	459.839	0.3668	0.533772	0.166872	3.43836	1668.72	-23.5064	1323.47	0.990526	3.775	0.0347199	1298.26	0.309109
236	Southeastern	S3	S3	Early_Winter	Non-fum	29.4461	0.0107993	0.122106	10.7993	122.106	11.3068	3031	0.3668	1.46016	1.09326	3.50653	10932.6	-18.7715	1476.81	1.07056	4.6	0.118065	5814.17	1.38433
237	Southeastern	S4	S4	Early_Winter	Non-fum	43.2077	0.0121707	0.29401	12.1707	294.01	24.1572	3761.01	0.3668	1.72004	1.35314	2.82258	13531.4	-23.9932	1457.66	0.708612	5.20833	0.164687	6078.06	1.44716
238	Southeastern	S5	S5	Early_Winter	Non-fum	32.6498	0.0110045	0.150154	11.0045	150.154	13.6449	1599.53	0.3668	0.946542	0.579642	3.36077	5796.42	-24.0226	2610.51	1.0071	8	0.0637864	5139.16	1.22361
239	Southeastern	S6	S6	Early_Winter	Non-fum	64.3766	0.0686703	0.96086	68.6703	960.86	13.9924	6689.25	0.3668	2.74887	2.38197	1.79186	23819.7	-26.9302	856.311	0.74273	6.9	1.63571	83827.2	19.9589
240	Southeastern	S7	S7	Early_Winter	Non-fum	43.2077	0.0440225	0.894241	44.0225	894.241	20.3133	246.959	0.3668	0.456291	0.0893907	2.36256	893.907	-26.9744	1549.58	0.506874	5.95556	0.039352	1187.93	0.282839
241	Southeastern	S8	S8	Early_Winter	Non-fum	43.2077	0.0391174	0.602572	39.1174	602.572	15.4042	1095.09	0.3668	0.764269	0.397369	2.70899	3973.69	-26.3434	1545.72	0.555923	5.73981	0.15544	4959.94	1.18094
242	Southern	F1	F1	Early_Winter	Non-fum	44.152	0.0102161	0.20985	10.2161	209.85	20.5411	665.186	0.3668	0.608398	0.241498	5.59596	2414.98	-23.0648	2963.48	0.852894	6.35	0.0246717	1336.19	0.31814
243	Southern	F2	F2	Early_Winter	Non-fum	38.1995	0.0113688	0.254876	11.3688	254.876	22.4189	1922.03	0.3668	1.06272	0.695823	6.19241	6958.23	-23.2314	959.511	0.792435	5	0.0791068	3134.35	0.746273
244	Southern	F3	F3	Early_Winter	Non-fum	47.0179	0.0437599	0.725532	43.7599	725.532	16.5798	11670.1	0.3668	4.45025	4.08335	5.3247	40833.5	-19.5737	1257.37	0.45135	6.3	1.78687	50809.8	12.0976
245	Southern	F4	F4	Early_Winter	Non-fum	23.662	0.0105941	0.174752	10.5941	174.752	16.4952	2517.38	0.3668	1.27648	0.909584	3.80163	9095.84	-22.5002	1227.03	1.11475	3.35	0.0963621	3598.55	0.856799
246	Southern	F5	F5	Early_Winter	Non-fum	77.7778	0.00729553	0.250752	7.29553	250.752	34.3707	1284.04	0.3668	0.832621	0.465721	1.11778	4657.21	-24.4201	102.671	0.252148	3.725	0.0339769	319.128	0.075983
247	Southern	F6	F6	Early_Winter	Non-fum	55.4299	0.0210459	0.460997	21.0459	460.997	21.9044	695.449	0.3668	0.619387	0.252487	4.47038	2524.87	-23.5585	914.808	0.535721	4.65	0.0531381	1323.72	0.315172
248	Southern	F7	F7	Early_Winter	Non-fum	29.1743	0.00450357	0.0893102	4.50357	89.3102	19.831	814.235	0.3668	0.662495	0.295595	7.12506	2955.95	-20.0064	1237.48	0.951573	3.90833	0.0133123	495.094	0.117879
249	Southern	F8	F8	Early_Winter	Non-fum	40.8978	0.00851264	0.187132	8.51264	187.132	21.9829	1072.51	0.3668	0.756095	0.389195	5.93387	3891.95	-21.2602	1860.17	1.01218	8.3	0.0331308	2783.34	0.6627
250	Northern	Y1	Y1	Midwinter_I	Non-fum	68.254	0.175625	1.03589	175.625	1035.89	5.8983	2924.11	0.3668	1.42199	1.05509	1.68254	10550.9	-26.0464	510.436	0.462506	5.975	1.853	51207.2	12.1922
251	Northern	Y2	Y2	Midwinter_I	Non-fum	54.0476	0.0548989	0.628656	54.8989	628.656	11.4512	286.958	0.3668	0.470858	0.103958	2.37574	1039.58	-24.9265	555.619	0.376303	3.725	0.0570719	799.993	0.190475
252	Northern	Y3	Y3	Midwinter_I	Non-fum	57.7778	0.202997	1.79885	202.997	1798.85	8.86145	4806.25	0.3668	2.08977	1.72287	2.11111	17228.7	-25.7504	822.734	0.479963	6.25	3.49738	104913	24.9794
253	Northern	Y4	Y4	Midwinter_I	Non-fum	69.6246	0.141215	1.53543	141.215	1535.43	10.8731	1532.8	0.3668	0.922468	0.555568	1.59775	5555.68	-26.1153	684.534	0.352665	6.85	0.784543	18952.7	4.51254
254	Northern	Y5	Y5	Midwinter_I	Non-fum	66.3594	0.0466968	0.507906	46.6968	507.906	10.8767	5485.38	0.3668	2.32851	1.96161	1.73249	19616.1	-25.3793	1483.68	0.706327	8.275	0.916011	53539.5	12.7475
255	Northern	T1	T1	Midwinter_I	Non-fum	34.8249	0.0323534	0.416081	32.3534	416.081	12.8605	4388.97	0.3668	1.9425	1.5756	6.53706	15756	-25.6722	2181.6	1.26914	5.475	0.509761	35420.9	8.43354
256	Northern	T2	T2	Midwinter_I	Non-fum	56.7568	0.144734	2.56496	144.734	2564.96	17.7218	408.844	0.3668	0.515223	0.148323	4.29405	1483.23	-27.2668	545.63	0.789886	3.725	0.214674	6316.4	1.50391
257	Northern	T3	T3	Midwinter_I	Non-fum	48.9117	0.0119261	0.287348	11.9261	287.348	24.0941	591.021	0.3668	0.581458	0.214558	2.6004	2145.58	-25.1594	1228.5	0.95828	5.25	0.0255884	1287.34	0.306511
258	Northern	T4	T4	Midwinter_I	Non-fum	44.6602	0.151165	1.91786	151.165	1917.86	12.6872	3752.78	0.3668	1.71712	1.35022	5.45097	13502.2	-24.7848	1792.46	1.0498	5.775	2.04106	123741	29.4622
259	Northern	T5	T5	Midwinter_I	Non-fum	28.4553	0.0208307	0.247168	20.8307	247.168	11.8656	6156.07	0.3668	2.56315	2.19625	7.12585	21962.5	-24.2179	1952.99	1.19894	5.65	0.457493	30990.5	7.3787
260	Eastern	K1	K1	Midwinter_I	Non-fum	33.7875	0.0203569	0.254706	20.3569	254.706	12.5121	6360.21	0.3668	2.63434	2.26744	6.64774	22674.4	-25.2295	1882.86	1.10158	5.425	0.461579	27584.2	6.56766
261	Eastern	K2	K2	Midwinter_I	Non-fum	41.3924	0.0144603	0.232671	14.4603	232.671	16.0903	13213.7	0.3668	4.96551	4.59861	2.92452	45986.1	-25.4474	1392.54	0.866437	5.9	0.664975	33993.4	8.09367
262	Eastern	K3	K3	Midwinter_I	Non-fum	44.0909	0.0956218	1.5372	95.6218	1537.2	16.0759	1042.19	0.3668	0.745117	0.378217	5.535	3782.17	-24.8304	1544.35	0.849808	7.025	0.361657	21590.6	5.14062
263	Eastern	K4	K4	Midwinter_I	Non-fum	47.6516	0.0157346	0.200809	15.7346	200.809	12.7622	847.567	0.3668	0.674584	0.307684	5.23484	3076.84	-24.2008	1424.37	0.882917	7.2	0.0484129	3077.61	0.732765
264	Eastern	K5	K5	Midwinter_I	Non-fum	43.9539	0.0197724	0.390747	19.7724	390.747	19.7622	991.871	0.3668	0.72689	0.35999	5.58779	3599.9	-23.7318	3560.05	1.15602	7.025	0.0711786	5780.44	1.37629
265	Eastern	K6	K6	Midwinter_I	Non-fum	66.1364	0.295395	3.42664	295.395	3426.64	11.6002	2622	0.3668	1.31395	0.947051	1.69318	9470.51	-25.1267	528.627	0.424759	7.925	2.79754	94171.5	22.4218
266	Eastern	K7	K7	Midwinter_I	Non-fum	44.0393	0.00441433	0.0805734	4.41433	80.5734	18.2527	781.079	0.3668	0.650466	0.283566	5.60167	2835.66	-20.1724	1828.79	0.783119	6.675	0.0125175	654.331	0.155793
267	Eastern	K8	K8	Midwinter_I	Non-fum	30.5794	0.0204647	0.244374	20.4647	244.374	11.9412	570.534	0.3668	0.574014	0.207114	6.96983	2071.14	-24.5053	2157.71	1.01003	6.95	0.0423854	2975.32	0.708411
268	Southeastern	S1	S1	Midwinter_I	Non-fum	67.9188	0.0482391	0.514297	48.2391	514.297	10.6614	3137.49	0.3668	1.49816	1.13126	3.22416	11312.6	-23.861	974.895	0.387981	7.25	0.545707	15350	3.65476
269	Southeastern	S2	S2	Midwinter_I	Non-fum	38.3333	0.0608876	0.698897	60.8876	698.897	11.4785	1068.28	0.3668	0.754561	0.387661	6.15433	3876.61	-24.9853	1189.06	0.990526	3.775	0.236038	8826	2.10143
270	Southeastern	S3	S3	Midwinter_I	Non-fum	36.385	0.00832685	0.0928798	8.32685	92.8798	11.1543	10610.1	0.3668	4.09318	3.72628	6.39331	37262.8	-22.0386	1331.37	1.07056	4.6	0.310281	15280	3.6381
271	Southeastern	S4	S4	Midwinter_I	Non-fum	69.6663	0.0309544	0.58703	30.9544	587.03	18.9643	4007.86	0.3668	1.80761	1.44071	3.02427	14407.1	-24.9276	2573.88	0.708612	15	0.445965	47402.4	11.2863
272	Southeastern	S5	S5	Midwinter_I	Non-fum	36.5828	0.0104032	0.10348	10.4032	103.48	9.94694	5047.14	0.3668	2.17459	1.80769	6.33538	18076.9	-23.7789	2808.69	1.0071	8	0.188057	15151.4	3.60749
273	Southeastern	S6	S6	Midwinter_I	Non-fum	29.3233	0.211183	3.00279	211.183	3002.79	14.2189	1810.63	0.3668	1.02262	0.655721	7.0818	6557.21	-26.3271	3496.7	0.74273	6.9	1.38477	70967.3	16.897
274	Southeastern	S7	S7	Midwinter_I	Non-fum	76.5289	0.0549248	1.15753	54.9248	1157.53	21.0748	1344.31	0.3668	0.854407	0.487507	1.18998	4875.07	-23.9886	626.282	0.506874	2.125	0.267762	2884.09	0.686687
275	Southeastern	S8	S8	Midwinter_I	Non-fum	74.5998	0.0406091	0.48581	40.6091	485.81	11.9631	1626.58	0.3668	0.956296	0.589396	1.28525	5893.96	-23.7904	707.331	0.555923	2.4	0.239348	3193.42	0.760338
276	Southern	F1	F1	Midwinter_I	Non-fum	52	0.028853	0.614898	28.853	614.898	21.3114	3779.1	0.3668	1.72647	1.35957	4.7904	13595.7	-24.6387	1315.51	0.852894	6.35	0.392275	21245.1	5.05837
277	Southern	F2	F2	Midwinter_I	Non-fum	42.9412	0.0458533	1.54245	45.8533	1542.45	33.6389	1960.29	0.3668	1.07649	0.709586	5.70018	7095.86	-24.8355	1382.42	0.792435	5	0.325369	12891.7	3.06945
278	Southern	F3	F3	Midwinter_I	Non-fum	68.7158	0.0305091	0.572771	30.5091	572.771	18.7738	4539.82	0.3668	1.99579	1.62889	1.56734	16288.9	-23.8138	413.856	0.45135	6.3	0.496961	14131.1	3.36455
279	Southern	F4	F4	Midwinter_I	Non-fum	23.9709	0.00764745	0.17403	7.64745	174.03	22.7566	1564.71	0.3668	0.933982	0.567082	7.56489	5670.82	-26.7085	1362.41	1.11475	3.35	0.0433673	1619.51	0.385598
280	Southern	F5	F5	Midwinter_I	Non-fum	76	0.0338632	0.746661	33.8632	746.661	22.0494	1345.14	0.3668	0.854704	0.487804	1.1976	4878.04	-23.5376	88.3841	0.252148	3.725	0.165186	1551.51	0.369407
281	Southern	F6	F6	Midwinter_I	Non-fum	66.6667	0.116216	1.55702	116.216	1557.02	13.3977	2146.15	0.3668	1.1433	0.776401	3.27333	7764.01	-23.5619	657.468	0.535721	4.65	0.902303	22477.3	5.35174
282	Southern	F7	F7	Midwinter_I	Non-fum	31.1311	0.0130069	0.456682	13.0069	456.682	35.1106	3147.34	0.3668	1.50167	1.13477	6.90066	11347.7	-26.6998	1237.48	0.951573	3.90833	0.147599	5489.29	1.30697
283	Southern	F8	F8	Midwinter_I	Non-fum	41.4239	0.00277695	0.0566895	2.77695	56.6895	20.4143	1345.97	0.3668	0.855005	0.488105	5.88689	4881.05	-21.6504	2600.15	1.01218	8.3	0.0135544	1138.72	0.271123
284	Northern	Y1	Y1	Midwinter_II	Non-fum	58.079	0.0476755	0.419499	47.6755	419.499	8.79906	4320.61	0.3668	1.91834	1.55144	4.22145	15514.4	-25.6834	685.638	0.462506	5.975	0.739655	20440.1	4.8667
285	Northern	Y2	Y2	Midwinter_II	Non-fum	54.2197	0.0659676	0.898658	65.9676	898.658	13.6227	1229.13	0.3668	0.812769	0.445869	4.62382	4458.69	-26.4098	495.732	0.376303	3.725	0.294129	4122.9	0.981642
286	Northern	Y3	Y3	Midwinter_II	Non-fum	62.9278	0.155892	1.40888	155.892	1408.88	9.03754	3673.14	0.3668	1.68884	1.32194	3.71464	13219.4	-27.0258	1079.2	0.479963	6.25	2.06079	61818.9	14.7188
287	Northern	Y4	Y4	Midwinter_II	Non-fum	65.9429	0.038629	0.429646	38.629	429.646	11.1224	1693.87	0.3668	0.980556	0.613656	3.3376	6136.56	-25.5375	717.228	0.352665	6.85	0.237049	5726.53	1.36346
288	Northern	Y5	Y5	Midwinter_II	Non-fum	58.927	0.0406516	0.615218	40.6516	615.218	15.1339	4763.2	0.3668	2.0746	1.7077	4.05801	17077	-26.7203	2131.85	0.706327	8.275	0.694208	40575.5	9.66082
289	Northern	T1	T1	Midwinter_II	Non-fum	26.1704	0.0118455	0.170335	11.8455	170.335	14.3797	5060.44	0.3668	2.17927	1.81237	7.36819	18123.7	-25.5236	2073.58	1.26914	5.475	0.214684	14917.4	3.55175
290	Northern	T2	T2	Midwinter_II	Non-fum	55.9906	0.147879	2.37214	147.879	2372.14	16.041	333.742	0.3668	0.487892	0.120992	4.48896	1209.92	-27.0738	368.137	0.789886	3.725	0.178922	5264.46	1.25344
291	Northern	T3	T3	Midwinter_II	Non-fum	39.669	0.0094811	0.108946	9.4811	108.946	11.4909	1389.87	0.3668	0.870865	0.503965	6.07533	5039.65	-23.0783	1717.89	0.95828	5.25	0.0477814	2403.87	0.572349
292	Northern	T4	T4	Midwinter_II	Non-fum	43.155	0.0166049	0.393928	16.6049	393.928	23.7235	616.73	0.3668	0.590799	0.223899	5.66745	2238.99	-26.8056	2135.8	1.0498	5.775	0.0371783	2253.97	0.53666
293	Northern	T5	T5	Midwinter_II	Non-fum	35.9375	0.00343775	0.046939	3.43775	46.939	13.654	4765.6	0.3668	2.07545	1.70855	6.48953	17085.5	-24.1037	2309.12	1.19894	5.65	0.0587355	3978.74	0.947318
294	Eastern	K1	K1	Midwinter_II	Non-fum	35.89	0.00639443	0.0629123	6.39443	62.9123	9.83861	11422.2	0.3668	4.367	4.0001	6.43664	40001	-23.6291	1783.25	1.10158	5.425	0.255784	15285.7	3.63946
295	Eastern	K2	K2	Midwinter_II	Non-fum	37.0546	0.0137409	0.194826	13.7409	194.826	14.1786	10775.4	0.3668	4.14904	3.78214	6.38266	37821.4	-26.8043	1347.94	0.866437	5.9	0.519701	26567	6.32548
296	Eastern	K3	K3	Midwinter_II	Non-fum	41.8277	0.014218	0.36349	14.218	363.49	25.5654	1589.51	0.3668	0.942929	0.576029	5.8405	5760.29	-25.7015	1891.74	0.849808	7.025	0.0818998	4889.34	1.16413
297	Eastern	K4	K4	Midwinter_II	Non-fum	46.8262	0.00638306	0.123622	6.38306	123.622	19.3672	1200.89	0.3668	0.802554	0.435654	5.30143	4356.54	-23.9956	1707.32	0.882917	7.2	0.027808	1767.76	0.420895
298	Eastern	K5	K5	Midwinter_II	Non-fum	41.9755	0.0116451	0.19882	11.6451	198.82	17.0732	644.58	0.3668	0.600915	0.234015	5.87788	2340.15	-24.542	1033.37	1.15602	7.025	0.0272513	2213.09	0.526926
299	Eastern	K6	K6	Midwinter_II	Non-fum	60.1781	0.116159	1.55993	116.159	1559.93	13.4292	3982.56	0.3668	1.79865	1.43175	2.01499	14317.5	-25.7599	971.273	0.424759	7.925	1.6631	55983.7	13.3295
300	Eastern	K7	K7	Midwinter_II	Non-fum	44.9076	0.00451545	0.0683464	4.51545	68.3464	15.1361	1096.13	0.3668	0.764646	0.397746	5.56984	3977.46	-23.9228	2074.96	0.783119	6.675	0.01796	938.827	0.22353
301	Eastern	K8	K8	Midwinter_II	Non-fum	38.9273	0.00788677	0.121508	7.88677	121.508	15.4065	2613.16	0.3668	1.31079	0.943887	6.10117	9438.87	-22.095	1784.99	1.01003	6.95	0.0744422	5225.61	1.24419
302	Southeastern	S1	S1	Midwinter_II	Non-fum	79.1171	0.0160971	0.296081	16.0971	296.081	18.3934	2272.77	0.3668	1.18877	0.821869	1.04623	8218.69	-24.3231	766.548	0.387981	7.25	0.132297	3721.34	0.886034
303	Southeastern	S2	S2	Midwinter_II	Non-fum	40.0636	0.0158448	0.180023	15.8448	180.023	11.3616	10686.6	0.3668	4.11905	3.75215	5.96367	37521.5	-24.3498	1129.56	0.990526	3.775	0.59452	22230.5	5.29297
304	Southeastern	S3	S3	Midwinter_II	Non-fum	32.0874	0.011347	0.289861	11.347	289.861	25.5451	3668.05	0.3668	1.68703	1.32013	6.77768	13201.3	-24.5995	1841.01	1.07056	4.6	0.149795	7376.77	1.75637
305	Southeastern	S4	S4	Midwinter_II	Non-fum	64.4158							0.3668			1.78989			3499.35	0.708612	15
306	Southeastern	S5	S5	Midwinter_II	Non-fum	49.2269	0.00749184	0.100212	7.49184	100.212	13.3762	3308.7	0.3668	1.55918	1.19228	2.55896	11922.8	-23.6478	2588.32	1.0071	8	0.089324	7196.68	1.71349
307	Southeastern	S6	S6	Midwinter_II	Non-fum	57.0106	0.017452	0.230535	17.452	230.535	13.2097	3865.82	0.3668	1.75724	1.39034	2.19246	13903.4	-24.1837	1329.89	0.74273	6.9	0.242643	12435	2.96072
308	Southeastern	S7	S7	Midwinter_II	Non-fum	79.9528	0.0146963	0.233626	14.6963	233.626	15.897	1867.72	0.3668	1.04318	0.676276	1.02842	6762.76	-20.7188	121.671	0.506874	2.125	0.0993874	1070.51	0.254883
309	Southeastern	S8	S8	Midwinter_II	Non-fum	55.6686	0.042636	0.62752	42.636	627.52	14.7181	784.359	0.3668	0.651656	0.284756	2.22544	2847.56	-24.4934	220.306	0.555923	2.4	0.121409	1619.85	0.385679
310	Southern	F1	F1	Midwinter_II	Non-fum	46.9102	0.00121275	0.0230396	1.21275	23.0396	18.9979	1849.23	0.3668	1.03652	0.66962	5.33022	6696.2	-16.3478	1389.12	0.852894	6.35	0.0081208	439.812	0.104717
311	Southern	F2	F2	Midwinter_II	Non-fum	46.4521	0.00211384	0.0406	2.11384	40.6	19.2068	552.697	0.3668	0.567532	0.200632	2.72559	2006.32	-18.8864	1621.99	0.792435	5	0.00424104	168.037	0.0400089
312	Southern	F3	F3	Midwinter_II	Non-fum	71.26	0.0293377	0.509525	29.3377	509.525	17.3676	6343.43	0.3668	2.62849	2.26159	2.89699	22615.9	-22.5546	887.775	0.45135	6.3	0.663499	18866.6	4.49205
313	Southern	F4	F4	Midwinter_II	Non-fum	28.4514	0.00176611	0.0412077	1.76611	41.2077	23.3325	1391.17	0.3668	0.871335	0.504435	7.1477	5044.35	-21.1065	1104.74	1.11475	3.35	0.00890888	332.694	0.0792128
314	Southern	F5	F5	Midwinter_II	Non-fum	78.4349	0.0156623	0.409049	15.6623	409.049	26.1167	2723.05	0.3668	1.35011	0.983214	1.08257	9832.14	-23.3543	187.945	0.252148	3.725	0.153994	1446.4	0.34438
315	Southern	F6	F6	Midwinter_II	Non-fum	57.6182	0.0134016	0.465716	13.4016	465.716	34.7507	903.929	0.3668	0.69502	0.32812	4.1958	3281.2	-25.2854	987.064	0.535721	4.65	0.0439734	1095.42	0.260815
316	Southern	F7	F7	Midwinter_II	Non-fum	35.8819	0.00115966	0.0197802	1.15966	19.7802	17.0568	584.699	0.3668	0.579162	0.212262	6.49516	2122.62	-13.0602	1237.48	0.951573	3.90833	0.00246152	91.5456	0.0217966
317	Southern	F8	F8	Midwinter_II	Non-fum	40.8071	0.00750776	0.185657	7.50776	185.657	24.7287	1197.99	0.3668	0.801505	0.434605	6.014	4346.05	-24.0461	3705.51	1.01218	8.3	0.0326291	2741.19	0.652665
318	Northern	Y1	Y1	Late_Winter_C	Non-fum	48.5526	0.0165673	0.14005	16.5673	140.05	8.4534	8647.8	0.3668	3.42506	3.05816	5.18075	30581.6		601.838	0.462506	5.975	0.506656	14001.3	3.33364
319	Northern	Y2	Y2	Late_Winter_C	Non-fum	66.0693	0.0319996	0.405954	31.9996	405.954	12.6862	2265.47	0.3668	1.18615	0.819248	3.38628	8192.48		223.706	0.376303	3.725	0.262156	3674.72	0.874933
320	Northern	Y3	Y3	Late_Winter_C	Non-fum	74.4481	0.0627935	0.433181	62.7935	433.181	6.8985	2198.43	0.3668	1.16208	0.79518	2.62163	7951.8		541.616	0.479963	6.25	0.499321	14978.5	3.56631
321	Northern	Y4	Y4	Late_Winter_C	Non-fum	25.7593	0.0393658	0.331099	39.3658	331.099	8.41084	1377.02	0.3668	0.866225	0.499325	7.5874	4993.25		3073.33	0.352665	6.85	0.196563	4748.49	1.13059
322	Northern	Y5	Y5	Late_Winter_C	Non-fum	18.5617	0.0186442	0.197893	18.6442	197.893	10.6142	1734.83	0.3668	0.995319	0.628419	8.16012	6284.19		3863.09	0.706327	8.275	0.117164	6848.04	1.63049
323	Northern	T1	T1	Late_Winter_WW	Non-fum	48.9996	0.0233514	0.232982	23.3514	232.982	9.97723	387.841	0.3668	0.507581	0.140681	5.21734	1406.81		1171.2	1.26914	5.475	0.0328509	2282.65	0.543488
324	Northern	T2	T2	Late_Winter_WW	Non-fum	32.5855	0.0179033	0.197271	17.9033	197.271	11.0187	771.611	0.3668	0.64703	0.28013	6.74145	2801.3		1604.91	0.789886	3.725	0.0501527	1475.65	0.351346
325	Northern	T3	T3	Late_Winter_WW	Non-fum	36.7777	0.0116017	0.128398	11.6017	128.398	11.0672	1126.84	0.3668	0.775761	0.408861	6.42971	4088.61		2037.41	0.95828	5.25	0.0474348	2386.43	0.568198
326	Northern	T4	T4	Late_Winter_WW	Non-fum	33.2821	0.0188653	0.212378	18.8653	212.378	11.2576	1271.27	0.3668	0.828004	0.461104	6.67846	4611.04		2391.81	1.0498	5.775	0.0869888	5273.79	1.25566
327	Northern	T5	T5	Late_Winter_WW	Non-fum	61.9591	0.0112743	0.13166	11.2743	131.66	11.678	2904.85	0.3668	1.41511	1.04821	3.85354	10482.1		1338.91	1.19894	5.65	0.118178	8005.35	1.90604
328	Eastern	K1	K1	Late_Winter_C	Non-fum	30.6705	0.0160748	0.245583	16.0748	245.583	15.2775	7064.35	0.3668	2.8791	2.5122	6.91909	25122		1882.17	1.10158	5.425	0.403833	24133.2	5.74601
329	Eastern	K2	K2	Late_Winter_C	Non-fum	39.4515	0.0061782	0.072185	6.1782	72.185	11.6838	3449.48	0.3668	1.60931	1.24241	6.08513	12424.1		1879.99	0.866437	5.9	0.0767582	3923.86	0.934254
330	Eastern	K3	K3	Late_Winter_C	Non-fum	53.6697	0.0107397	0.375639	10.7397	375.639	34.9769	1767.83	0.3668	1.00721	0.640308	4.62839	6403.08		1057.3	0.849808	7.025	0.0687669	4105.32	0.977456
331	Eastern	K4	K4	Late_Winter_C	Non-fum	36.0032	0.00490552	0.0607123	4.90552	60.7123	12.3763	1047.01	0.3668	0.746862	0.379962	6.47648	3799.62		1740.84	0.882917	7.2	0.0186391	1184.89	0.282116
332	Eastern	K5	K5	Late_Winter_WW	Non-fum	38.483	0.00539638	0.080953	5.39638	80.953	15.0013	788.1	0.3668	0.653013	0.286113	6.18246	2861.13		2600.24	1.15602	7.025	0.0154398	1253.87	0.29854
333	Eastern	K6	K6	Late_Winter_WW	Non-fum	36.2802		0.943593		943.593			0.3668	0.731405	0.364505	6.46118			3251.4	0.424759	7.925
334	Eastern	K7	K7	Late_Winter_WW	Non-fum	35.9426	0.00673002	0.0984953	6.73002	98.4953	14.6352	1004.34	0.3668	0.749212	0.382312	6.40574	3645.05		2903.46	0.783119	6.675	0.0257296	1344.97	0.320231
335	Eastern	K8	K8	Late_Winter_WW	Non-fum	33.7239	0.00572326	0.064867	5.72326	64.867	11.3339	1053.5	0.3668	1.40302	1.03612	6.62761	3823.12		2614.28	1.01003	6.95	0.0592999	4162.67	0.991112
336	Southeastern	S1	S1	Late_Winter_C	Non-fum	72.4444	0.0181993	0.248772	18.1993	248.772	13.6693	2871.02	0.3668	1.26025	0.893345	2.76658	10361.2		331.31	0.387981	7.25	0.162582	4573.21	1.08886
337	Southeastern	S2	S2	Late_Winter_C	Non-fum	60.9215	0.00780993	0.101319	7.80993	101.319	12.9732	2472.06	0.3668	3.05957	2.69267	3.90003	8933.45		820.279	0.990526	3.775	0.210296	7863.45	1.87225
338	Southeastern	S3	S3	Late_Winter_C	Non-fum	17.8236	0.0149675	0.124252	14.9675	124.252	8.30145	7585.79	0.3668	3.0916	2.7247	8.30803	26926.7		1399.61	1.07056	4.6	0.40782	20083.4	4.78176
339	Southeastern	S4	S4	Late_Winter_C	Non-fum	48.6685	0.0138127	0.264809	13.8127	264.809	19.1714	7678.53	0.3668	0.366808	-9.19603e-05	2.56144	27247		2084.53	0.708612	15	-1.27022e-05	-1.35014	-0.000321463
340	Southeastern	S5	S5	Late_Winter_WW	Non-fum	33.0625	0.0206275	0.254074	20.6275	254.074	12.3172	4611.8	0.3668	2.0212	1.6543	6.72722	16543		2551.45	1.0071	8	0.341242	27493.3	6.54601
341	Southeastern	S6	S6	Late_Winter_WW	Non-fum	28.887	0.0164129	0.272911	16.4129	272.911	16.6278	4525.68	0.3668	1.9908	1.6239	7.16819	16239		2599.57	0.74273	6.9	0.266529	13659.2	3.25219
342	Southeastern	S7	S7	Late_Winter_WW	Non-fum	64.5418	0.0156477	0.30534	15.6477	305.34	19.5134	3353.91	0.3668	1.57529	1.20839	3.53518	12083.9		68.8579	0.506874	2.125	0.189084	2036.64	0.484914
343	Southeastern	S8	S8	Late_Winter_WW	Non-fum	62.9969	0.00922136	0.124031	9.22136	124.031	13.4504	2555.52	0.3668	1.29015	0.923245	1.85015	9232.45		125.2	0.555923	2.4	0.0851357	1135.89	0.270451
344	Southern	F1	F1	Late_Winter_C	Non-fum	25.2459	0.0037974	0.075664	3.7974	75.664	19.9252	707.998	0.3668	0.623943	0.257043	7.46793	2570.43		1487.24	0.852894	6.35	0.00976094	528.641	0.125867
345	Southern	F2	F2	Late_Winter_C	Non-fum	56.4557	0.00437918	0.150502	4.37918	150.502	34.3677	3737.63	0.3668	1.71174	1.34484	4.35443	13448.4		893.799	0.792435	5	0.0588931	2333.45	0.555583
346	Southern	F3	F3	Late_Winter_C	Non-fum	51.6484	0.00987635	0.238633	9.87635	238.633	24.1621	8892.71	0.3668	3.50895	3.14205	4.83033	31420.5		906.56	0.45135	6.3	0.31032	8823.97	2.10095
347	Southern	F4	F4	Late_Winter_C	Non-fum	24.5669	0.0049615	0.092922	4.9615	92.922	18.7286	2416.15	0.3668	1.2402	0.873304	7.6112	8733.04		799.503	1.11475	3.35	0.043329	1618.08	0.385257
348	Southern	F5	F5	Late_Winter_WW	Non-fum	47.9576	0.00470055	0.214544	4.70055	214.544	45.6424	663.652	0.3668	0.607841	0.240941	5.24587	2409.41		792.436	0.252148	3.725	0.0113256	106.376	0.0253275
349	Southern	F6	F6	Late_Winter_WW	Non-fum	15.6535	0.00495541	0.216836	4.95541	216.836	43.7574	3964.8	0.3668	1.79235	1.42545	8.42622	14254.5		1590.18	0.535721	4.65	0.070637	1759.64	0.418962
350	Southern	F7	F7	Late_Winter_WW	Non-fum	68.3794	0.00481367	0.136088	4.81367	136.088	28.2711	1174.43	0.3668	0.792983	0.426083	1.58103	4260.83		1101.75	0.951573	3.90833	0.0205102	762.789	0.181616
351	Southern	F8	F8	Late_Winter_WW	Non-fum	40.2928	0.00216309	0.0339046	2.16309	33.9046	15.6742	457.567	0.3668	0.532946	0.166046	5.96475	1660.46		1805.46	1.01218	8.3	0.00359173	301.743	0.0718436
