# Supplementary material
Source: Research Square preprint supplement (doi:10.21203/rs.3.rs-9353987/v1)
Supplement: Supplementary file 2 [file 26fac57efc76ea6d07c241ef.xlsx]

## Sheet: Sheet1
	Site	Winter_stage	Mesocosm_x	PFT	Species	Stem_leaf	N_percentage	d15N	C_Percentage	d13C	AT%_x	AT%_y	15NAPE%	Mesocosm_y	G_dryweight_total_mesocosm	Total_g_N_mesocosm	g_15N_APE_total_mesocosm	mg_15NAPE_per_g_dryweight_biomass	g_15N_APE_pr_m2
13	Southeastern	Early_Winter		Evergreen	Empetrum	Leaf	1.23727	51.2265	178.88	-29.3278	0.384943	0.36287	0.022073	S1	18.12	22.4193	0.00494861	0.273102	0.219938
14	Southeastern	Early_Winter		Evergreen	Empetrum	Leaf	1.23727	51.2265	178.88	-29.3278	0.384943	0.36287	0.022073	S3	1.63	2.01675	0.000445156	0.273102	0.0197847
15	Southeastern	Early_Winter		Evergreen	Empetrum	Leaf	1.23727	51.2265	178.88	-29.3278	0.384943	0.36287	0.022073	S4	19.4	24.003	0.00529818	0.273102	0.235475
16	Southeastern	Early_Winter		Evergreen	Empetrum	Leaf	1.23727	51.2265	178.88	-29.3278	0.384943	0.36287	0.022073	S5	4.06	5.02331	0.00110879	0.273102	0.0492797
17	Southeastern	Early_Winter		Evergreen	Empetrum	Leaf	1.23727	51.2265	178.88	-29.3278	0.384943	0.36287	0.022073	S6	5.22	6.45854	0.00142559	0.273102	0.0633596
18	Southeastern	Early_Winter		Evergreen	Empetrum	Leaf	1.23727	51.2265	178.88	-29.3278	0.384943	0.36287	0.022073	S7	12.1	14.9709	0.00330453	0.273102	0.146868
19	Southeastern	Early_Winter		Evergreen	Empetrum	Leaf	1.23727	51.2265	178.88	-29.3278	0.384943	0.36287	0.022073	S8	5.98	7.39886	0.00163315	0.273102	0.0725844
41	Southeastern	Midwinter_I		Evergreen	Empetrum	Leaf	0.841252	45.694	436.178	-28.1639	0.382925	0.36287	0.0200548	S1	18.12	15.2435	0.00305705	0.168712	0.135869
42	Southeastern	Midwinter_I		Evergreen	Empetrum	Leaf	0.841252	45.694	436.178	-28.1639	0.382925	0.36287	0.0200548	S3	1.63	1.37124	0.000275	0.168712	0.0122222
43	Southeastern	Midwinter_I		Evergreen	Empetrum	Leaf	0.841252	45.694	436.178	-28.1639	0.382925	0.36287	0.0200548	S4	19.4	16.3203	0.003273	0.168712	0.145467
44	Southeastern	Midwinter_I		Evergreen	Empetrum	Leaf	0.841252	45.694	436.178	-28.1639	0.382925	0.36287	0.0200548	S5	4.06	3.41548	0.000684969	0.168712	0.0304431
45	Southeastern	Midwinter_I		Evergreen	Empetrum	Leaf	0.841252	45.694	436.178	-28.1639	0.382925	0.36287	0.0200548	S6	5.22	4.39133	0.000880674	0.168712	0.0391411
46	Southeastern	Midwinter_I		Evergreen	Empetrum	Leaf	0.841252	45.694	436.178	-28.1639	0.382925	0.36287	0.0200548	S7	12.1	10.1791	0.00204141	0.168712	0.0907293
47	Southeastern	Midwinter_I		Evergreen	Empetrum	Leaf	0.841252	45.694	436.178	-28.1639	0.382925	0.36287	0.0200548	S8	5.98	5.03068	0.0010089	0.168712	0.0448398
69	Southeastern	Midwinter_II		Evergreen	Empetrum	Leaf	1.04239	50.5153	1052.24	-28.6459	0.384684	0.36287	0.0218136	S1	18.12	18.8882	0.00412019	0.227383	0.183119
70	Southeastern	Midwinter_II		Evergreen	Empetrum	Leaf	1.04239	50.5153	1052.24	-28.6459	0.384684	0.36287	0.0218136	S3	1.63	1.6991	0.000370635	0.227383	0.0164727
71	Southeastern	Midwinter_II		Evergreen	Empetrum	Leaf	1.04239	50.5153	1052.24	-28.6459	0.384684	0.36287	0.0218136	S4	19.4	20.2224	0.00441124	0.227383	0.196055
72	Southeastern	Midwinter_II		Evergreen	Empetrum	Leaf	1.04239	50.5153	1052.24	-28.6459	0.384684	0.36287	0.0218136	S5	4.06	4.23212	0.000923177	0.227383	0.0410301
73	Southeastern	Midwinter_II		Evergreen	Empetrum	Leaf	1.04239	50.5153	1052.24	-28.6459	0.384684	0.36287	0.0218136	S6	5.22	5.44129	0.00118694	0.227383	0.052753
74	Southeastern	Midwinter_II		Evergreen	Empetrum	Leaf	1.04239	50.5153	1052.24	-28.6459	0.384684	0.36287	0.0218136	S7	12.1	12.613	0.00275134	0.227383	0.122282
75	Southeastern	Midwinter_II		Evergreen	Empetrum	Leaf	1.04239	50.5153	1052.24	-28.6459	0.384684	0.36287	0.0218136	S8	5.98	6.23351	0.00135975	0.227383	0.0604335
97	Southeastern	Late_Winter_C		Evergreen	Empetrum	Leaf	1.17009	46.9812	10.114	-27.5935	0.383395	0.36287	0.0205244	S1	18.12	21.202	0.00435159	0.240154	0.193404
98	Southeastern	Late_Winter_C		Evergreen	Empetrum	Leaf	1.17009	46.9812	10.114	-27.5935	0.383395	0.36287	0.0205244	S3	1.63	1.90724	0.000391451	0.240154	0.0173978
99	Southeastern	Late_Winter_C		Evergreen	Empetrum	Leaf	1.17009	46.9812	10.114	-27.5935	0.383395	0.36287	0.0205244	S4	19.4	22.6997	0.00465898	0.240154	0.207066
100	Southeastern	Late_Winter_C		Evergreen	Empetrum	Leaf	1.17009	46.9812	10.114	-27.5935	0.383395	0.36287	0.0205244	S5	4.06	4.75056	0.000975025	0.240154	0.0433344
101	Southeastern	Late_Winter_C		Evergreen	Empetrum	Leaf	1.17009	46.9812	10.114	-27.5935	0.383395	0.36287	0.0205244	S6	5.22	6.10786	0.0012536	0.240154	0.0557157
102	Southeastern	Late_Winter_C		Evergreen	Empetrum	Leaf	1.17009	46.9812	10.114	-27.5935	0.383395	0.36287	0.0205244	S7	12.1	14.1581	0.00290586	0.240154	0.129149
103	Southeastern	Late_Winter_C		Evergreen	Empetrum	Leaf	1.17009	46.9812	10.114	-27.5935	0.383395	0.36287	0.0205244	S8	5.98	6.99713	0.00143612	0.240154	0.0638276
125	Southeastern	Late_Winter_WW		Evergreen	Empetrum	Leaf	1.06039	48.0707	1361.7	-28.7845	0.383792	0.36287	0.0209219	S1	18.12	19.2143	0.00401999	0.221854	0.178666
126	Southeastern	Late_Winter_WW		Evergreen	Empetrum	Leaf	1.06039	48.0707	1361.7	-28.7845	0.383792	0.36287	0.0209219	S3	1.63	1.72844	0.000361622	0.221854	0.0160721
127	Southeastern	Late_Winter_WW		Evergreen	Empetrum	Leaf	1.06039	48.0707	1361.7	-28.7845	0.383792	0.36287	0.0209219	S4	19.4	20.5716	0.00430396	0.221854	0.191287
128	Southeastern	Late_Winter_WW		Evergreen	Empetrum	Leaf	1.06039	48.0707	1361.7	-28.7845	0.383792	0.36287	0.0209219	S5	4.06	4.3052	0.000900727	0.221854	0.0400323
129	Southeastern	Late_Winter_WW		Evergreen	Empetrum	Leaf	1.06039	48.0707	1361.7	-28.7845	0.383792	0.36287	0.0209219	S6	5.22	5.53525	0.00115808	0.221854	0.0514701
130	Southeastern	Late_Winter_WW		Evergreen	Empetrum	Leaf	1.06039	48.0707	1361.7	-28.7845	0.383792	0.36287	0.0209219	S7	12.1	12.8308	0.00268443	0.221854	0.119308
131	Southeastern	Late_Winter_WW		Evergreen	Empetrum	Leaf	1.06039	48.0707	1361.7	-28.7845	0.383792	0.36287	0.0209219	S8	5.98	6.34115	0.00132669	0.221854	0.0589638
154	Southeastern	Early_Winter		Evergreen	Empetrum	Stem	0.956838	50.7097	127.486	-28.4008	0.384755	0.36287	0.0218845	S1	11.7	11.195	0.00244997	0.209399	0.108887
155	Southeastern	Early_Winter		Evergreen	Empetrum	Stem	0.956838	50.7097	127.486	-28.4008	0.384755	0.36287	0.0218845	S3	4.46	4.2675	0.00093392	0.209399	0.0415075
156	Southeastern	Early_Winter		Evergreen	Empetrum	Stem	0.956838	50.7097	127.486	-28.4008	0.384755	0.36287	0.0218845	S4	22.97	21.9786	0.0048099	0.209399	0.213773
157	Southeastern	Early_Winter		Evergreen	Empetrum	Stem	0.956838	50.7097	127.486	-28.4008	0.384755	0.36287	0.0218845	S5	4.6	4.40145	0.000963235	0.209399	0.0428105
158	Southeastern	Early_Winter		Evergreen	Empetrum	Stem	0.956838	50.7097	127.486	-28.4008	0.384755	0.36287	0.0218845	S6	5.29	5.06167	0.00110772	0.209399	0.049232
159	Southeastern	Early_Winter		Evergreen	Empetrum	Stem	0.956838	50.7097	127.486	-28.4008	0.384755	0.36287	0.0218845	S7	20	19.1368	0.00418798	0.209399	0.186132
160	Southeastern	Early_Winter		Evergreen	Empetrum	Stem	0.956838	50.7097	127.486	-28.4008	0.384755	0.36287	0.0218845	S8	12.2	11.6734	0.00255467	0.209399	0.113541
183	Southeastern	Midwinter_I		Evergreen	Empetrum	Stem	0.640265	46.4683	540.77	-27.9089	0.383208	0.36287	0.0203373	S1	11.7	7.4911	0.00152349	0.130212	0.0677105
184	Southeastern	Midwinter_I		Evergreen	Empetrum	Stem	0.640265	46.4683	540.77	-27.9089	0.383208	0.36287	0.0203373	S3	4.46	2.85558	0.000580747	0.130212	0.025811
185	Southeastern	Midwinter_I		Evergreen	Empetrum	Stem	0.640265	46.4683	540.77	-27.9089	0.383208	0.36287	0.0203373	S4	22.97	14.7069	0.00299098	0.130212	0.132932
186	Southeastern	Midwinter_I		Evergreen	Empetrum	Stem	0.640265	46.4683	540.77	-27.9089	0.383208	0.36287	0.0203373	S5	4.6	2.94522	0.000598977	0.130212	0.0266212
187	Southeastern	Midwinter_I		Evergreen	Empetrum	Stem	0.640265	46.4683	540.77	-27.9089	0.383208	0.36287	0.0203373	S6	5.29	3.387	0.000688824	0.130212	0.0306144
188	Southeastern	Midwinter_I		Evergreen	Empetrum	Stem	0.640265	46.4683	540.77	-27.9089	0.383208	0.36287	0.0203373	S7	20	12.8053	0.00260425	0.130212	0.115744
189	Southeastern	Midwinter_I		Evergreen	Empetrum	Stem	0.640265	46.4683	540.77	-27.9089	0.383208	0.36287	0.0203373	S8	12.2	7.81123	0.00158859	0.130212	0.0706041
212	Southeastern	Midwinter_II		Evergreen	Empetrum	Stem	0.656976	48.2054	1763.56	-28.1479	0.383841	0.36287	0.020971	S1	11.7	7.68661	0.00161196	0.137774	0.0716426
213	Southeastern	Midwinter_II		Evergreen	Empetrum	Stem	0.656976	48.2054	1763.56	-28.1479	0.383841	0.36287	0.020971	S3	4.46	2.93011	0.000614473	0.137774	0.0273099
214	Southeastern	Midwinter_II		Evergreen	Empetrum	Stem	0.656976	48.2054	1763.56	-28.1479	0.383841	0.36287	0.020971	S4	22.97	15.0907	0.00316467	0.137774	0.140652
215	Southeastern	Midwinter_II		Evergreen	Empetrum	Stem	0.656976	48.2054	1763.56	-28.1479	0.383841	0.36287	0.020971	S5	4.6	3.02209	0.000633761	0.137774	0.0281672
216	Southeastern	Midwinter_II		Evergreen	Empetrum	Stem	0.656976	48.2054	1763.56	-28.1479	0.383841	0.36287	0.020971	S6	5.29	3.4754	0.000728825	0.137774	0.0323922
217	Southeastern	Midwinter_II		Evergreen	Empetrum	Stem	0.656976	48.2054	1763.56	-28.1479	0.383841	0.36287	0.020971	S7	20	13.1395	0.00275548	0.137774	0.122466
218	Southeastern	Midwinter_II		Evergreen	Empetrum	Stem	0.656976	48.2054	1763.56	-28.1479	0.383841	0.36287	0.020971	S8	12.2	8.0151	0.00168085	0.137774	0.0747042
241	Southeastern	Late_Winter_C		Evergreen	Empetrum	Stem	0.859089	49.9645	20.965	-27.9035	0.384483	0.36287	0.0216127	S1	11.7	10.0513	0.00217236	0.185672	0.0965494
242	Southeastern	Late_Winter_C		Evergreen	Empetrum	Stem	0.859089	49.9645	20.965	-27.9035	0.384483	0.36287	0.0216127	S3	4.46	3.83154	0.000828097	0.185672	0.0368043
243	Southeastern	Late_Winter_C		Evergreen	Empetrum	Stem	0.859089	49.9645	20.965	-27.9035	0.384483	0.36287	0.0216127	S4	22.97	19.7333	0.00426488	0.185672	0.18955
244	Southeastern	Late_Winter_C		Evergreen	Empetrum	Stem	0.859089	49.9645	20.965	-27.9035	0.384483	0.36287	0.0216127	S5	4.6	3.95181	0.000854091	0.185672	0.0379596
245	Southeastern	Late_Winter_C		Evergreen	Empetrum	Stem	0.859089	49.9645	20.965	-27.9035	0.384483	0.36287	0.0216127	S6	5.29	4.54458	0.000982204	0.185672	0.0436535
246	Southeastern	Late_Winter_C		Evergreen	Empetrum	Stem	0.859089	49.9645	20.965	-27.9035	0.384483	0.36287	0.0216127	S7	20	17.1818	0.00371344	0.185672	0.165042
247	Southeastern	Late_Winter_C		Evergreen	Empetrum	Stem	0.859089	49.9645	20.965	-27.9035	0.384483	0.36287	0.0216127	S8	12.2	10.4809	0.0022652	0.185672	0.100675
270	Southeastern	Late_Winter_WW		Evergreen	Empetrum	Stem	0.805236	45.5783	2378.9	-28.1835	0.382883	0.36287	0.0200126	S1	11.7	9.42126	0.00188544	0.161149	0.0837974
271	Southeastern	Late_Winter_WW		Evergreen	Empetrum	Stem	0.805236	45.5783	2378.9	-28.1835	0.382883	0.36287	0.0200126	S3	4.46	3.59135	0.000718724	0.161149	0.0319433
272	Southeastern	Late_Winter_WW		Evergreen	Empetrum	Stem	0.805236	45.5783	2378.9	-28.1835	0.382883	0.36287	0.0200126	S4	22.97	18.4963	0.00370159	0.161149	0.164515
273	Southeastern	Late_Winter_WW		Evergreen	Empetrum	Stem	0.805236	45.5783	2378.9	-28.1835	0.382883	0.36287	0.0200126	S5	4.6	3.70408	0.000741285	0.161149	0.032946
274	Southeastern	Late_Winter_WW		Evergreen	Empetrum	Stem	0.805236	45.5783	2378.9	-28.1835	0.382883	0.36287	0.0200126	S6	5.29	4.2597	0.000852477	0.161149	0.0378879
275	Southeastern	Late_Winter_WW		Evergreen	Empetrum	Stem	0.805236	45.5783	2378.9	-28.1835	0.382883	0.36287	0.0200126	S7	20	16.1047	0.00322298	0.161149	0.143243
276	Southeastern	Late_Winter_WW		Evergreen	Empetrum	Stem	0.805236	45.5783	2378.9	-28.1835	0.382883	0.36287	0.0200126	S8	12.2	9.82387	0.00196602	0.161149	0.0873785
302	Southeastern	Early_Winter		Deciduous	Vaccinum	Leaf	1.57172	46.7203	137.264	-29.7338	0.3833	0.363926	0.0193731	S2	0.56	0.880166	0.000170515	0.304492	0.00757846
303	Southeastern	Early_Winter		Deciduous	Vaccinum	Leaf	1.57172	46.7203	137.264	-29.7338	0.3833	0.363926	0.0193731	S6	4.76	7.48141	0.00144938	0.304492	0.0644169
304	Southeastern	Early_Winter		Deciduous	Vaccinum	Leaf	1.57172	46.7203	137.264	-29.7338	0.3833	0.363926	0.0193731	S7	0.33	0.518669	0.000100482	0.304492	0.00446588
305	Southeastern	Early_Winter		Deciduous	Vaccinum	Leaf	1.57172	46.7203	137.264	-29.7338	0.3833	0.363926	0.0193731	S8	0.95	1.49314	0.000289267	0.304492	0.0128563
325	Southeastern	Midwinter_I		Deciduous	Vaccinum	Leaf	1.65493	42.5417	23.517	-28.4689	0.381775	0.363926	0.0178488	S2	0.56	0.926763	0.000165416	0.295385	0.00735182
326	Southeastern	Midwinter_I		Deciduous	Vaccinum	Leaf	1.65493	42.5417	23.517	-28.4689	0.381775	0.363926	0.0178488	S6	4.76	7.87749	0.00140603	0.295385	0.0624904
327	Southeastern	Midwinter_I		Deciduous	Vaccinum	Leaf	1.65493	42.5417	23.517	-28.4689	0.381775	0.363926	0.0178488	S7	0.33	0.546128	9.74772e-05	0.295385	0.00433232
328	Southeastern	Midwinter_I		Deciduous	Vaccinum	Leaf	1.65493	42.5417	23.517	-28.4689	0.381775	0.363926	0.0178488	S8	0.95	1.57219	0.000280616	0.295385	0.0124718
348	Southeastern	Midwinter_II		Deciduous	Vaccinum	Leaf	0.79088	45.9229	42.736	-29.4809	0.383009	0.363926	0.0190822	S2	0.56	0.442893	8.45137e-05	0.150917	0.00375616
349	Southeastern	Midwinter_II		Deciduous	Vaccinum	Leaf	0.79088	45.9229	42.736	-29.4809	0.383009	0.363926	0.0190822	S6	4.76	3.76459	0.000718366	0.150917	0.0319274
350	Southeastern	Midwinter_II		Deciduous	Vaccinum	Leaf	0.79088	45.9229	42.736	-29.4809	0.383009	0.363926	0.0190822	S7	0.33	0.26099	4.98027e-05	0.150917	0.00221345
351	Southeastern	Midwinter_II		Deciduous	Vaccinum	Leaf	0.79088	45.9229	42.736	-29.4809	0.383009	0.363926	0.0190822	S8	0.95	0.751336	0.000143371	0.150917	0.00637206
371	Southeastern	Late_Winter_C		Deciduous	Vaccinum	Leaf	1.57517	39.3686	13.486	-27.6655	0.380618	0.363926	0.0166912	S2	0.56	0.882096	0.000147233	0.262915	0.00654367
372	Southeastern	Late_Winter_C		Deciduous	Vaccinum	Leaf	1.57517	39.3686	13.486	-27.6655	0.380618	0.363926	0.0166912	S6	4.76	7.49781	0.00125148	0.262915	0.0556212
373	Southeastern	Late_Winter_C		Deciduous	Vaccinum	Leaf	1.57517	39.3686	13.486	-27.6655	0.380618	0.363926	0.0166912	S7	0.33	0.519806	8.6762e-05	0.262915	0.00385609
374	Southeastern	Late_Winter_C		Deciduous	Vaccinum	Leaf	1.57517	39.3686	13.486	-27.6655	0.380618	0.363926	0.0166912	S8	0.95	1.49641	0.000249769	0.262915	0.0111009
394	Southeastern	Late_Winter_WW		Deciduous	Vaccinum	Leaf	0.896352	38.0581	156.816	-29.0125	0.38014	0.363926	0.0162131	S2	0.56	0.501957	8.13829e-05	0.145327	0.00361702
395	Southeastern	Late_Winter_WW		Deciduous	Vaccinum	Leaf	0.896352	38.0581	156.816	-29.0125	0.38014	0.363926	0.0162131	S6	4.76	4.26664	0.000691755	0.145327	0.0307447
396	Southeastern	Late_Winter_WW		Deciduous	Vaccinum	Leaf	0.896352	38.0581	156.816	-29.0125	0.38014	0.363926	0.0162131	S7	0.33	0.295796	4.79578e-05	0.145327	0.00213146
397	Southeastern	Late_Winter_WW		Deciduous	Vaccinum	Leaf	0.896352	38.0581	156.816	-29.0125	0.38014	0.363926	0.0162131	S8	0.95	0.851535	0.00013806	0.145327	0.00613601
417	Southeastern	Early_Winter		Deciduous	Vaccinum	Stem	1.05627	48.1561	673.411	-29.2828	0.383823	0.363926	0.0198968	S2	3.53	3.72863	0.000741879	0.210164	0.0329724
418	Southeastern	Early_Winter		Deciduous	Vaccinum	Stem	1.05627	48.1561	673.411	-29.2828	0.383823	0.363926	0.0198968	S6	20.73	21.8964	0.0043567	0.210164	0.193631
419	Southeastern	Early_Winter		Deciduous	Vaccinum	Stem	1.05627	48.1561	673.411	-29.2828	0.383823	0.363926	0.0198968	S7	3.03	3.20049	0.000636797	0.210164	0.0283021
420	Southeastern	Early_Winter		Deciduous	Vaccinum	Stem	1.05627	48.1561	673.411	-29.2828	0.383823	0.363926	0.0198968	S8	15.38	16.2454	0.00323232	0.210164	0.143659
440	Southeastern	Midwinter_I		Deciduous	Vaccinum	Stem	0.986125	37.7637	18.867	-27.3399	0.380032	0.363926	0.0161057	S2	3.53	3.48102	0.000560643	0.158822	0.0249175
441	Southeastern	Midwinter_I		Deciduous	Vaccinum	Stem	0.986125	37.7637	18.867	-27.3399	0.380032	0.363926	0.0161057	S6	20.73	20.4424	0.00329239	0.158822	0.146328
442	Southeastern	Midwinter_I		Deciduous	Vaccinum	Stem	0.986125	37.7637	18.867	-27.3399	0.380032	0.363926	0.0161057	S7	3.03	2.98796	0.000481232	0.158822	0.0213881
443	Southeastern	Midwinter_I		Deciduous	Vaccinum	Stem	0.986125	37.7637	18.867	-27.3399	0.380032	0.363926	0.0161057	S8	15.38	15.1666	0.00244269	0.158822	0.108564
463	Southeastern	Midwinter_II		Deciduous	Vaccinum	Stem	1.28229	47.8512	17.245	-28.2519	0.383712	0.363926	0.0197856	S2	3.53	4.5265	0.000895596	0.25371	0.0398043
464	Southeastern	Midwinter_II		Deciduous	Vaccinum	Stem	1.28229	47.8512	17.245	-28.2519	0.383712	0.363926	0.0197856	S6	20.73	26.582	0.00525941	0.25371	0.233751
465	Southeastern	Midwinter_II		Deciduous	Vaccinum	Stem	1.28229	47.8512	17.245	-28.2519	0.383712	0.363926	0.0197856	S7	3.03	3.88535	0.000768741	0.25371	0.0341663
466	Southeastern	Midwinter_II		Deciduous	Vaccinum	Stem	1.28229	47.8512	17.245	-28.2519	0.383712	0.363926	0.0197856	S8	15.38	19.7217	0.00390206	0.25371	0.173425
486	Southeastern	Late_Winter_C		Deciduous	Vaccinum	Stem						0.363926		S2	3.53
487	Southeastern	Late_Winter_C		Deciduous	Vaccinum	Stem						0.363926		S6	20.73
488	Southeastern	Late_Winter_C		Deciduous	Vaccinum	Stem						0.363926		S7	3.03
489	Southeastern	Late_Winter_C		Deciduous	Vaccinum	Stem						0.363926		S8	15.38
509	Southeastern	Late_Winter_WW		Deciduous	Vaccinum	Stem	1.47247	52.7602	19.444	-28.5115	0.385503	0.363926	0.0215763	S2	3.53	5.19781	0.0011215	0.317704	0.0498442
510	Southeastern	Late_Winter_WW		Deciduous	Vaccinum	Stem	1.47247	52.7602	19.444	-28.5115	0.385503	0.363926	0.0215763	S6	20.73	30.5243	0.00658601	0.317704	0.292711
511	Southeastern	Late_Winter_WW		Deciduous	Vaccinum	Stem	1.47247	52.7602	19.444	-28.5115	0.385503	0.363926	0.0215763	S7	3.03	4.46158	0.000962643	0.317704	0.0427842
512	Southeastern	Late_Winter_WW		Deciduous	Vaccinum	Stem	1.47247	52.7602	19.444	-28.5115	0.385503	0.363926	0.0215763	S8	15.38	22.6466	0.00488629	0.317704	0.217168
528	Southeastern	Early_Winter		Deciduous	Salix	Leaf	1.75385	46.3282	6.624	-27.2438	0.383157	0.365374	0.0177828	S3	0.81	1.42062	0.000252627	0.311885	0.0112278
529	Southeastern	Early_Winter		Deciduous	Salix	Leaf	1.75385	46.3282	6.624	-27.2438	0.383157	0.365374	0.0177828	S4	0.72	1.26277	0.000224557	0.311885	0.00998031
530	Southeastern	Early_Winter		Deciduous	Salix	Leaf	1.75385	46.3282	6.624	-27.2438	0.383157	0.365374	0.0177828	S7	0.08	0.140308	2.49508e-05	0.311885	0.00110892
546	Southeastern	Midwinter_I		Deciduous	Salix	Leaf	1.91481	45.6074	101.156	-26.9859	0.382894	0.365374	0.0175199	S3	0.81	1.551	0.000271733	0.335472	0.012077
547	Southeastern	Midwinter_I		Deciduous	Salix	Leaf	1.91481	45.6074	101.156	-26.9859	0.382894	0.365374	0.0175199	S4	0.72	1.37866	0.00024154	0.335472	0.0107351
548	Southeastern	Midwinter_I		Deciduous	Salix	Leaf	1.91481	45.6074	101.156	-26.9859	0.382894	0.365374	0.0175199	S7	0.08	0.153185	2.68378e-05	0.335472	0.00119279
564	Southeastern	Midwinter_II		Deciduous	Salix	Leaf	1.43809	41.1457	26.659	-27.5409	0.381266	0.365374	0.0158923	S3	0.81	1.16485	0.000185121	0.228545	0.00822762
565	Southeastern	Midwinter_II		Deciduous	Salix	Leaf	1.43809	41.1457	26.659	-27.5409	0.381266	0.365374	0.0158923	S4	0.72	1.03542	0.000164552	0.228545	0.00731344
566	Southeastern	Midwinter_II		Deciduous	Salix	Leaf	1.43809	41.1457	26.659	-27.5409	0.381266	0.365374	0.0158923	S7	0.08	0.115047	1.82836e-05	0.228545	0.000812604
582	Southeastern	Late_Winter_C		Deciduous	Salix	Leaf	1.83816	49.7019	5.001	-26.7385	0.384387	0.365374	0.0190135	S3	0.81	1.48891	0.000283093	0.349498	0.0125819
583	Southeastern	Late_Winter_C		Deciduous	Salix	Leaf	1.83816	49.7019	5.001	-26.7385	0.384387	0.365374	0.0190135	S4	0.72	1.32347	0.000251638	0.349498	0.0111839
584	Southeastern	Late_Winter_C		Deciduous	Salix	Leaf	1.83816	49.7019	5.001	-26.7385	0.384387	0.365374	0.0190135	S7	0.08	0.147052	2.79598e-05	0.349498	0.00124266
600	Southeastern	Late_Winter_WW		Deciduous	Salix	Leaf	1.54509	41.1337	12.038	-28.3865	0.381262	0.365374	0.0158879	S3	0.81	1.25152	0.00019884	0.245482	0.00883734
601	Southeastern	Late_Winter_WW		Deciduous	Salix	Leaf	1.54509	41.1337	12.038	-28.3865	0.381262	0.365374	0.0158879	S4	0.72	1.11246	0.000176747	0.245482	0.00785541
602	Southeastern	Late_Winter_WW		Deciduous	Salix	Leaf	1.54509	41.1337	12.038	-28.3865	0.381262	0.365374	0.0158879	S7	0.08	0.123607	1.96385e-05	0.245482	0.000872824
619	Southeastern	Early_Winter		Deciduous	Salix	Stem	1.2214	49.997	92.825	-27.8448	0.384495	0.365374	0.0191211	S1	0.27	0.329779	6.30574e-05	0.233546	0.00280255
620	Southeastern	Early_Winter		Deciduous	Salix	Stem	1.2214	49.997	92.825	-27.8448	0.384495	0.365374	0.0191211	S3	17.96	21.9364	0.00419449	0.233546	0.186422
621	Southeastern	Early_Winter		Deciduous	Salix	Stem	1.2214	49.997	92.825	-27.8448	0.384495	0.365374	0.0191211	S4	4.58	5.59403	0.00106964	0.233546	0.0475396
622	Southeastern	Early_Winter		Deciduous	Salix	Stem	1.2214	49.997	92.825	-27.8448	0.384495	0.365374	0.0191211	S7	1.77	2.16188	0.000413376	0.233546	0.0183723
639	Southeastern	Midwinter_I		Deciduous	Salix	Stem	0.859693	47.3491	12.115	-27.4669	0.383529	0.365374	0.0181552	S1	0.27	0.232117	4.21414e-05	0.156079	0.00187295
640	Southeastern	Midwinter_I		Deciduous	Salix	Stem	0.859693	47.3491	12.115	-27.4669	0.383529	0.365374	0.0181552	S3	17.96	15.4401	0.00280318	0.156079	0.124586
641	Southeastern	Midwinter_I		Deciduous	Salix	Stem	0.859693	47.3491	12.115	-27.4669	0.383529	0.365374	0.0181552	S4	4.58	3.93739	0.000714843	0.156079	0.0317708
642	Southeastern	Midwinter_I		Deciduous	Salix	Stem	0.859693	47.3491	12.115	-27.4669	0.383529	0.365374	0.0181552	S7	1.77	1.52166	0.00027626	0.156079	0.0122782
659	Southeastern	Midwinter_II		Deciduous	Salix	Stem	0.505998	39.1984	12.529	-29.6319	0.380556	0.365374	0.0151819	S1	0.27	0.13662	2.07414e-05	0.0768202	0.000921842
660	Southeastern	Midwinter_II		Deciduous	Salix	Stem	0.505998	39.1984	12.529	-29.6319	0.380556	0.365374	0.0151819	S3	17.96	9.08773	0.00137969	0.0768202	0.0613196
661	Southeastern	Midwinter_II		Deciduous	Salix	Stem	0.505998	39.1984	12.529	-29.6319	0.380556	0.365374	0.0151819	S4	4.58	2.31747	0.000351836	0.0768202	0.0156372
662	Southeastern	Midwinter_II		Deciduous	Salix	Stem	0.505998	39.1984	12.529	-29.6319	0.380556	0.365374	0.0151819	S7	1.77	0.895617	0.000135972	0.0768202	0.00604319
679	Southeastern	Late_Winter_C		Deciduous	Salix	Stem	0.890805	44.3017	2.09	-26.3025	0.382417	0.365374	0.0170436	S1	0.27	0.240517	4.09927e-05	0.151825	0.0018219
680	Southeastern	Late_Winter_C		Deciduous	Salix	Stem	0.890805	44.3017	2.09	-26.3025	0.382417	0.365374	0.0170436	S3	17.96	15.9989	0.00272678	0.151825	0.12119
681	Southeastern	Late_Winter_C		Deciduous	Salix	Stem	0.890805	44.3017	2.09	-26.3025	0.382417	0.365374	0.0170436	S4	4.58	4.07989	0.000695358	0.151825	0.0309048
682	Southeastern	Late_Winter_C		Deciduous	Salix	Stem	0.890805	44.3017	2.09	-26.3025	0.382417	0.365374	0.0170436	S7	1.77	1.57672	0.00026873	0.151825	0.0119436
699	Southeastern	Late_Winter_WW		Deciduous	Salix	Stem	0.644294	42.5385	134.158	-29.3595	0.381774	0.365374	0.0164004	S1	0.27	0.173959	2.853e-05	0.105667	0.001268
700	Southeastern	Late_Winter_WW		Deciduous	Salix	Stem	0.644294	42.5385	134.158	-29.3595	0.381774	0.365374	0.0164004	S3	17.96	11.5715	0.00189777	0.105667	0.0843454
701	Southeastern	Late_Winter_WW		Deciduous	Salix	Stem	0.644294	42.5385	134.158	-29.3595	0.381774	0.365374	0.0164004	S4	4.58	2.95086	0.000483953	0.105667	0.021509
702	Southeastern	Late_Winter_WW		Deciduous	Salix	Stem	0.644294	42.5385	134.158	-29.3595	0.381774	0.365374	0.0164004	S7	1.77	1.1404	0.00018703	0.105667	0.00831244
717	Southeastern	Early_Winter		Deciduous	Grass	Leaf	1.94489	43.4722	10392.4	-31.4728	0.382115	0.366373	0.015742	S1	1.43	2.7812	0.000437816	0.306165	0.0194585
718	Southeastern	Early_Winter		Deciduous	Grass	Leaf	1.94489	43.4722	10392.4	-31.4728	0.382115	0.366373	0.015742	S2	0.59	1.14749	0.000180637	0.306165	0.00802832
719	Southeastern	Early_Winter		Deciduous	Grass	Leaf	1.94489	43.4722	10392.4	-31.4728	0.382115	0.366373	0.015742	S3	1.5	2.91734	0.000459247	0.306165	0.020411
720	Southeastern	Early_Winter		Deciduous	Grass	Leaf	1.94489	43.4722	10392.4	-31.4728	0.382115	0.366373	0.015742	S5	5.9	11.4749	0.00180637	0.306165	0.0802832
721	Southeastern	Early_Winter		Deciduous	Grass	Leaf	1.94489	43.4722	10392.4	-31.4728	0.382115	0.366373	0.015742	S6	1.28	2.48946	0.000391891	0.306165	0.0174174
722	Southeastern	Early_Winter		Deciduous	Grass	Leaf	1.94489	43.4722	10392.4	-31.4728	0.382115	0.366373	0.015742	S7	0.62	1.20583	0.000189822	0.306165	0.00843654
723	Southeastern	Early_Winter		Deciduous	Grass	Leaf	1.94489	43.4722	10392.4	-31.4728	0.382115	0.366373	0.015742	S8	1.18	2.29497	0.000361274	0.306165	0.0160566
738	Southeastern	Midwinter_I		Deciduous	Grass	Leaf	2.52856	45.2377	8462.34	-33.6559	0.382759	0.366373	0.0163861	S1	1.43	3.61585	0.000592495	0.414332	0.0263331
739	Southeastern	Midwinter_I		Deciduous	Grass	Leaf	2.52856	45.2377	8462.34	-33.6559	0.382759	0.366373	0.0163861	S2	0.59	1.49185	0.000244456	0.414332	0.0108647
740	Southeastern	Midwinter_I		Deciduous	Grass	Leaf	2.52856	45.2377	8462.34	-33.6559	0.382759	0.366373	0.0163861	S3	1.5	3.79285	0.000621498	0.414332	0.0276221
741	Southeastern	Midwinter_I		Deciduous	Grass	Leaf	2.52856	45.2377	8462.34	-33.6559	0.382759	0.366373	0.0163861	S5	5.9	14.9185	0.00244456	0.414332	0.108647
742	Southeastern	Midwinter_I		Deciduous	Grass	Leaf	2.52856	45.2377	8462.34	-33.6559	0.382759	0.366373	0.0163861	S6	1.28	3.23656	0.000530345	0.414332	0.0235709
743	Southeastern	Midwinter_I		Deciduous	Grass	Leaf	2.52856	45.2377	8462.34	-33.6559	0.382759	0.366373	0.0163861	S7	0.62	1.56771	0.000256886	0.414332	0.0114172
744	Southeastern	Midwinter_I		Deciduous	Grass	Leaf	2.52856	45.2377	8462.34	-33.6559	0.382759	0.366373	0.0163861	S8	1.18	2.98371	0.000488912	0.414332	0.0217294
759	Southeastern	Midwinter_II		Deciduous	Grass	Leaf	3.06629	40.1695	16132	-38.3469	0.38091	0.366373	0.0145372	S1	1.43	4.3848	0.000637425	0.445752	0.02833
760	Southeastern	Midwinter_II		Deciduous	Grass	Leaf	3.06629	40.1695	16132	-38.3469	0.38091	0.366373	0.0145372	S2	0.59	1.80911	0.000262994	0.445752	0.0116886
761	Southeastern	Midwinter_II		Deciduous	Grass	Leaf	3.06629	40.1695	16132	-38.3469	0.38091	0.366373	0.0145372	S3	1.5	4.59944	0.000668628	0.445752	0.0297168
762	Southeastern	Midwinter_II		Deciduous	Grass	Leaf	3.06629	40.1695	16132	-38.3469	0.38091	0.366373	0.0145372	S5	5.9	18.0911	0.00262994	0.445752	0.116886
763	Southeastern	Midwinter_II		Deciduous	Grass	Leaf	3.06629	40.1695	16132	-38.3469	0.38091	0.366373	0.0145372	S6	1.28	3.92485	0.000570563	0.445752	0.0253583
764	Southeastern	Midwinter_II		Deciduous	Grass	Leaf	3.06629	40.1695	16132	-38.3469	0.38091	0.366373	0.0145372	S7	0.62	1.9011	0.000276366	0.445752	0.0122829
765	Southeastern	Midwinter_II		Deciduous	Grass	Leaf	3.06629	40.1695	16132	-38.3469	0.38091	0.366373	0.0145372	S8	1.18	3.61822	0.000525987	0.445752	0.0233772
780	Southeastern	Late_Winter_C		Deciduous	Grass	Leaf	1.91263	47.0837	6445.12	-30.2285	0.383432	0.366373	0.0170595	S1	1.43	2.73506	0.000466586	0.326284	0.0207372
781	Southeastern	Late_Winter_C		Deciduous	Grass	Leaf	1.91263	47.0837	6445.12	-30.2285	0.383432	0.366373	0.0170595	S2	0.59	1.12845	0.000192508	0.326284	0.0085559
782	Southeastern	Late_Winter_C		Deciduous	Grass	Leaf	1.91263	47.0837	6445.12	-30.2285	0.383432	0.366373	0.0170595	S3	1.5	2.86894	0.000489426	0.326284	0.0217523
783	Southeastern	Late_Winter_C		Deciduous	Grass	Leaf	1.91263	47.0837	6445.12	-30.2285	0.383432	0.366373	0.0170595	S5	5.9	11.2845	0.00192508	0.326284	0.085559
784	Southeastern	Late_Winter_C		Deciduous	Grass	Leaf	1.91263	47.0837	6445.12	-30.2285	0.383432	0.366373	0.0170595	S6	1.28	2.44816	0.000417644	0.326284	0.0185619
785	Southeastern	Late_Winter_C		Deciduous	Grass	Leaf	1.91263	47.0837	6445.12	-30.2285	0.383432	0.366373	0.0170595	S7	0.62	1.18583	0.000202296	0.326284	0.00899094
786	Southeastern	Late_Winter_C		Deciduous	Grass	Leaf	1.91263	47.0837	6445.12	-30.2285	0.383432	0.366373	0.0170595	S8	1.18	2.2569	0.000385015	0.326284	0.0171118
801	Southeastern	Late_Winter_WW		Deciduous	Grass	Leaf	3.17005	38.8827		-35.9715	0.38044	0.366373	0.0140678	S1	1.43	4.53317	0.000637716	0.445955	0.0283429
802	Southeastern	Late_Winter_WW		Deciduous	Grass	Leaf	3.17005	38.8827		-35.9715	0.38044	0.366373	0.0140678	S2	0.59	1.87033	0.000263114	0.445955	0.0116939
803	Southeastern	Late_Winter_WW		Deciduous	Grass	Leaf	3.17005	38.8827		-35.9715	0.38044	0.366373	0.0140678	S3	1.5	4.75508	0.000668933	0.445955	0.0297304
804	Southeastern	Late_Winter_WW		Deciduous	Grass	Leaf	3.17005	38.8827		-35.9715	0.38044	0.366373	0.0140678	S5	5.9	18.7033	0.00263114	0.445955	0.116939
805	Southeastern	Late_Winter_WW		Deciduous	Grass	Leaf	3.17005	38.8827		-35.9715	0.38044	0.366373	0.0140678	S6	1.28	4.05766	0.000570823	0.445955	0.0253699
806	Southeastern	Late_Winter_WW		Deciduous	Grass	Leaf	3.17005	38.8827		-35.9715	0.38044	0.366373	0.0140678	S7	0.62	1.96543	0.000276492	0.445955	0.0122885
807	Southeastern	Late_Winter_WW		Deciduous	Grass	Leaf	3.17005	38.8827		-35.9715	0.38044	0.366373	0.0140678	S8	1.18	3.74066	0.000526227	0.445955	0.0233879
828	Southeastern	Early_Winter		Moss	Moss	Leaf	0.56541	13.4628	146.04	-31.6358	0.371166	0.365431	0.0057347	S1	0.68	0.384479	2.20487e-05	0.0324246	0.000979943
829	Southeastern	Early_Winter		Moss	Moss	Leaf	0.56541	13.4628	146.04	-31.6358	0.371166	0.365431	0.0057347	S2	4.22	2.38603	0.000136832	0.0324246	0.00608141
830	Southeastern	Early_Winter		Moss	Moss	Leaf	0.56541	13.4628	146.04	-31.6358	0.371166	0.365431	0.0057347	S5	0.8	0.452328	2.59397e-05	0.0324246	0.00115287
854	Southeastern	Midwinter_I		Moss	Moss	Leaf	0.923498	32.9045	1049.85	-29.6719	0.378259	0.365431	0.012828	S1	0.68	0.627979	8.05573e-05	0.118467	0.00358032
855	Southeastern	Midwinter_I		Moss	Moss	Leaf	0.923498	32.9045	1049.85	-29.6719	0.378259	0.365431	0.012828	S2	4.22	3.89716	0.000499929	0.118467	0.0222191
856	Southeastern	Midwinter_I		Moss	Moss	Leaf	0.923498	32.9045	1049.85	-29.6719	0.378259	0.365431	0.012828	S5	0.8	0.738798	9.47732e-05	0.118467	0.00421214
880	Southeastern	Midwinter_II		Moss	Moss	Leaf	0.84914	26.3519	330.589	-30.2249	0.375869	0.365431	0.0104374	S1	0.68	0.577415	6.02671e-05	0.088628	0.00267854
881	Southeastern	Midwinter_II		Moss	Moss	Leaf	0.84914	26.3519	330.589	-30.2249	0.375869	0.365431	0.0104374	S2	4.22	3.58337	0.00037401	0.088628	0.0166227
882	Southeastern	Midwinter_II		Moss	Moss	Leaf	0.84914	26.3519	330.589	-30.2249	0.375869	0.365431	0.0104374	S5	0.8	0.679312	7.09024e-05	0.088628	0.00315122
906	Southeastern	Late_Winter_C		Moss	Moss	Leaf	1.60334	46.0649	393.101	-31.6585	0.38306	0.365431	0.017629	S1	0.68	1.09027	0.000192204	0.282653	0.00854239
907	Southeastern	Late_Winter_C		Moss	Moss	Leaf	1.60334	46.0649	393.101	-31.6585	0.38306	0.365431	0.017629	S2	4.22	6.76608	0.00119279	0.282653	0.0530131
908	Southeastern	Late_Winter_C		Moss	Moss	Leaf	1.60334	46.0649	393.101	-31.6585	0.38306	0.365431	0.017629	S5	0.8	1.28267	0.000226122	0.282653	0.0100499
932	Southeastern	Late_Winter_WW		Moss	Moss	Leaf	1.10926	27.6915	8976.83	-30.0165	0.376358	0.365431	0.0109261	S1	0.68	0.754296	8.24153e-05	0.121199	0.0036629
933	Southeastern	Late_Winter_WW		Moss	Moss	Leaf	1.10926	27.6915	8976.83	-30.0165	0.376358	0.365431	0.0109261	S2	4.22	4.68107	0.00051146	0.121199	0.0227315
934	Southeastern	Late_Winter_WW		Moss	Moss	Leaf	1.10926	27.6915	8976.83	-30.0165	0.376358	0.365431	0.0109261	S5	0.8	0.887407	9.69592e-05	0.121199	0.0043093
950	Southeastern	Early_Winter		Moss	Lichen	Leaf	0.679594	40.7217	53.225	-28.1248	0.381111	0.365577	0.0155339	S1	5.75	3.90767	0.000607014	0.105568	0.0269784
959	Southeastern	Early_Winter		Deciduous	Salix herbacea	Leaf	0.996403	46.3186	27.288	-31.3928	0.383153	0.364139	0.019014	S3	0.12	0.119568	2.27347e-05	0.189456	0.00101043
960	Southeastern	Early_Winter		Deciduous	Salix herbacea	Leaf	0.996403	46.3186	27.288	-31.3928	0.383153	0.364139	0.019014	S5	0.26	0.259065	4.92585e-05	0.189456	0.00218927
964	Southeastern	Midwinter_I		Deciduous	Salix herbacea	Leaf	2.09015	40.2981	1436.08	-28.6509	0.380957	0.364139	0.0168177	S3	0.12	0.250818	4.21818e-05	0.351515	0.00187474
965	Southeastern	Midwinter_I		Deciduous	Salix herbacea	Leaf	2.09015	40.2981	1436.08	-28.6509	0.380957	0.364139	0.0168177	S5	0.26	0.543438	9.13938e-05	0.351515	0.00406195
967					Betula							0.364901		nan
968					Cassiope							0.363407		nan
969					Dryas							0.365246		nan
970					Moslyng							0.364139		nan
971					Pileurt							0.3653		nan
1035					Dryas	Leaf								S6	0.046
1037					Dryas	Stem								S6	0.58
