# Supplementary material
Source: Research Square preprint supplement (doi:10.21203/rs.3.rs-9353987/v1)
Supplement: Supplementary file 3 [file 395c8a7f586d4c1b5a6b3e23.xlsx]

## Sheet: Sheet1
	Site	Winter_stage	Mesocosm_x	PFT	Species	Stem_leaf	N_percentage	d15N	C_Percentage	d13C	AT%_x	AT%_y	15NAPE%	Mesocosm_y	G_dryweight_total_mesocosm	Total_g_N_mesocosm	g_15N_APE_total_mesocosm	mg_15NAPE_per_g_dryweight_biomass	g_15N_APE_pr_m2
11	Southern	Early_Winter		Moss	Lichen	Leaf	0.629647	40.3989	121.923	-26.9008	0.380994	0.365577	0.0154162	F3	0.17	0.10704	1.65015e-05	0.0970675	0.000733399
12	Southern	Early_Winter		Moss	Lichen	Leaf	0.629647	40.3989	121.923	-26.9008	0.380994	0.365577	0.0154162	F4	0.95	0.598165	9.22141e-05	0.0970675	0.0040984
13	Southern	Early_Winter		Moss	Lichen	Leaf	0.629647	40.3989	121.923	-26.9008	0.380994	0.365577	0.0154162	F5	0.32	0.201487	3.10616e-05	0.0970675	0.00138051
14	Southern	Early_Winter		Moss	Lichen	Leaf	0.629647	40.3989	121.923	-26.9008	0.380994	0.365577	0.0154162	F6	2.44	1.53634	0.000236845	0.0970675	0.0105264
15	Southern	Early_Winter		Moss	Lichen	Leaf	0.629647	40.3989	121.923	-26.9008	0.380994	0.365577	0.0154162	F7	3.13	1.9708	0.000303821	0.0970675	0.0135032
16	Southern	Early_Winter		Moss	Lichen	Leaf	0.629647	40.3989	121.923	-26.9008	0.380994	0.365577	0.0154162	F8	0.41	0.258155	3.97977e-05	0.0970675	0.00176878
28	Southern	Midwinter_I		Moss	Lichen	Leaf	0.386615	37.9256	141.208	-26.2999	0.380091	0.365577	0.0145139	F3	0.17	0.0657246	9.5392e-06	0.056113	0.000423965
29	Southern	Midwinter_I		Moss	Lichen	Leaf	0.386615	37.9256	141.208	-26.2999	0.380091	0.365577	0.0145139	F4	0.95	0.367284	5.33073e-05	0.056113	0.00236921
30	Southern	Midwinter_I		Moss	Lichen	Leaf	0.386615	37.9256	141.208	-26.2999	0.380091	0.365577	0.0145139	F5	0.32	0.123717	1.79561e-05	0.056113	0.000798051
31	Southern	Midwinter_I		Moss	Lichen	Leaf	0.386615	37.9256	141.208	-26.2999	0.380091	0.365577	0.0145139	F6	2.44	0.943341	0.000136916	0.056113	0.00608514
32	Southern	Midwinter_I		Moss	Lichen	Leaf	0.386615	37.9256	141.208	-26.2999	0.380091	0.365577	0.0145139	F7	3.13	1.21011	0.000175634	0.056113	0.00780594
33	Southern	Midwinter_I		Moss	Lichen	Leaf	0.386615	37.9256	141.208	-26.2999	0.380091	0.365577	0.0145139	F8	0.41	0.158512	2.30063e-05	0.056113	0.0010225
45	Southern	Midwinter_II		Moss	Lichen	Leaf	0.441241	39.2656	109.39	-25.7539	0.38058	0.365577	0.0150027	F3	0.17	0.075011	1.12537e-05	0.0661982	0.000500164
46	Southern	Midwinter_II		Moss	Lichen	Leaf	0.441241	39.2656	109.39	-25.7539	0.38058	0.365577	0.0150027	F4	0.95	0.419179	6.28883e-05	0.0661982	0.00279503
47	Southern	Midwinter_II		Moss	Lichen	Leaf	0.441241	39.2656	109.39	-25.7539	0.38058	0.365577	0.0150027	F5	0.32	0.141197	2.11834e-05	0.0661982	0.000941485
48	Southern	Midwinter_II		Moss	Lichen	Leaf	0.441241	39.2656	109.39	-25.7539	0.38058	0.365577	0.0150027	F6	2.44	1.07663	0.000161524	0.0661982	0.00717883
49	Southern	Midwinter_II		Moss	Lichen	Leaf	0.441241	39.2656	109.39	-25.7539	0.38058	0.365577	0.0150027	F7	3.13	1.38109	0.0002072	0.0661982	0.0092089
50	Southern	Midwinter_II		Moss	Lichen	Leaf	0.441241	39.2656	109.39	-25.7539	0.38058	0.365577	0.0150027	F8	0.41	0.180909	2.71413e-05	0.0661982	0.00120628
62	Southern	Late_Winter_C		Moss	Lichen	Leaf	0.365975	37.8147	86.623	-25.4355	0.380051	0.365577	0.0144734	F3	0.17	0.0622157	9.00475e-06	0.0529691	0.000400211
63	Southern	Late_Winter_C		Moss	Lichen	Leaf	0.365975	37.8147	86.623	-25.4355	0.380051	0.365577	0.0144734	F4	0.95	0.347676	5.03207e-05	0.0529691	0.00223647
64	Southern	Late_Winter_C		Moss	Lichen	Leaf	0.365975	37.8147	86.623	-25.4355	0.380051	0.365577	0.0144734	F5	0.32	0.117112	1.69501e-05	0.0529691	0.000753338
65	Southern	Late_Winter_C		Moss	Lichen	Leaf	0.365975	37.8147	86.623	-25.4355	0.380051	0.365577	0.0144734	F6	2.44	0.892979	0.000129245	0.0529691	0.00574421
66	Southern	Late_Winter_C		Moss	Lichen	Leaf	0.365975	37.8147	86.623	-25.4355	0.380051	0.365577	0.0144734	F7	3.13	1.1455	0.000165793	0.0529691	0.00736859
67	Southern	Late_Winter_C		Moss	Lichen	Leaf	0.365975	37.8147	86.623	-25.4355	0.380051	0.365577	0.0144734	F8	0.41	0.15005	2.17173e-05	0.0529691	0.000965215
80	Southern	Early_Winter		Deciduous	Salix herbacea	Leaf	1.97224	48.1948	19.173	-30.2268	0.383837	0.364139	0.0196984	F6	0.97	1.91308	0.000376845	0.3885	0.0167487
85	Southern	Midwinter_I		Deciduous	Salix herbacea	Leaf	1.45109	43.0253	16.959	-29.3969	0.381952	0.364139	0.0178126	F6	0.97	1.40756	0.000250722	0.258476	0.0111432
90	Southern	Midwinter_II		Deciduous	Salix herbacea	Leaf	1.62054	42.2288	28.925	-29.4849	0.381661	0.364139	0.017522	F6	0.97	1.57192	0.000275433	0.283951	0.0122415
95	Southern	Late_Winter_C		Deciduous	Salix herbacea	Leaf	1.27254	36.0613	18.288	-29.1995	0.379411	0.364139	0.0152721	F6	0.97	1.23436	0.000188513	0.194343	0.00837834
100	Southern	Late_Winter_WW		Deciduous	Salix herbacea	Leaf						0.364139		F6	0.97
117	Southern	Early_Winter		Deciduous	Salix	Leaf	2.24468	47.4483	10.072	-27.7688	0.383565	0.365374	0.0181914	F3	1.16	2.60383	0.000473674	0.40834	0.0210522
118	Southern	Early_Winter		Deciduous	Salix	Leaf	2.24468	47.4483	10.072	-27.7688	0.383565	0.365374	0.0181914	F4	0.02	0.0448937	8.16679e-06	0.40834	0.000362969
135	Southern	Midwinter_I		Deciduous	Salix	Leaf	2.6485	42.9513	5.596	-27.5709	0.381925	0.365374	0.016551	F3	1.16	3.07226	0.000508488	0.438351	0.0225995
136	Southern	Midwinter_I		Deciduous	Salix	Leaf	2.6485	42.9513	5.596	-27.5709	0.381925	0.365374	0.016551	F4	0.02	0.0529699	8.76703e-06	0.438351	0.000389646
153	Southern	Midwinter_II		Deciduous	Salix	Leaf	2.7185	40.5043	6.047	-27.7719	0.381032	0.365374	0.0156583	F3	1.16	3.15346	0.000493778	0.425671	0.0219457
154	Southern	Midwinter_II		Deciduous	Salix	Leaf	2.7185	40.5043	6.047	-27.7719	0.381032	0.365374	0.0156583	F4	0.02	0.05437	8.51342e-06	0.425671	0.000378374
171	Southern	Late_Winter_C		Deciduous	Salix	Leaf	3.27984	45.9065	8.89	-27.9515	0.383003	0.365374	0.017629	F3	1.16	3.80461	0.000670716	0.578203	0.0298096
172	Southern	Late_Winter_C		Deciduous	Salix	Leaf	3.27984	45.9065	8.89	-27.9515	0.383003	0.365374	0.017629	F4	0.02	0.0655968	1.15641e-05	0.578203	0.000513958
189	Southern	Late_Winter_WW		Deciduous	Salix	Leaf	1.87816	42.3185	12.784	-27.2365	0.381694	0.365374	0.0163201	F3	1.16	2.17866	0.000355559	0.306517	0.0158026
190	Southern	Late_Winter_WW		Deciduous	Salix	Leaf	1.87816	42.3185	12.784	-27.2365	0.381694	0.365374	0.0163201	F4	0.02	0.0375631	6.13033e-06	0.306517	0.000272459
209	Southern	Early_Winter		Deciduous	Salix	Stem	1.73129	49.5916	12.768	-27.1928	0.384347	0.365374	0.0189733	F3	9.07	15.7028	0.00297934	0.328482	0.132415
210	Southern	Early_Winter		Deciduous	Salix	Stem	1.73129	49.5916	12.768	-27.1928	0.384347	0.365374	0.0189733	F4	0.42	0.727142	0.000137963	0.328482	0.00613167
229	Southern	Midwinter_I		Deciduous	Salix	Stem	1.69888	47.6078	11.189	-27.9119	0.383623	0.365374	0.0182496	F3	9.07	15.4088	0.00281205	0.310039	0.12498
230	Southern	Midwinter_I		Deciduous	Salix	Stem	1.69888	47.6078	11.189	-27.9119	0.383623	0.365374	0.0182496	F4	0.42	0.713529	0.000130216	0.310039	0.00578739
249	Southern	Midwinter_II		Deciduous	Salix	Stem	1.79801	50.6056	12.338	-28.0189	0.384717	0.365374	0.0193431	F3	9.07	16.3079	0.00315447	0.347791	0.140198
250	Southern	Midwinter_II		Deciduous	Salix	Stem	1.79801	50.6056	12.338	-28.0189	0.384717	0.365374	0.0193431	F4	0.42	0.755163	0.000146072	0.347791	0.0064921
269	Southern	Late_Winter_C		Deciduous	Salix	Stem	2.02062	47.6873	12.066	-27.7705	0.383652	0.365374	0.0182786	F3	9.07	18.3271	0.00334993	0.369342	0.148886
270	Southern	Late_Winter_C		Deciduous	Salix	Stem	2.02062	47.6873	12.066	-27.7705	0.383652	0.365374	0.0182786	F4	0.42	0.848662	0.000155124	0.369342	0.00689438
289	Southern	Late_Winter_WW		Deciduous	Salix	Stem	1.92469	48.3208	17.922	-26.5805	0.383883	0.365374	0.0185097	F3	9.07	17.4569	0.00323122	0.356254	0.14361
290	Southern	Late_Winter_WW		Deciduous	Salix	Stem	1.92469	48.3208	17.922	-26.5805	0.383883	0.365374	0.0185097	F4	0.42	0.808368	0.000149627	0.356254	0.00665007
311	Southern	Early_Winter		Evergreen	Empetrum	Leaf	0.940911	51.9348	21.648	-27.6848	0.385202	0.36287	0.0223314	F1	6.7	6.3041	0.00140779	0.210118	0.0625686
312	Southern	Early_Winter		Evergreen	Empetrum	Leaf	0.940911	51.9348	21.648	-27.6848	0.385202	0.36287	0.0223314	F2	12.87	12.1095	0.00270422	0.210118	0.120188
313	Southern	Early_Winter		Evergreen	Empetrum	Leaf	0.940911	51.9348	21.648	-27.6848	0.385202	0.36287	0.0223314	F3	9.56	8.99511	0.00200873	0.210118	0.089277
314	Southern	Early_Winter		Evergreen	Empetrum	Leaf	0.940911	51.9348	21.648	-27.6848	0.385202	0.36287	0.0223314	F4	5.51	5.18442	0.00115775	0.210118	0.0514557
315	Southern	Early_Winter		Evergreen	Empetrum	Leaf	0.940911	51.9348	21.648	-27.6848	0.385202	0.36287	0.0223314	F5	9.05	8.51524	0.00190157	0.210118	0.0845143
316	Southern	Early_Winter		Evergreen	Empetrum	Leaf	0.940911	51.9348	21.648	-27.6848	0.385202	0.36287	0.0223314	F6	3.62	3.4061	0.000760629	0.210118	0.0338057
317	Southern	Early_Winter		Evergreen	Empetrum	Leaf	0.940911	51.9348	21.648	-27.6848	0.385202	0.36287	0.0223314	F7	8.36	7.86602	0.00175659	0.210118	0.0780707
318	Southern	Early_Winter		Evergreen	Empetrum	Leaf	0.940911	51.9348	21.648	-27.6848	0.385202	0.36287	0.0223314	F8	10.04	9.44675	0.00210959	0.210118	0.0937595
339	Southern	Midwinter_I		Evergreen	Empetrum	Leaf	0.739134	47.518	34.894	-27.3379	0.383591	0.36287	0.0207202	F1	6.7	4.9522	0.00102611	0.15315	0.0456047
340	Southern	Midwinter_I		Evergreen	Empetrum	Leaf	0.739134	47.518	34.894	-27.3379	0.383591	0.36287	0.0207202	F2	12.87	9.51265	0.00197104	0.15315	0.0876019
341	Southern	Midwinter_I		Evergreen	Empetrum	Leaf	0.739134	47.518	34.894	-27.3379	0.383591	0.36287	0.0207202	F3	9.56	7.06612	0.00146412	0.15315	0.0650718
342	Southern	Midwinter_I		Evergreen	Empetrum	Leaf	0.739134	47.518	34.894	-27.3379	0.383591	0.36287	0.0207202	F4	5.51	4.07263	0.000843857	0.15315	0.0375048
343	Southern	Midwinter_I		Evergreen	Empetrum	Leaf	0.739134	47.518	34.894	-27.3379	0.383591	0.36287	0.0207202	F5	9.05	6.68916	0.00138601	0.15315	0.0616004
344	Southern	Midwinter_I		Evergreen	Empetrum	Leaf	0.739134	47.518	34.894	-27.3379	0.383591	0.36287	0.0207202	F6	3.62	2.67566	0.000554404	0.15315	0.0246402
345	Southern	Midwinter_I		Evergreen	Empetrum	Leaf	0.739134	47.518	34.894	-27.3379	0.383591	0.36287	0.0207202	F7	8.36	6.17916	0.00128034	0.15315	0.0569038
346	Southern	Midwinter_I		Evergreen	Empetrum	Leaf	0.739134	47.518	34.894	-27.3379	0.383591	0.36287	0.0207202	F8	10.04	7.4209	0.00153763	0.15315	0.068339
367	Southern	Midwinter_II		Evergreen	Empetrum	Leaf	1.08992	45.0608	22.761	-27.4439	0.382694	0.36287	0.0198239	F1	6.7	7.30249	0.00144764	0.216065	0.0643394
368	Southern	Midwinter_II		Evergreen	Empetrum	Leaf	1.08992	45.0608	22.761	-27.4439	0.382694	0.36287	0.0198239	F2	12.87	14.0273	0.00278076	0.216065	0.123589
369	Southern	Midwinter_II		Evergreen	Empetrum	Leaf	1.08992	45.0608	22.761	-27.4439	0.382694	0.36287	0.0198239	F3	9.56	10.4197	0.00206558	0.216065	0.0918036
370	Southern	Midwinter_II		Evergreen	Empetrum	Leaf	1.08992	45.0608	22.761	-27.4439	0.382694	0.36287	0.0198239	F4	5.51	6.00548	0.00119052	0.216065	0.0529119
371	Southern	Midwinter_II		Evergreen	Empetrum	Leaf	1.08992	45.0608	22.761	-27.4439	0.382694	0.36287	0.0198239	F5	9.05	9.86382	0.00195539	0.216065	0.0869061
372	Southern	Midwinter_II		Evergreen	Empetrum	Leaf	1.08992	45.0608	22.761	-27.4439	0.382694	0.36287	0.0198239	F6	3.62	3.94553	0.000782155	0.216065	0.0347625
373	Southern	Midwinter_II		Evergreen	Empetrum	Leaf	1.08992	45.0608	22.761	-27.4439	0.382694	0.36287	0.0198239	F7	8.36	9.11177	0.0018063	0.216065	0.0802801
374	Southern	Midwinter_II		Evergreen	Empetrum	Leaf	1.08992	45.0608	22.761	-27.4439	0.382694	0.36287	0.0198239	F8	10.04	10.9428	0.00216929	0.216065	0.096413
395	Southern	Late_Winter_C		Evergreen	Empetrum	Leaf	0.993758	45.6059	102.909	-27.1445	0.382893	0.36287	0.0200227	F1	6.7	6.65818	0.00133315	0.198977	0.059251
396	Southern	Late_Winter_C		Evergreen	Empetrum	Leaf	0.993758	45.6059	102.909	-27.1445	0.382893	0.36287	0.0200227	F2	12.87	12.7897	0.00256084	0.198977	0.113815
397	Southern	Late_Winter_C		Evergreen	Empetrum	Leaf	0.993758	45.6059	102.909	-27.1445	0.382893	0.36287	0.0200227	F3	9.56	9.50033	0.00190222	0.198977	0.0845432
398	Southern	Late_Winter_C		Evergreen	Empetrum	Leaf	0.993758	45.6059	102.909	-27.1445	0.382893	0.36287	0.0200227	F4	5.51	5.47561	0.00109636	0.198977	0.0487273
399	Southern	Late_Winter_C		Evergreen	Empetrum	Leaf	0.993758	45.6059	102.909	-27.1445	0.382893	0.36287	0.0200227	F5	9.05	8.99351	0.00180074	0.198977	0.0800331
400	Southern	Late_Winter_C		Evergreen	Empetrum	Leaf	0.993758	45.6059	102.909	-27.1445	0.382893	0.36287	0.0200227	F6	3.62	3.5974	0.000720298	0.198977	0.0320132
401	Southern	Late_Winter_C		Evergreen	Empetrum	Leaf	0.993758	45.6059	102.909	-27.1445	0.382893	0.36287	0.0200227	F7	8.36	8.30782	0.00166345	0.198977	0.0739311
402	Southern	Late_Winter_C		Evergreen	Empetrum	Leaf	0.993758	45.6059	102.909	-27.1445	0.382893	0.36287	0.0200227	F8	10.04	9.97733	0.00199773	0.198977	0.0887881
423	Southern	Late_Winter_WW		Evergreen	Empetrum	Leaf	1.16721	45.9091	124.184	-27.9305	0.383004	0.36287	0.0201333	F1	6.7	7.82034	0.00157449	0.234999	0.0699774
424	Southern	Late_Winter_WW		Evergreen	Empetrum	Leaf	1.16721	45.9091	124.184	-27.9305	0.383004	0.36287	0.0201333	F2	12.87	15.022	0.00302443	0.234999	0.134419
425	Southern	Late_Winter_WW		Evergreen	Empetrum	Leaf	1.16721	45.9091	124.184	-27.9305	0.383004	0.36287	0.0201333	F3	9.56	11.1586	0.00224659	0.234999	0.0998483
426	Southern	Late_Winter_WW		Evergreen	Empetrum	Leaf	1.16721	45.9091	124.184	-27.9305	0.383004	0.36287	0.0201333	F4	5.51	6.43135	0.00129484	0.234999	0.0575486
427	Southern	Late_Winter_WW		Evergreen	Empetrum	Leaf	1.16721	45.9091	124.184	-27.9305	0.383004	0.36287	0.0201333	F5	9.05	10.5633	0.00212674	0.234999	0.0945217
428	Southern	Late_Winter_WW		Evergreen	Empetrum	Leaf	1.16721	45.9091	124.184	-27.9305	0.383004	0.36287	0.0201333	F6	3.62	4.22532	0.000850695	0.234999	0.0378087
429	Southern	Late_Winter_WW		Evergreen	Empetrum	Leaf	1.16721	45.9091	124.184	-27.9305	0.383004	0.36287	0.0201333	F7	8.36	9.75791	0.00196459	0.234999	0.0873151
430	Southern	Late_Winter_WW		Evergreen	Empetrum	Leaf	1.16721	45.9091	124.184	-27.9305	0.383004	0.36287	0.0201333	F8	10.04	11.7188	0.00235939	0.234999	0.104862
452	Southern	Early_Winter		Evergreen	Empetrum	Stem	0.771615	51.1788	31.447	-27.9938	0.384926	0.36287	0.0220556	F1	7.32	5.64823	0.00124575	0.170184	0.0553667
453	Southern	Early_Winter		Evergreen	Empetrum	Stem	0.771615	51.1788	31.447	-27.9938	0.384926	0.36287	0.0220556	F2	15.28	11.7903	0.00260042	0.170184	0.115574
454	Southern	Early_Winter		Evergreen	Empetrum	Stem	0.771615	51.1788	31.447	-27.9938	0.384926	0.36287	0.0220556	F3	12.1	9.33655	0.00205923	0.170184	0.0915214
455	Southern	Early_Winter		Evergreen	Empetrum	Stem	0.771615	51.1788	31.447	-27.9938	0.384926	0.36287	0.0220556	F4	5.47	4.22074	0.000930909	0.170184	0.0413737
456	Southern	Early_Winter		Evergreen	Empetrum	Stem	0.771615	51.1788	31.447	-27.9938	0.384926	0.36287	0.0220556	F5	16	12.3458	0.00272295	0.170184	0.12102
457	Southern	Early_Winter		Evergreen	Empetrum	Stem	0.771615	51.1788	31.447	-27.9938	0.384926	0.36287	0.0220556	F6	2.42	1.86731	0.000411846	0.170184	0.0183043
458	Southern	Early_Winter		Evergreen	Empetrum	Stem	0.771615	51.1788	31.447	-27.9938	0.384926	0.36287	0.0220556	F7	13.78	10.6329	0.00234514	0.170184	0.104228
459	Southern	Early_Winter		Evergreen	Empetrum	Stem	0.771615	51.1788	31.447	-27.9938	0.384926	0.36287	0.0220556	F8	18.7	14.4292	0.00318245	0.170184	0.141442
481	Southern	Midwinter_I		Evergreen	Empetrum	Stem	0.634244	44.9906	23.255	-27.1769	0.382669	0.36287	0.0197982	F1	7.32	4.64266	0.000919165	0.125569	0.0408518
482	Southern	Midwinter_I		Evergreen	Empetrum	Stem	0.634244	44.9906	23.255	-27.1769	0.382669	0.36287	0.0197982	F2	15.28	9.69124	0.00191869	0.125569	0.0852753
483	Southern	Midwinter_I		Evergreen	Empetrum	Stem	0.634244	44.9906	23.255	-27.1769	0.382669	0.36287	0.0197982	F3	12.1	7.67435	0.00151938	0.125569	0.0675282
484	Southern	Midwinter_I		Evergreen	Empetrum	Stem	0.634244	44.9906	23.255	-27.1769	0.382669	0.36287	0.0197982	F4	5.47	3.46931	0.000686862	0.125569	0.0305272
485	Southern	Midwinter_I		Evergreen	Empetrum	Stem	0.634244	44.9906	23.255	-27.1769	0.382669	0.36287	0.0197982	F5	16	10.1479	0.0020091	0.125569	0.0892935
486	Southern	Midwinter_I		Evergreen	Empetrum	Stem	0.634244	44.9906	23.255	-27.1769	0.382669	0.36287	0.0197982	F6	2.42	1.53487	0.000303877	0.125569	0.0135056
487	Southern	Midwinter_I		Evergreen	Empetrum	Stem	0.634244	44.9906	23.255	-27.1769	0.382669	0.36287	0.0197982	F7	13.78	8.73988	0.00173034	0.125569	0.076904
488	Southern	Midwinter_I		Evergreen	Empetrum	Stem	0.634244	44.9906	23.255	-27.1769	0.382669	0.36287	0.0197982	F8	18.7	11.8604	0.00234814	0.125569	0.104362
510	Southern	Midwinter_II		Evergreen	Empetrum	Stem	0.74834	51.0699	45.145	-27.3929	0.384886	0.36287	0.0220159	F1	7.32	5.47785	0.001206	0.164754	0.0535998
511	Southern	Midwinter_II		Evergreen	Empetrum	Stem	0.74834	51.0699	45.145	-27.3929	0.384886	0.36287	0.0220159	F2	15.28	11.4346	0.00251743	0.164754	0.111886
512	Southern	Midwinter_II		Evergreen	Empetrum	Stem	0.74834	51.0699	45.145	-27.3929	0.384886	0.36287	0.0220159	F3	12.1	9.05492	0.00199352	0.164754	0.0886008
513	Southern	Midwinter_II		Evergreen	Empetrum	Stem	0.74834	51.0699	45.145	-27.3929	0.384886	0.36287	0.0220159	F4	5.47	4.09342	0.000901202	0.164754	0.0400534
514	Southern	Midwinter_II		Evergreen	Empetrum	Stem	0.74834	51.0699	45.145	-27.3929	0.384886	0.36287	0.0220159	F5	16	11.9734	0.00263606	0.164754	0.117158
515	Southern	Midwinter_II		Evergreen	Empetrum	Stem	0.74834	51.0699	45.145	-27.3929	0.384886	0.36287	0.0220159	F6	2.42	1.81098	0.000398704	0.164754	0.0177202
516	Southern	Midwinter_II		Evergreen	Empetrum	Stem	0.74834	51.0699	45.145	-27.3929	0.384886	0.36287	0.0220159	F7	13.78	10.3121	0.0022703	0.164754	0.100902
517	Southern	Midwinter_II		Evergreen	Empetrum	Stem	0.74834	51.0699	45.145	-27.3929	0.384886	0.36287	0.0220159	F8	18.7	13.994	0.00308089	0.164754	0.136929
539	Southern	Late_Winter_C		Evergreen	Empetrum	Stem	0.852829	46.9882	134.861	-27.3175	0.383397	0.36287	0.020527	F1	7.32	6.24271	0.00128144	0.17506	0.0569528
540	Southern	Late_Winter_C		Evergreen	Empetrum	Stem	0.852829	46.9882	134.861	-27.3175	0.383397	0.36287	0.020527	F2	15.28	13.0312	0.00267491	0.17506	0.118885
541	Southern	Late_Winter_C		Evergreen	Empetrum	Stem	0.852829	46.9882	134.861	-27.3175	0.383397	0.36287	0.020527	F3	12.1	10.3192	0.00211822	0.17506	0.0941433
542	Southern	Late_Winter_C		Evergreen	Empetrum	Stem	0.852829	46.9882	134.861	-27.3175	0.383397	0.36287	0.020527	F4	5.47	4.66497	0.000957577	0.17506	0.042559
543	Southern	Late_Winter_C		Evergreen	Empetrum	Stem	0.852829	46.9882	134.861	-27.3175	0.383397	0.36287	0.020527	F5	16	13.6453	0.00280096	0.17506	0.124487
544	Southern	Late_Winter_C		Evergreen	Empetrum	Stem	0.852829	46.9882	134.861	-27.3175	0.383397	0.36287	0.020527	F6	2.42	2.06385	0.000423645	0.17506	0.0188287
545	Southern	Late_Winter_C		Evergreen	Empetrum	Stem	0.852829	46.9882	134.861	-27.3175	0.383397	0.36287	0.020527	F7	13.78	11.752	0.00241232	0.17506	0.107214
546	Southern	Late_Winter_C		Evergreen	Empetrum	Stem	0.852829	46.9882	134.861	-27.3175	0.383397	0.36287	0.020527	F8	18.7	15.9479	0.00327362	0.17506	0.145494
568	Southern	Late_Winter_WW		Evergreen	Empetrum	Stem	0.844478	45.8482	2451.78	-27.8265	0.382981	0.36287	0.0201111	F1	7.32	6.18158	0.00124318	0.169834	0.0552526
569	Southern	Late_Winter_WW		Evergreen	Empetrum	Stem	0.844478	45.8482	2451.78	-27.8265	0.382981	0.36287	0.0201111	F2	15.28	12.9036	0.00259506	0.169834	0.115336
570	Southern	Late_Winter_WW		Evergreen	Empetrum	Stem	0.844478	45.8482	2451.78	-27.8265	0.382981	0.36287	0.0201111	F3	12.1	10.2182	0.00205499	0.169834	0.0913329
571	Southern	Late_Winter_WW		Evergreen	Empetrum	Stem	0.844478	45.8482	2451.78	-27.8265	0.382981	0.36287	0.0201111	F4	5.47	4.61929	0.000928991	0.169834	0.0412885
572	Southern	Late_Winter_WW		Evergreen	Empetrum	Stem	0.844478	45.8482	2451.78	-27.8265	0.382981	0.36287	0.0201111	F5	16	13.5116	0.00271734	0.169834	0.120771
573	Southern	Late_Winter_WW		Evergreen	Empetrum	Stem	0.844478	45.8482	2451.78	-27.8265	0.382981	0.36287	0.0201111	F6	2.42	2.04364	0.000410998	0.169834	0.0182666
574	Southern	Late_Winter_WW		Evergreen	Empetrum	Stem	0.844478	45.8482	2451.78	-27.8265	0.382981	0.36287	0.0201111	F7	13.78	11.6369	0.00234031	0.169834	0.104014
575	Southern	Late_Winter_WW		Evergreen	Empetrum	Stem	0.844478	45.8482	2451.78	-27.8265	0.382981	0.36287	0.0201111	F8	18.7	15.7917	0.00317589	0.169834	0.141151
597	Southern	Early_Winter		Deciduous	Vaccinum	Leaf	1.96492	45.6215	20.337	-30.1698	0.382899	0.363926	0.0189723	F2	0.9	1.76843	0.00033551	0.372789	0.0149116
598	Southern	Early_Winter		Deciduous	Vaccinum	Leaf	1.96492	45.6215	20.337	-30.1698	0.382899	0.363926	0.0189723	F4	0.9	1.76843	0.00033551	0.372789	0.0149116
620	Southern	Midwinter_I		Deciduous	Vaccinum	Leaf	1.21163	45.6158	28.808	-29.7489	0.382897	0.363926	0.0189702	F2	0.9	1.09047	0.000206864	0.229849	0.00919396
621	Southern	Midwinter_I		Deciduous	Vaccinum	Leaf	1.21163	45.6158	28.808	-29.7489	0.382897	0.363926	0.0189702	F4	0.9	1.09047	0.000206864	0.229849	0.00919396
643	Southern	Midwinter_II		Deciduous	Vaccinum	Leaf	1.31084	40.1281	36.793	-29.8059	0.380895	0.363926	0.0169683	F2	0.9	1.17975	0.000200184	0.222426	0.00889706
644	Southern	Midwinter_II		Deciduous	Vaccinum	Leaf	1.31084	40.1281	36.793	-29.8059	0.380895	0.363926	0.0169683	F4	0.9	1.17975	0.000200184	0.222426	0.00889706
666	Southern	Late_Winter_C		Deciduous	Vaccinum	Leaf	0.707314	38.0179	56.301	-31.3015	0.380125	0.363926	0.0161984	F2	0.9	0.636582	0.000103116	0.114574	0.00458295
667	Southern	Late_Winter_C		Deciduous	Vaccinum	Leaf	0.707314	38.0179	56.301	-31.3015	0.380125	0.363926	0.0161984	F4	0.9	0.636582	0.000103116	0.114574	0.00458295
689	Southern	Late_Winter_WW		Deciduous	Vaccinum	Leaf	0.897975	39.8533	337.812	-30.3945	0.380794	0.363926	0.016868	F2	0.9	0.808177	0.000136323	0.151471	0.00605882
690	Southern	Late_Winter_WW		Deciduous	Vaccinum	Leaf	0.897975	39.8533	337.812	-30.3945	0.380794	0.363926	0.016868	F4	0.9	0.808177	0.000136323	0.151471	0.00605882
712	Southern	Early_Winter		Deciduous	Vaccinum	Stem	1.27139	46.5229	7.8	-31.8918	0.383228	0.363926	0.0193011	F2	7.13	9.06504	0.00174965	0.245393	0.0777622
713	Southern	Early_Winter		Deciduous	Vaccinum	Stem	1.27139	46.5229	7.8	-31.8918	0.383228	0.363926	0.0193011	F4	7.6	9.6626	0.00186498	0.245393	0.0828882
735	Southern	Midwinter_I		Deciduous	Vaccinum	Stem	1.23956	50.2778	15.908	-29.0789	0.384597	0.363926	0.0206708	F2	7.13	8.83805	0.00182689	0.256226	0.0811953
736	Southern	Midwinter_I		Deciduous	Vaccinum	Stem	1.23956	50.2778	15.908	-29.0789	0.384597	0.363926	0.0206708	F4	7.6	9.42064	0.00194732	0.256226	0.0865476
758	Southern	Midwinter_II		Deciduous	Vaccinum	Stem	0.985081	44.2449	19.959	-28.7859	0.382397	0.363926	0.0184701	F2	7.13	7.02363	0.00129727	0.181945	0.0576564
759	Southern	Midwinter_II		Deciduous	Vaccinum	Stem	0.985081	44.2449	19.959	-28.7859	0.382397	0.363926	0.0184701	F4	7.6	7.48662	0.00138278	0.181945	0.061457
781	Southern	Late_Winter_C		Deciduous	Vaccinum	Stem	0.992988	50.3406	31.055	-31.7095	0.38462	0.363926	0.0206937	F2	7.13	7.08	0.00146511	0.205486	0.0651162
782	Southern	Late_Winter_C		Deciduous	Vaccinum	Stem	0.992988	50.3406	31.055	-31.7095	0.38462	0.363926	0.0206937	F4	7.6	7.54671	0.00156169	0.205486	0.0694086
804	Southern	Late_Winter_WW		Deciduous	Vaccinum	Stem	1.10655	51.8832	32.858	-29.5415	0.385183	0.363926	0.0212564	F2	7.13	7.88968	0.00167706	0.235212	0.0745361
805	Southern	Late_Winter_WW		Deciduous	Vaccinum	Stem	1.10655	51.8832	32.858	-29.5415	0.385183	0.363926	0.0212564	F4	7.6	8.40976	0.00178761	0.235212	0.0794494
811	Southern	Early_Winter		Deciduous	Betula	Leaf	1.36783	41.3469	23.886	-28.1208	0.381339	0.364901	0.0164385	F7	0.267	0.36521	6.00351e-05	0.224851	0.00266823
812	Southern	Early_Winter		Deciduous	Betula	Leaf	1.36783	41.3469	23.886	-28.1208	0.381339	0.364901	0.0164385	F8	0.7	0.957481	0.000157395	0.224851	0.00699535
818	Southern	Midwinter_I		Deciduous	Betula	Leaf	0.806399	37.6216	53.774	-28.2739	0.37998	0.364901	0.0150795	F7	0.267	0.215309	3.24674e-05	0.121601	0.001443
819	Southern	Midwinter_I		Deciduous	Betula	Leaf	0.806399	37.6216	53.774	-28.2739	0.37998	0.364901	0.0150795	F8	0.7	0.564479	8.51205e-05	0.121601	0.00378313
825	Southern	Midwinter_II		Deciduous	Betula	Leaf	2.10189	37.9525	9.203	-27.1879	0.380101	0.364901	0.0152002	F7	0.267	0.561205	8.53042e-05	0.319491	0.0037913
826	Southern	Midwinter_II		Deciduous	Betula	Leaf	2.10189	37.9525	9.203	-27.1879	0.380101	0.364901	0.0152002	F8	0.7	1.47132	0.000223644	0.319491	0.00993973
832	Southern	Late_Winter_C		Deciduous	Betula	Leaf	1.92902	56.2126	81.643	-28.4415	0.386762	0.364901	0.0218612	F7	0.267	0.515047	0.000112596	0.421707	0.00500425
833	Southern	Late_Winter_C		Deciduous	Betula	Leaf	1.92902	56.2126	81.643	-28.4415	0.386762	0.364901	0.0218612	F8	0.7	1.35031	0.000295195	0.421707	0.0131198
839	Southern	Late_Winter_WW		Deciduous	Betula	Leaf	1.68425	36.7098	13.207	-27.4765	0.379648	0.364901	0.0147468	F7	0.267	0.449694	6.63156e-05	0.248373	0.00294736
840	Southern	Late_Winter_WW		Deciduous	Betula	Leaf	1.68425	36.7098	13.207	-27.4765	0.379648	0.364901	0.0147468	F8	0.7	1.17897	0.000173861	0.248373	0.00772717
846	Southern	Early_Winter		Deciduous	Betula	Stem	1.6316	56.1851	10.772	-28.6858	0.386752	0.364901	0.0218512	F7	66.56	108.599	0.0237303	0.356524	1.05468
847	Southern	Early_Winter		Deciduous	Betula	Stem	1.6316	56.1851	10.772	-28.6858	0.386752	0.364901	0.0218512	F8	24.44	39.8763	0.00871345	0.356524	0.387265
853	Southern	Midwinter_I		Deciduous	Betula	Stem						0.364901		F7	66.56
854	Southern	Midwinter_I		Deciduous	Betula	Stem						0.364901		F8	24.44
860	Southern	Midwinter_II		Deciduous	Betula	Stem	1.8229	55.6365	9.28	-27.8299	0.386552	0.364901	0.0216511	F7	66.56	121.332	0.0262698	0.394678	1.16754
861	Southern	Midwinter_II		Deciduous	Betula	Stem	1.8229	55.6365	9.28	-27.8299	0.386552	0.364901	0.0216511	F8	24.44	44.5517	0.00964592	0.394678	0.428708
867	Southern	Late_Winter_C		Deciduous	Betula	Stem	1.57683	51.6007	36.533	-27.5355	0.38508	0.364901	0.020179	F7	66.56	104.954	0.0211786	0.318188	0.941271
868	Southern	Late_Winter_C		Deciduous	Betula	Stem	1.57683	51.6007	36.533	-27.5355	0.38508	0.364901	0.020179	F8	24.44	38.5377	0.00777651	0.318188	0.345623
874	Southern	Late_Winter_WW		Deciduous	Betula	Stem	1.39086	49.3032	9.518	-27.1495	0.384242	0.364901	0.0193409	F7	66.56	92.5756	0.017905	0.269005	0.795776
875	Southern	Late_Winter_WW		Deciduous	Betula	Stem	1.39086	49.3032	9.518	-27.1495	0.384242	0.364901	0.0193409	F8	24.44	33.9926	0.00657448	0.269005	0.292199
897	Southern	Early_Winter		Moss	Moss	Leaf	0.981303	41.0851	55.081	-30.6768	0.381244	0.365431	0.0158124	F3	0.026	0.0255139	4.03436e-06	0.155168	0.000179305
898	Southern	Early_Winter		Moss	Moss	Leaf	0.981303	41.0851	55.081	-30.6768	0.381244	0.365431	0.0158124	F4	5.92	5.80931	0.000918592	0.155168	0.0408263
899	Southern	Early_Winter		Moss	Moss	Leaf	0.981303	41.0851	55.081	-30.6768	0.381244	0.365431	0.0158124	F5	3.73	3.66026	0.000578775	0.155168	0.0257233
900	Southern	Early_Winter		Moss	Moss	Leaf	0.981303	41.0851	55.081	-30.6768	0.381244	0.365431	0.0158124	F6	0.27	0.264952	4.18953e-05	0.155168	0.00186201
901	Southern	Early_Winter		Moss	Moss	Leaf	0.981303	41.0851	55.081	-30.6768	0.381244	0.365431	0.0158124	F8	0.13	0.127569	2.01718e-05	0.155168	0.000896524
923	Southern	Midwinter_I		Moss	Moss	Leaf	0.806765	38.5451	48.919	-29.7159	0.380317	0.365431	0.0148858	F3	0.026	0.0209759	3.12243e-06	0.120093	0.000138775
924	Southern	Midwinter_I		Moss	Moss	Leaf	0.806765	38.5451	48.919	-29.7159	0.380317	0.365431	0.0148858	F4	5.92	4.77605	0.000710953	0.120093	0.0315979
925	Southern	Midwinter_I		Moss	Moss	Leaf	0.806765	38.5451	48.919	-29.7159	0.380317	0.365431	0.0148858	F5	3.73	3.00923	0.000447948	0.120093	0.0199088
926	Southern	Midwinter_I		Moss	Moss	Leaf	0.806765	38.5451	48.919	-29.7159	0.380317	0.365431	0.0148858	F6	0.27	0.217826	3.24252e-05	0.120093	0.00144112
927	Southern	Midwinter_I		Moss	Moss	Leaf	0.806765	38.5451	48.919	-29.7159	0.380317	0.365431	0.0148858	F8	0.13	0.104879	1.56121e-05	0.120093	0.000693873
949	Southern	Midwinter_II		Moss	Moss	Leaf	0.887607	36.939	101.11	-29.5959	0.379731	0.365431	0.0142999	F3	0.026	0.0230778	3.30009e-06	0.126927	0.000146671
950	Southern	Midwinter_II		Moss	Moss	Leaf	0.887607	36.939	101.11	-29.5959	0.379731	0.365431	0.0142999	F4	5.92	5.25464	0.000751405	0.126927	0.0333958
951	Southern	Midwinter_II		Moss	Moss	Leaf	0.887607	36.939	101.11	-29.5959	0.379731	0.365431	0.0142999	F5	3.73	3.31078	0.000473436	0.126927	0.0210416
952	Southern	Midwinter_II		Moss	Moss	Leaf	0.887607	36.939	101.11	-29.5959	0.379731	0.365431	0.0142999	F6	0.27	0.239654	3.42702e-05	0.126927	0.00152312
953	Southern	Midwinter_II		Moss	Moss	Leaf	0.887607	36.939	101.11	-29.5959	0.379731	0.365431	0.0142999	F8	0.13	0.115389	1.65005e-05	0.126927	0.000733353
975	Southern	Late_Winter_C		Moss	Moss	Leaf						0.365431		F3	0.026
976	Southern	Late_Winter_C		Moss	Moss	Leaf						0.365431		F4	5.92
977	Southern	Late_Winter_C		Moss	Moss	Leaf						0.365431		F5	3.73
978	Southern	Late_Winter_C		Moss	Moss	Leaf						0.365431		F6	0.27
979	Southern	Late_Winter_C		Moss	Moss	Leaf						0.365431		F8	0.13
1001	Southern	Late_Winter_WW		Moss	Moss	Leaf	1.33266	42.5558	30.554	-29.1235	0.38178	0.365431	0.0163489	F3	0.026	0.0346492	5.66476e-06	0.217876	0.000251767
1002	Southern	Late_Winter_WW		Moss	Moss	Leaf	1.33266	42.5558	30.554	-29.1235	0.38178	0.365431	0.0163489	F4	5.92	7.88935	0.00128982	0.217876	0.0573255
1003	Southern	Late_Winter_WW		Moss	Moss	Leaf	1.33266	42.5558	30.554	-29.1235	0.38178	0.365431	0.0163489	F5	3.73	4.97082	0.000812676	0.217876	0.0361189
1004	Southern	Late_Winter_WW		Moss	Moss	Leaf	1.33266	42.5558	30.554	-29.1235	0.38178	0.365431	0.0163489	F6	0.27	0.359818	5.88264e-05	0.217876	0.00261451
1005	Southern	Late_Winter_WW		Moss	Moss	Leaf	1.33266	42.5558	30.554	-29.1235	0.38178	0.365431	0.0163489	F8	0.13	0.173246	2.83238e-05	0.217876	0.00125884
1025	Southern	Early_Winter		Deciduous	Grass	Leaf	1.41725	42.8133	28.77	-27.4648	0.381874	0.366373	0.0155016	F4	6.37	9.02786	0.00139947	0.219696	0.0621985
1026	Southern	Early_Winter		Deciduous	Grass	Leaf	1.41725	42.8133	28.77	-27.4648	0.381874	0.366373	0.0155016	F5	1.32	1.87076	0.000289999	0.219696	0.0128889
1046	Southern	Midwinter_I		Deciduous	Grass	Leaf	1.42442	43.786	21.163	-26.6329	0.382229	0.366373	0.0158565	F4	6.37	9.07353	0.00143874	0.225862	0.0639441
1047	Southern	Midwinter_I		Deciduous	Grass	Leaf	1.42442	43.786	21.163	-26.6329	0.382229	0.366373	0.0158565	F5	1.32	1.88023	0.000298138	0.225862	0.0132506
1067	Southern	Midwinter_II		Deciduous	Grass	Leaf	0.752035	42.8031	334.3	-26.2449	0.381871	0.366373	0.0154979	F4	6.37	4.79046	0.000742423	0.11655	0.0329966
1068	Southern	Midwinter_II		Deciduous	Grass	Leaf	0.752035	42.8031	334.3	-26.2449	0.381871	0.366373	0.0154979	F5	1.32	0.992686	0.000153846	0.11655	0.00683759
1088	Southern	Late_Winter_WW		Deciduous	Grass	Leaf	1.24225	42.3541	27.29	-25.5285	0.381707	0.366373	0.0153341	F4	6.37	7.91313	0.00121341	0.190488	0.0539293
1089	Southern	Late_Winter_WW		Deciduous	Grass	Leaf	1.24225	42.3541	27.29	-25.5285	0.381707	0.366373	0.0153341	F5	1.32	1.63977	0.000251444	0.190488	0.0111753
1100					Cassiope							0.363407		nan
1101					Moslyng							0.364139		nan
