# Supplementary material
Source: Research Square preprint supplement (doi:10.21203/rs.3.rs-9353987/v1)
Supplement: Supplementary file 4 [file 39e578938237cfbe0c14c769.xlsx]

## Sheet: Sheet1
	Site	Winter_stage	Mesocosm_x	PFT	Species	Stem_leaf	N_percentage	d15N	C_Percentage	d13C	AT%_x	AT%_y	15NAPE%	Mesocosm_y	G_dryweight_total_mesocosm	Total_g_N_mesocosm	g_15N_APE_total_mesocosm	mg_15NAPE_per_g_dryweight_biomass	g_15N_APE_pr_m2
9	Eastern	Early_Winter		Evergreen	Empetrum	Leaf	1.09683	51.5705	661.582	-27.4388	0.385069	0.36287	0.0221985	K3	9.97	10.9354	0.00242749	0.24348	0.107889
10	Eastern	Early_Winter		Evergreen	Empetrum	Leaf	1.09683	51.5705	661.582	-27.4388	0.385069	0.36287	0.0221985	K5	9.37	10.2773	0.0022814	0.24348	0.101396
11	Eastern	Early_Winter		Evergreen	Empetrum	Leaf	1.09683	51.5705	661.582	-27.4388	0.385069	0.36287	0.0221985	K6	8.84	9.69598	0.00215236	0.24348	0.0956604
12	Eastern	Early_Winter		Evergreen	Empetrum	Leaf	1.09683	51.5705	661.582	-27.4388	0.385069	0.36287	0.0221985	K7	7.6	8.33591	0.00185044	0.24348	0.082242
37	Eastern	Midwinter_I		Evergreen	Empetrum	Leaf	1.2022	48.1306	205.073	-27.0189	0.383814	0.36287	0.0209437	K3	9.97	11.986	0.0025103	0.251785	0.111569
38	Eastern	Midwinter_I		Evergreen	Empetrum	Leaf	1.2022	48.1306	205.073	-27.0189	0.383814	0.36287	0.0209437	K5	9.37	11.2646	0.00235923	0.251785	0.104855
39	Eastern	Midwinter_I		Evergreen	Empetrum	Leaf	1.2022	48.1306	205.073	-27.0189	0.383814	0.36287	0.0209437	K6	8.84	10.6275	0.00222578	0.251785	0.0989236
40	Eastern	Midwinter_I		Evergreen	Empetrum	Leaf	1.2022	48.1306	205.073	-27.0189	0.383814	0.36287	0.0209437	K7	7.6	9.13673	0.00191357	0.251785	0.0850474
65	Eastern	Midwinter_II		Evergreen	Empetrum	Leaf	1.00275	47.5979	547.553	-26.7529	0.38362	0.36287	0.0207493	K3	9.97	9.99738	0.00207439	0.208063	0.0921951
66	Eastern	Midwinter_II		Evergreen	Empetrum	Leaf	1.00275	47.5979	547.553	-26.7529	0.38362	0.36287	0.0207493	K5	9.37	9.39573	0.00194955	0.208063	0.0866468
67	Eastern	Midwinter_II		Evergreen	Empetrum	Leaf	1.00275	47.5979	547.553	-26.7529	0.38362	0.36287	0.0207493	K6	8.84	8.86428	0.00183928	0.208063	0.0817457
68	Eastern	Midwinter_II		Evergreen	Empetrum	Leaf	1.00275	47.5979	547.553	-26.7529	0.38362	0.36287	0.0207493	K7	7.6	7.62087	0.00158128	0.208063	0.0702791
93	Eastern	Late_Winter_C		Evergreen	Empetrum	Leaf	1.06267	47.5558	718.164	-26.8465	0.383604	0.36287	0.020734	K3	9.97	10.5948	0.00219673	0.220334	0.0976324
94	Eastern	Late_Winter_C		Evergreen	Empetrum	Leaf	1.06267	47.5558	718.164	-26.8465	0.383604	0.36287	0.020734	K5	9.37	9.95722	0.00206453	0.220334	0.0917569
95	Eastern	Late_Winter_C		Evergreen	Empetrum	Leaf	1.06267	47.5558	718.164	-26.8465	0.383604	0.36287	0.020734	K6	8.84	9.394	0.00194775	0.220334	0.0865668
96	Eastern	Late_Winter_C		Evergreen	Empetrum	Leaf	1.06267	47.5558	718.164	-26.8465	0.383604	0.36287	0.020734	K7	7.6	8.07629	0.00167454	0.220334	0.0744239
121	Eastern	Late_Winter_WW		Evergreen	Empetrum	Leaf	0.828297	47.2148	630.128	-27.3565	0.38348	0.36287	0.0206096	K3	9.97	8.25812	0.00170197	0.170709	0.075643
122	Eastern	Late_Winter_WW		Evergreen	Empetrum	Leaf	0.828297	47.2148	630.128	-27.3565	0.38348	0.36287	0.0206096	K5	9.37	7.76114	0.00159954	0.170709	0.0710907
123	Eastern	Late_Winter_WW		Evergreen	Empetrum	Leaf	0.828297	47.2148	630.128	-27.3565	0.38348	0.36287	0.0206096	K6	8.84	7.32214	0.00150907	0.170709	0.0670696
124	Eastern	Late_Winter_WW		Evergreen	Empetrum	Leaf	0.828297	47.2148	630.128	-27.3565	0.38348	0.36287	0.0206096	K7	7.6	6.29505	0.00129739	0.170709	0.0576616
149	Eastern	Early_Winter		Evergreen	Empetrum	Stem	0.700556	51.1561	474.959	-27.2308	0.384918	0.36287	0.0220473	K3	9.84	6.89347	0.00151983	0.154454	0.0675479
150	Eastern	Early_Winter		Evergreen	Empetrum	Stem	0.700556	51.1561	474.959	-27.2308	0.384918	0.36287	0.0220473	K4	17.23	12.0706	0.00266124	0.154454	0.118277
151	Eastern	Early_Winter		Evergreen	Empetrum	Stem	0.700556	51.1561	474.959	-27.2308	0.384918	0.36287	0.0220473	K5	13.64	9.55558	0.00210675	0.154454	0.0936334
152	Eastern	Early_Winter		Evergreen	Empetrum	Stem	0.700556	51.1561	474.959	-27.2308	0.384918	0.36287	0.0220473	K6	8.72	6.10885	0.00134684	0.154454	0.0598595
153	Eastern	Early_Winter		Evergreen	Empetrum	Stem	0.700556	51.1561	474.959	-27.2308	0.384918	0.36287	0.0220473	K7	9.09	6.36805	0.00140399	0.154454	0.0623994
178	Eastern	Midwinter_I		Evergreen	Empetrum	Stem	0.889161	47.9667	1346.8	-27.6499	0.383754	0.36287	0.0208839	K3	9.84	8.74935	0.0018272	0.185691	0.081209
179	Eastern	Midwinter_I		Evergreen	Empetrum	Stem	0.889161	47.9667	1346.8	-27.6499	0.383754	0.36287	0.0208839	K4	17.23	15.3202	0.00319946	0.185691	0.142198
180	Eastern	Midwinter_I		Evergreen	Empetrum	Stem	0.889161	47.9667	1346.8	-27.6499	0.383754	0.36287	0.0208839	K5	13.64	12.1282	0.00253283	0.185691	0.11257
181	Eastern	Midwinter_I		Evergreen	Empetrum	Stem	0.889161	47.9667	1346.8	-27.6499	0.383754	0.36287	0.0208839	K6	8.72	7.75349	0.00161923	0.185691	0.0719657
182	Eastern	Midwinter_I		Evergreen	Empetrum	Stem	0.889161	47.9667	1346.8	-27.6499	0.383754	0.36287	0.0208839	K7	9.09	8.08248	0.00168793	0.185691	0.0750193
207	Eastern	Midwinter_II		Evergreen	Empetrum	Stem	0.817583	46.8125	972.072	-26.7809	0.383333	0.36287	0.0204628	K3	9.84	8.04501	0.00164624	0.167301	0.0731662
208	Eastern	Midwinter_II		Evergreen	Empetrum	Stem	0.817583	46.8125	972.072	-26.7809	0.383333	0.36287	0.0204628	K4	17.23	14.0869	0.00288259	0.167301	0.128115
209	Eastern	Midwinter_II		Evergreen	Empetrum	Stem	0.817583	46.8125	972.072	-26.7809	0.383333	0.36287	0.0204628	K5	13.64	11.1518	0.00228198	0.167301	0.101421
210	Eastern	Midwinter_II		Evergreen	Empetrum	Stem	0.817583	46.8125	972.072	-26.7809	0.383333	0.36287	0.0204628	K6	8.72	7.12932	0.00145886	0.167301	0.0648383
211	Eastern	Midwinter_II		Evergreen	Empetrum	Stem	0.817583	46.8125	972.072	-26.7809	0.383333	0.36287	0.0204628	K7	9.09	7.43183	0.00152076	0.167301	0.0675895
236	Eastern	Late_Winter_C		Evergreen	Empetrum	Stem	0.657991	48.7777	886.597	-26.9995	0.38405	0.36287	0.0211797	K3	9.84	6.47463	0.00137131	0.139361	0.0609471
237	Eastern	Late_Winter_C		Evergreen	Empetrum	Stem	0.657991	48.7777	886.597	-26.9995	0.38405	0.36287	0.0211797	K4	17.23	11.3372	0.00240118	0.139361	0.106719
238	Eastern	Late_Winter_C		Evergreen	Empetrum	Stem	0.657991	48.7777	886.597	-26.9995	0.38405	0.36287	0.0211797	K5	13.64	8.975	0.00190088	0.139361	0.0844835
239	Eastern	Late_Winter_C		Evergreen	Empetrum	Stem	0.657991	48.7777	886.597	-26.9995	0.38405	0.36287	0.0211797	K6	8.72	5.73768	0.00121522	0.139361	0.05401
240	Eastern	Late_Winter_C		Evergreen	Empetrum	Stem	0.657991	48.7777	886.597	-26.9995	0.38405	0.36287	0.0211797	K7	9.09	5.98114	0.00126679	0.139361	0.0563017
265	Eastern	Late_Winter_WW		Evergreen	Empetrum	Stem	0.663256	48.9587	3724.49	-27.4965	0.384116	0.36287	0.0212457	K3	9.84	6.52644	0.00138659	0.140914	0.0616262
266	Eastern	Late_Winter_WW		Evergreen	Empetrum	Stem	0.663256	48.9587	3724.49	-27.4965	0.384116	0.36287	0.0212457	K4	17.23	11.4279	0.00242794	0.140914	0.107909
267	Eastern	Late_Winter_WW		Evergreen	Empetrum	Stem	0.663256	48.9587	3724.49	-27.4965	0.384116	0.36287	0.0212457	K5	13.64	9.04681	0.00192206	0.140914	0.085425
268	Eastern	Late_Winter_WW		Evergreen	Empetrum	Stem	0.663256	48.9587	3724.49	-27.4965	0.384116	0.36287	0.0212457	K6	8.72	5.78359	0.00122877	0.140914	0.0546119
269	Eastern	Late_Winter_WW		Evergreen	Empetrum	Stem	0.663256	48.9587	3724.49	-27.4965	0.384116	0.36287	0.0212457	K7	9.09	6.02899	0.0012809	0.140914	0.0569291
298	Eastern	Early_Winter		Deciduous	Vaccinum	Leaf	0.776562	45.8068	117.8	-29.9778	0.382966	0.363926	0.0190398	K4	0.98	0.76103	0.000144899	0.147856	0.00643996
299	Eastern	Early_Winter		Deciduous	Vaccinum	Leaf	0.776562	45.8068	117.8	-29.9778	0.382966	0.363926	0.0190398	K6	1.86	1.4444	0.000275012	0.147856	0.0122228
300	Eastern	Early_Winter		Deciduous	Vaccinum	Leaf	0.776562	45.8068	117.8	-29.9778	0.382966	0.363926	0.0190398	K7	0.82	0.636781	0.000121242	0.147856	0.00538854
301	Eastern	Early_Winter		Deciduous	Vaccinum	Leaf	0.776562	45.8068	117.8	-29.9778	0.382966	0.363926	0.0190398	K8	0.49	0.380515	7.24495e-05	0.147856	0.00321998
321	Eastern	Midwinter_I		Deciduous	Vaccinum	Leaf	1.35147	43.4964	29.556	-28.6869	0.382123	0.363926	0.018197	K4	0.98	1.32444	0.000241008	0.245927	0.0107115
322	Eastern	Midwinter_I		Deciduous	Vaccinum	Leaf	1.35147	43.4964	29.556	-28.6869	0.382123	0.363926	0.018197	K6	1.86	2.51373	0.000457423	0.245927	0.0203299
323	Eastern	Midwinter_I		Deciduous	Vaccinum	Leaf	1.35147	43.4964	29.556	-28.6869	0.382123	0.363926	0.018197	K7	0.82	1.1082	0.00020166	0.245927	0.00896266
324	Eastern	Midwinter_I		Deciduous	Vaccinum	Leaf	1.35147	43.4964	29.556	-28.6869	0.382123	0.363926	0.018197	K8	0.49	0.662218	0.000120504	0.245927	0.00535573
344	Eastern	Midwinter_II		Deciduous	Vaccinum	Leaf	1.38117	46.3406	44.24	-28.4569	0.383161	0.363926	0.0192346	K4	0.98	1.35354	0.000260348	0.265661	0.011571
345	Eastern	Midwinter_II		Deciduous	Vaccinum	Leaf	1.38117	46.3406	44.24	-28.4569	0.383161	0.363926	0.0192346	K6	1.86	2.56897	0.00049413	0.265661	0.0219613
346	Eastern	Midwinter_II		Deciduous	Vaccinum	Leaf	1.38117	46.3406	44.24	-28.4569	0.383161	0.363926	0.0192346	K7	0.82	1.13256	0.000217842	0.265661	0.00968187
347	Eastern	Midwinter_II		Deciduous	Vaccinum	Leaf	1.38117	46.3406	44.24	-28.4569	0.383161	0.363926	0.0192346	K8	0.49	0.676771	0.000130174	0.265661	0.00578551
367	Eastern	Late_Winter_C		Deciduous	Vaccinum	Leaf	1.46215	43.3094	45.432	-26.7095	0.382055	0.363926	0.0181288	K4	0.98	1.43291	0.00025977	0.265071	0.0115453
368	Eastern	Late_Winter_C		Deciduous	Vaccinum	Leaf	1.46215	43.3094	45.432	-26.7095	0.382055	0.363926	0.0181288	K6	1.86	2.71961	0.000493032	0.265071	0.0219125
369	Eastern	Late_Winter_C		Deciduous	Vaccinum	Leaf	1.46215	43.3094	45.432	-26.7095	0.382055	0.363926	0.0181288	K7	0.82	1.19897	0.000217358	0.265071	0.00966037
370	Eastern	Late_Winter_C		Deciduous	Vaccinum	Leaf	1.46215	43.3094	45.432	-26.7095	0.382055	0.363926	0.0181288	K8	0.49	0.716455	0.000129885	0.265071	0.00577266
390	Eastern	Late_Winter_WW		Deciduous	Vaccinum	Leaf	0.545585	40.088	337.701	-29.6715	0.38088	0.363926	0.0169536	K4	0.98	0.534673	9.06466e-05	0.0924966	0.00402874
391	Eastern	Late_Winter_WW		Deciduous	Vaccinum	Leaf	0.545585	40.088	337.701	-29.6715	0.38088	0.363926	0.0169536	K6	1.86	1.01479	0.000172044	0.0924966	0.00764638
392	Eastern	Late_Winter_WW		Deciduous	Vaccinum	Leaf	0.545585	40.088	337.701	-29.6715	0.38088	0.363926	0.0169536	K7	0.82	0.44738	7.58472e-05	0.0924966	0.00337099
393	Eastern	Late_Winter_WW		Deciduous	Vaccinum	Leaf	0.545585	40.088	337.701	-29.6715	0.38088	0.363926	0.0169536	K8	0.49	0.267337	4.53233e-05	0.0924966	0.00201437
413	Eastern	Early_Winter		Deciduous	Vaccinum	Stem	1.09016	50.1361	16.159	-29.7968	0.384546	0.363926	0.0206191	K4	4.19	4.56779	0.000941837	0.224782	0.0418594
414	Eastern	Early_Winter		Deciduous	Vaccinum	Stem	1.09016	50.1361	16.159	-29.7968	0.384546	0.363926	0.0206191	K6	12.65	13.7906	0.00284349	0.224782	0.126378
415	Eastern	Early_Winter		Deciduous	Vaccinum	Stem	1.09016	50.1361	16.159	-29.7968	0.384546	0.363926	0.0206191	K7	3.53	3.84828	0.000793481	0.224782	0.0352658
416	Eastern	Early_Winter		Deciduous	Vaccinum	Stem	1.09016	50.1361	16.159	-29.7968	0.384546	0.363926	0.0206191	K8	1.97	2.14762	0.000442821	0.224782	0.0196809
436	Eastern	Midwinter_I		Deciduous	Vaccinum	Stem	0.934553	47.5228	23.769	-28.9109	0.383592	0.363926	0.0196658	K4	4.19	3.91578	0.00077007	0.183788	0.0342253
437	Eastern	Midwinter_I		Deciduous	Vaccinum	Stem	0.934553	47.5228	23.769	-28.9109	0.383592	0.363926	0.0196658	K6	12.65	11.8221	0.00232491	0.183788	0.103329
438	Eastern	Midwinter_I		Deciduous	Vaccinum	Stem	0.934553	47.5228	23.769	-28.9109	0.383592	0.363926	0.0196658	K7	3.53	3.29897	0.00064877	0.183788	0.0288342
439	Eastern	Midwinter_I		Deciduous	Vaccinum	Stem	0.934553	47.5228	23.769	-28.9109	0.383592	0.363926	0.0196658	K8	1.97	1.84107	0.000362062	0.183788	0.0160916
459	Eastern	Midwinter_II		Deciduous	Vaccinum	Stem	1.1924	50.9082	57.032	-28.9689	0.384827	0.363926	0.0209008	K4	4.19	4.99614	0.00104423	0.24922	0.0464103
460	Eastern	Midwinter_II		Deciduous	Vaccinum	Stem	1.1924	50.9082	57.032	-28.9689	0.384827	0.363926	0.0209008	K6	12.65	15.0838	0.00315263	0.24922	0.140117
461	Eastern	Midwinter_II		Deciduous	Vaccinum	Stem	1.1924	50.9082	57.032	-28.9689	0.384827	0.363926	0.0209008	K7	3.53	4.20916	0.000879747	0.24922	0.0390999
462	Eastern	Midwinter_II		Deciduous	Vaccinum	Stem	1.1924	50.9082	57.032	-28.9689	0.384827	0.363926	0.0209008	K8	1.97	2.34902	0.000490964	0.24922	0.0218206
482	Eastern	Late_Winter_C		Deciduous	Vaccinum	Stem	1.00044	46.6309	423.775	-25.8065	0.383267	0.363926	0.0193405	K4	4.19	4.19184	0.000810721	0.19349	0.036032
483	Eastern	Late_Winter_C		Deciduous	Vaccinum	Stem	1.00044	46.6309	423.775	-25.8065	0.383267	0.363926	0.0193405	K6	12.65	12.6556	0.00244764	0.19349	0.108784
484	Eastern	Late_Winter_C		Deciduous	Vaccinum	Stem	1.00044	46.6309	423.775	-25.8065	0.383267	0.363926	0.0193405	K7	3.53	3.53155	0.000683018	0.19349	0.0303564
485	Eastern	Late_Winter_C		Deciduous	Vaccinum	Stem	1.00044	46.6309	423.775	-25.8065	0.383267	0.363926	0.0193405	K8	1.97	1.97087	0.000381174	0.19349	0.0169411
505	Eastern	Late_Winter_WW		Deciduous	Vaccinum	Stem	1.11286	50.9269	178.732	-29.0445	0.384834	0.363926	0.0209076	K4	4.19	4.66289	0.000974897	0.232672	0.0433288
506	Eastern	Late_Winter_WW		Deciduous	Vaccinum	Stem	1.11286	50.9269	178.732	-29.0445	0.384834	0.363926	0.0209076	K6	12.65	14.0777	0.00294331	0.232672	0.130814
507	Eastern	Late_Winter_WW		Deciduous	Vaccinum	Stem	1.11286	50.9269	178.732	-29.0445	0.384834	0.363926	0.0209076	K7	3.53	3.9284	0.000821334	0.232672	0.0365037
508	Eastern	Late_Winter_WW		Deciduous	Vaccinum	Stem	1.11286	50.9269	178.732	-29.0445	0.384834	0.363926	0.0209076	K8	1.97	2.19234	0.000458365	0.232672	0.0203718
524	Eastern	Early_Winter		Deciduous	Salix	Leaf	2.38166	47.1638	6.494	-27.3548	0.383461	0.365374	0.0180876	K1	0.58	1.38136	0.000249856	0.430786	0.0111047
525	Eastern	Early_Winter		Deciduous	Salix	Leaf	2.38166	47.1638	6.494	-27.3548	0.383461	0.365374	0.0180876	K2	0.02	0.0476332	8.61572e-06	0.430786	0.000382921
526	Eastern	Early_Winter		Deciduous	Salix	Leaf	2.38166	47.1638	6.494	-27.3548	0.383461	0.365374	0.0180876	K5	0.01	0.0238166	4.30786e-06	0.430786	0.000191461
527	Eastern	Early_Winter		Deciduous	Salix	Leaf	2.38166	47.1638	6.494	-27.3548	0.383461	0.365374	0.0180876	K8	0.81	1.92915	0.000348937	0.430786	0.0155083
542	Eastern	Midwinter_I		Deciduous	Salix	Leaf	2.14963	44.2461	31.218	-26.9999	0.382397	0.365374	0.0170233	K1	0.58	1.24679	0.000212244	0.365938	0.00943308
543	Eastern	Midwinter_I		Deciduous	Salix	Leaf	2.14963	44.2461	31.218	-26.9999	0.382397	0.365374	0.0170233	K2	0.02	0.0429927	7.31877e-06	0.365938	0.000325279
544	Eastern	Midwinter_I		Deciduous	Salix	Leaf	2.14963	44.2461	31.218	-26.9999	0.382397	0.365374	0.0170233	K5	0.01	0.0214963	3.65938e-06	0.365938	0.000162639
545	Eastern	Midwinter_I		Deciduous	Salix	Leaf	2.14963	44.2461	31.218	-26.9999	0.382397	0.365374	0.0170233	K8	0.81	1.7412	0.00029641	0.365938	0.0131738
560	Eastern	Midwinter_II		Deciduous	Salix	Leaf	2.10234	38.7945	9.81	-26.6439	0.380408	0.365374	0.0150345	K1	0.58	1.21936	0.000183325	0.316077	0.00814776
561	Eastern	Midwinter_II		Deciduous	Salix	Leaf	2.10234	38.7945	9.81	-26.6439	0.380408	0.365374	0.0150345	K2	0.02	0.0420468	6.32154e-06	0.316077	0.000280957
562	Eastern	Midwinter_II		Deciduous	Salix	Leaf	2.10234	38.7945	9.81	-26.6439	0.380408	0.365374	0.0150345	K5	0.01	0.0210234	3.16077e-06	0.316077	0.000140479
563	Eastern	Midwinter_II		Deciduous	Salix	Leaf	2.10234	38.7945	9.81	-26.6439	0.380408	0.365374	0.0150345	K8	0.81	1.70289	0.000256022	0.316077	0.0113788
578	Eastern	Late_Winter_C		Deciduous	Salix	Leaf	2.74668	50.3321	42.366	-26.3585	0.384617	0.365374	0.0192434	K1	0.58	1.59308	0.000306562	0.528555	0.013625
579	Eastern	Late_Winter_C		Deciduous	Salix	Leaf	2.74668	50.3321	42.366	-26.3585	0.384617	0.365374	0.0192434	K2	0.02	0.0549337	1.05711e-05	0.528555	0.000469826
580	Eastern	Late_Winter_C		Deciduous	Salix	Leaf	2.74668	50.3321	42.366	-26.3585	0.384617	0.365374	0.0192434	K5	0.01	0.0274668	5.28555e-06	0.528555	0.000234913
581	Eastern	Late_Winter_C		Deciduous	Salix	Leaf	2.74668	50.3321	42.366	-26.3585	0.384617	0.365374	0.0192434	K8	0.81	2.22481	0.000428129	0.528555	0.019028
596	Eastern	Late_Winter_WW		Deciduous	Salix	Leaf	2.11116	43.2637	135.089	-26.7855	0.382039	0.365374	0.0166649	K1	0.58	1.22448	0.000204058	0.351824	0.00906924
597	Eastern	Late_Winter_WW		Deciduous	Salix	Leaf	2.11116	43.2637	135.089	-26.7855	0.382039	0.365374	0.0166649	K2	0.02	0.0422233	7.03648e-06	0.351824	0.000312732
598	Eastern	Late_Winter_WW		Deciduous	Salix	Leaf	2.11116	43.2637	135.089	-26.7855	0.382039	0.365374	0.0166649	K5	0.01	0.0211116	3.51824e-06	0.351824	0.000156366
599	Eastern	Late_Winter_WW		Deciduous	Salix	Leaf	2.11116	43.2637	135.089	-26.7855	0.382039	0.365374	0.0166649	K8	0.81	1.71004	0.000284977	0.351824	0.0126657
614	Eastern	Early_Winter		Deciduous	Salix	Stem	0.945665	52.3915	326.9	-29.0938	0.385368	0.365374	0.0199946	K1	3.77	3.56516	0.000712838	0.189082	0.0316817
615	Eastern	Early_Winter		Deciduous	Salix	Stem	0.945665	52.3915	326.9	-29.0938	0.385368	0.365374	0.0199946	K2	1.81	1.71165	0.000342238	0.189082	0.0152106
616	Eastern	Early_Winter		Deciduous	Salix	Stem	0.945665	52.3915	326.9	-29.0938	0.385368	0.365374	0.0199946	K3	2.03	1.9197	0.000383836	0.189082	0.0170594
617	Eastern	Early_Winter		Deciduous	Salix	Stem	0.945665	52.3915	326.9	-29.0938	0.385368	0.365374	0.0199946	K5	0.49	0.463376	9.26501e-05	0.189082	0.00411778
618	Eastern	Early_Winter		Deciduous	Salix	Stem	0.945665	52.3915	326.9	-29.0938	0.385368	0.365374	0.0199946	K8	7.42	7.01683	0.00140299	0.189082	0.062355
634	Eastern	Midwinter_I		Deciduous	Salix	Stem	3.0806	46.5984	16.246	-26.9779	0.383255	0.365374	0.0178814	K1	3.77	11.6139	0.00207672	0.550853	0.0922985
635	Eastern	Midwinter_I		Deciduous	Salix	Stem	3.0806	46.5984	16.246	-26.9779	0.383255	0.365374	0.0178814	K2	1.81	5.57588	0.000997044	0.550853	0.0443131
636	Eastern	Midwinter_I		Deciduous	Salix	Stem	3.0806	46.5984	16.246	-26.9779	0.383255	0.365374	0.0178814	K3	2.03	6.25361	0.00111823	0.550853	0.0496992
637	Eastern	Midwinter_I		Deciduous	Salix	Stem	3.0806	46.5984	16.246	-26.9779	0.383255	0.365374	0.0178814	K5	0.49	1.50949	0.000269918	0.550853	0.0119964
638	Eastern	Midwinter_I		Deciduous	Salix	Stem	3.0806	46.5984	16.246	-26.9779	0.383255	0.365374	0.0178814	K8	7.42	22.858	0.00408733	0.550853	0.181659
654	Eastern	Midwinter_II		Deciduous	Salix	Stem	1.30697	46.2987	26.232	-28.6469	0.383146	0.365374	0.0177721	K1	3.77	4.92727	0.000875678	0.232275	0.038919
655	Eastern	Midwinter_II		Deciduous	Salix	Stem	1.30697	46.2987	26.232	-28.6469	0.383146	0.365374	0.0177721	K2	1.81	2.36561	0.000420418	0.232275	0.0186853
656	Eastern	Midwinter_II		Deciduous	Salix	Stem	1.30697	46.2987	26.232	-28.6469	0.383146	0.365374	0.0177721	K3	2.03	2.65314	0.000471519	0.232275	0.0209564
657	Eastern	Midwinter_II		Deciduous	Salix	Stem	1.30697	46.2987	26.232	-28.6469	0.383146	0.365374	0.0177721	K5	0.49	0.640414	0.000113815	0.232275	0.00505844
658	Eastern	Midwinter_II		Deciduous	Salix	Stem	1.30697	46.2987	26.232	-28.6469	0.383146	0.365374	0.0177721	K8	7.42	9.6977	0.00172348	0.232275	0.0765992
674	Eastern	Late_Winter_C		Deciduous	Salix	Stem	1.37364	42.8388	6.51	-26.4325	0.381884	0.365374	0.0165099	K1	3.77	5.17861	0.000854983	0.226786	0.0379993
675	Eastern	Late_Winter_C		Deciduous	Salix	Stem	1.37364	42.8388	6.51	-26.4325	0.381884	0.365374	0.0165099	K2	1.81	2.48628	0.000410483	0.226786	0.0182437
676	Eastern	Late_Winter_C		Deciduous	Salix	Stem	1.37364	42.8388	6.51	-26.4325	0.381884	0.365374	0.0165099	K3	2.03	2.78848	0.000460376	0.226786	0.0204611
677	Eastern	Late_Winter_C		Deciduous	Salix	Stem	1.37364	42.8388	6.51	-26.4325	0.381884	0.365374	0.0165099	K5	0.49	0.673082	0.000111125	0.226786	0.0049389
678	Eastern	Late_Winter_C		Deciduous	Salix	Stem	1.37364	42.8388	6.51	-26.4325	0.381884	0.365374	0.0165099	K8	7.42	10.1924	0.00168275	0.226786	0.074789
694	Eastern	Late_Winter_WW		Deciduous	Salix	Stem	2.26479	45.6339	24.727	-26.5335	0.382903	0.365374	0.0175295	K1	3.77	8.53827	0.00149672	0.397008	0.0665209
695	Eastern	Late_Winter_WW		Deciduous	Salix	Stem	2.26479	45.6339	24.727	-26.5335	0.382903	0.365374	0.0175295	K2	1.81	4.09927	0.000718584	0.397008	0.0319371
696	Eastern	Late_Winter_WW		Deciduous	Salix	Stem	2.26479	45.6339	24.727	-26.5335	0.382903	0.365374	0.0175295	K3	2.03	4.59753	0.000805926	0.397008	0.0358189
697	Eastern	Late_Winter_WW		Deciduous	Salix	Stem	2.26479	45.6339	24.727	-26.5335	0.382903	0.365374	0.0175295	K5	0.49	1.10975	0.000194534	0.397008	0.00864595
698	Eastern	Late_Winter_WW		Deciduous	Salix	Stem	2.26479	45.6339	24.727	-26.5335	0.382903	0.365374	0.0175295	K8	7.42	16.8048	0.0029458	0.397008	0.130924
711	Eastern	Early_Winter		Deciduous	Grass	Leaf	0.472193	42.3256	133.485	-28.4178	0.381696	0.366373	0.0153237	K1	3.82	1.80378	0.000276406	0.0723577	0.0122847
712	Eastern	Early_Winter		Deciduous	Grass	Leaf	0.472193	42.3256	133.485	-28.4178	0.381696	0.366373	0.0153237	K2	1.84	0.868836	0.000133138	0.0723577	0.00591725
713	Eastern	Early_Winter		Deciduous	Grass	Leaf	0.472193	42.3256	133.485	-28.4178	0.381696	0.366373	0.0153237	K3	0.075	0.0354145	5.42683e-06	0.0723577	0.000241192
714	Eastern	Early_Winter		Deciduous	Grass	Leaf	0.472193	42.3256	133.485	-28.4178	0.381696	0.366373	0.0153237	K5	0.056	0.0264428	4.05203e-06	0.0723577	0.00018009
715	Eastern	Early_Winter		Deciduous	Grass	Leaf	0.472193	42.3256	133.485	-28.4178	0.381696	0.366373	0.0153237	K7	0.06	0.0283316	4.34146e-06	0.0723577	0.000192954
716	Eastern	Early_Winter		Deciduous	Grass	Leaf	0.472193	42.3256	133.485	-28.4178	0.381696	0.366373	0.0153237	K8	0.2	0.0944387	1.44715e-05	0.0723577	0.000643179
732	Eastern	Midwinter_I		Deciduous	Grass	Leaf	0.977444	41.4467	29785.7	-28.0749	0.381376	0.366373	0.0150031	K1	3.82	3.73384	0.000560191	0.146647	0.0248974
733	Eastern	Midwinter_I		Deciduous	Grass	Leaf	0.977444	41.4467	29785.7	-28.0749	0.381376	0.366373	0.0150031	K2	1.84	1.7985	0.00026983	0.146647	0.0119925
734	Eastern	Midwinter_I		Deciduous	Grass	Leaf	0.977444	41.4467	29785.7	-28.0749	0.381376	0.366373	0.0150031	K3	0.075	0.0733083	1.09985e-05	0.146647	0.000488823
735	Eastern	Midwinter_I		Deciduous	Grass	Leaf	0.977444	41.4467	29785.7	-28.0749	0.381376	0.366373	0.0150031	K5	0.056	0.0547369	8.21223e-06	0.146647	0.000364988
736	Eastern	Midwinter_I		Deciduous	Grass	Leaf	0.977444	41.4467	29785.7	-28.0749	0.381376	0.366373	0.0150031	K7	0.06	0.0586467	8.79881e-06	0.146647	0.000391058
737	Eastern	Midwinter_I		Deciduous	Grass	Leaf	0.977444	41.4467	29785.7	-28.0749	0.381376	0.366373	0.0150031	K8	0.2	0.195489	2.93294e-05	0.146647	0.00130353
753	Eastern	Midwinter_II		Deciduous	Grass	Leaf	0.81434	41.9148	205.641	-28.2229	0.381547	0.366373	0.0151739	K1	3.82	3.11078	0.000472026	0.123567	0.0209789
754	Eastern	Midwinter_II		Deciduous	Grass	Leaf	0.81434	41.9148	205.641	-28.2229	0.381547	0.366373	0.0151739	K2	1.84	1.49839	0.000227363	0.123567	0.010105
755	Eastern	Midwinter_II		Deciduous	Grass	Leaf	0.81434	41.9148	205.641	-28.2229	0.381547	0.366373	0.0151739	K3	0.075	0.0610755	9.26753e-06	0.123567	0.00041189
756	Eastern	Midwinter_II		Deciduous	Grass	Leaf	0.81434	41.9148	205.641	-28.2229	0.381547	0.366373	0.0151739	K5	0.056	0.045603	6.91975e-06	0.123567	0.000307545
757	Eastern	Midwinter_II		Deciduous	Grass	Leaf	0.81434	41.9148	205.641	-28.2229	0.381547	0.366373	0.0151739	K7	0.06	0.0488604	7.41402e-06	0.123567	0.000329512
758	Eastern	Midwinter_II		Deciduous	Grass	Leaf	0.81434	41.9148	205.641	-28.2229	0.381547	0.366373	0.0151739	K8	0.2	0.162868	2.47134e-05	0.123567	0.00109837
774	Eastern	Late_Winter_C		Deciduous	Grass	Leaf	1.43338	41.8592	3111.86	-28.8325	0.381526	0.366373	0.0151536	K1	3.82	5.4755	0.000829734	0.217208	0.0368771
775	Eastern	Late_Winter_C		Deciduous	Grass	Leaf	1.43338	41.8592	3111.86	-28.8325	0.381526	0.366373	0.0151536	K2	1.84	2.63741	0.000399662	0.217208	0.0177628
776	Eastern	Late_Winter_C		Deciduous	Grass	Leaf	1.43338	41.8592	3111.86	-28.8325	0.381526	0.366373	0.0151536	K3	0.075	0.107503	1.62906e-05	0.217208	0.000724026
777	Eastern	Late_Winter_C		Deciduous	Grass	Leaf	1.43338	41.8592	3111.86	-28.8325	0.381526	0.366373	0.0151536	K5	0.056	0.0802691	1.21636e-05	0.217208	0.000540606
778	Eastern	Late_Winter_C		Deciduous	Grass	Leaf	1.43338	41.8592	3111.86	-28.8325	0.381526	0.366373	0.0151536	K7	0.06	0.0860026	1.30325e-05	0.217208	0.000579221
779	Eastern	Late_Winter_C		Deciduous	Grass	Leaf	1.43338	41.8592	3111.86	-28.8325	0.381526	0.366373	0.0151536	K8	0.2	0.286675	4.34416e-05	0.217208	0.00193074
795	Eastern	Late_Winter_WW		Deciduous	Grass	Leaf	1.65238	43.5842	219.61	-27.7995	0.382156	0.366373	0.0157829	K1	3.82	6.31208	0.000996228	0.260793	0.0442768
796	Eastern	Late_Winter_WW		Deciduous	Grass	Leaf	1.65238	43.5842	219.61	-27.7995	0.382156	0.366373	0.0157829	K2	1.84	3.04037	0.000479858	0.260793	0.021327
797	Eastern	Late_Winter_WW		Deciduous	Grass	Leaf	1.65238	43.5842	219.61	-27.7995	0.382156	0.366373	0.0157829	K3	0.075	0.123928	1.95594e-05	0.260793	0.000869309
798	Eastern	Late_Winter_WW		Deciduous	Grass	Leaf	1.65238	43.5842	219.61	-27.7995	0.382156	0.366373	0.0157829	K5	0.056	0.0925331	1.46044e-05	0.260793	0.000649084
799	Eastern	Late_Winter_WW		Deciduous	Grass	Leaf	1.65238	43.5842	219.61	-27.7995	0.382156	0.366373	0.0157829	K7	0.06	0.0991426	1.56476e-05	0.260793	0.000695447
800	Eastern	Late_Winter_WW		Deciduous	Grass	Leaf	1.65238	43.5842	219.61	-27.7995	0.382156	0.366373	0.0157829	K8	0.2	0.330475	5.21585e-05	0.260793	0.00231816
823	Eastern	Early_Winter		Moss	Moss	Leaf	0.836771	25.8652	44.398	-25.8578	0.375691	0.365431	0.0102598	K1	5.9	4.93695	0.000506524	0.0858514	0.0225122
824	Eastern	Early_Winter		Moss	Moss	Leaf	0.836771	25.8652	44.398	-25.8578	0.375691	0.365431	0.0102598	K2	3.26	2.72787	0.000279876	0.0858514	0.0124389
825	Eastern	Early_Winter		Moss	Moss	Leaf	0.836771	25.8652	44.398	-25.8578	0.375691	0.365431	0.0102598	K4	8.76	7.33012	0.000752059	0.0858514	0.0334248
827	Eastern	Early_Winter		Moss	Moss	Leaf	0.836771	25.8652	44.398	-25.8578	0.375691	0.365431	0.0102598	K8	1.22	1.02086	0.000104739	0.0858514	0.00465506
849	Eastern	Midwinter_I		Moss	Moss	Leaf	0.715823	22.6995	34.31	-25.9429	0.374536	0.365431	0.00910483	K1	5.9	4.22336	0.00038453	0.0651745	0.0170902
850	Eastern	Midwinter_I		Moss	Moss	Leaf	0.715823	22.6995	34.31	-25.9429	0.374536	0.365431	0.00910483	K2	3.26	2.33358	0.000212469	0.0651745	0.00944306
851	Eastern	Midwinter_I		Moss	Moss	Leaf	0.715823	22.6995	34.31	-25.9429	0.374536	0.365431	0.00910483	K4	8.76	6.27061	0.000570929	0.0651745	0.0253746
853	Eastern	Midwinter_I		Moss	Moss	Leaf	0.715823	22.6995	34.31	-25.9429	0.374536	0.365431	0.00910483	K8	1.22	0.873304	7.95129e-05	0.0651745	0.00353391
875	Eastern	Midwinter_II		Moss	Moss	Leaf	1.02806	37.5139	105.613	-26.3179	0.379941	0.365431	0.0145096	K1	5.9	6.06557	0.000880089	0.149168	0.0391151
876	Eastern	Midwinter_II		Moss	Moss	Leaf	1.02806	37.5139	105.613	-26.3179	0.379941	0.365431	0.0145096	K2	3.26	3.35148	0.000486286	0.149168	0.0216127
877	Eastern	Midwinter_II		Moss	Moss	Leaf	1.02806	37.5139	105.613	-26.3179	0.379941	0.365431	0.0145096	K4	8.76	9.00583	0.00130671	0.149168	0.0580759
879	Eastern	Midwinter_II		Moss	Moss	Leaf	1.02806	37.5139	105.613	-26.3179	0.379941	0.365431	0.0145096	K8	1.22	1.25424	0.000181984	0.149168	0.0080882
901	Eastern	Late_Winter_C		Moss	Moss	Leaf	0.826976	29.8416	81.202	-26.0435	0.377142	0.365431	0.0117106	K1	5.9	4.87916	0.000571378	0.0968437	0.0253946
902	Eastern	Late_Winter_C		Moss	Moss	Leaf	0.826976	29.8416	81.202	-26.0435	0.377142	0.365431	0.0117106	K2	3.26	2.69594	0.00031571	0.0968437	0.0140316
903	Eastern	Late_Winter_C		Moss	Moss	Leaf	0.826976	29.8416	81.202	-26.0435	0.377142	0.365431	0.0117106	K4	8.76	7.24431	0.000848351	0.0968437	0.0377045
905	Eastern	Late_Winter_C		Moss	Moss	Leaf	0.826976	29.8416	81.202	-26.0435	0.377142	0.365431	0.0117106	K8	1.22	1.00891	0.000118149	0.0968437	0.00525108
927	Eastern	Late_Winter_WW		Moss	Moss	Leaf	0.843436	34.3115	26.166	-25.1265	0.378773	0.365431	0.0133413	K1	5.9	4.97627	0.0006639	0.112525	0.0295067
928	Eastern	Late_Winter_WW		Moss	Moss	Leaf	0.843436	34.3115	26.166	-25.1265	0.378773	0.365431	0.0133413	K2	3.26	2.7496	0.000366833	0.112525	0.0163037
929	Eastern	Late_Winter_WW		Moss	Moss	Leaf	0.843436	34.3115	26.166	-25.1265	0.378773	0.365431	0.0133413	K4	8.76	7.3885	0.000985723	0.112525	0.0438099
931	Eastern	Late_Winter_WW		Moss	Moss	Leaf	0.843436	34.3115	26.166	-25.1265	0.378773	0.365431	0.0133413	K8	1.22	1.02899	0.000137281	0.112525	0.00610138
948	Eastern	Early_Winter		Moss	Lichen	Leaf	0.841628	20.1775	213.249	-28.3508	0.373616	0.365577	0.00803877	K4	0.05	0.0420814	3.38283e-06	0.0676565	0.000150348
949	Eastern	Early_Winter		Moss	Lichen	Leaf	0.841628	20.1775	213.249	-28.3508	0.373616	0.365577	0.00803877	K8	0.09	0.0757465	6.08909e-06	0.0676565	0.000270626
957	Eastern	Late_Winter_WW		Deciduous	Salix herbacea	Leaf	1.89515	39.6547	6.736	-30.5455	0.380722	0.364139	0.016583	K2	0.05	0.0947575	1.57136e-05	0.314272	0.000698382
958	Eastern	Late_Winter_WW		Deciduous	Salix herbacea	Leaf	1.89515	39.6547	6.736	-30.5455	0.380722	0.364139	0.016583	K7	0.034	0.0644351	1.06853e-05	0.314272	0.0004749
962					Betula							0.364901		nan
963					Cassiope							0.363407		nan
964					Dryas							0.365246		nan
965					Moslyng							0.364139		nan
966					Pileurt							0.3653		nan
999					Pileurt	Leaf								K5	0.09
1026					Dryas	Leaf								K1	0.2
1027					Dryas	Leaf								K2	0.06
1028					Dryas	Leaf								K4	0.16
1029					Dryas	Leaf								K8	0.36
1031					Salix herbacea	Stem								K7	0.096
