# Supplementary material
Source: Research Square preprint supplement (doi:10.21203/rs.3.rs-9353987/v1)
Supplement: Supplementary file 5 [file 39fd10620361a204de1bedce.xlsx]

## Sheet: Sheet1
Site	Mesocosm	Winter_stage	Fum_x	GWC sample fresh soil_x	mgN pr g DW soil_x	mgC in soil extr_x	microg N pr g DW soil (IRMS)_x	microg C pr g DW soil (IRMS)_x	C/N in extract or peach_x	δ15Nkorr_x	Nat abun 15N_x	atom% (15N)_x	APE% 15N_x	gDW_soil_extracted_x	15N in N_x	δ13Ckorr_x	Total_dryweight_g_soil	microgram_15N_pr_g_Dryweight_soil_x	ID_y	Fum_y	GWC sample fresh soil_y	mgN pr g DW soil_y	mgC in soil extr_y	microg N pr g DW soil (IRMS)_y	microg C pr g DW soil (IRMS)_y	C/N in extract or peach_y	δ15Nkorr_y	Nat abun 15N_y	atom% (15N)_y	APE% 15N_y	gDW_soil_extracted_y	15N in N_y	δ13Ckorr_y	microgram_15N_pr_g_Dryweight_soil_y	Microbial_15N_microgram/g Dryweigth soil	microgram Microbial 15N exess pr m2 to 10 cm	Recovery_if_scaled_to_m2_to_10cm_depth
Southern	F1	Early_Winter	Fum	44.152	0.0370798	0.575572	37.0798	575.572	15.5225	17842.7	0.3669	6.47787	6.11097	5.5848	61109.7	-24.4726	2963.48	2.26593	F1	Non-fum	44.152	0.0102161	0.20985	10.2161	209.85	20.5411	665.186	0.3668	0.608398	0.241498	5.59596	2414.98	-23.0648	0.0246717	2.24126	121384	28.9009
Southern	F1	Late_Winter_C	Fum	25.2459	0.0118187	0.232513	11.8187	232.513	19.6734	22351.5	0.3669	7.90542	7.53852	7.54269	75385.2	-26.7152	1487.24	0.890952	F1	Non-fum	25.2459	0.0037974	0.075664	3.7974	75.664	19.9252	707.998	0.3668	0.623943	0.257043	7.46793	2570.43		0.00976094	0.881192	47724.3	11.3629
Southern	F1	Midwinter_I	Fum	52	0.12072	2.68963	120.72	2689.63	22.2799	10573.4	0.3669	4.08078	3.71388	4.8048	37138.8	-26.1094	1315.51	4.48338	F1	Non-fum	52	0.028853	0.614898	28.853	614.898	21.3114	3779.1	0.3668	1.72647	1.35957	4.7904	13595.7	-24.6387	0.392275	4.09111	221569	52.7546
Southern	F1	Midwinter_II	Fum	46.9102	0.0277236	0.412673	27.7236	412.673	14.8853	10647.7	0.3669	4.10589	3.73899	5.31429	37389.9	-25.1629	1389.12	1.03658	F1	Non-fum	46.9102	0.00121275	0.0230396	1.21275	23.0396	18.9979	1849.23	0.3668	1.03652	0.66962	5.33022	6696.2	-16.3478	0.0081208	1.02846	55700.3	13.262
Southern	F2	Early_Winter	Fum	38.1995	0.0569501	1.62832	56.9501	1628.32	28.5921	26680.4	0.3669	9.23556	8.86866	6.17387	88686.6	-28.5749	959.511	5.05071	F2	Non-fum	38.1995	0.0113688	0.254876	11.3688	254.876	22.4189	1922.03	0.3668	1.06272	0.695823	6.19241	6958.23	-23.2314	0.0791068	4.97161	196984	46.9009
Southern	F2	Late_Winter_C	Fum	56.4557	0.0104485	0.24132	10.4485	241.32	23.0962	26003.8	0.3669	9.03019	8.66329	4.40668	86632.9	-26.4073	893.799	0.90518	F2	Non-fum	56.4557	0.00437918	0.150502	4.37918	150.502	34.3677	3737.63	0.3668	1.71174	1.34484	4.35443	13448.4		0.0588931	0.846287	33531.4	7.98366
Southern	F2	Midwinter_I	Fum	42.9412	0.248937	6.47511	248.937	6475.11	26.011	14652.7	0.3669	5.44086	5.07396	5.40347	50739.6	-26.2028	1382.42	12.631	F2	Non-fum	42.9412	0.0458533	1.54245	45.8533	1542.45	33.6389	1960.29	0.3668	1.07649	0.709586	5.70018	7095.86	-24.8355	0.325369	12.3056	487569	116.088
Southern	F2	Midwinter_II	Fum	46.4521	0.0621669	0.689415	62.1669	689.415	11.0897	6507.03	0.3669	2.68548	2.31858	2.77914	23185.8	-24.615	1621.99	1.44139	F2	Non-fum	46.4521	0.00211384	0.0406	2.11384	40.6	19.2068	552.697	0.3668	0.567532	0.200632	2.72559	2006.32	-18.8864	0.00424104	1.43715	56942.2	13.5577
Southern	F3	Early_Winter	Fum	47.0179	0.0351279	0.51855	35.1279	518.55	14.7618	43599.1	0.3669	14.0854	13.7185	5.33	137185	-18.0854	1257.37	4.81901	F3	Non-fum	47.0179	0.0437599	0.725532	43.7599	725.532	16.5798	11670.1	0.3668	4.45025	4.08335	5.3247	40833.5	-19.5737	1.78687	3.03214	86219.1	20.5284
Southern	F3	Late_Winter_C	Fum	51.6484	0.0258742	0.341095	25.8742	341.095	13.1828	9936.19	0.3669	3.86477	3.49787	4.84967	34978.7	-25.654	906.56	0.905048	F3	Non-fum	51.6484	0.00987635	0.238633	9.87635	238.633	24.1621	8892.71	0.3668	3.50895	3.14205	4.83033	31420.5		0.31032	0.594727	16911.1	4.02645
Southern	F3	Midwinter_I	Fum	68.7158	0.124354	1.61111	124.354	1611.11	12.9558	9933.46	0.3669	3.86385	3.49695	1.56108	34969.5	-24.7715	413.856	4.34861	F3	Non-fum	68.7158	0.0305091	0.572771	30.5091	572.771	18.7738	4539.82	0.3668	1.99579	1.62889	1.56734	16288.9	-23.8138	0.496961	3.85164	109522	26.0766
Southern	F3	Midwinter_II	Fum	71.26	0.054715	0.783586	54.715	783.586	14.3212	18230.8	0.3669	6.6025	6.2356	2.874	62356	-22.51	887.775	3.41181	F3	Non-fum	71.26	0.0293377	0.509525	29.3377	509.525	17.3676	6343.43	0.3668	2.62849	2.26159	2.89699	22615.9	-22.5546	0.663499	2.74831	78148.4	18.6068
Southern	F4	Early_Winter	Fum	23.662	0.0266074	0.392319	26.6074	392.319	14.7447	38171.7	0.3669	12.587	12.2201	3.8627	122201	-27.8488	1227.03	3.25146	F4	Non-fum	23.662	0.0105941	0.174752	10.5941	174.752	16.4952	2517.38	0.3668	1.27648	0.909584	3.80163	9095.84	-22.5002	0.0963621	3.1551	117824	28.0534
Southern	F4	Late_Winter_C	Fum	24.5669	0.0346092	0.357106	34.6092	357.106	10.3182	9327.46	0.3669	3.65752	3.29062	7.6112	32906.2	-29.6904	799.503	1.13886	F4	Non-fum	24.5669	0.0049615	0.092922	4.9615	92.922	18.7286	2416.15	0.3668	1.2402	0.873304	7.6112	8733.04		0.043329	1.09553	40911.5	9.74082
Southern	F4	Midwinter_I	Fum	23.9709	0.0223683	0.345143	22.3683	345.143	15.43	17790.1	0.3669	6.46098	6.09408	7.5953	60940.8	-25.8304	1362.41	1.36314	F4	Non-fum	23.9709	0.00764745	0.17403	7.64745	174.03	22.7566	1564.71	0.3668	0.933982	0.567082	7.56489	5670.82	-26.7085	0.0433673	1.31977	49285.7	11.7347
Southern	F4	Midwinter_II	Fum	28.4514	0.0223284	0.316137	22.3284	316.137	14.1585	12599.9	0.3669	4.76129	4.39439	7.20494	43943.9	-25.1818	1104.74	0.981196	F4	Non-fum	28.4514	0.00176611	0.0412077	1.76611	41.2077	23.3325	1391.17	0.3668	0.871335	0.504435	7.1477	5044.35	-21.1065	0.00890888	0.972287	36309.2	8.64504
Southern	F5	Early_Winter	Fum	77.7778	0.0205241	0.471431	20.5241	471.431	22.9697	25241.8	0.3669	8.7978	8.4309	1.10444	84309	-25.9552	102.671	1.73036	F5	Non-fum	77.7778	0.00729553	0.250752	7.29553	250.752	34.3707	1284.04	0.3668	0.832621	0.465721	1.11778	4657.21	-24.4201	0.0339769	1.69639	15933.4	3.79365
Southern	F5	Late_Winter_WW	Fum	47.9576	0.00346118	0.0669938	3.46118	66.9938	19.3558	15149.6	0.3669	5.60393	5.23703	5.22505	52370.3	-22.8148	792.436	0.181263	F5	Non-fum	47.9576	0.00470055	0.214544	4.70055	214.544	45.6424	663.652	0.3668	0.607841	0.240941	5.24587	2409.41		0.0113256	0.169937	1596.14	0.380033
Southern	F5	Midwinter_I	Fum	76	0.089287	1.79562	89.287	1795.62	20.1106	24413.5	0.3669	8.54384	8.17694	1.2072	81769.4	-25.5942	88.3841	7.30095	F5	Non-fum	76	0.0338632	0.746661	33.8632	746.661	22.0494	1345.14	0.3668	0.854704	0.487804	1.1976	4878.04	-23.5376	0.165186	7.13576	67022.8	15.9578
Southern	F5	Midwinter_II	Fum	78.4349	0.0659243	1.36352	65.9243	1363.52	20.683	23942.2	0.3669	8.39869	8.03179	1.08688	80317.9	-26.7796	187.945	5.2949	F5	Non-fum	78.4349	0.0156623	0.409049	15.6623	409.049	26.1167	2723.05	0.3668	1.35011	0.983214	1.08257	9832.14	-23.3543	0.153994	5.14091	48286.1	11.4967
Southern	F6	Early_Winter	Fum	55.4299	0.0460108	0.895941	46.0108	895.941	19.4724	27025.8	0.3669	9.34005	8.97315	4.49267	89731.5	-24.6666	914.808	4.12862	F6	Non-fum	55.4299	0.0210459	0.460997	21.0459	460.997	21.9044	695.449	0.3668	0.619387	0.252487	4.47038	2524.87	-23.5585	0.0531381	4.07548	101524	24.1725
Southern	F6	Late_Winter_WW	Fum	15.6535	0.00624678	0.145389	6.24678	145.389	23.2743	32114.2	0.3669	10.8518	10.4849	8.56117	104849	-25.9872	1590.18	0.654969	F6	Non-fum	15.6535	0.00495541	0.216836	4.95541	216.836	43.7574	3964.8	0.3668	1.79235	1.42545	8.42622	14254.5		0.070637	0.584332	14556.3	3.46579
Southern	F6	Midwinter_I	Fum	66.6667	0.479064	8.76247	479.064	8762.47	18.2908	10216.2	0.3669	3.9598	3.5929	3.16667	35929	-26.2175	657.468	17.2123	F6	Non-fum	66.6667	0.116216	1.55702	116.216	1557.02	13.3977	2146.15	0.3668	1.1433	0.776401	3.27333	7764.01	-23.5619	0.902303	16.31	406299	96.7378
Southern	F6	Midwinter_II	Fum	57.6182	0.149151	2.17363	149.151	2173.63	14.5733	7405.12	0.3669	2.99712	2.63022	4.22123	26302.2	-25.4843	987.064	3.92301	F6	Non-fum	57.6182	0.0134016	0.465716	13.4016	465.716	34.7507	903.929	0.3668	0.69502	0.32812	4.1958	3281.2	-25.2854	0.0439734	3.87904	96630.7	23.0073
Southern	F7	Early_Winter	Fum	29.1743	0.0298462	0.493678	29.8462	493.678	16.5407	23737.7	0.3669	8.33557	7.96867	7.0684	79686.7	-25.311	1237.48	2.37835	F7	Non-fum	29.1743	0.00450357	0.0893102	4.50357	89.3102	19.831	814.235	0.3668	0.662495	0.295595	7.12506	2955.95	-20.0064	0.0133123	2.36504	87957.3	20.9422
Southern	F7	Late_Winter_WW	Fum	68.3794	0.00525783	0.0851808	5.25783	85.1808	16.2007	11811.7	0.3669	4.49774	4.13084	1.58419	41308.4	-22.7351	1101.75	0.217193	F7	Non-fum	68.3794	0.00481367	0.136088	4.81367	136.088	28.2711	1174.43	0.3668	0.792983	0.426083	1.58103	4260.83		0.0205102	0.196683	7314.75	1.74161
Southern	F7	Midwinter_I	Fum	31.1311	0.0141882	0.206876	14.1882	206.876	14.5808	26567.3	0.3669	9.2013	8.8344	6.94198	88344	-24.8949	1237.48	1.25344	F7	Non-fum	31.1311	0.0130069	0.456682	13.0069	456.682	35.1106	3147.34	0.3668	1.50167	1.13477	6.90066	11347.7	-26.6998	0.147599	1.10585	41127.1	9.79217
Southern	F7	Midwinter_II	Fum	35.8819	0.0217302	0.284499	21.7302	284.499	13.0923	14226	0.3669	5.3004	4.9335	6.50799	49335	-24.8729	1237.48	1.07206	F7	Non-fum	35.8819	0.00115966	0.0197802	1.15966	19.7802	17.0568	584.699	0.3668	0.579162	0.212262	6.49516	2122.62	-13.0602	0.00246152	1.0696	39779.2	9.47123
Southern	F8	Early_Winter	Fum	40.8978	0.0322726	0.519609	32.2726	519.609	16.1006	27491	0.3669	9.48037	9.11347	5.94569	91134.7	-23.2637	1860.17	2.94116	F8	Non-fum	40.8978	0.00851264	0.187132	8.51264	187.132	21.9829	1072.51	0.3668	0.756095	0.389195	5.93387	3891.95	-21.2602	0.0331308	2.90803	244305	58.1679
Southern	F8	Late_Winter_WW	Fum	40.2928	0.011764	0.166782	11.764	166.782	14.1773	17546.1	0.3669	6.38241	6.01551	5.98863	60155.1	-24.5941	1805.46	0.707663	F8	Non-fum	40.2928	0.00216309	0.0339046	2.16309	33.9046	15.6742	457.567	0.3668	0.532946	0.166046	5.96475	1660.46		0.00359173	0.704071	59149.5	14.0832
Southern	F8	Midwinter_I	Fum	41.4239	0.0420731	0.582179	42.0731	582.179	13.8373	9457.77	0.3669	3.70196	3.33506	5.87518	33350.6	-25.9542	2600.15	1.40316	F8	Non-fum	41.4239	0.00277695	0.0566895	2.77695	56.6895	20.4143	1345.97	0.3668	0.855005	0.488105	5.88689	4881.05	-21.6504	0.0135544	1.38961	116742	27.7957
Southern	F8	Midwinter_II	Fum	40.8071	0.0509927	0.652515	50.9927	652.515	12.7963	12545.5	0.3669	4.74315	4.37625	5.96664	43762.5	-25.179	3705.51	2.23156	F8	Non-fum	40.8071	0.00750776	0.185657	7.50776	185.657	24.7287	1197.99	0.3668	0.801505	0.434605	6.014	4346.05	-24.0461	0.0326291	2.19894	184734	43.9843
Eastern	K1	Early_Winter	Fum	30.401	0.00778303	0.113229	7.78303	113.229	14.5483	15462	0.3669	5.70614	5.33924	6.98078	53392.4	-23.0343	2142.61	0.415555	K1	Non-fum	30.401	0.00482755	0.162056	4.82755	162.056	33.569	2689.48	0.3668	1.3381	0.971204	6.93902	9712.04	-25.3773	0.0468854	0.368669	22031.9	5.24568
Eastern	K1	Late_Winter_C	Fum	30.6705	0.0194143	0.302176	19.4143	302.176	15.5646	12760.2	0.3669	4.81472	4.44782	6.91215	44478.2	-27.3569	1882.17	0.863511	K1	Non-fum	30.6705	0.0160748	0.245583	16.0748	245.583	15.2775	7064.35	0.3668	2.8791	2.5122	6.91909	25122		0.403833	0.459678	27470.6	6.54062
Eastern	K1	Midwinter_I	Fum	33.7875	0.026167	0.286966	26.167	286.966	10.9667	11481.8	0.3669	4.38704	4.02014	6.6676	40201.4	-25.1003	1882.86	1.05195	K1	Non-fum	33.7875	0.0203569	0.254706	20.3569	254.706	12.5121	6360.21	0.3668	2.63434	2.26744	6.64774	22674.4	-25.2295	0.461579	0.590371	35280.9	8.40021
Eastern	K1	Midwinter_II	Fum	35.89	0.0296107	0.885191	29.6107	885.191	29.8943	8065.45	0.3669	3.22499	2.85809	6.43023	28580.9	-28.9416	1783.25	0.846298	K1	Non-fum	35.89	0.00639443	0.0629123	6.39443	62.9123	9.83861	11422.2	0.3668	4.367	4.0001	6.43664	40001	-23.6291	0.255784	0.590515	35289.5	8.40225
Eastern	K2	Early_Winter	Fum	39.1304	0.0470468	0.669524	47.0468	669.524	14.231	25947.7	0.3669	9.01314	8.64624	3.04957	86462.4	-27.3662	1700.81	4.06778	K2	Non-fum	39.1304	0.00931494	0.131481	9.31494	131.481	14.1151	1763.47	0.3668	1.00564	0.638737	3.02522	6387.37	-18.7618	0.059498	4.00828	204903	48.7863
Eastern	K2	Late_Winter_C	Fum	39.4515	0.0188111	0.237312	18.8111	237.312	12.6155	15563.9	0.3669	5.73943	5.37253	6.05485	53725.3	-28.5388	1879.99	1.01063	K2	Non-fum	39.4515	0.0061782	0.072185	6.1782	72.185	11.6838	3449.48	0.3668	1.60931	1.24241	6.08513	12424.1		0.0767582	0.933874	47739.5	11.3665
Eastern	K2	Midwinter_I	Fum	41.3924	0.0391901	0.625953	39.1901	625.953	15.9722	14719.6	0.3669	5.46286	5.09596	3.02415	50959.6	-28.0803	1392.54	1.99711	K2	Non-fum	41.3924	0.0144603	0.232671	14.4603	232.671	16.0903	13213.7	0.3668	4.96551	4.59861	2.92452	45986.1	-25.4474	0.664975	1.33214	68098.7	16.214
Eastern	K2	Midwinter_II	Fum	37.0546	0.0329298	0.416791	32.9298	416.791	12.657	9856.1	0.3669	3.83756	3.47066	6.30083	34706.6	-26.8745	1347.94	1.14288	K2	Non-fum	37.0546	0.0137409	0.194826	13.7409	194.826	14.1786	10775.4	0.3668	4.14904	3.78214	6.38266	37821.4	-26.8043	0.519701	0.623179	31856.8	7.58495
Eastern	K3	Early_Winter	Fum	43.7908	0.0316372	0.605353	31.6372	605.353	19.1342	28571.1	0.3669	9.80454	9.43764	5.61529	94376.4	-28.7358	2062.43	2.9858	K3	Non-fum	43.7908	0.0131759	0.247623	13.1759	247.623	18.7937	1084.95	0.3668	0.760598	0.393698	5.64902	3936.98	-24.2605	0.0518731	2.93393	175153	41.703
Eastern	K3	Late_Winter_C	Fum	53.6697	0.0179453	0.327577	17.9453	327.577	18.2541	17863.6	0.3669	6.48461	6.11771	4.63766	61177.1	-29.2994	1057.3	1.09784	K3	Non-fum	53.6697	0.0107397	0.375639	10.7397	375.639	34.9769	1767.83	0.3668	1.00721	0.640308	4.62839	6403.08		0.0687669	1.02908	61434.8	14.6273
Eastern	K3	Midwinter_I	Fum	44.0909	0.406334	6.80618	406.334	6806.18	16.7502	7492.41	0.3669	3.0273	2.6604	5.55736	26604	-28.0742	1544.35	10.8101	K3	Non-fum	44.0909	0.0956218	1.5372	95.6218	1537.2	16.0759	1042.19	0.3668	0.745117	0.378217	5.535	3782.17	-24.8304	0.361657	10.4485	623763	148.515
Eastern	K3	Midwinter_II	Fum	41.8277	0.073293	1.33162	73.293	1331.62	18.1684	8058.05	0.3669	3.22244	2.85554	5.9103	28555.4	-27.331	1891.74	2.09291	K3	Non-fum	41.8277	0.014218	0.36349	14.218	363.49	25.5654	1589.51	0.3668	0.942929	0.576029	5.8405	5760.29	-25.7015	0.0818998	2.01101	120055	28.5846
Eastern	K4	Early_Winter	Fum	49.5455	0.0296605	0.399127	29.6605	399.127	13.4565	28761	0.3669	9.86129	9.49439	2.53282	94943.9	-23.2625	2153.03	2.81608	K4	Non-fum	49.5455	0.00941366	0.12076	9.41366	120.76	12.8281	779.693	0.3668	0.649963	0.283063	2.51768	2830.63	-18.5083	0.0266466	2.78943	177324	42.2201
Eastern	K4	Late_Winter_C	Fum	36.0032	0.0158549	0.170182	15.8549	170.182	10.7337	17463	0.3669	6.35565	5.98875	6.45088	59887.5	-27.3005	1740.84	0.949511	K4	Non-fum	36.0032	0.00490552	0.0607123	4.90552	60.7123	12.3763	1047.01	0.3668	0.746862	0.379962	6.47648	3799.62		0.0186391	0.930872	59175.5	14.0894
Eastern	K4	Midwinter_I	Fum	47.6516	0.0193736	0.266136	19.3736	266.136	13.7371	18813.5	0.3669	6.78898	6.42208	5.24531	64220.8	-23.7167	1424.37	1.24419	K4	Non-fum	47.6516	0.0157346	0.200809	15.7346	200.809	12.7622	847.567	0.3668	0.674584	0.307684	5.23484	3076.84	-24.2008	0.0484129	1.19577	76015.4	18.0989
Eastern	K4	Midwinter_II	Fum	46.8262	0.0257665	0.311416	25.7665	311.416	12.0861	13083.5	0.3669	4.92226	4.55536	5.31206	45553.6	-25.804	1707.32	1.17376	K4	Non-fum	46.8262	0.00638306	0.123622	6.38306	123.622	19.3672	1200.89	0.3668	0.802554	0.435654	5.30143	4356.54	-23.9956	0.027808	1.14595	72848.2	17.3448
Eastern	K5	Early_Winter	Fum	32.3404	0.183176	2.90979	183.176	2909.79	15.8852	12140.8	0.3669	4.60798	4.24108	6.75243	42410.8	-27.6102	2875.74	7.76865	K5	Non-fum	32.3404	0.0149272	0.238696	14.9272	238.696	15.9907	543.604	0.3668	0.564227	0.197327	6.75243	1973.27	-19.7478	0.0294554	7.7392	628503	149.644
Eastern	K5	Late_Winter_WW	Fum	38.483	0.01267	0.159339	12.67	159.339	12.5761	20202.5	0.3669	7.2305	6.8636	6.21937	68636	-26.2808	2600.24	0.869618	K5	Non-fum	38.483	0.00539638	0.080953	5.39638	80.953	15.0013	788.1	0.3668	0.653013	0.286113	6.18246	2861.13		0.0154398	0.854178	69368.1	16.5162
Eastern	K5	Midwinter_I	Fum	43.9539	0.0918402	1.27277	91.8402	1272.77	13.8585	6259.92	0.3669	2.59938	2.23248	5.58779	22324.8	-26.0343	3560.05	2.05031	K5	Non-fum	43.9539	0.0197724	0.390747	19.7724	390.747	19.7622	991.871	0.3668	0.72689	0.35999	5.58779	3599.9	-23.7318	0.0711786	1.97913	160726	38.2681
Eastern	K5	Midwinter_II	Fum	41.9755	0.0672856	0.816333	67.2856	816.333	12.1324	6175.35	0.3669	2.56987	2.20297	5.84887	22029.7	-25.5318	1033.37	1.48228	K5	Non-fum	41.9755	0.0116451	0.19882	11.6451	198.82	17.0732	644.58	0.3668	0.600915	0.234015	5.87788	2340.15	-24.542	0.0272513	1.45503	118164	28.1342
Eastern	K6	Early_Winter	Fum	50.7874	0.758991	8.97265	758.991	8972.65	11.8218	3229.87	0.3669	1.53109	1.16419	3.4498	11641.9	-26.1355	1669.97	8.83611	K6	Non-fum	50.7874	0.272622	3.81395	272.622	3813.95	13.9899	4668.23	0.3668	2.04111	1.67421	3.45472	16742.1	-26.1347	4.56426	4.27185	143800	34.238
Eastern	K6	Late_Winter_WW	Fum	36.2802	0.189109	1.88237	189.109	1882.37	9.95386	5601.95	0.3669	2.36937	2.00247	6.44844	20024.7	-26.9193	3251.4	3.78686	K6	Non-fum	36.2802		0.943593		943.593			0.3668	0.731405	0.364505	6.46118
Eastern	K6	Midwinter_I	Fum	66.1364	0.788045	8.13343	788.045	8133.43	10.321	2094.15	0.3669	1.12462	0.757719	1.69318	7577.19	-27	528.627	5.97117	K6	Non-fum	66.1364	0.295395	3.42664	295.395	3426.64	11.6002	2622	0.3668	1.31395	0.947051	1.69318	9470.51	-25.1267	2.79754	3.17362	106831	25.436
Eastern	K6	Midwinter_II	Fum	60.1781	0.215117	2.39616	215.117	2396.16	11.1389	3767.17	0.3669	1.72223	1.35533	2.01897	13553.3	-24.9886	971.273	2.91555	K6	Non-fum	60.1781	0.116159	1.55993	116.159	1559.93	13.4292	3982.56	0.3668	1.79865	1.43175	2.01499	14317.5	-25.7599	1.6631	1.25244	42160	10.0381
Eastern	K7	Early_Winter	Fum	40.7545	0.215395	3.13801	215.395	3138.01	14.5687	10867.5	0.3669	4.18013	3.81323	2.75492	38132.3	-28.3035	1256.96	8.21348	K7	Non-fum	40.7545	0.0511476	0.751086	51.1476	751.086	14.6847	690.032	0.3668	0.61742	0.25052	2.96228	2505.2	-25.4711	0.128135	8.08535	422647	100.63
Eastern	K7	Late_Winter_WW	Fum	35.9426	0.0208944	0.233163	20.8944	233.163	11.1591	13097.5	0.3669	4.92691	4.56001	6.45699	45600.1	-27.8007	2903.46	0.952786	K7	Non-fum	35.9426	0.00673002	0.0984953	6.73002	98.4953	14.6352	1004.34	0.3668	0.749212	0.382312	6.40574	3645.05		0.0257296	0.927056	48460.2	11.5381
Eastern	K7	Midwinter_I	Fum	44.0393	0.0207914	0.235088	20.7914	235.088	11.307	2422.25	0.3669	1.24239	0.87549	5.65763	8754.9	-25.5467	1828.79	0.182026	K7	Non-fum	44.0393	0.00441433	0.0805734	4.41433	80.5734	18.2527	781.079	0.3668	0.650466	0.283566	5.60167	2835.66	-20.1724	0.0125175	0.169509	8860.76	2.10971
Eastern	K7	Midwinter_II	Fum	44.9076	0.0101139	0.113958	10.1139	113.958	11.2675	20782.6	0.3669	7.41366	7.04676	5.56984	70467.6	-23.9057	2074.96	0.712702	K7	Non-fum	44.9076	0.00451545	0.0683464	4.51545	68.3464	15.1361	1096.13	0.3668	0.764646	0.397746	5.56984	3977.46	-23.9228	0.01796	0.694742	36316.4	8.64675
Eastern	K8	Early_Winter	Fum	39.2857	0.0631279	0.744831	63.1279	744.831	11.7988	11723.2	0.3669	4.46806	4.10116	6.10786	41011.6	-24.8142	2540.54	2.58898	K8	Non-fum	39.2857	0.0182475	0.212894	18.2475	212.894	11.667	1151.48	0.3668	0.784677	0.417777	6.06536	4177.77	-23.2666	0.0762341	2.51274	176387	41.9968
Eastern	K8	Late_Winter_WW	Fum	33.7239	0.0280146	0.274225	28.0146	274.225	9.78864	7912.97	0.3669	3.17246	2.80556	6.73365	28055.6	-25.2679	2614.28	0.785968	K8	Non-fum	33.7239	0.00572326	0.064867	5.72326	64.867	11.3339	1053.5	0.3668	1.40302	1.03612	6.62761	3823.12		0.0592999	0.726668	51009.8	12.1452
Eastern	K8	Midwinter_I	Fum	30.5794	0.0115302	0.141449	11.5302	141.449	12.2677	11545.4	0.3669	4.40838	4.04148	6.93512	40414.8	-23.5426	2157.71	0.465988	K8	Non-fum	30.5794	0.0204647	0.244374	20.4647	244.374	11.9412	570.534	0.3668	0.574014	0.207114	6.96983	2071.14	-24.5053	0.0423854	0.423603	29735.6	7.0799
Eastern	K8	Midwinter_II	Fum	38.9273	0.0303997	0.390573	30.3997	390.573	12.8479	9464.6	0.3669	3.70429	3.33739	6.15002	33373.9	-26.2012	1784.99	1.01456	K8	Non-fum	38.9273	0.00788677	0.121508	7.88677	121.508	15.4065	2613.16	0.3668	1.31079	0.943887	6.10117	9438.87	-22.095	0.0744422	0.940116	65993.2	15.7127
Southeastern	S1	Early_Winter	Fum	58.3333	0.0950321	1.28416	95.0321	1284.16	13.5129	7130.45	0.3669	2.90202	2.53512	4.17083	25351.2	-23.8045	1572.71	2.40918	S1	Non-fum	58.3333	0.0481416	0.627295	48.1416	627.295	13.0302	2375.77	0.3668	1.22572	0.858824	4.1625	8588.24	-24.1068	0.413451	1.99573	56137	13.3659
Southeastern	S1	Late_Winter_C	Fum	72.4444	0.0166819	0.18472	16.6819	184.72	11.0731	5267.56	0.3669	2.25207	1.88517	2.78587	18851.7	-24.3609	331.31	0.314482	S1	Non-fum	72.4444	0.0181993	0.248772	18.1993	248.772	13.6693	2871.02	0.3668	1.26025	0.893345	2.76658	10361.2		0.162582	0.151899	4272.72	1.01731
Southeastern	S1	Midwinter_I	Fum	67.9188	0.0117259	0.146822	11.7259	146.822	12.5212	3449.2	0.3669	1.60921	1.24231	3.20491	12423.1	-18.2609	974.895	0.145672	S1	Non-fum	67.9188	0.0482391	0.514297	48.2391	514.297	10.6614	3137.49	0.3668	1.49816	1.13126	3.22416	11312.6	-23.861	0.545707	-0.400036	-11252.4	-2.67915
Southeastern	S1	Midwinter_II	Fum	79.1171	0.152155	1.56934	152.155	1569.34	10.314	5354.23	0.3669	2.2825	1.9156	1.06712	19156	-24.5083	766.548	2.91468	S1	Non-fum	79.1171	0.0160971	0.296081	16.0971	296.081	18.3934	2272.77	0.3668	1.18877	0.821869	1.04623	8218.69	-24.3231	0.132297	2.78239	78264.6	18.6344
Southeastern	S2	Early_Winter	Fum	31.2329	0.0665751	1.4126	66.5751	1412.6	21.2181	14643.3	0.3669	5.43777	5.07087	3.45899	50708.7	-27.0578	1323.47	3.37593	S2	Non-fum	31.2329	0.0208063	0.248076	20.8063	248.076	11.9231	459.839	0.3668	0.533772	0.166872	3.43836	1668.72	-23.5064	0.0347199	3.34121	124936	29.7466
Southeastern	S2	Late_Winter_C	Fum	60.9215	0.00752985	0.119374	7.52985	119.374	15.8534	18598.2	0.3669	6.72014	6.35324	3.98601	63532.4	-26.3518	820.279	0.478389	S2	Non-fum	60.9215	0.00780993	0.101319	7.80993	101.319	12.9732	2472.06	0.3668	3.05957	2.69267	3.90003	8933.45		0.210296	0.268094	10024.6	2.38682
Southeastern	S2	Midwinter_I	Fum	38.3333	0.0368807	0.641539	36.8807	641.539	17.3949	18590.5	0.3669	6.71769	6.35079	6.15433	63507.9	-25.2809	1189.06	2.34222	S2	Non-fum	38.3333	0.0608876	0.698897	60.8876	698.897	11.4785	1068.28	0.3668	0.754561	0.387661	6.15433	3876.61	-24.9853	0.236038	2.10618	78755	18.7512
Southeastern	S2	Midwinter_II	Fum	40.0636	0.0637526	1.0616	63.7526	1061.6	16.6519	10115.5	0.3669	3.92566	3.55876	5.95768	35587.6	-26.7795	1129.56	2.2688	S2	Non-fum	40.0636	0.0158448	0.180023	15.8448	180.023	11.3616	10686.6	0.3668	4.11905	3.75215	5.96367	37521.5	-24.3498	0.59452	1.67428	62605.4	14.906
Southeastern	S3	Early_Winter	Fum	29.4461	0.102031	1.00619	102.031	1006.19	9.86159	3614.06	0.3669	1.66784	1.30094	3.55592	13009.4	-25.114	1476.81	1.32736	S3	Non-fum	29.4461	0.0107993	0.122106	10.7993	122.106	11.3068	3031	0.3668	1.46016	1.09326	3.50653	10932.6	-18.7715	0.118065	1.2093	59552.6	14.1792
Southeastern	S3	Late_Winter_C	Fum	17.8236	0.0147334	0.111322	14.7334	111.322	7.5558	8367.31	0.3669	3.3288	2.9619	8.28338	29619	-24.1734	1399.61	0.436387	S3	Non-fum	17.8236	0.0149675	0.124252	14.9675	124.252	8.30145	7585.79	0.3668	3.0916	2.7247	8.30803	26926.7		0.40782	0.028567	1406.8	0.334953
Southeastern	S3	Midwinter_I	Fum	36.385	0.0160319	0.157424	16.0319	157.424	9.81946	10209.8	0.3669	3.95765	3.59075	6.38695	35907.5	-23.1997	1331.37	0.575664	S3	Non-fum	36.385	0.00832685	0.0928798	8.32685	92.8798	11.1543	10610.1	0.3668	4.09318	3.72628	6.39331	37262.8	-22.0386	0.310281	0.265383	13069	3.11166
Southeastern	S3	Midwinter_II	Fum	32.0874	0.095449	0.785386	95.449	785.386	8.22833	4095.27	0.3669	1.83858	1.47168	6.79805	14716.8	-25.5748	1841.01	1.40471	S3	Non-fum	32.0874	0.011347	0.289861	11.347	289.861	25.5451	3668.05	0.3668	1.68703	1.32013	6.77768	13201.3	-24.5995	0.149795	1.25491	61799	14.714
Southeastern	S4	Early_Winter	Fum	43.2077	0.0323778	0.543891	32.3778	543.891	16.7983	20615.1	0.3669	7.36086	6.99396	2.83393	69939.6	-23.0986	1457.66	2.26449	S4	Non-fum	43.2077	0.0121707	0.29401	12.1707	294.01	24.1572	3761.01	0.3668	1.72004	1.35314	2.82258	13531.4	-23.9932	0.164687	2.0998	77497.1	18.4517
Southeastern	S4	Late_Winter_C	Fum	48.6685	0.0323365	0.469102	32.3365	469.102	14.5069	7235.42	0.3669	2.93839	2.57149	2.61277	25714.9	-24.5283	2084.53	0.831528	S4	Non-fum	48.6685	0.0138127	0.264809	13.8127	264.809	19.1714	7678.53	0.3668	0.366808	-9.19603e-05	2.56144	27247		-1.27022e-05	0.831541	88385.9	21.0443
Southeastern	S4	Midwinter_I	Fum	69.6663	0.042302	0.592855	42.302	592.855	14.0148	14945	0.3669	5.53685	5.16995	3.05763	51699.5	-23.4416	2573.88	2.18699	S4	Non-fum	69.6663	0.0309544	0.58703	30.9544	587.03	18.9643	4007.86	0.3668	1.80761	1.44071	3.02427	14407.1	-24.9276	0.445965	1.74103	185057	44.0612
Southeastern	S4	Midwinter_II	Fum	64.4158	0.106025	1.40425	106.025	1404.25	13.2445	8213.73	0.3669	3.27601	2.90911	1.78277	29091.1	-24.6263	3499.35	3.08439	S4	Non-fum	64.4158							0.3668			1.78989
Southeastern	S5	Early_Winter	Fum	32.6498	0.0310322	0.389767	31.0322	389.767	12.5601	3606.58	0.3669	1.66518	1.29828	3.41465	12982.8	-24.732	2610.51	0.402885	S5	Non-fum	32.6498	0.0110045	0.150154	11.0045	150.154	13.6449	1599.53	0.3668	0.946542	0.579642	3.36077	5796.42	-24.0226	0.0637864	0.339099	27320.6	6.5049
Southeastern	S5	Late_Winter_WW	Fum	33.0625	0.0718098	0.708053	71.8098	708.053	9.86012	2851.86	0.3669	1.39617	1.02927	6.76069	10292.7	-25.687	2551.45	0.739119	S5	Non-fum	33.0625	0.0206275	0.254074	20.6275	254.074	12.3172	4611.8	0.3668	2.0212	1.6543	6.72722	16543		0.341242	0.397878	32056.3	7.63245
Southeastern	S5	Midwinter_I	Fum	36.5828	0.0138024	0.141954	13.8024	141.954	10.2847	6743.51	0.3669	2.76773	2.40083	6.3544	24008.3	-24.0305	2808.69	0.331372	S5	Non-fum	36.5828	0.0104032	0.10348	10.4032	103.48	9.94694	5047.14	0.3668	2.17459	1.80769	6.33538	18076.9	-23.7789	0.188057	0.143315	11546.6	2.74919
Southeastern	S5	Midwinter_II	Fum	49.2269	0.051256	0.457509	51.256	457.509	8.92597	4316.99	0.3669	1.91706	1.55016	2.57927	15501.6	-25.0725	2588.32	0.794548	S5	Non-fum	49.2269	0.00749184	0.100212	7.49184	100.212	13.3762	3308.7	0.3668	1.55918	1.19228	2.55896	11922.8	-23.6478	0.089324	0.705224	56818.6	13.5282
Southeastern	S6	Early_Winter	Fum	64.3766	0.0394127	0.442383	39.4127	442.383	11.2244	11244.1	0.3669	4.30708	3.94018	1.7883	39401.8	-21.6433	856.311	1.55293	S6	Non-fum	64.3766	0.0686703	0.96086	68.6703	960.86	13.9924	6689.25	0.3668	2.74887	2.38197	1.79186	23819.7	-26.9302	1.63571	-0.0827738	-4242.02	-1.01001
Southeastern	S6	Late_Winter_WW	Fum	28.887	0.0544107	0.66012	54.4107	660.12	12.1322	4253.82	0.3669	1.89471	1.52781	7.11841	15278.1	-25.8773	2599.57	0.831293	S6	Non-fum	28.887	0.0164129	0.272911	16.4129	272.911	16.6278	4525.68	0.3668	1.9908	1.6239	7.16819	16239		0.266529	0.564763	28943.2	6.89124
Southeastern	S6	Midwinter_I	Fum	29.3233	0.534506	5.96657	534.506	5966.57	11.1628	4106.57	0.3669	1.84259	1.47569	6.45985	14756.9	-26.2912	3496.7	7.88763	S6	Non-fum	29.3233	0.211183	3.00279	211.183	3002.79	14.2189	1810.63	0.3668	1.02262	0.655721	7.0818	6557.21	-26.3271	1.38477	6.50286	333261	79.3478
Southeastern	S6	Midwinter_II	Fum	57.0106	0.108174	0.791752	108.174	791.752	7.31926	4731.93	0.3669	2.06358	1.69668	2.17097	16966.8	-24.7122	1329.89	1.83536	S6	Non-fum	57.0106	0.017452	0.230535	17.452	230.535	13.2097	3865.82	0.3668	1.75724	1.39034	2.19246	13903.4	-24.1837	0.242643	1.59272	81624.1	19.4343
Southeastern	S7	Early_Winter	Fum	43.2077	0.0680307	0.797929	68.0307	797.929	11.7289	2674.23	0.3669	1.33265	0.965748	2.26033	9657.48	-24.3545	1549.58	0.657005	S7	Non-fum	43.2077	0.0440225	0.894241	44.0225	894.241	20.3133	246.959	0.3668	0.456291	0.0893907	2.36256	893.907	-26.9744	0.039352	0.617653	18645.2	4.43933
Southeastern	S7	Late_Winter_WW	Fum	64.5418	0.0717115	0.754716	71.7115	754.716	10.5243	4640.63	0.3669	2.03137	1.66447	3.56355	16644.7	-26.1861	68.8579	1.19362	S7	Non-fum	64.5418	0.0156477	0.30534	15.6477	305.34	19.5134	3353.91	0.3668	1.57529	1.20839	3.53518	12083.9		0.189084	1.00454	10819.9	2.57617
Southeastern	S7	Midwinter_I	Fum	76.5289	0.143582	2.6002	143.582	2600.2	18.1095	11304.5	0.3669	4.32741	3.96051	1.17355	39605.1	-26.9514	626.282	5.68657	S7	Non-fum	76.5289	0.0549248	1.15753	54.9248	1157.53	21.0748	1344.31	0.3668	0.854407	0.487507	1.18998	4875.07	-23.9886	0.267762	5.41881	58366.3	13.8967
Southeastern	S7	Midwinter_II	Fum	79.9528	0.180183	1.69272	180.183	1692.72	9.39448	8537.14	0.3669	3.38711	3.02021	1.03444	30202.1	-25.4947	121.671	5.4419	S7	Non-fum	79.9528	0.0146963	0.233626	14.6963	233.626	15.897	1867.72	0.3668	1.04318	0.676276	1.02842	6762.76	-20.7188	0.0993874	5.34251	57544.5	13.7011
Southeastern	S8	Early_Winter	Fum	43.2077	0.0308419	0.51521	30.8419	515.21	16.7049	25214	0.3669	8.78932	8.42242	2.97024	84224.2	-25.5909	1545.72	2.59763	S8	Non-fum	43.2077	0.0391174	0.602572	39.1174	602.572	15.4042	1095.09	0.3668	0.764269	0.397369	2.70899	3973.69	-26.3434	0.15544	2.44219	77927.7	18.5542
Southeastern	S8	Late_Winter_WW	Fum	62.9969	0.0242712	0.249136	24.2712	249.136	10.2647	6593.51	0.3669	2.71557	2.34867	1.87606	23486.7	-25.0329	125.2	0.570051	S8	Non-fum	62.9969	0.00922136	0.124031	9.22136	124.031	13.4504	2555.52	0.3668	1.29015	0.923245	1.85015	9232.45		0.0851357	0.484915	6469.81	1.54043
Southeastern	S8	Midwinter_I	Fum	74.5998	0.15251	1.59427	152.51	1594.27	10.4535	7317.67	0.3669	2.96686	2.59996	1.28271	25999.6	-25.9439	707.331	3.9652	S8	Non-fum	74.5998	0.0406091	0.48581	40.6091	485.81	11.9631	1626.58	0.3668	0.956296	0.589396	1.28525	5893.96	-23.7904	0.239348	3.72585	49710.8	11.8359
Southeastern	S8	Midwinter_II	Fum	55.6686	0.280899	2.50911	280.899	2509.11	8.93242	3883.41	0.3669	1.76349	1.39659	2.29193	13965.9	-25.326	220.306	3.92299	S8	Non-fum	55.6686	0.042636	0.62752	42.636	627.52	14.7181	784.359	0.3668	0.651656	0.284756	2.22544	2847.56	-24.4934	0.121409	3.80158	50721.3	12.0765
Northern	T1	Early_Winter	Fum	32.1048	0.0145702	0.204102	14.5702	204.102	14.0082	24356.4	0.3669	8.52628	8.15938	6.78952	81593.8	-26.7208	2194.16	1.18884	T1	Non-fum	32.1048	0.00710711	0.101081	7.10711	101.081	14.2225	16904.1	0.3668	6.17514	5.80824	6.86421	58082.4	-24.1246	0.412798	0.776039	53923.2	12.8389
Northern	T1	Late_Winter_WW	Fum	48.9996	0.030416	0.322701	30.416	322.701	10.6096	7414.31	0.3669	3.0003	2.6334	5.14084	26334	-26.3139	1171.2	0.800975	T1	Non-fum	48.9996	0.0233514	0.232982	23.3514	232.982	9.97723	387.841	0.3668	0.507581	0.140681	5.21734	1406.81		0.0328509	0.768124	53373.2	12.7079
Northern	T1	Midwinter_I	Fum	34.8249	0.101623	0.971306	101.623	971.306	9.5579	3576.59	0.3669	1.65452	1.28762	6.64786	12876.2	-26.2748	2181.6	1.30852	T1	Non-fum	34.8249	0.0323534	0.416081	32.3534	416.081	12.8605	4388.97	0.3668	1.9425	1.5756	6.53706	15756	-25.6722	0.509761	0.79876	55502	13.2148
Northern	T1	Midwinter_II	Fum	26.1704	0.0733035	0.691764	73.3035	691.764	9.43698	3753.44	0.3669	1.71735	1.35045	7.38296	13504.5	-25.5117	2073.58	0.989931	T1	Non-fum	26.1704	0.0118455	0.170335	11.8455	170.335	14.3797	5060.44	0.3668	2.17927	1.81237	7.36819	18123.7	-25.5236	0.214684	0.775247	53868.2	12.8258
Northern	T2	Early_Winter	Fum	36.1336	0.0366742	0.43142	36.6742	431.42	11.7636	9562.24	0.3669	3.73756	3.37066	6.39303	33706.6	-26.4991	1294.57	1.23616	T2	Non-fum	36.1336	0.0105075	0.184883	10.5075	184.883	17.5953	683.338	0.3668	0.61499	0.24809	6.44412	2480.9	-26.9351	0.0260681	1.21009	35604.9	8.47736
Northern	T2	Late_Winter_WW	Fum	32.5855	0.0191022	0.204735	19.1022	204.735	10.7179	10737.4	0.3669	4.13619	3.76929	6.8628	37692.9	-25.6075	1604.91	0.720016	T2	Non-fum	32.5855	0.0179033	0.197271	17.9033	197.271	11.0187	771.611	0.3668	0.64703	0.28013	6.74145	2801.3		0.0501527	0.669864	19709.6	4.69275
Northern	T2	Midwinter_I	Fum	56.7568	0.477543	5.47642	477.543	5476.42	11.4679	3803.16	0.3669	1.73501	1.36811	4.31135	13681.1	-26.8496	545.63	6.5333	T2	Non-fum	56.7568	0.144734	2.56496	144.734	2564.96	17.7218	408.844	0.3668	0.515223	0.148323	4.29405	1483.23	-27.2668	0.214674	6.31863	185914	44.2653
Northern	T2	Midwinter_II	Fum	55.9906	0.53654	4.9765	536.54	4976.5	9.27518	2289.75	0.3669	1.19486	0.827963	4.29972	8279.63	-26.2765	368.137	4.44235	T2	Non-fum	55.9906	0.147879	2.37214	147.879	2372.14	16.041	333.742	0.3668	0.487892	0.120992	4.48896	1209.92	-27.0738	0.178922	4.26343	125444	29.8676
Northern	T3	Early_Winter	Fum	43.9271	0.0202291	0.280193	20.2291	280.193	13.851	17447.9	0.3669	6.35078	5.98388	5.66336	59838.8	-24.7847	1536.33	1.21049	T3	Non-fum	43.9271	0.00797959	0.0943756	7.97959	94.3756	11.8271	308.432	0.3668	0.478677	0.111777	5.61289	1117.77	-22.3701	0.00891936	1.20157	60450.4	14.393
Northern	T3	Late_Winter_WW	Fum	36.7777	0.0199887	0.267645	19.9887	267.645	13.3898	13678.1	0.3669	5.11944	4.75254	6.44867	47525.4	-26.0831	2037.41	0.949972	T3	Non-fum	36.7777	0.0116017	0.128398	11.6017	128.398	11.0672	1126.84	0.3668	0.775761	0.408861	6.42971	4088.61		0.0474348	0.902537	45406.4	10.811
Northern	T3	Midwinter_I	Fum	48.9117	0.0476416	0.556502	47.6416	556.502	11.681	2289.1	0.3669	1.19463	0.827731	2.63616	8277.31	-23.9383	1228.5	0.394344	T3	Non-fum	48.9117	0.0119261	0.287348	11.9261	287.348	24.0941	591.021	0.3668	0.581458	0.214558	2.6004	2145.58	-25.1594	0.0255884	0.368756	18552	4.41714
Northern	T3	Midwinter_II	Fum	39.669	0.00598982	0.0783514	5.98982	78.3514	13.0808	13287.5	0.3669	4.98999	4.62309	6.11153	46230.9	-20.9778	1717.89	0.276915	T3	Non-fum	39.669	0.0094811	0.108946	9.4811	108.946	11.4909	1389.87	0.3668	0.870865	0.503965	6.07533	5039.65	-23.0783	0.0477814	0.229133	11527.6	2.74467
Northern	T4	Early_Winter	Fum	44.3793	0.0707928	0.90551	70.7928	905.51	12.791	5705.65	0.3669	2.4057	2.0388	5.61213	20388	-26.423	1537.07	1.44332	T4	Non-fum	44.3793	0.0112283	0.139623	11.2283	139.623	12.4349	206.531	0.3668	0.441562	0.0746622	5.59544	746.622	-23.6849	0.00838331	1.43494	86994.6	20.713
Northern	T4	Late_Winter_WW	Fum	33.2821	0.0271613	0.286697	27.1613	286.697	10.5553	10834	0.3669	4.16884	3.80194	6.75852	38019.4	-27.4173	2391.81	1.03266	T4	Non-fum	33.2821	0.0188653	0.212378	18.8653	212.378	11.2576	1271.27	0.3668	0.828004	0.461104	6.67846	4611.04		0.0869888	0.945669	57332.2	13.6505
Northern	T4	Midwinter_I	Fum	44.6602	0.392205	4.87021	392.205	4870.21	12.4175	6011	0.3669	2.51249	2.14559	5.39563	21455.9	-27.491	1792.46	8.41513	T4	Non-fum	44.6602	0.151165	1.91786	151.165	1917.86	12.6872	3752.78	0.3668	1.71712	1.35022	5.45097	13502.2	-24.7848	2.04106	6.37407	386435	92.0083
Northern	T4	Midwinter_II	Fum	43.155	0.122327	1.28585	122.327	1285.85	10.5116	3585.96	0.3669	1.65785	1.29095	5.46849	12909.5	-26.7652	2135.8	1.57918	T4	Non-fum	43.155	0.0166049	0.393928	16.6049	393.928	23.7235	616.73	0.3668	0.590799	0.223899	5.66745	2238.99	-26.8056	0.0371783	1.542	93485.3	22.2584
Northern	T5	Early_Winter	Fum	34.3313	0.0264991	0.309097	26.4991	309.097	11.6644	15148.4	0.3669	5.60352	5.23662	6.58	52366.2	-26.9283	1982.04	1.38766	T5	Non-fum	34.3313	0.0091136	0.0860186	9.1136	86.0186	9.43849	6121.12	0.3668	2.55095	2.18405	6.66537	21840.5	-22.8355	0.199045	1.18861	80516.3	19.1706
Northern	T5	Late_Winter_WW	Fum	61.9591	0.0364208	0.390534	36.4208	390.534	10.7228	7671.12	0.3669	3.08904	2.72214	3.78887	27221.4	-28.4232	1338.91	0.991425	T5	Non-fum	61.9591	0.0112743	0.13166	11.2743	131.66	11.678	2904.85	0.3668	1.41511	1.04821	3.85354	10482.1		0.118178	0.873248	59153.7	14.0842
Northern	T5	Midwinter_I	Fum	28.4553	0.102335	1.18344	102.335	1183.44	11.5644	10281.3	0.3669	3.98189	3.61499	7.11154	36149.9	-27.8768	1952.99	3.6994	T5	Non-fum	28.4553	0.0208307	0.247168	20.8307	247.168	11.8656	6156.07	0.3668	2.56315	2.19625	7.12585	21962.5	-24.2179	0.457493	3.24191	219607	52.2873
Northern	T5	Midwinter_II	Fum	35.9375	0.036195	0.330073	36.195	330.073	9.11931	4919.3	0.3669	2.1296	1.7627	6.46391	17627	-26.7298	2309.12	0.638007	T5	Non-fum	35.9375	0.00343775	0.046939	3.43775	46.939	13.654	4765.6	0.3668	2.07545	1.70855	6.48953	17085.5	-24.1037	0.0587355	0.579271	39239.8	9.3428
Northern	Y1	Early_Winter	Fum	54.3702	0.214231	1.65169	214.231	1651.69	7.70985	2180.67	0.3669	1.1557	0.788802	4.63599	7888.02	-25.9178	1107.23	1.68986	Y1	Non-fum	54.3702	0.0311748	0.346322	31.1748	346.322	11.109	8116.01	0.3668	3.24239	2.87549	4.64512	28754.9	-26.2222	0.896429	0.79343	21926.2	5.22053
Northern	Y1	Late_Winter_C	Fum	48.5526	0.0180622	0.146746	18.0622	146.746	8.12451	10992.8	0.3669	4.22239	3.85549	5.14474	38554.9	-25.584	601.838	0.696385	Y1	Non-fum	48.5526	0.0165673	0.14005	16.5673	140.05	8.4534	8647.8	0.3668	3.42506	3.05816	5.18075	30581.6		0.506656	0.189729	5243.12	1.24836
Northern	Y1	Midwinter_I	Fum	68.254	0.453357	3.21638	453.357	3216.38	7.0946	886.216	0.3669	0.688599	0.321699	1.66032	3216.99	-25.5907	510.436	1.45844	Y1	Non-fum	68.254	0.175625	1.03589	175.625	1035.89	5.8983	2924.11	0.3668	1.42199	1.05509	1.68254	10550.9	-26.0464	1.853	-0.394563	-10903.6	-2.5961
Northern	Y1	Midwinter_II	Fum	58.079	0.0729732	0.575602	72.9732	575.602	7.88785	3663.67	0.3669	1.68547	1.31857	4.1921	13185.7	-25.1974	685.638	0.962202	Y1	Non-fum	58.079	0.0476755	0.419499	47.6755	419.499	8.79906	4320.61	0.3668	1.91834	1.55144	4.22145	15514.4	-25.6834	0.739655	0.222547	6150.02	1.46429
Northern	Y2	Early_Winter	Fum	61.0984	0.270703	2.63341	270.703	2633.41	9.72806	1486.98	0.3669	0.905932	0.539032	3.89016	5390.32	-26.7954	390.086	1.45917	Y2	Non-fum	61.0984	0.0317247	0.442861	31.7247	442.861	13.9595	590.557	0.3668	0.58129	0.21439	3.89794	2143.9	-26.1481	0.0680145	1.39116	19500.3	4.64293
Northern	Y2	Late_Winter_C	Fum	66.0693	0.0180494	0.214032	18.0494	214.032	11.8581	7571.63	0.3669	3.05468	2.68778	3.39646	26877.8	-26.338	223.706	0.485128	Y2	Non-fum	66.0693	0.0319996	0.405954	31.9996	405.954	12.6862	2265.47	0.3668	1.18615	0.819248	3.38628	8192.48		0.262156	0.222972	3125.47	0.744159
Northern	Y2	Midwinter_I	Fum	54.0476	0.16323	1.54991	163.23	1549.91	9.49523	1275.14	0.3669	0.829405	0.462505	2.32979	4625.05	-25.6093	555.619	0.754949	Y2	Non-fum	54.0476	0.0548989	0.628656	54.8989	628.656	11.4512	286.958	0.3668	0.470858	0.103958	2.37574	1039.58	-24.9265	0.0570719	0.697877	9782.35	2.32913
Northern	Y2	Midwinter_II	Fum	54.2197	0.116566	0.995083	116.566	995.083	8.53663	2697.53	0.3669	1.34099	0.974085	4.56888	9740.85	-25.2236	495.732	1.13545	Y2	Non-fum	54.2197	0.0659676	0.898658	65.9676	898.658	13.6227	1229.13	0.3668	0.812769	0.445869	4.62382	4458.69	-26.4098	0.294129	0.841325	11793.1	2.80788
Northern	Y3	Early_Winter	Fum	44.7109	0.284121	2.13947	284.121	2139.47	7.53014	2109.72	0.3669	1.13021	0.763313	5.62291	7633.13	-26.7508	1610.42	2.16873	Y3	Non-fum	44.7109	0.0355566	0.43325	35.5566	433.25	12.1848	7040.64	0.3668	2.87088	2.50398	5.58973	25039.8	-26.6179	0.890332	1.2784	38349.1	9.13073
Northern	Y3	Late_Winter_C	Fum	74.4481	0.213985	1.00001	213.985	1000.01	4.67327	4665.17	0.3669	2.04003	1.67313	2.59096	16731.3	-27.0893	541.616	3.58024	Y3	Non-fum	74.4481	0.0627935	0.433181	62.7935	433.181	6.8985	2198.43	0.3668	1.16208	0.79518	2.62163	7951.8		0.499321	3.08092	92420.6	22.0049
Northern	Y3	Midwinter_I	Fum	57.7778	0.443873	3.47859	443.873	3478.59	7.8369	4956.13	0.3669	2.14256	1.77566	2.11533	17756.6	-26.9692	822.734	7.88169	Y3	Non-fum	57.7778	0.202997	1.79885	202.997	1798.85	8.86145	4806.25	0.3668	2.08977	1.72287	2.11111	17228.7	-25.7504	3.49738	4.38431	131519	31.3141
Northern	Y3	Midwinter_II	Fum	62.9278		6.09586		6095.86			0.3669			3.68127		-26.6578	1079.2		Y3	Non-fum	62.9278	0.155892	1.40888	155.892	1408.88	9.03754	3673.14	0.3668	1.68884	1.32194	3.71464	13219.4	-27.0258	2.06079
Northern	Y4	Early_Winter	Fum	67.343	0.11542	1.07569	115.42	1075.69	9.31977	5173.21	0.3669	2.21892	1.85202	3.28203	18520.2	-25.0775	1135.45	2.1376	Y4	Non-fum	67.343	0.0221446	0.28267	22.1446	282.67	12.7647	1128.18	0.3668	0.776248	0.409348	3.28856	4093.48	-24.7442	0.0906483	2.04696	49449.5	11.7737
Northern	Y4	Late_Winter_C	Fum	25.7593	0.0485818	0.343864	48.5818	343.864	7.07804	2278.32	0.3669	1.19076	0.82386	7.52058	8238.6	-25.8081	3073.33	0.400246	Y4	Non-fum	25.7593	0.0393658	0.331099	39.3658	331.099	8.41084	1377.02	0.3668	0.866225	0.499325	7.5874	4993.25		0.196563	0.203683	4920.49	1.17154
Northern	Y4	Midwinter_I	Fum	69.6246	0.183921	1.8876	183.921	1887.6	10.2631	4073.83	0.3669	1.83099	1.46409	1.60382	14640.9	-25.0636	684.534	2.69276	Y4	Non-fum	69.6246	0.141215	1.53543	141.215	1535.43	10.8731	1532.8	0.3668	0.922468	0.555568	1.59775	5555.68	-26.1153	0.784543	1.90822	46097.9	10.9757
Northern	Y4	Midwinter_II	Fum	65.9429	0.0252809	0.212401	25.2809	212.401	8.40165	6217.75	0.3669	2.58467	2.21777	3.33079	22177.7	-20.6679	717.228	0.560671	Y4	Non-fum	65.9429	0.038629	0.429646	38.629	429.646	11.1224	1693.87	0.3668	0.980556	0.613656	3.3376	6136.56	-25.5375	0.237049	0.323622	7817.92	1.86141
Northern	Y5	Early_Winter	Fum	58.7512	0.0576477	0.543842	57.6477	543.842	9.43388	6875.27	0.3669	2.8135	2.4466	4.24863	24466	-24.9581	1998.44	1.41041	Y5	Non-fum	58.7512	0.0147243	0.187315	14.7243	187.315	12.7214	5181.2	0.3668	2.22173	1.85483	4.20738	18548.3	-24.2004	0.273111	1.1373	66473.5	15.827
Northern	Y5	Late_Winter_C	Fum	18.5617	0.0207413	0.18689	20.7413	186.89	9.01052	6115.43	0.3669	2.54896	2.18206	8.15198	21820.6	-25.1622	3863.09	0.452589	Y5	Non-fum	18.5617	0.0186442	0.197893	18.6442	197.893	10.6142	1734.83	0.3668	0.995319	0.628419	8.16012	6284.19		0.117164	0.335425	19605.1	4.66788
Northern	Y5	Midwinter_I	Fum	66.3594	0.101747	1.00506	101.747	1005.06	9.87801	7293.24	0.3669	2.95841	2.59151	1.75604	25915.1	-25.5756	1483.68	2.63679	Y5	Non-fum	66.3594	0.0466968	0.507906	46.6968	507.906	10.8767	5485.38	0.3668	2.32851	1.96161	1.73249	19616.1	-25.3793	0.916011	1.72078	100577	23.9469
Northern	Y5	Midwinter_II	Fum	58.927	0.15919	1.49326	159.19	1493.26	9.38033	4839.02	0.3669	2.10132	1.73442	4.14837	17344.2	-26.1269	2131.85	2.76103	Y5	Non-fum	58.927	0.0406516	0.615218	40.6516	615.218	15.1339	4763.2	0.3668	2.0746	1.7077	4.05801	17077	-26.7203	0.694208	2.06682	120803	28.7625
