# Supplementary material
Source: Research Square preprint supplement (doi:10.21203/rs.3.rs-9353987/v1)
Supplement: Supplementary file 7 [file 96b689563ffa3c7e37123695.xlsx]

## Sheet: Sheet1
	Site	Winter_stage	Mesocosm_x	PFT	Species	Stem_leaf	N_percentage	d15N	C_Percentage	d13C	AT%_x	AT%_y	15NAPE%	Mesocosm_y	G_dryweight_total_mesocosm	Total_g_N_mesocosm	g_15N_APE_total_mesocosm	mg_15NAPE_per_g_dryweight_biomass	g_15N_APE_pr_m2
6	Northern	Early_Winter		Deciduous	Vaccinum	Leaf	1.02888	47.5264	80.381	-31.5578	0.383594	0.363926	0.0196671	Y1	1.67	1.71823	0.000337927	0.202352	0.015019
7	Northern	Early_Winter		Deciduous	Vaccinum	Leaf	1.02888	47.5264	80.381	-31.5578	0.383594	0.363926	0.0196671	Y2	0.15	0.154332	3.03527e-05	0.202352	0.00134901
8	Northern	Early_Winter		Deciduous	Vaccinum	Leaf	1.02888	47.5264	80.381	-31.5578	0.383594	0.363926	0.0196671	Y3	0.42	0.432131	8.49877e-05	0.202352	0.00377723
9	Northern	Early_Winter		Deciduous	Vaccinum	Leaf	1.02888	47.5264	80.381	-31.5578	0.383594	0.363926	0.0196671	Y4	0.16	0.164621	3.23763e-05	0.202352	0.00143895
10	Northern	Early_Winter		Deciduous	Vaccinum	Leaf	1.02888	47.5264	80.381	-31.5578	0.383594	0.363926	0.0196671	Y5	0.09	0.0925994	1.82116e-05	0.202352	0.000809407
11	Northern	Early_Winter		Deciduous	Vaccinum	Leaf	1.02888	47.5264	80.381	-31.5578	0.383594	0.363926	0.0196671	T2	0.39	0.401264	7.89171e-05	0.202352	0.00350743
12	Northern	Early_Winter		Deciduous	Vaccinum	Leaf	1.02888	47.5264	80.381	-31.5578	0.383594	0.363926	0.0196671	T5	2.3	2.36643	0.000465409	0.202352	0.0206848
29	Northern	Midwinter_I		Deciduous	Vaccinum	Leaf	0.632373	43.2922	191.3	-31.2869	0.382049	0.363926	0.0181225	Y1	1.67	1.05606	0.000191386	0.114602	0.00850603
30	Northern	Midwinter_I		Deciduous	Vaccinum	Leaf	0.632373	43.2922	191.3	-31.2869	0.382049	0.363926	0.0181225	Y2	0.15	0.094856	1.71903e-05	0.114602	0.000764015
31	Northern	Midwinter_I		Deciduous	Vaccinum	Leaf	0.632373	43.2922	191.3	-31.2869	0.382049	0.363926	0.0181225	Y3	0.42	0.265597	4.81329e-05	0.114602	0.00213924
32	Northern	Midwinter_I		Deciduous	Vaccinum	Leaf	0.632373	43.2922	191.3	-31.2869	0.382049	0.363926	0.0181225	Y4	0.16	0.10118	1.83364e-05	0.114602	0.000814949
33	Northern	Midwinter_I		Deciduous	Vaccinum	Leaf	0.632373	43.2922	191.3	-31.2869	0.382049	0.363926	0.0181225	Y5	0.09	0.0569136	1.03142e-05	0.114602	0.000458409
34	Northern	Midwinter_I		Deciduous	Vaccinum	Leaf	0.632373	43.2922	191.3	-31.2869	0.382049	0.363926	0.0181225	T2	0.39	0.246626	4.46949e-05	0.114602	0.00198644
35	Northern	Midwinter_I		Deciduous	Vaccinum	Leaf	0.632373	43.2922	191.3	-31.2869	0.382049	0.363926	0.0181225	T5	2.3	1.45446	0.000263585	0.114602	0.0117149
52	Northern	Midwinter_II		Deciduous	Vaccinum	Leaf	0.9461	42.606	79.822	-30.8889	0.381799	0.363926	0.0178722	Y1	1.67	1.57999	0.000282378	0.169089	0.0125502
53	Northern	Midwinter_II		Deciduous	Vaccinum	Leaf	0.9461	42.606	79.822	-30.8889	0.381799	0.363926	0.0178722	Y2	0.15	0.141915	2.53633e-05	0.169089	0.00112726
54	Northern	Midwinter_II		Deciduous	Vaccinum	Leaf	0.9461	42.606	79.822	-30.8889	0.381799	0.363926	0.0178722	Y3	0.42	0.397362	7.10173e-05	0.169089	0.00315633
55	Northern	Midwinter_II		Deciduous	Vaccinum	Leaf	0.9461	42.606	79.822	-30.8889	0.381799	0.363926	0.0178722	Y4	0.16	0.151376	2.70542e-05	0.169089	0.00120241
56	Northern	Midwinter_II		Deciduous	Vaccinum	Leaf	0.9461	42.606	79.822	-30.8889	0.381799	0.363926	0.0178722	Y5	0.09	0.085149	1.5218e-05	0.169089	0.000676356
57	Northern	Midwinter_II		Deciduous	Vaccinum	Leaf	0.9461	42.606	79.822	-30.8889	0.381799	0.363926	0.0178722	T2	0.39	0.368979	6.59447e-05	0.169089	0.00293087
58	Northern	Midwinter_II		Deciduous	Vaccinum	Leaf	0.9461	42.606	79.822	-30.8889	0.381799	0.363926	0.0178722	T5	2.3	2.17603	0.000388905	0.169089	0.0172846
75	Northern	Late_Winter_C		Deciduous	Vaccinum	Leaf	1.04921	39.5532	74.532	-30.1595	0.380685	0.363926	0.0167585	Y1	1.67	1.75218	0.00029364	0.175832	0.0130507
76	Northern	Late_Winter_C		Deciduous	Vaccinum	Leaf	1.04921	39.5532	74.532	-30.1595	0.380685	0.363926	0.0167585	Y2	0.15	0.157381	2.63748e-05	0.175832	0.00117221
77	Northern	Late_Winter_C		Deciduous	Vaccinum	Leaf	1.04921	39.5532	74.532	-30.1595	0.380685	0.363926	0.0167585	Y3	0.42	0.440668	7.38495e-05	0.175832	0.0032822
78	Northern	Late_Winter_C		Deciduous	Vaccinum	Leaf	1.04921	39.5532	74.532	-30.1595	0.380685	0.363926	0.0167585	Y4	0.16	0.167873	2.81332e-05	0.175832	0.00125036
79	Northern	Late_Winter_C		Deciduous	Vaccinum	Leaf	1.04921	39.5532	74.532	-30.1595	0.380685	0.363926	0.0167585	Y5	0.09	0.0944288	1.58249e-05	0.175832	0.000703329
80	Northern	Late_Winter_C		Deciduous	Vaccinum	Leaf	1.04921	39.5532	74.532	-30.1595	0.380685	0.363926	0.0167585	T2	0.39	0.409192	6.85746e-05	0.175832	0.00304776
81	Northern	Late_Winter_C		Deciduous	Vaccinum	Leaf	1.04921	39.5532	74.532	-30.1595	0.380685	0.363926	0.0167585	T5	2.3	2.41318	0.000404414	0.175832	0.017974
98	Northern	Late_Winter_WW		Deciduous	Vaccinum	Leaf	0.546981	38.3256	225.438	-31.1945	0.380237	0.363926	0.0163107	Y1	1.67	0.913458	0.000148992	0.0892165	0.00662185
99	Northern	Late_Winter_WW		Deciduous	Vaccinum	Leaf	0.546981	38.3256	225.438	-31.1945	0.380237	0.363926	0.0163107	Y2	0.15	0.0820472	1.33825e-05	0.0892165	0.000594777
100	Northern	Late_Winter_WW		Deciduous	Vaccinum	Leaf	0.546981	38.3256	225.438	-31.1945	0.380237	0.363926	0.0163107	Y3	0.42	0.229732	3.74709e-05	0.0892165	0.00166537
101	Northern	Late_Winter_WW		Deciduous	Vaccinum	Leaf	0.546981	38.3256	225.438	-31.1945	0.380237	0.363926	0.0163107	Y4	0.16	0.087517	1.42746e-05	0.0892165	0.000634429
102	Northern	Late_Winter_WW		Deciduous	Vaccinum	Leaf	0.546981	38.3256	225.438	-31.1945	0.380237	0.363926	0.0163107	Y5	0.09	0.0492283	8.02949e-06	0.0892165	0.000356866
103	Northern	Late_Winter_WW		Deciduous	Vaccinum	Leaf	0.546981	38.3256	225.438	-31.1945	0.380237	0.363926	0.0163107	T2	0.39	0.213323	3.47944e-05	0.0892165	0.00154642
104	Northern	Late_Winter_WW		Deciduous	Vaccinum	Leaf	0.546981	38.3256	225.438	-31.1945	0.380237	0.363926	0.0163107	T5	2.3	1.25806	0.000205198	0.0892165	0.00911991
121	Northern	Early_Winter		Deciduous	Vaccinum	Stem	1.18676	48.059	34.269	-30.1608	0.383788	0.363926	0.0198614	Y1	14.37	17.0537	0.00338711	0.235707	0.150538
122	Northern	Early_Winter		Deciduous	Vaccinum	Stem	1.18676	48.059	34.269	-30.1608	0.383788	0.363926	0.0198614	Y2	1.29	1.53092	0.000304062	0.235707	0.0135139
123	Northern	Early_Winter		Deciduous	Vaccinum	Stem	1.18676	48.059	34.269	-30.1608	0.383788	0.363926	0.0198614	Y3	3.23	3.83323	0.000761333	0.235707	0.033837
124	Northern	Early_Winter		Deciduous	Vaccinum	Stem	1.18676	48.059	34.269	-30.1608	0.383788	0.363926	0.0198614	Y4	2.26	2.68207	0.000532698	0.235707	0.0236755
125	Northern	Early_Winter		Deciduous	Vaccinum	Stem	1.18676	48.059	34.269	-30.1608	0.383788	0.363926	0.0198614	Y5	0.3	0.356027	7.07121e-05	0.235707	0.00314276
126	Northern	Early_Winter		Deciduous	Vaccinum	Stem	1.18676	48.059	34.269	-30.1608	0.383788	0.363926	0.0198614	T2	2.61	3.09744	0.000615195	0.235707	0.027342
127	Northern	Early_Winter		Deciduous	Vaccinum	Stem	1.18676	48.059	34.269	-30.1608	0.383788	0.363926	0.0198614	T5	9.93	11.7845	0.00234057	0.235707	0.104025
144	Northern	Midwinter_I		Deciduous	Vaccinum	Stem	1.15726	50.2748	326.24	-29.6879	0.384596	0.363926	0.0206697	Y1	14.37	16.6298	0.00343733	0.239202	0.15277
145	Northern	Midwinter_I		Deciduous	Vaccinum	Stem	1.15726	50.2748	326.24	-29.6879	0.384596	0.363926	0.0206697	Y2	1.29	1.49286	0.00030857	0.239202	0.0137142
146	Northern	Midwinter_I		Deciduous	Vaccinum	Stem	1.15726	50.2748	326.24	-29.6879	0.384596	0.363926	0.0206697	Y3	3.23	3.73794	0.000772622	0.239202	0.0343387
147	Northern	Midwinter_I		Deciduous	Vaccinum	Stem	1.15726	50.2748	326.24	-29.6879	0.384596	0.363926	0.0206697	Y4	2.26	2.6154	0.000540596	0.239202	0.0240265
148	Northern	Midwinter_I		Deciduous	Vaccinum	Stem	1.15726	50.2748	326.24	-29.6879	0.384596	0.363926	0.0206697	Y5	0.3	0.347177	7.17605e-05	0.239202	0.00318936
149	Northern	Midwinter_I		Deciduous	Vaccinum	Stem	1.15726	50.2748	326.24	-29.6879	0.384596	0.363926	0.0206697	T2	2.61	3.02044	0.000624317	0.239202	0.0277474
150	Northern	Midwinter_I		Deciduous	Vaccinum	Stem	1.15726	50.2748	326.24	-29.6879	0.384596	0.363926	0.0206697	T5	9.93	11.4916	0.00237527	0.239202	0.105568
167	Northern	Midwinter_II		Deciduous	Vaccinum	Stem	1.19969	52.4718	45.934	-31.1039	0.385398	0.363926	0.0214711	Y1	14.37	17.2395	0.00370152	0.257587	0.164512
168	Northern	Midwinter_II		Deciduous	Vaccinum	Stem	1.19969	52.4718	45.934	-31.1039	0.385398	0.363926	0.0214711	Y2	1.29	1.5476	0.000332287	0.257587	0.0147683
169	Northern	Midwinter_II		Deciduous	Vaccinum	Stem	1.19969	52.4718	45.934	-31.1039	0.385398	0.363926	0.0214711	Y3	3.23	3.875	0.000832005	0.257587	0.036978
170	Northern	Midwinter_II		Deciduous	Vaccinum	Stem	1.19969	52.4718	45.934	-31.1039	0.385398	0.363926	0.0214711	Y4	2.26	2.7113	0.000582146	0.257587	0.0258732
171	Northern	Midwinter_II		Deciduous	Vaccinum	Stem	1.19969	52.4718	45.934	-31.1039	0.385398	0.363926	0.0214711	Y5	0.3	0.359907	7.7276e-05	0.257587	0.00343449
172	Northern	Midwinter_II		Deciduous	Vaccinum	Stem	1.19969	52.4718	45.934	-31.1039	0.385398	0.363926	0.0214711	T2	2.61	3.13119	0.000672302	0.257587	0.0298801
173	Northern	Midwinter_II		Deciduous	Vaccinum	Stem	1.19969	52.4718	45.934	-31.1039	0.385398	0.363926	0.0214711	T5	9.93	11.9129	0.00255784	0.257587	0.113682
190	Northern	Late_Winter_C		Deciduous	Vaccinum	Stem	1.20237	53.1005	87.792	-29.1475	0.385627	0.363926	0.0217004	Y1	14.37	17.2781	0.00374942	0.26092	0.166641
191	Northern	Late_Winter_C		Deciduous	Vaccinum	Stem	1.20237	53.1005	87.792	-29.1475	0.385627	0.363926	0.0217004	Y2	1.29	1.55106	0.000336587	0.26092	0.0149594
192	Northern	Late_Winter_C		Deciduous	Vaccinum	Stem	1.20237	53.1005	87.792	-29.1475	0.385627	0.363926	0.0217004	Y3	3.23	3.88366	0.000842771	0.26092	0.0374565
193	Northern	Late_Winter_C		Deciduous	Vaccinum	Stem	1.20237	53.1005	87.792	-29.1475	0.385627	0.363926	0.0217004	Y4	2.26	2.71736	0.000589679	0.26092	0.026208
194	Northern	Late_Winter_C		Deciduous	Vaccinum	Stem	1.20237	53.1005	87.792	-29.1475	0.385627	0.363926	0.0217004	Y5	0.3	0.360712	7.8276e-05	0.26092	0.00347893
195	Northern	Late_Winter_C		Deciduous	Vaccinum	Stem	1.20237	53.1005	87.792	-29.1475	0.385627	0.363926	0.0217004	T2	2.61	3.13819	0.000681001	0.26092	0.0302667
196	Northern	Late_Winter_C		Deciduous	Vaccinum	Stem	1.20237	53.1005	87.792	-29.1475	0.385627	0.363926	0.0217004	T5	9.93	11.9396	0.00259093	0.26092	0.115153
213	Northern	Late_Winter_WW		Deciduous	Vaccinum	Stem	1.29415	56.9381	131.216	-30.5865	0.387027	0.363926	0.0231003	Y1	14.37	18.5969	0.00429593	0.298951	0.19093
214	Northern	Late_Winter_WW		Deciduous	Vaccinum	Stem	1.29415	56.9381	131.216	-30.5865	0.387027	0.363926	0.0231003	Y2	1.29	1.66945	0.000385647	0.298951	0.0171399
215	Northern	Late_Winter_WW		Deciduous	Vaccinum	Stem	1.29415	56.9381	131.216	-30.5865	0.387027	0.363926	0.0231003	Y3	3.23	4.18009	0.000965612	0.298951	0.0429161
216	Northern	Late_Winter_WW		Deciduous	Vaccinum	Stem	1.29415	56.9381	131.216	-30.5865	0.387027	0.363926	0.0231003	Y4	2.26	2.92477	0.000675629	0.298951	0.030028
217	Northern	Late_Winter_WW		Deciduous	Vaccinum	Stem	1.29415	56.9381	131.216	-30.5865	0.387027	0.363926	0.0231003	Y5	0.3	0.388244	8.96853e-05	0.298951	0.00398601
218	Northern	Late_Winter_WW		Deciduous	Vaccinum	Stem	1.29415	56.9381	131.216	-30.5865	0.387027	0.363926	0.0231003	T2	2.61	3.37772	0.000780262	0.298951	0.0346783
219	Northern	Late_Winter_WW		Deciduous	Vaccinum	Stem	1.29415	56.9381	131.216	-30.5865	0.387027	0.363926	0.0231003	T5	9.93	12.8509	0.00296858	0.298951	0.131937
232	Northern	Early_Winter		Deciduous	Grass	Leaf	1.27791	42.9968	945.11	-29.2978	0.381941	0.366373	0.0155686	Y1	0.045	0.0575057	8.95283e-06	0.198952	0.000397903
233	Northern	Early_Winter		Deciduous	Grass	Leaf	1.27791	42.9968	945.11	-29.2978	0.381941	0.366373	0.0155686	Y2	1.86	2.3769	0.00037005	0.198952	0.0164467
234	Northern	Early_Winter		Deciduous	Grass	Leaf	1.27791	42.9968	945.11	-29.2978	0.381941	0.366373	0.0155686	Y3	1.38	1.76351	0.000274553	0.198952	0.0122024
235	Northern	Early_Winter		Deciduous	Grass	Leaf	1.27791	42.9968	945.11	-29.2978	0.381941	0.366373	0.0155686	Y4	0.2	0.255581	3.97903e-05	0.198952	0.00176846
253	Northern	Midwinter_I		Deciduous	Grass	Leaf	1.22169	38.6629	2479.87	-30.1729	0.38036	0.366373	0.0139876	Y1	0.045	0.0549762	7.68984e-06	0.170885	0.000341771
254	Northern	Midwinter_I		Deciduous	Grass	Leaf	1.22169	38.6629	2479.87	-30.1729	0.38036	0.366373	0.0139876	Y2	1.86	2.27235	0.000317847	0.170885	0.0141265
255	Northern	Midwinter_I		Deciduous	Grass	Leaf	1.22169	38.6629	2479.87	-30.1729	0.38036	0.366373	0.0139876	Y3	1.38	1.68594	0.000235822	0.170885	0.010481
256	Northern	Midwinter_I		Deciduous	Grass	Leaf	1.22169	38.6629	2479.87	-30.1729	0.38036	0.366373	0.0139876	Y4	0.2	0.244339	3.41771e-05	0.170885	0.00151898
274	Northern	Midwinter_II		Deciduous	Grass	Leaf	0.712134	38.7766	6705.17	-27.1489	0.380402	0.366373	0.014029	Y1	0.045	0.032046	4.49575e-06	0.0999055	0.000199811
275	Northern	Midwinter_II		Deciduous	Grass	Leaf	0.712134	38.7766	6705.17	-27.1489	0.380402	0.366373	0.014029	Y2	1.86	1.32457	0.000185824	0.0999055	0.00825886
276	Northern	Midwinter_II		Deciduous	Grass	Leaf	0.712134	38.7766	6705.17	-27.1489	0.380402	0.366373	0.014029	Y3	1.38	0.982745	0.00013787	0.0999055	0.00612754
277	Northern	Midwinter_II		Deciduous	Grass	Leaf	0.712134	38.7766	6705.17	-27.1489	0.380402	0.366373	0.014029	Y4	0.2	0.142427	1.99811e-05	0.0999055	0.000888049
295	Northern	Late_Winter_C		Deciduous	Grass	Leaf	2.14297	43.2672	1386.33	-28.4565	0.38204	0.366373	0.0156672	Y1	0.045	0.0964335	1.51085e-05	0.335744	0.000671487
296	Northern	Late_Winter_C		Deciduous	Grass	Leaf	2.14297	43.2672	1386.33	-28.4565	0.38204	0.366373	0.0156672	Y2	1.86	3.98592	0.000624483	0.335744	0.0277548
297	Northern	Late_Winter_C		Deciduous	Grass	Leaf	2.14297	43.2672	1386.33	-28.4565	0.38204	0.366373	0.0156672	Y3	1.38	2.95729	0.000463326	0.335744	0.0205923
298	Northern	Late_Winter_C		Deciduous	Grass	Leaf	2.14297	43.2672	1386.33	-28.4565	0.38204	0.366373	0.0156672	Y4	0.2	0.428593	6.71487e-05	0.335744	0.00298439
316	Northern	Late_Winter_WW		Deciduous	Grass	Leaf						0.366373		Y1	0.045
317	Northern	Late_Winter_WW		Deciduous	Grass	Leaf						0.366373		Y2	1.86
318	Northern	Late_Winter_WW		Deciduous	Grass	Leaf						0.366373		Y3	1.38
319	Northern	Late_Winter_WW		Deciduous	Grass	Leaf						0.366373		Y4	0.2
341	Northern	Early_Winter		Evergreen	Cassiope	Leaf	1.27752	53.775	200.15	-27.5348	0.385873	0.363407	0.0224659	Y4	6.6	8.43162	0.00189424	0.287006	0.0841886
342	Northern	Early_Winter		Evergreen	Cassiope	Leaf	1.27752	53.775	200.15	-27.5348	0.385873	0.363407	0.0224659	Y5	1.6	2.04403	0.00045921	0.287006	0.0204093
343	Northern	Early_Winter		Evergreen	Cassiope	Leaf	1.27752	53.775	200.15	-27.5348	0.385873	0.363407	0.0224659	T1	9.4	12.0087	0.00269786	0.287006	0.119905
344	Northern	Early_Winter		Evergreen	Cassiope	Leaf	1.27752	53.775	200.15	-27.5348	0.385873	0.363407	0.0224659	T2	0.18	0.229953	5.16612e-05	0.287006	0.00229605
345	Northern	Early_Winter		Evergreen	Cassiope	Leaf	1.27752	53.775	200.15	-27.5348	0.385873	0.363407	0.0224659	T3	1.8	2.29953	0.000516612	0.287006	0.0229605
346	Northern	Early_Winter		Evergreen	Cassiope	Leaf	1.27752	53.775	200.15	-27.5348	0.385873	0.363407	0.0224659	T4	4.68	5.97879	0.00134319	0.287006	0.0596973
347	Northern	Early_Winter		Evergreen	Cassiope	Leaf	1.27752	53.775	200.15	-27.5348	0.385873	0.363407	0.0224659	T5	0.13	0.166077	3.73108e-05	0.287006	0.00165826
354	Northern	Midwinter_I		Evergreen	Cassiope	Leaf	1.15794	52.274	32.116	-27.5459	0.385325	0.363407	0.0219184	Y4	6.6	7.64243	0.0016751	0.253803	0.0744489
355	Northern	Midwinter_I		Evergreen	Cassiope	Leaf	1.15794	52.274	32.116	-27.5459	0.385325	0.363407	0.0219184	Y5	1.6	1.85271	0.000406085	0.253803	0.0180482
356	Northern	Midwinter_I		Evergreen	Cassiope	Leaf	1.15794	52.274	32.116	-27.5459	0.385325	0.363407	0.0219184	T1	9.4	10.8847	0.00238575	0.253803	0.106033
357	Northern	Midwinter_I		Evergreen	Cassiope	Leaf	1.15794	52.274	32.116	-27.5459	0.385325	0.363407	0.0219184	T2	0.18	0.20843	4.56845e-05	0.253803	0.00203042
358	Northern	Midwinter_I		Evergreen	Cassiope	Leaf	1.15794	52.274	32.116	-27.5459	0.385325	0.363407	0.0219184	T3	1.8	2.0843	0.000456845	0.253803	0.0203042
359	Northern	Midwinter_I		Evergreen	Cassiope	Leaf	1.15794	52.274	32.116	-27.5459	0.385325	0.363407	0.0219184	T4	4.68	5.41918	0.0011878	0.253803	0.052791
360	Northern	Midwinter_I		Evergreen	Cassiope	Leaf	1.15794	52.274	32.116	-27.5459	0.385325	0.363407	0.0219184	T5	0.13	0.150533	3.29944e-05	0.253803	0.00146642
367	Northern	Midwinter_II		Evergreen	Cassiope	Leaf	1.07017	48.9128	87.939	-28.6259	0.384099	0.363407	0.0206923	Y4	6.6	7.06315	0.00146153	0.221444	0.0649569
368	Northern	Midwinter_II		Evergreen	Cassiope	Leaf	1.07017	48.9128	87.939	-28.6259	0.384099	0.363407	0.0206923	Y5	1.6	1.71228	0.00035431	0.221444	0.0157471
369	Northern	Midwinter_II		Evergreen	Cassiope	Leaf	1.07017	48.9128	87.939	-28.6259	0.384099	0.363407	0.0206923	T1	9.4	10.0596	0.00208157	0.221444	0.0925143
370	Northern	Midwinter_II		Evergreen	Cassiope	Leaf	1.07017	48.9128	87.939	-28.6259	0.384099	0.363407	0.0206923	T2	0.18	0.192631	3.98599e-05	0.221444	0.00177155
371	Northern	Midwinter_II		Evergreen	Cassiope	Leaf	1.07017	48.9128	87.939	-28.6259	0.384099	0.363407	0.0206923	T3	1.8	1.92631	0.000398599	0.221444	0.0177155
372	Northern	Midwinter_II		Evergreen	Cassiope	Leaf	1.07017	48.9128	87.939	-28.6259	0.384099	0.363407	0.0206923	T4	4.68	5.00842	0.00103636	0.221444	0.0460603
373	Northern	Midwinter_II		Evergreen	Cassiope	Leaf	1.07017	48.9128	87.939	-28.6259	0.384099	0.363407	0.0206923	T5	0.13	0.139123	2.87877e-05	0.221444	0.00127945
380	Northern	Late_Winter_C		Evergreen	Cassiope	Leaf	1.11619	53.451	89.2257	-29.172	0.385755	0.363407	0.0223478	Y4	6.6	7.36682	0.00164632	0.249442	0.0731697
381	Northern	Late_Winter_C		Evergreen	Cassiope	Leaf	1.11619	53.451	89.2257	-29.172	0.385755	0.363407	0.0223478	Y5	1.6	1.7859	0.000399108	0.249442	0.0177381
382	Northern	Late_Winter_C		Evergreen	Cassiope	Leaf	1.11619	53.451	89.2257	-29.172	0.385755	0.363407	0.0223478	T1	9.4	10.4921	0.00234476	0.249442	0.104211
383	Northern	Late_Winter_C		Evergreen	Cassiope	Leaf	1.11619	53.451	89.2257	-29.172	0.385755	0.363407	0.0223478	T2	0.18	0.200913	4.48996e-05	0.249442	0.00199554
384	Northern	Late_Winter_C		Evergreen	Cassiope	Leaf	1.11619	53.451	89.2257	-29.172	0.385755	0.363407	0.0223478	T3	1.8	2.00913	0.000448996	0.249442	0.0199554
385	Northern	Late_Winter_C		Evergreen	Cassiope	Leaf	1.11619	53.451	89.2257	-29.172	0.385755	0.363407	0.0223478	T4	4.68	5.22375	0.00116739	0.249442	0.051884
386	Northern	Late_Winter_C		Evergreen	Cassiope	Leaf	1.11619	53.451	89.2257	-29.172	0.385755	0.363407	0.0223478	T5	0.13	0.145104	3.24275e-05	0.249442	0.00144122
393	Northern	Late_Winter_WW		Evergreen	Cassiope	Leaf	0.974776	51.1675	1427.61	-27.7815	0.384922	0.363407	0.0215148	Y4	6.6	6.43352	0.00138416	0.209721	0.0615182
394	Northern	Late_Winter_WW		Evergreen	Cassiope	Leaf	0.974776	51.1675	1427.61	-27.7815	0.384922	0.363407	0.0215148	Y5	1.6	1.55964	0.000335554	0.209721	0.0149135
395	Northern	Late_Winter_WW		Evergreen	Cassiope	Leaf	0.974776	51.1675	1427.61	-27.7815	0.384922	0.363407	0.0215148	T1	9.4	9.1629	0.00197138	0.209721	0.0876168
396	Northern	Late_Winter_WW		Evergreen	Cassiope	Leaf	0.974776	51.1675	1427.61	-27.7815	0.384922	0.363407	0.0215148	T2	0.18	0.17546	3.77498e-05	0.209721	0.00167777
397	Northern	Late_Winter_WW		Evergreen	Cassiope	Leaf	0.974776	51.1675	1427.61	-27.7815	0.384922	0.363407	0.0215148	T3	1.8	1.7546	0.000377498	0.209721	0.0167777
398	Northern	Late_Winter_WW		Evergreen	Cassiope	Leaf	0.974776	51.1675	1427.61	-27.7815	0.384922	0.363407	0.0215148	T4	4.68	4.56195	0.000981495	0.209721	0.043622
399	Northern	Late_Winter_WW		Evergreen	Cassiope	Leaf	0.974776	51.1675	1427.61	-27.7815	0.384922	0.363407	0.0215148	T5	0.13	0.126721	2.72638e-05	0.209721	0.00121172
406	Northern	Early_Winter		Evergreen	Cassiope	Stem	0.970381	51.0884	126.886	-27.8948	0.384893	0.363407	0.0214859	Y4	13.59	13.1875	0.00283345	0.208495	0.125931
407	Northern	Early_Winter		Evergreen	Cassiope	Stem	0.970381	51.0884	126.886	-27.8948	0.384893	0.363407	0.0214859	Y5	4.83	4.68694	0.00100703	0.208495	0.044757
408	Northern	Early_Winter		Evergreen	Cassiope	Stem	0.970381	51.0884	126.886	-27.8948	0.384893	0.363407	0.0214859	T1	7.2	6.98674	0.00150117	0.208495	0.0667185
409	Northern	Early_Winter		Evergreen	Cassiope	Stem	0.970381	51.0884	126.886	-27.8948	0.384893	0.363407	0.0214859	T2	0.45	0.436671	9.38229e-05	0.208495	0.00416991
410	Northern	Early_Winter		Evergreen	Cassiope	Stem	0.970381	51.0884	126.886	-27.8948	0.384893	0.363407	0.0214859	T3	2.08	2.01839	0.00043367	0.208495	0.0192742
411	Northern	Early_Winter		Evergreen	Cassiope	Stem	0.970381	51.0884	126.886	-27.8948	0.384893	0.363407	0.0214859	T4	6.6	6.40451	0.00137607	0.208495	0.0611586
412	Northern	Early_Winter		Evergreen	Cassiope	Stem	0.970381	51.0884	126.886	-27.8948	0.384893	0.363407	0.0214859	T5	0.94	0.912158	0.000195986	0.208495	0.00871047
419	Northern	Midwinter_I		Evergreen	Cassiope	Stem	1.0746	51.7044	26.332	-27.5299	0.385118	0.363407	0.0217107	Y4	13.59	14.6039	0.0031706	0.233304	0.140915
420	Northern	Midwinter_I		Evergreen	Cassiope	Stem	1.0746	51.7044	26.332	-27.5299	0.385118	0.363407	0.0217107	Y5	4.83	5.19034	0.00112686	0.233304	0.0500825
421	Northern	Midwinter_I		Evergreen	Cassiope	Stem	1.0746	51.7044	26.332	-27.5299	0.385118	0.363407	0.0217107	T1	7.2	7.73715	0.00167979	0.233304	0.0746572
422	Northern	Midwinter_I		Evergreen	Cassiope	Stem	1.0746	51.7044	26.332	-27.5299	0.385118	0.363407	0.0217107	T2	0.45	0.483572	0.000104987	0.233304	0.00466607
423	Northern	Midwinter_I		Evergreen	Cassiope	Stem	1.0746	51.7044	26.332	-27.5299	0.385118	0.363407	0.0217107	T3	2.08	2.23518	0.000485272	0.233304	0.0215676
424	Northern	Midwinter_I		Evergreen	Cassiope	Stem	1.0746	51.7044	26.332	-27.5299	0.385118	0.363407	0.0217107	T4	6.6	7.09239	0.0015398	0.233304	0.0684358
425	Northern	Midwinter_I		Evergreen	Cassiope	Stem	1.0746	51.7044	26.332	-27.5299	0.385118	0.363407	0.0217107	T5	0.94	1.01013	0.000219306	0.233304	0.00974691
432	Northern	Midwinter_II		Evergreen	Cassiope	Stem	0.928632	50.8819	40.953	-28.2469	0.384818	0.363407	0.0214106	Y4	13.59	12.6201	0.00270204	0.198826	0.120091
433	Northern	Midwinter_II		Evergreen	Cassiope	Stem	0.928632	50.8819	40.953	-28.2469	0.384818	0.363407	0.0214106	Y5	4.83	4.48529	0.000960328	0.198826	0.0426812
434	Northern	Midwinter_II		Evergreen	Cassiope	Stem	0.928632	50.8819	40.953	-28.2469	0.384818	0.363407	0.0214106	T1	7.2	6.68615	0.00143154	0.198826	0.0636242
435	Northern	Midwinter_II		Evergreen	Cassiope	Stem	0.928632	50.8819	40.953	-28.2469	0.384818	0.363407	0.0214106	T2	0.45	0.417884	8.94715e-05	0.198826	0.00397651
436	Northern	Midwinter_II		Evergreen	Cassiope	Stem	0.928632	50.8819	40.953	-28.2469	0.384818	0.363407	0.0214106	T3	2.08	1.93155	0.000413557	0.198826	0.0183803
437	Northern	Midwinter_II		Evergreen	Cassiope	Stem	0.928632	50.8819	40.953	-28.2469	0.384818	0.363407	0.0214106	T4	6.6	6.12897	0.00131225	0.198826	0.0583222
438	Northern	Midwinter_II		Evergreen	Cassiope	Stem	0.928632	50.8819	40.953	-28.2469	0.384818	0.363407	0.0214106	T5	0.94	0.872914	0.000186896	0.198826	0.00830649
445	Northern	Late_Winter_C		Evergreen	Cassiope	Stem	0.910608	50.1383	72.1107	-29.241	0.384546	0.363407	0.0211394	Y4	13.59	12.3752	0.00261603	0.192497	0.116268
446	Northern	Late_Winter_C		Evergreen	Cassiope	Stem	0.910608	50.1383	72.1107	-29.241	0.384546	0.363407	0.0211394	Y5	4.83	4.39824	0.000929759	0.192497	0.0413226
447	Northern	Late_Winter_C		Evergreen	Cassiope	Stem	0.910608	50.1383	72.1107	-29.241	0.384546	0.363407	0.0211394	T1	7.2	6.55638	0.00138598	0.192497	0.061599
448	Northern	Late_Winter_C		Evergreen	Cassiope	Stem	0.910608	50.1383	72.1107	-29.241	0.384546	0.363407	0.0211394	T2	0.45	0.409774	8.66235e-05	0.192497	0.00384993
449	Northern	Late_Winter_C		Evergreen	Cassiope	Stem	0.910608	50.1383	72.1107	-29.241	0.384546	0.363407	0.0211394	T3	2.08	1.89407	0.000400393	0.192497	0.0177953
450	Northern	Late_Winter_C		Evergreen	Cassiope	Stem	0.910608	50.1383	72.1107	-29.241	0.384546	0.363407	0.0211394	T4	6.6	6.01001	0.00127048	0.192497	0.0564657
451	Northern	Late_Winter_C		Evergreen	Cassiope	Stem	0.910608	50.1383	72.1107	-29.241	0.384546	0.363407	0.0211394	T5	0.94	0.855972	0.000180947	0.192497	0.00804209
458	Northern	Late_Winter_WW		Evergreen	Cassiope	Stem	0.860744	49.5052	1235.6	-28.0555	0.384315	0.363407	0.0209084	Y4	13.59	11.6975	0.00244577	0.179968	0.108701
459	Northern	Late_Winter_WW		Evergreen	Cassiope	Stem	0.860744	49.5052	1235.6	-28.0555	0.384315	0.363407	0.0209084	Y5	4.83	4.15739	0.000869246	0.179968	0.0386332
460	Northern	Late_Winter_WW		Evergreen	Cassiope	Stem	0.860744	49.5052	1235.6	-28.0555	0.384315	0.363407	0.0209084	T1	7.2	6.19736	0.00129577	0.179968	0.0575898
461	Northern	Late_Winter_WW		Evergreen	Cassiope	Stem	0.860744	49.5052	1235.6	-28.0555	0.384315	0.363407	0.0209084	T2	0.45	0.387335	8.09857e-05	0.179968	0.00359936
462	Northern	Late_Winter_WW		Evergreen	Cassiope	Stem	0.860744	49.5052	1235.6	-28.0555	0.384315	0.363407	0.0209084	T3	2.08	1.79035	0.000374334	0.179968	0.0166371
463	Northern	Late_Winter_WW		Evergreen	Cassiope	Stem	0.860744	49.5052	1235.6	-28.0555	0.384315	0.363407	0.0209084	T4	6.6	5.68091	0.00118779	0.179968	0.0527907
464	Northern	Late_Winter_WW		Evergreen	Cassiope	Stem	0.860744	49.5052	1235.6	-28.0555	0.384315	0.363407	0.0209084	T5	0.94	0.8091	0.00016917	0.179968	0.00751867
523	Northern	Early_Winter		Deciduous	Pileurt	Leaf	1.57119	45.349	66.364	-30.7578	0.382799	0.3653	0.0174994	Y1	0.015	0.0235678	4.12424e-06	0.274949	0.0001833
524	Northern	Early_Winter		Deciduous	Pileurt	Leaf	1.57119	45.349	66.364	-30.7578	0.382799	0.3653	0.0174994	Y2	0.3	0.471357	8.24848e-05	0.274949	0.00366599
525	Northern	Early_Winter		Deciduous	Pileurt	Leaf	1.57119	45.349	66.364	-30.7578	0.382799	0.3653	0.0174994	Y3	0.18	0.282814	4.94909e-05	0.274949	0.00219959
526	Northern	Early_Winter		Deciduous	Pileurt	Leaf	1.57119	45.349	66.364	-30.7578	0.382799	0.3653	0.0174994	T1	0.07	0.109983	1.92465e-05	0.274949	0.000855398
527	Northern	Early_Winter		Deciduous	Pileurt	Leaf	1.57119	45.349	66.364	-30.7578	0.382799	0.3653	0.0174994	T2	0.016	0.025139	4.39919e-06	0.274949	0.00019552
528	Northern	Early_Winter		Deciduous	Pileurt	Leaf	1.57119	45.349	66.364	-30.7578	0.382799	0.3653	0.0174994	T4	0.09	0.141407	2.47454e-05	0.274949	0.0010998
531	Northern	Midwinter_I		Deciduous	Pileurt	Leaf	1.57949	46.3608	135.064	-29.9339	0.383168	0.3653	0.0178685	Y1	0.015	0.0236924	4.23348e-06	0.282232	0.000188155
532	Northern	Midwinter_I		Deciduous	Pileurt	Leaf	1.57949	46.3608	135.064	-29.9339	0.383168	0.3653	0.0178685	Y2	0.3	0.473847	8.46696e-05	0.282232	0.0037631
533	Northern	Midwinter_I		Deciduous	Pileurt	Leaf	1.57949	46.3608	135.064	-29.9339	0.383168	0.3653	0.0178685	Y3	0.18	0.284308	5.08018e-05	0.282232	0.00225786
534	Northern	Midwinter_I		Deciduous	Pileurt	Leaf	1.57949	46.3608	135.064	-29.9339	0.383168	0.3653	0.0178685	T1	0.07	0.110564	1.97562e-05	0.282232	0.000878056
535	Northern	Midwinter_I		Deciduous	Pileurt	Leaf	1.57949	46.3608	135.064	-29.9339	0.383168	0.3653	0.0178685	T2	0.016	0.0252719	4.51571e-06	0.282232	0.000200698
536	Northern	Midwinter_I		Deciduous	Pileurt	Leaf	1.57949	46.3608	135.064	-29.9339	0.383168	0.3653	0.0178685	T4	0.09	0.142154	2.54009e-05	0.282232	0.00112893
539	Northern	Midwinter_II		Deciduous	Pileurt	Leaf	0.816941	46.8064	729.819	-30.8469	0.383331	0.3653	0.0180311	Y1	0.015	0.0122541	2.20955e-06	0.147303	9.82021e-05
540	Northern	Midwinter_II		Deciduous	Pileurt	Leaf	0.816941	46.8064	729.819	-30.8469	0.383331	0.3653	0.0180311	Y2	0.3	0.245082	4.4191e-05	0.147303	0.00196404
541	Northern	Midwinter_II		Deciduous	Pileurt	Leaf	0.816941	46.8064	729.819	-30.8469	0.383331	0.3653	0.0180311	Y3	0.18	0.147049	2.65146e-05	0.147303	0.00117843
542	Northern	Midwinter_II		Deciduous	Pileurt	Leaf	0.816941	46.8064	729.819	-30.8469	0.383331	0.3653	0.0180311	T1	0.07	0.0571859	1.03112e-05	0.147303	0.000458277
543	Northern	Midwinter_II		Deciduous	Pileurt	Leaf	0.816941	46.8064	729.819	-30.8469	0.383331	0.3653	0.0180311	T2	0.016	0.0130711	2.35685e-06	0.147303	0.000104749
544	Northern	Midwinter_II		Deciduous	Pileurt	Leaf	0.816941	46.8064	729.819	-30.8469	0.383331	0.3653	0.0180311	T4	0.09	0.0735247	1.32573e-05	0.147303	0.000589213
547	Northern	Late_Winter_C		Deciduous	Pileurt	Leaf	1.53557	42.8819	86.224	-30.3215	0.381899	0.3653	0.0165995	Y1	0.015	0.0230335	3.82344e-06	0.254896	0.000169931
548	Northern	Late_Winter_C		Deciduous	Pileurt	Leaf	1.53557	42.8819	86.224	-30.3215	0.381899	0.3653	0.0165995	Y2	0.3	0.460671	7.64689e-05	0.254896	0.00339862
549	Northern	Late_Winter_C		Deciduous	Pileurt	Leaf	1.53557	42.8819	86.224	-30.3215	0.381899	0.3653	0.0165995	Y3	0.18	0.276403	4.58813e-05	0.254896	0.00203917
550	Northern	Late_Winter_C		Deciduous	Pileurt	Leaf	1.53557	42.8819	86.224	-30.3215	0.381899	0.3653	0.0165995	T1	0.07	0.10749	1.78427e-05	0.254896	0.00079301
551	Northern	Late_Winter_C		Deciduous	Pileurt	Leaf	1.53557	42.8819	86.224	-30.3215	0.381899	0.3653	0.0165995	T2	0.016	0.0245691	4.07834e-06	0.254896	0.00018126
552	Northern	Late_Winter_C		Deciduous	Pileurt	Leaf	1.53557	42.8819	86.224	-30.3215	0.381899	0.3653	0.0165995	T4	0.09	0.138201	2.29407e-05	0.254896	0.00101958
555	Northern	Late_Winter_WW		Deciduous	Pileurt	Leaf	0.495551	43.2179	101.193	-30.1365	0.382022	0.3653	0.016722	Y1	0.015	0.00743326	1.24299e-06	0.0828661	5.52441e-05
556	Northern	Late_Winter_WW		Deciduous	Pileurt	Leaf	0.495551	43.2179	101.193	-30.1365	0.382022	0.3653	0.016722	Y2	0.3	0.148665	2.48598e-05	0.0828661	0.00110488
557	Northern	Late_Winter_WW		Deciduous	Pileurt	Leaf	0.495551	43.2179	101.193	-30.1365	0.382022	0.3653	0.016722	Y3	0.18	0.0891992	1.49159e-05	0.0828661	0.000662929
558	Northern	Late_Winter_WW		Deciduous	Pileurt	Leaf	0.495551	43.2179	101.193	-30.1365	0.382022	0.3653	0.016722	T1	0.07	0.0346886	5.80063e-06	0.0828661	0.000257806
559	Northern	Late_Winter_WW		Deciduous	Pileurt	Leaf	0.495551	43.2179	101.193	-30.1365	0.382022	0.3653	0.016722	T2	0.016	0.00792882	1.32586e-06	0.0828661	5.8927e-05
560	Northern	Late_Winter_WW		Deciduous	Pileurt	Leaf	0.495551	43.2179	101.193	-30.1365	0.382022	0.3653	0.016722	T4	0.09	0.0445996	7.45795e-06	0.0828661	0.000331464
566	Northern	Early_Winter		Deciduous	Salix	Leaf	1.92144	44.6433	282.926	-28.8258	0.382542	0.365374	0.0171682	Y2	0.92	1.76772	0.000303486	0.329876	0.0134883
567	Northern	Early_Winter		Deciduous	Salix	Leaf	1.92144	44.6433	282.926	-28.8258	0.382542	0.365374	0.0171682	Y4	0.05	0.0960719	1.64938e-05	0.329876	0.000733058
568	Northern	Early_Winter		Deciduous	Salix	Leaf	1.92144	44.6433	282.926	-28.8258	0.382542	0.365374	0.0171682	T1	0.21	0.403502	6.9274e-05	0.329876	0.00307884
569	Northern	Early_Winter		Deciduous	Salix	Leaf	1.92144	44.6433	282.926	-28.8258	0.382542	0.365374	0.0171682	T3	0.05	0.0960719	1.64938e-05	0.329876	0.000733058
570	Northern	Early_Winter		Deciduous	Salix	Leaf	1.92144	44.6433	282.926	-28.8258	0.382542	0.365374	0.0171682	T4	0.03	0.0576431	9.89628e-06	0.329876	0.000439835
584	Northern	Midwinter_I		Deciduous	Salix	Leaf	2.27021	43.0516	19.148	-28.3389	0.381961	0.365374	0.0165875	Y2	0.92	2.0886	0.000346447	0.376573	0.0153976
585	Northern	Midwinter_I		Deciduous	Salix	Leaf	2.27021	43.0516	19.148	-28.3389	0.381961	0.365374	0.0165875	Y4	0.05	0.113511	1.88286e-05	0.376573	0.000836829
586	Northern	Midwinter_I		Deciduous	Salix	Leaf	2.27021	43.0516	19.148	-28.3389	0.381961	0.365374	0.0165875	T1	0.21	0.476745	7.90803e-05	0.376573	0.00351468
587	Northern	Midwinter_I		Deciduous	Salix	Leaf	2.27021	43.0516	19.148	-28.3389	0.381961	0.365374	0.0165875	T3	0.05	0.113511	1.88286e-05	0.376573	0.000836829
588	Northern	Midwinter_I		Deciduous	Salix	Leaf	2.27021	43.0516	19.148	-28.3389	0.381961	0.365374	0.0165875	T4	0.03	0.0681064	1.12972e-05	0.376573	0.000502097
602	Northern	Midwinter_II		Deciduous	Salix	Leaf	1.97647	40.4107	49.869	-29.0899	0.380998	0.365374	0.0156241	Y2	0.92	1.81835	0.000284102	0.308807	0.0126268
603	Northern	Midwinter_II		Deciduous	Salix	Leaf	1.97647	40.4107	49.869	-29.0899	0.380998	0.365374	0.0156241	Y4	0.05	0.0988235	1.54403e-05	0.308807	0.000686237
604	Northern	Midwinter_II		Deciduous	Salix	Leaf	1.97647	40.4107	49.869	-29.0899	0.380998	0.365374	0.0156241	T1	0.21	0.415059	6.48494e-05	0.308807	0.00288219
605	Northern	Midwinter_II		Deciduous	Salix	Leaf	1.97647	40.4107	49.869	-29.0899	0.380998	0.365374	0.0156241	T3	0.05	0.0988235	1.54403e-05	0.308807	0.000686237
606	Northern	Midwinter_II		Deciduous	Salix	Leaf	1.97647	40.4107	49.869	-29.0899	0.380998	0.365374	0.0156241	T4	0.03	0.0592941	9.2642e-06	0.308807	0.000411742
620	Northern	Late_Winter_C		Deciduous	Salix	Leaf	2.64016	44.8005	26.4958	-28.902	0.382599	0.365374	0.0172255	Y2	0.92	2.42894	0.000418398	0.454781	0.0185955
621	Northern	Late_Winter_C		Deciduous	Salix	Leaf	2.64016	44.8005	26.4958	-28.902	0.382599	0.365374	0.0172255	Y4	0.05	0.132008	2.2739e-05	0.454781	0.00101062
622	Northern	Late_Winter_C		Deciduous	Salix	Leaf	2.64016	44.8005	26.4958	-28.902	0.382599	0.365374	0.0172255	T1	0.21	0.554433	9.5504e-05	0.454781	0.00424462
623	Northern	Late_Winter_C		Deciduous	Salix	Leaf	2.64016	44.8005	26.4958	-28.902	0.382599	0.365374	0.0172255	T3	0.05	0.132008	2.2739e-05	0.454781	0.00101062
624	Northern	Late_Winter_C		Deciduous	Salix	Leaf	2.64016	44.8005	26.4958	-28.902	0.382599	0.365374	0.0172255	T4	0.03	0.0792047	1.36434e-05	0.454781	0.000606374
638	Northern	Late_Winter_WW		Deciduous	Salix	Leaf	1.59891	52.0948	199.256	-28.8315	0.38526	0.365374	0.0198864	Y2	0.92	1.471	0.000292529	0.317966	0.0130013
639	Northern	Late_Winter_WW		Deciduous	Salix	Leaf	1.59891	52.0948	199.256	-28.8315	0.38526	0.365374	0.0198864	Y4	0.05	0.0799457	1.58983e-05	0.317966	0.000706591
640	Northern	Late_Winter_WW		Deciduous	Salix	Leaf	1.59891	52.0948	199.256	-28.8315	0.38526	0.365374	0.0198864	T1	0.21	0.335772	6.67728e-05	0.317966	0.00296768
641	Northern	Late_Winter_WW		Deciduous	Salix	Leaf	1.59891	52.0948	199.256	-28.8315	0.38526	0.365374	0.0198864	T3	0.05	0.0799457	1.58983e-05	0.317966	0.000706591
642	Northern	Late_Winter_WW		Deciduous	Salix	Leaf	1.59891	52.0948	199.256	-28.8315	0.38526	0.365374	0.0198864	T4	0.03	0.0479674	9.53897e-06	0.317966	0.000423954
656	Northern	Early_Winter		Deciduous	Salix	Stem	1.5457	48.6037	0.253	-27.3958	0.383987	0.365374	0.0186129	Y2	8.69	13.4322	0.00250012	0.2877	0.111116
657	Northern	Early_Winter		Deciduous	Salix	Stem	1.5457	48.6037	0.253	-27.3958	0.383987	0.365374	0.0186129	Y4	1.87	2.89047	0.000538	0.2877	0.0239111
658	Northern	Early_Winter		Deciduous	Salix	Stem	1.5457	48.6037	0.253	-27.3958	0.383987	0.365374	0.0186129	T1	4.3	6.64653	0.00123711	0.2877	0.0549827
659	Northern	Early_Winter		Deciduous	Salix	Stem	1.5457	48.6037	0.253	-27.3958	0.383987	0.365374	0.0186129	T3	9.03	13.9577	0.00259793	0.2877	0.115464
660	Northern	Early_Winter		Deciduous	Salix	Stem	1.5457	48.6037	0.253	-27.3958	0.383987	0.365374	0.0186129	T4	1.87	2.89047	0.000538	0.2877	0.0239111
676	Northern	Midwinter_I		Deciduous	Salix	Stem	1.18917	47.5949	8.924	-28.1319	0.383619	0.365374	0.0182449	Y2	8.69	10.3339	0.00188541	0.216963	0.0837958
677	Northern	Midwinter_I		Deciduous	Salix	Stem	1.18917	47.5949	8.924	-28.1319	0.383619	0.365374	0.0182449	Y4	1.87	2.22375	0.00040572	0.216963	0.018032
678	Northern	Midwinter_I		Deciduous	Salix	Stem	1.18917	47.5949	8.924	-28.1319	0.383619	0.365374	0.0182449	T1	4.3	5.11343	0.00093294	0.216963	0.041464
679	Northern	Midwinter_I		Deciduous	Salix	Stem	1.18917	47.5949	8.924	-28.1319	0.383619	0.365374	0.0182449	T3	9.03	10.7382	0.00195917	0.216963	0.0870744
680	Northern	Midwinter_I		Deciduous	Salix	Stem	1.18917	47.5949	8.924	-28.1319	0.383619	0.365374	0.0182449	T4	1.87	2.22375	0.00040572	0.216963	0.018032
696	Northern	Midwinter_II		Deciduous	Salix	Stem	1.88847	43.4735	14.805	-27.8989	0.382115	0.365374	0.0167414	Y2	8.69	16.4108	0.00274741	0.316158	0.122107
697	Northern	Midwinter_II		Deciduous	Salix	Stem	1.88847	43.4735	14.805	-27.8989	0.382115	0.365374	0.0167414	Y4	1.87	3.53144	0.000591215	0.316158	0.0262762
698	Northern	Midwinter_II		Deciduous	Salix	Stem	1.88847	43.4735	14.805	-27.8989	0.382115	0.365374	0.0167414	T1	4.3	8.12043	0.00135948	0.316158	0.0604212
699	Northern	Midwinter_II		Deciduous	Salix	Stem	1.88847	43.4735	14.805	-27.8989	0.382115	0.365374	0.0167414	T3	9.03	17.0529	0.0028549	0.316158	0.126885
700	Northern	Midwinter_II		Deciduous	Salix	Stem	1.88847	43.4735	14.805	-27.8989	0.382115	0.365374	0.0167414	T4	1.87	3.53144	0.000591215	0.316158	0.0262762
716	Northern	Late_Winter_C		Deciduous	Salix	Stem	1.5847	48.2456	15.2457	-29.058	0.383856	0.365374	0.0184823	Y2	8.69	13.771	0.0025452	0.292888	0.11312
717	Northern	Late_Winter_C		Deciduous	Salix	Stem	1.5847	48.2456	15.2457	-29.058	0.383856	0.365374	0.0184823	Y4	1.87	2.96339	0.000547701	0.292888	0.0243423
718	Northern	Late_Winter_C		Deciduous	Salix	Stem	1.5847	48.2456	15.2457	-29.058	0.383856	0.365374	0.0184823	T1	4.3	6.81421	0.00125942	0.292888	0.0559742
719	Northern	Late_Winter_C		Deciduous	Salix	Stem	1.5847	48.2456	15.2457	-29.058	0.383856	0.365374	0.0184823	T3	9.03	14.3098	0.00264478	0.292888	0.117546
720	Northern	Late_Winter_C		Deciduous	Salix	Stem	1.5847	48.2456	15.2457	-29.058	0.383856	0.365374	0.0184823	T4	1.87	2.96339	0.000547701	0.292888	0.0243423
736	Northern	Late_Winter_WW		Deciduous	Salix	Stem	1.48077	46.0476	54.533	-27.7795	0.383054	0.365374	0.0176805	Y2	8.69	12.8679	0.0022751	0.261807	0.101116
737	Northern	Late_Winter_WW		Deciduous	Salix	Stem	1.48077	46.0476	54.533	-27.7795	0.383054	0.365374	0.0176805	Y4	1.87	2.76903	0.000489579	0.261807	0.021759
738	Northern	Late_Winter_WW		Deciduous	Salix	Stem	1.48077	46.0476	54.533	-27.7795	0.383054	0.365374	0.0176805	T1	4.3	6.3673	0.00112577	0.261807	0.0500342
739	Northern	Late_Winter_WW		Deciduous	Salix	Stem	1.48077	46.0476	54.533	-27.7795	0.383054	0.365374	0.0176805	T3	9.03	13.3713	0.00236411	0.261807	0.105072
740	Northern	Late_Winter_WW		Deciduous	Salix	Stem	1.48077	46.0476	54.533	-27.7795	0.383054	0.365374	0.0176805	T4	1.87	2.76903	0.000489579	0.261807	0.021759
755	Northern	Early_Winter		Moss	Lichen	Leaf	1.56318	32.8684	1353.12	-27.1238	0.378246	0.365577	0.0126689	T1	0.05	0.0781589	9.90188e-06	0.198038	0.000440084
756	Northern	Early_Winter		Moss	Lichen	Leaf	1.56318	32.8684	1353.12	-27.1238	0.378246	0.365577	0.0126689	T2	0.18	0.281372	3.56468e-05	0.198038	0.0015843
757	Northern	Early_Winter		Moss	Lichen	Leaf	1.56318	32.8684	1353.12	-27.1238	0.378246	0.365577	0.0126689	T3	0.03	0.0468953	5.94113e-06	0.198038	0.00026405
758	Northern	Early_Winter		Moss	Lichen	Leaf	1.56318	32.8684	1353.12	-27.1238	0.378246	0.365577	0.0126689	T4	0.18	0.281372	3.56468e-05	0.198038	0.0015843
759	Northern	Early_Winter		Moss	Lichen	Leaf	1.56318	32.8684	1353.12	-27.1238	0.378246	0.365577	0.0126689	T5	0.2	0.312636	3.96075e-05	0.198038	0.00176033
772	Northern	Midwinter_I		Moss	Lichen	Leaf	0.541027	38.2411	12229.6	-25.0469	0.380206	0.365577	0.014629	T1	0.05	0.0270514	3.95734e-06	0.0791469	0.000175882
773	Northern	Midwinter_I		Moss	Lichen	Leaf	0.541027	38.2411	12229.6	-25.0469	0.380206	0.365577	0.014629	T2	0.18	0.0973849	1.42464e-05	0.0791469	0.000633175
774	Northern	Midwinter_I		Moss	Lichen	Leaf	0.541027	38.2411	12229.6	-25.0469	0.380206	0.365577	0.014629	T3	0.03	0.0162308	2.37441e-06	0.0791469	0.000105529
775	Northern	Midwinter_I		Moss	Lichen	Leaf	0.541027	38.2411	12229.6	-25.0469	0.380206	0.365577	0.014629	T4	0.18	0.0973849	1.42464e-05	0.0791469	0.000633175
776	Northern	Midwinter_I		Moss	Lichen	Leaf	0.541027	38.2411	12229.6	-25.0469	0.380206	0.365577	0.014629	T5	0.2	0.108205	1.58294e-05	0.0791469	0.000703528
786	Northern	Early_Winter		Deciduous	Dryas	Leaf	1.32417	40.9511	266.274	-32.5498	0.381195	0.365246	0.015949	Y2	1.1	1.45658	0.00023231	0.211191	0.0103249
787	Northern	Early_Winter		Deciduous	Dryas	Leaf	1.32417	40.9511	266.274	-32.5498	0.381195	0.365246	0.015949	Y3	5.73	7.58747	0.00121012	0.211191	0.0537832
788	Northern	Early_Winter		Deciduous	Dryas	Leaf	1.32417	40.9511	266.274	-32.5498	0.381195	0.365246	0.015949	Y5	6.4	8.47466	0.00135162	0.211191	0.060072
789	Northern	Early_Winter		Deciduous	Dryas	Leaf	1.32417	40.9511	266.274	-32.5498	0.381195	0.365246	0.015949	T2	0.72	0.953399	0.000152057	0.211191	0.0067581
790	Northern	Early_Winter		Deciduous	Dryas	Leaf	1.32417	40.9511	266.274	-32.5498	0.381195	0.365246	0.015949	T5	0.68	0.900433	0.00014361	0.211191	0.00638265
796	Northern	Late_Winter_C		Deciduous	Dryas	Leaf	1.4661	44.5831	64.493	-30.8605	0.38252	0.365246	0.0172739	Y2	1.1	1.61271	0.000278579	0.253253	0.0123813
797	Northern	Late_Winter_C		Deciduous	Dryas	Leaf	1.4661	44.5831	64.493	-30.8605	0.38252	0.365246	0.0172739	Y3	5.73	8.40076	0.00145114	0.253253	0.0644952
798	Northern	Late_Winter_C		Deciduous	Dryas	Leaf	1.4661	44.5831	64.493	-30.8605	0.38252	0.365246	0.0172739	Y5	6.4	9.38305	0.00162082	0.253253	0.0720365
799	Northern	Late_Winter_C		Deciduous	Dryas	Leaf	1.4661	44.5831	64.493	-30.8605	0.38252	0.365246	0.0172739	T2	0.72	1.05559	0.000182342	0.253253	0.00810411
800	Northern	Late_Winter_C		Deciduous	Dryas	Leaf	1.4661	44.5831	64.493	-30.8605	0.38252	0.365246	0.0172739	T5	0.68	0.996949	0.000172212	0.253253	0.00765388
810	Northern	Early_Winter		Deciduous	Betula	Leaf	1.79147	46.7314	6.19	-30.2258	0.383304	0.364901	0.0184027	Y3	0.14	0.250806	4.61552e-05	0.32968	0.00205134
811	Northern	Early_Winter		Deciduous	Betula	Leaf	1.79147	46.7314	6.19	-30.2258	0.383304	0.364901	0.0184027	T2	2.3	4.12039	0.000758263	0.32968	0.0337006
817	Northern	Midwinter_I		Deciduous	Betula	Leaf	1.40728	41.6593	4.312	-29.6239	0.381453	0.364901	0.0165525	Y3	0.14	0.19702	3.26116e-05	0.23294	0.0014494
818	Northern	Midwinter_I		Deciduous	Betula	Leaf	1.40728	41.6593	4.312	-29.6239	0.381453	0.364901	0.0165525	T2	2.3	3.23675	0.000535762	0.23294	0.0238116
824	Northern	Midwinter_II		Deciduous	Betula	Leaf	1.52096	36.4193	9.102	-29.4569	0.379542	0.364901	0.0146409	Y3	0.14	0.212935	3.11755e-05	0.222682	0.00138558
825	Northern	Midwinter_II		Deciduous	Betula	Leaf	1.52096	36.4193	9.102	-29.4569	0.379542	0.364901	0.0146409	T2	2.3	3.49822	0.000512169	0.222682	0.0227631
831	Northern	Late_Winter_C		Deciduous	Betula	Leaf	1.54233	39.388	12.233	-30.8835	0.380625	0.364901	0.0157239	Y3	0.14	0.215927	3.39521e-05	0.242515	0.00150898
832	Northern	Late_Winter_C		Deciduous	Betula	Leaf	1.54233	39.388	12.233	-30.8835	0.380625	0.364901	0.0157239	T2	2.3	3.54737	0.000557784	0.242515	0.0247904
838	Northern	Late_Winter_WW		Deciduous	Betula	Leaf	1.48238	39.6594	3.787	-29.5425	0.380724	0.364901	0.0158229	Y3	0.14	0.207534	3.28378e-05	0.234556	0.00145946
839	Northern	Late_Winter_WW		Deciduous	Betula	Leaf	1.48238	39.6594	3.787	-29.5425	0.380724	0.364901	0.0158229	T2	2.3	3.40948	0.000539479	0.234556	0.0239768
845	Northern	Early_Winter		Deciduous	Betula	Stem	1.99539	51.6396	14.069	-29.2298	0.385094	0.364901	0.0201931	Y3	7.83	15.6239	0.00315496	0.402932	0.14022
846	Northern	Early_Winter		Deciduous	Betula	Stem	1.99539	51.6396	14.069	-29.2298	0.385094	0.364901	0.0201931	T2	22.2	44.2977	0.0089451	0.402932	0.39756
852	Northern	Midwinter_I		Deciduous	Betula	Stem	0.911162	53.0536	13.616	-29.0949	0.38561	0.364901	0.020709	Y3	7.83	7.1344	0.00147746	0.188692	0.0656649
853	Northern	Midwinter_I		Deciduous	Betula	Stem	0.911162	53.0536	13.616	-29.0949	0.38561	0.364901	0.020709	T2	22.2	20.2278	0.00418896	0.188692	0.186176
859	Northern	Midwinter_II		Deciduous	Betula	Stem	1.19495	40.8892	9.732	-29.0889	0.381172	0.364901	0.0162715	Y3	7.83	9.35649	0.00152244	0.194437	0.0676641
860	Northern	Midwinter_II		Deciduous	Betula	Stem	1.19495	40.8892	9.732	-29.0889	0.381172	0.364901	0.0162715	T2	22.2	26.528	0.00431651	0.194437	0.191845
866	Northern	Late_Winter_C		Deciduous	Betula	Stem	1.54401	46.9395	11.056	-30.2275	0.38338	0.364901	0.0184786	Y3	7.83	12.0896	0.002234	0.285313	0.0992888
867	Northern	Late_Winter_C		Deciduous	Betula	Stem	1.54401	46.9395	11.056	-30.2275	0.38338	0.364901	0.0184786	T2	22.2	34.2771	0.00633394	0.285313	0.281508
873	Northern	Late_Winter_WW		Deciduous	Betula	Stem	1.09099	52.3828	13.975	-29.6345	0.385365	0.364901	0.0204642	Y3	7.83	8.54249	0.00174816	0.223264	0.0776958
874	Northern	Late_Winter_WW		Deciduous	Betula	Stem	1.09099	52.3828	13.975	-29.6345	0.385365	0.364901	0.0204642	T2	22.2	24.2201	0.00495645	0.223264	0.220287
882	Northern	Early_Winter		Moss	Moss	Leaf	0.989326	39.3743	281.146	-30.3678	0.38062	0.365431	0.0151883	Y1	3.61	3.57147	0.000542444	0.150262	0.0241086
883	Northern	Early_Winter		Moss	Moss	Leaf	0.989326	39.3743	281.146	-30.3678	0.38062	0.365431	0.0151883	Y3	0.05	0.0494663	7.51308e-06	0.150262	0.000333915
884	Northern	Early_Winter		Moss	Moss	Leaf	0.989326	39.3743	281.146	-30.3678	0.38062	0.365431	0.0151883	Y4	1.23	1.21687	0.000184822	0.150262	0.0082143
885	Northern	Early_Winter		Moss	Moss	Leaf	0.989326	39.3743	281.146	-30.3678	0.38062	0.365431	0.0151883	Y5	1.1	1.08826	0.000165288	0.150262	0.00734612
886	Northern	Early_Winter		Moss	Moss	Leaf	0.989326	39.3743	281.146	-30.3678	0.38062	0.365431	0.0151883	T1	6.08	6.0151	0.000913591	0.150262	0.040604
887	Northern	Early_Winter		Moss	Moss	Leaf	0.989326	39.3743	281.146	-30.3678	0.38062	0.365431	0.0151883	T3	0.08	0.0791461	1.20209e-05	0.150262	0.000534263
888	Northern	Early_Winter		Moss	Moss	Leaf	0.989326	39.3743	281.146	-30.3678	0.38062	0.365431	0.0151883	T4	0.69	0.682635	0.000103681	0.150262	0.00460802
889	Northern	Early_Winter		Moss	Moss	Leaf	0.989326	39.3743	281.146	-30.3678	0.38062	0.365431	0.0151883	T5	0.6	0.593596	9.0157e-05	0.150262	0.00400698
908	Northern	Midwinter_I		Moss	Moss	Leaf	0.637677	37.6001	3256.92	-29.0379	0.379972	0.365431	0.014541	Y1	3.61	2.30201	0.000334737	0.0927248	0.0148772
909	Northern	Midwinter_I		Moss	Moss	Leaf	0.637677	37.6001	3256.92	-29.0379	0.379972	0.365431	0.014541	Y3	0.05	0.0318838	4.63624e-06	0.0927248	0.000206055
910	Northern	Midwinter_I		Moss	Moss	Leaf	0.637677	37.6001	3256.92	-29.0379	0.379972	0.365431	0.014541	Y4	1.23	0.784343	0.000114052	0.0927248	0.00506896
911	Northern	Midwinter_I		Moss	Moss	Leaf	0.637677	37.6001	3256.92	-29.0379	0.379972	0.365431	0.014541	Y5	1.1	0.701445	0.000101997	0.0927248	0.00453321
912	Northern	Midwinter_I		Moss	Moss	Leaf	0.637677	37.6001	3256.92	-29.0379	0.379972	0.365431	0.014541	T1	6.08	3.87708	0.000563767	0.0927248	0.0250563
913	Northern	Midwinter_I		Moss	Moss	Leaf	0.637677	37.6001	3256.92	-29.0379	0.379972	0.365431	0.014541	T3	0.08	0.0510141	7.41798e-06	0.0927248	0.000329688
914	Northern	Midwinter_I		Moss	Moss	Leaf	0.637677	37.6001	3256.92	-29.0379	0.379972	0.365431	0.014541	T4	0.69	0.439997	6.39801e-05	0.0927248	0.00284356
915	Northern	Midwinter_I		Moss	Moss	Leaf	0.637677	37.6001	3256.92	-29.0379	0.379972	0.365431	0.014541	T5	0.6	0.382606	5.56349e-05	0.0927248	0.00247266
934	Northern	Midwinter_II		Moss	Moss	Leaf	1.10773	36.2012	509.897	-30.3479	0.379462	0.365431	0.0140307	Y1	3.61	3.99892	0.000561076	0.155423	0.0249367
935	Northern	Midwinter_II		Moss	Moss	Leaf	1.10773	36.2012	509.897	-30.3479	0.379462	0.365431	0.0140307	Y3	0.05	0.0553866	7.77114e-06	0.155423	0.000345384
936	Northern	Midwinter_II		Moss	Moss	Leaf	1.10773	36.2012	509.897	-30.3479	0.379462	0.365431	0.0140307	Y4	1.23	1.36251	0.00019117	0.155423	0.00849644
937	Northern	Midwinter_II		Moss	Moss	Leaf	1.10773	36.2012	509.897	-30.3479	0.379462	0.365431	0.0140307	Y5	1.1	1.21851	0.000170965	0.155423	0.00759845
938	Northern	Midwinter_II		Moss	Moss	Leaf	1.10773	36.2012	509.897	-30.3479	0.379462	0.365431	0.0140307	T1	6.08	6.73502	0.00094497	0.155423	0.0419987
939	Northern	Midwinter_II		Moss	Moss	Leaf	1.10773	36.2012	509.897	-30.3479	0.379462	0.365431	0.0140307	T3	0.08	0.0886186	1.24338e-05	0.155423	0.000552614
940	Northern	Midwinter_II		Moss	Moss	Leaf	1.10773	36.2012	509.897	-30.3479	0.379462	0.365431	0.0140307	T4	0.69	0.764336	0.000107242	0.155423	0.0047663
941	Northern	Midwinter_II		Moss	Moss	Leaf	1.10773	36.2012	509.897	-30.3479	0.379462	0.365431	0.0140307	T5	0.6	0.66464	9.32537e-05	0.155423	0.00414461
960	Northern	Late_Winter_C		Moss	Moss	Leaf	1.17937	29.3945	534.305	-29.4055	0.376979	0.365431	0.0115475	Y1	3.61	4.25754	0.000491638	0.136188	0.0218506
961	Northern	Late_Winter_C		Moss	Moss	Leaf	1.17937	29.3945	534.305	-29.4055	0.376979	0.365431	0.0115475	Y3	0.05	0.0589687	6.80939e-06	0.136188	0.000302639
962	Northern	Late_Winter_C		Moss	Moss	Leaf	1.17937	29.3945	534.305	-29.4055	0.376979	0.365431	0.0115475	Y4	1.23	1.45063	0.000167511	0.136188	0.00744493
963	Northern	Late_Winter_C		Moss	Moss	Leaf	1.17937	29.3945	534.305	-29.4055	0.376979	0.365431	0.0115475	Y5	1.1	1.29731	0.000149806	0.136188	0.00665807
964	Northern	Late_Winter_C		Moss	Moss	Leaf	1.17937	29.3945	534.305	-29.4055	0.376979	0.365431	0.0115475	T1	6.08	7.1706	0.000828021	0.136188	0.0368009
965	Northern	Late_Winter_C		Moss	Moss	Leaf	1.17937	29.3945	534.305	-29.4055	0.376979	0.365431	0.0115475	T3	0.08	0.09435	1.0895e-05	0.136188	0.000484223
966	Northern	Late_Winter_C		Moss	Moss	Leaf	1.17937	29.3945	534.305	-29.4055	0.376979	0.365431	0.0115475	T4	0.69	0.813768	9.39695e-05	0.136188	0.00417642
967	Northern	Late_Winter_C		Moss	Moss	Leaf	1.17937	29.3945	534.305	-29.4055	0.376979	0.365431	0.0115475	T5	0.6	0.707625	8.17126e-05	0.136188	0.00363167
986	Northern	Late_Winter_WW		Moss	Moss	Leaf	1.04815	37.8867	2706.88	-30.1735	0.380077	0.365431	0.0146456	Y1	3.61	3.78382	0.000554164	0.153508	0.0246295
987	Northern	Late_Winter_WW		Moss	Moss	Leaf	1.04815	37.8867	2706.88	-30.1735	0.380077	0.365431	0.0146456	Y3	0.05	0.0524075	7.67541e-06	0.153508	0.000341129
988	Northern	Late_Winter_WW		Moss	Moss	Leaf	1.04815	37.8867	2706.88	-30.1735	0.380077	0.365431	0.0146456	Y4	1.23	1.28923	0.000188815	0.153508	0.00839178
989	Northern	Late_Winter_WW		Moss	Moss	Leaf	1.04815	37.8867	2706.88	-30.1735	0.380077	0.365431	0.0146456	Y5	1.1	1.15297	0.000168859	0.153508	0.00750484
990	Northern	Late_Winter_WW		Moss	Moss	Leaf	1.04815	37.8867	2706.88	-30.1735	0.380077	0.365431	0.0146456	T1	6.08	6.37276	0.000933329	0.153508	0.0414813
991	Northern	Late_Winter_WW		Moss	Moss	Leaf	1.04815	37.8867	2706.88	-30.1735	0.380077	0.365431	0.0146456	T3	0.08	0.0838521	1.22806e-05	0.153508	0.000545807
992	Northern	Late_Winter_WW		Moss	Moss	Leaf	1.04815	37.8867	2706.88	-30.1735	0.380077	0.365431	0.0146456	T4	0.69	0.723224	0.000105921	0.153508	0.00470758
993	Northern	Late_Winter_WW		Moss	Moss	Leaf	1.04815	37.8867	2706.88	-30.1735	0.380077	0.365431	0.0146456	T5	0.6	0.628891	9.21049e-05	0.153508	0.00409355
1007					Moslyng							0.364139		nan
1008					Salix herbacea							0.364139		nan
