# Supplementary material
Source: Research Square preprint supplement (doi:10.21203/rs.3.rs-9353987/v1)
Supplement: Supplementary file 8 [file e9c5178ca911ba63b0c49b8e.xlsx]

## Sheet: Sheet1
	Site	Winter_stage	Mesocosm	Fine_coarse	N_percentage	d15N	C_Percentage	d13C	Total_dryweight_roots_mesocosm	BD_soil	Height_mesocosm	Unnamed: 11	Total_dryweight_roots_mesocosm_gsoilmethod	AT%	15NAPE%	g_dryweight_root_N_in_mesocosm	g_root_15APE%_in_mesocosm	g_root_15APE%_per_m2	Recovery_15N_pr_m2	g_root_15NAPE%_per_g_dry_root	g_dryweight_root_pr_m2	Site_FineCoarse	mg_root_15NAPE_per_g_dry_root	g_N_pr_g_dryweight_root
0	Northern	Early_Winter	Y1	Coarse	1.29818	200.786	47.1094	-28.3336	9.1137	0.462506	4.975		12.6796	0.439469	0.0744499	0.118313	8.80836e-05	0.0194763	0.0463721	9.66497e-06	405.053	Coarse-Northern	0.00966497	0.0129818
1	Northern	Early_Winter	Y2	Coarse	1.66882	1431.73	44.3164	-28.5326	13.6612	0.376303	2.725		36.8602	0.885984	0.520965	0.227981	0.0011877	0.143844	0.342486	8.69399e-05	607.164	Coarse-Northern	0.0869399	0.0166882
2	Northern	Early_Winter	Y3	Coarse	1.17379	2605.91	42.5228	-27.9996	8.53693	0.479963	5.25		10.0526	1.30819	0.943172	0.100205	0.00094511	0.220526	0.525061	0.000110708	379.419	Coarse-Northern	0.110708	0.0117379
3	Northern	Early_Winter	Y4	Coarse	0.983094	626.519	48.4074	-29.4986	6.72598	0.352665	5.85		6.98768	0.594355	0.229336	0.0661228	0.000151643	0.0394272	0.0938742	2.25458e-05	298.933	Coarse-Northern	0.0225458	0.00983094
4	Northern	Early_Winter	Y5	Coarse	0.927019	1612.58	47.7554	-29.5836	13.7796	0.706327	7.275		7.47356	0.951248	0.586229	0.127739	0.000748844	0.242126	0.576491	5.43445e-05	612.425	Coarse-Northern	0.0543445	0.00927019
5	Northern	Early_Winter	T1	Coarse	0.857976	851.286	45.7185	-28.6656	8.23535	1.26914	4.475		8.41945	0.675933	0.310914	0.0706573	0.000219683	0.0436926	0.10403	2.66756e-05	366.016	Coarse-Northern	0.0266756	0.00857976
6	Northern	Early_Winter	T2	Coarse	0.922761	617.696	47.8982	-27.4126	7.42182	0.789886	2.725		20.386	0.59115	0.226131	0.0684857	0.000154867	0.0187561	0.0446574	2.08665e-05	329.859	Coarse-Northern	0.0208665	0.00922761
7	Northern	Early_Winter	T3	Coarse	0.81114	710.678	47.246	-28.2766	14.0629	0.95828	4.25		16.7382	0.624915	0.259896	0.11407	0.000296464	0.0559987	0.13333	2.10812e-05	625.019	Coarse-Northern	0.0210812	0.0081114
8	Northern	Early_Winter	T4	Coarse	0.783437	103.422	41.8931	-29.8996	13.7333	1.0498	4.775		14.8938	0.403979	0.0389602	0.107592	4.1918e-05	0.00889593	0.0211808	3.05229e-06	610.37	Coarse-Northern	0.00305229	0.00783437
9	Northern	Early_Winter	T5	Coarse	0.753402	2094.61	45.7214	-29.1516	5.87142	1.19894	4.65		7.00946	1.12478	0.759766	0.0442354	0.000336085	0.0694576	0.165375	5.72409e-05	260.952	Coarse-Northern	0.0572409	0.00753402
10	Eastern	Early_Winter	K1	Coarse	1.25545	2654.16	46.2727	-28.6036	14.9309	1.10158	4.425		10.1184	1.32546	0.960445	0.18745	0.00180036	0.35407	0.843023	0.000120579	663.595	Coarse-Eastern	0.120579	0.0125545
11	Eastern	Early_Winter	K2	Coarse	1.01766	4105.74	49.9788	-28.8406	19.8277	0.866437	4.9		17.2698	1.84229	1.47727	0.201778	0.00298081	0.649153	1.5456	0.000150336	881.23	Coarse-Eastern	0.150336	0.0101766
12	Eastern	Early_Winter	K3	Coarse	0.842467	3837.38	46.4446	-28.3976	8.64748	0.849808	6.025		5.77979	1.74715	1.38213	0.0728522	0.00100691	0.269629	0.641974	0.00011644	384.332	Coarse-Eastern	0.11644	0.00842467
13	Eastern	Early_Winter	K4	Coarse	0.644245	4456.75	50.6661	-28.4856	25.3722	0.882917	6.2		14.233	1.96645	1.60144	0.163459	0.00261769	0.721319	1.71743	0.000103172	1127.65	Coarse-Eastern	0.103172	0.00644245
14	Eastern	Early_Winter	K5	Coarse	1.06165	3270.39	43.5993	-26.8776	18.1187	1.15602	6.025		11.7875	1.54553	1.18051	0.192359	0.00227082	0.608076	1.4478	0.00012533	805.278	Coarse-Eastern	0.12533	0.0106165
15	Eastern	Early_Winter	K6	Coarse	0.78031	2707.71	51.1503	-26.3396	14.9614	0.424759	6.925		11.4765	1.34463	0.979608	0.116745	0.00114365	0.35199	0.83807	7.64398e-05	664.952	Coarse-Eastern	0.0764398	0.0078031
16	Eastern	Early_Winter	K7	Coarse	0.512944	93.3706	39.1252	-28.8196	11.7901	0.783119	5.675		7.34124	0.400314	0.0352951	0.0604767	2.13453e-05	0.00538376	0.0128185	1.81044e-06	524.005	Coarse-Eastern	0.00181044	0.00512944
17	Eastern	Early_Winter	K8	Coarse	0.87908	7167.25	44.9228	-28.9736	5.79853	1.01003	5.95		2.94103	2.91477	2.54975	0.0509737	0.0012997	0.343699	0.818332	0.000224143	257.713	Coarse-Eastern	0.224143	0.0087908
18	Southeastern	Early_Winter	S1	Coarse	0.840381	1423.84	48.4433	-27.2196	10.7866	0.387981	6.25		11.3425	0.883136	0.518117	0.0906484	0.000469665	0.130462	0.310625	4.35416e-05	479.404	Coarse-Southeastern	0.0435416	0.00840381
19	Southeastern	Early_Winter	S2	Coarse	0.704629	752.287	48.1252	-29.0406	11.4897	0.990526	2.775		15.4565	0.640018	0.274999	0.08096	0.000222639	0.0274588	0.0653782	1.93772e-05	510.655	Coarse-Southeastern	0.0193772	0.00704629
20	Southeastern	Early_Winter	S3	Coarse	1.01849	1212.91	49.027	-27.8466	7.1998	1.07056	3.6		5.50776	0.806903	0.441884	0.0733294	0.000324031	0.0518449	0.12344	4.50055e-05	319.991	Coarse-Southeastern	0.0450055	0.0101849
21	Southeastern	Early_Winter	S4	Coarse	0.738061	2736.35	50.0914	-26.4016	31.3115	0.708612	4.20833		10.7689	1.35487	0.989856	0.231098	0.00228754	0.427855	1.0187	7.30574e-05	1391.62	Coarse-Southeastern	0.0730574	0.00738061
22	Southeastern	Early_Winter	S5	Coarse	0.811998	629.997	46.3945	-28.5926	7.3933	1.0071	7		4.31098	0.595618	0.230599	0.0600334	0.000138436	0.0430691	0.102545	1.87246e-05	328.591	Coarse-Southeastern	0.0187246	0.00811998
23	Southeastern	Early_Winter	S6	Coarse	0.605791	1961.99	46.3438	-28.6156	127.387	0.74273	5.9		31.7026	1.0771	0.712082	0.771702	0.00549515	1.44095	3.43084	4.31373e-05	5661.66	Coarse-Southeastern	0.0431373	0.00605791
24	Southeastern	Early_Winter	S7	Coarse	0.80869	65.1896	49.2315	-28.4616	7.73151	0.506874	4.95556		7.2271	0.390036	0.0250175	0.0625239	1.56419e-05	0.00344508	0.00820257	2.02314e-06	343.623	Coarse-Southeastern	0.00202314	0.0080869
25	Southeastern	Early_Winter	S8	Coarse	0.712343	6330.39	48.0995	-28.0116	1.57145	0.555923	4.73981		1.95045	2.62395	2.25893	0.0111941	0.000252866	0.0532684	0.12683	0.000160913	69.8421	Coarse-Southeastern	0.160913	0.00712343
26	Southern	Early_Winter	F1	Coarse	0.660787	2070.18	47.6388	-27.3376	6.68127	0.852894	5.35		6.99598	1.116	0.750982	0.0441489	0.000331551	0.0788354	0.187703	4.96239e-05	296.945	Coarse-Southern	0.0496239	0.00660787
27	Southern	Early_Winter	F2	Coarse	0.468101	13941.5	51.8528	-26.4926	7.57769	0.792435	4		11.8194	5.20651	4.8415	0.0354712	0.00171734	0.305304	0.726915	0.000226631	336.786	Coarse-Southern	0.226631	0.00468101
28	Southern	Early_Winter	F3	Coarse	0.764088	6045.64	50.6867	-27.1896	12.7663	0.45135	5.3		9.76251	2.52459	2.15957	0.097546	0.00210658	0.496216	1.18147	0.000165011	567.392	Coarse-Southern	0.165011	0.00764088
29	Southern	Early_Winter	F4	Coarse	0.546195	15133.3	48.4305	-27.8166	8.17173	1.11475	2.35		13.3017	5.59858	5.23356	0.0446336	0.00233592	0.243974	0.580891	0.000285854	363.188	Coarse-Southern	0.285854	0.00546195
30	Southern	Early_Winter	F5	Coarse	0.418987	6153.65	55.5967	-26.2516	0.879745	0.252148	2.725		5.78851	2.5623	2.19728	0.00368602	8.09923e-05	0.00980906	0.0233549	9.20633e-05	39.0998	Coarse-Southern	0.0920633	0.00418987
31	Southern	Early_Winter	F6	Coarse	0.79287	1717.17	51.0713	-26.7376	9.17144	0.535721	3.65		18.6635	0.988955	0.623936	0.0727176	0.000453711	0.0736021	0.175243	4.947e-05	407.62	Coarse-Southern	0.04947	0.0079287
32	Southern	Early_Winter	F7	Coarse	0.560183	4626.55	52.6242	-27.2416	5.34082	0.951573	2.90833		6.96875	2.02641	1.66139	0.0299184	0.00049706	0.0642497	0.152975	9.30681e-05	237.37	Coarse-Southern	0.0930681	0.00560183
33	Southern	Early_Winter	F8	Coarse	0.668899	4734.07	52.1871	-27.7936	40.2679	1.01218	7.3		4.79976	2.06433	1.69931	0.269351	0.00457712	1.48502	3.53576	0.000113667	1789.68	Coarse-Southern	0.113667	0.00668899
34	Northern	Midwinter_I	Y1	Coarse	1.35032	161.882	45.7037	-28.5396	25.0004	0.462506	4.975		34.7823	0.425291	0.0602722	0.337585	0.00020347	0.0449895	0.107118	8.13867e-06	1111.13	Coarse-Northern	0.00813867	0.0135032
35	Northern	Midwinter_I	Y2	Coarse	1.12127	232.681	46.0289	-28.7066	3.35461	0.376303	2.725		9.05131	0.451089	0.0860704	0.0376144	3.23748e-05	0.00392095	0.0093356	9.65084e-06	149.094	Coarse-Northern	0.00965084	0.0112127
36	Northern	Midwinter_I	Y3	Coarse	1.18759	1505.92	45.5589	-27.8796	28.3191	0.479963	5.25		33.347	0.912768	0.547749	0.336315	0.00184216	0.429838	1.02342	6.50502e-05	1258.63	Coarse-Northern	0.0650502	0.0118759
37	Northern	Midwinter_I	Y4	Coarse	0.822622	90.3026	49.4584	-29.3716	28.4958	0.352665	5.85		29.6045	0.399195	0.0341763	0.234412	8.01135e-05	0.0208295	0.0495941	2.81142e-06	1266.48	Coarse-Northern	0.00281142	0.00822622
38	Northern	Midwinter_I	Y5	Coarse	0.955913	2650.49	48.6101	-28.8896	18.1527	0.706327	7.275		9.84537	1.32415	0.959132	0.173524	0.00166432	0.53813	1.28126	9.16847e-05	806.785	Coarse-Northern	0.0916847	0.00955913
39	Northern	Midwinter_I	T1	Coarse	0.915754	518.288	47.9739	-27.8826	13.2493	1.26914	4.475		13.5455	0.555025	0.190006	0.121331	0.000230536	0.045851	0.109169	1.73999e-05	588.857	Coarse-Northern	0.0173999	0.00915754
40	Northern	Midwinter_I	T2	Coarse	0.782837	147.845	47.3706	-29.2576	10.0059	0.789886	2.725		27.4839	0.420175	0.0551558	0.0783302	4.32036e-05	0.00523244	0.0124582	4.3178e-06	444.709	Coarse-Northern	0.0043178	0.00782837
41	Northern	Midwinter_I	T3	Coarse	0.985774	830.189	47.4012	-27.6918	23.9596	0.95828	4.25		28.5175	0.668282	0.303263	0.236187	0.000716267	0.135295	0.32213	2.98948e-05	1064.87	Coarse-Northern	0.0298948	0.00985774
42	Northern	Midwinter_I	T4	Coarse	0.693758	868.242	49.1175	-28.4608	15.7383	1.0498	4.775		23.7239	0.682082	0.317063	0.109185	0.000346186	0.0734684	0.174925	2.19965e-05	699.478	Coarse-Northern	0.0219965	0.00693758
43	Northern	Midwinter_I	T5	Coarse	0.690888	1381.2	47.7166	-29.3698	7.03299	1.19894	4.65		8.39618	0.867734	0.502715	0.0485901	0.00024427	0.0504824	0.120196	3.4732e-05	312.577	Coarse-Northern	0.034732	0.00690888
44	Eastern	Midwinter_I	K1	Coarse	1.30065	4308.1	46.6292	-29.4448	59.1936	1.10158	4.425		81.4924	1.91391	1.54889	0.7699	0.0119249	2.34524	5.58389	0.000201456	2630.82	Coarse-Eastern	0.201456	0.0130065
45	Eastern	Midwinter_I	K2	Coarse	1.15953	4056.53	45.8452	-29.3628	27.9792	0.866437	4.9		24.3697	1.82486	1.45984	0.324427	0.00473612	1.03142	2.45577	0.000169273	1243.52	Coarse-Eastern	0.169273	0.0115953
46	Eastern	Midwinter_I	K3	Coarse	0.775105	3162.74	47.996	-28.5948	25.7549	0.849808	6.025		17.214	1.50716	1.14214	0.199627	0.00228003	0.610541	1.45367	8.85281e-05	1144.66	Coarse-Eastern	0.0885281	0.00775105
47	Eastern	Midwinter_I	K4	Coarse	0.703122	1918.11	47.5766	-28.0138	11.719	0.882917	6.2		6.574	1.06131	0.696294	0.0823991	0.00057374	0.158097	0.376422	4.8958e-05	520.845	Coarse-Eastern	0.048958	0.00703122
48	Eastern	Midwinter_I	K5	Coarse	0.885747	2283.73	46.0293	-27.5688	40.0318	1.15602	6.025		26.0435	1.1927	0.827683	0.35458	0.0029348	0.785875	1.87113	7.33118e-05	1779.19	Coarse-Eastern	0.0733118	0.00885747
49	Eastern	Midwinter_I	K6	Coarse	0.861278	1293.56	51.3742	-27.6818	96.6218	0.424759	6.925		74.1162	0.836063	0.471044	0.832183	0.00391995	1.20647	2.87256	4.057e-05	4294.3	Coarse-Eastern	0.04057	0.00861278
50	Eastern	Midwinter_I	K7	Coarse	0.742571	418.804	52.6698	-28.1768	28.3994	0.783119	5.675		17.6832	0.518846	0.153827	0.210885	0.0003244	0.0818208	0.194811	1.14228e-05	1262.19	Coarse-Eastern	0.0114228	0.00742571
51	Eastern	Midwinter_I	K8	Coarse	0.906635	3203.41	49.1936	-29.4248	6.04277	1.01003	5.95		3.06491	1.52166	1.15664	0.0547858	0.000633676	0.167572	0.398981	0.000104865	268.568	Coarse-Eastern	0.104865	0.00906635
52	Southeastern	Midwinter_I	S1	Coarse	0.821602	1820.57	48.6693	-29.1358	23.2837	0.387981	6.25		24.4837	1.0262	0.661181	0.1913	0.00126484	0.351344	0.836534	5.43228e-05	1034.83	Coarse-Southeastern	0.0543228	0.00821602
53	Southeastern	Midwinter_I	S2	Coarse					13.1938	0.990526	2.775		17.749								586.393	Coarse-Southeastern
54	Southeastern	Midwinter_I	S3	Coarse	1.21522	5378.44	40.9073	-28.3678	8.19303	1.07056	3.6		6.26756	2.291	1.92598	0.0995631	0.00191757	0.30681	0.730501	0.000234048	364.134	Coarse-Southeastern	0.234048	0.0121522
55	Southeastern	Midwinter_I	S4	Coarse	1.17642	4071.69	48.9316	-28.1698	121.817	0.708612	14		15.62	1.83023	1.46521	1.43308	0.0209977	13.0653	31.1077	0.000172371	5414.1	Coarse-Southeastern	0.172371	0.0117642
56	Southeastern	Midwinter_I	S5	Coarse	0.825702	4178.12	40.3221	-27.7568	37.4892	1.0071	7		21.8597	1.86792	1.5029	0.309549	0.00465222	1.44736	3.44609	0.000124095	1666.19	Coarse-Southeastern	0.124095	0.00825702
57	Southeastern	Midwinter_I	S6	Coarse	0.992872	682.551	48.2772	-29.2088	17.8048	0.74273	5.9		4.43105	0.614704	0.249685	0.176779	0.000441391	0.115742	0.275577	2.47905e-05	791.326	Coarse-Southeastern	0.0247905	0.00992872
58	Southeastern	Midwinter_I	S7	Coarse	1.01024	2006.05	51.9541	-28.7658	16.1654	0.506874	1.125		15.1107	1.09295	0.727927	0.163309	0.00118877	0.0594386	0.14152	7.35382e-05	718.461	Coarse-Southeastern	0.0735382	0.0101024
59	Southern	Midwinter_I	S8	Coarse	0.793332	7669.63	48.9291	-27.8528	34.3502	0.555923	1.4		42.6348	3.08853	2.72351	0.272511	0.00742187	0.461805	1.09954	0.000216065	1526.68	Coarse-Southern	0.216065	0.00793332
60	Southern	Midwinter_I	F1	Coarse	0.604956	6873.69	54.777	-27.2208	30.0328	0.852894	5.35		31.4474	2.81295	2.44793	0.181685	0.00444754	1.05753	2.51792	0.000148089	1334.79	Coarse-Southern	0.148089	0.00604956
61	Southern	Midwinter_I	F2	Coarse	0.465388	8553.44	51.2166	-27.2828	18.9393	0.792435	4		29.5407	3.3927	3.02768	0.088141	0.00266863	0.474423	1.12958	0.000140905	841.745	Coarse-Southern	0.140905	0.00465388
62	Southern	Midwinter_I	F3	Coarse	0.498205	12220.3	54.2017	-26.2478	24.2017	0.45135	5.3		43.1457	4.63456	4.26954	0.120574	0.00514794	1.21263	2.88721	0.00021271	1075.63	Coarse-Southern	0.21271	0.00498205
63	Southern	Midwinter_I	F4	Coarse	0.527659	4935.76	47.6411	-26.9428	8.75552	1.11475	2.35		14.252	2.13539	1.77037	0.0461992	0.000817898	0.0854249	0.203393	9.34152e-05	389.134	Coarse-Southern	0.0934152	0.00527659
64	Southern	Midwinter_I	F5	Coarse	0.290421	6371.31	51.8758	-25.7928	5.16149	0.252148	2.725		33.9613	2.63821	2.27319	0.0149901	0.000340752	0.0412689	0.0982593	6.60182e-05	229.4	Coarse-Southern	0.0660182	0.00290421
65	Southern	Midwinter_I	F6	Coarse	0.80476	2790.94	49.9406	-27.8288	8.65348	0.535721	3.65		17.6094	1.3744	1.00938	0.0696397	0.000702927	0.11403	0.271501	8.12306e-05	384.599	Coarse-Southern	0.0812306	0.0080476
66	Southern	Midwinter_I	F7	Coarse	0.429589	7275.96	45.3757	-28.0518	25.8108	0.951573	2.90833		33.6782	2.95242	2.5874	0.11088	0.00286892	0.370835	0.882939	0.000111152	1147.15	Coarse-Southern	0.111152	0.00429589
67	Southern	Midwinter_I	F8	Coarse	0.524568	4210.42	44.2172	-25.8818	71.7697	1.01218	7.3		8.55465	1.87935	1.51433	0.376481	0.00570118	1.84972	4.40409	7.94371e-05	3189.76	Coarse-Southern	0.0794371	0.00524568
68	Northern	Midwinter_II	Y1	Coarse	1.23907	542.293	44.8205	-28.5098	11.4577	0.462506	4.975		15.9408	0.563751	0.198732	0.141969	0.000282138	0.0623838	0.148533	2.46243e-05	509.232	Coarse-Northern	0.0246243	0.0123907
69	Northern	Midwinter_II	Y2	Coarse	0.938615	845.473	45.4521	-29.3998	21.6121	0.376303	2.725		58.3131	0.673825	0.308806	0.202855	0.000626426	0.0758672	0.180636	2.8985e-05	960.539	Coarse-Northern	0.028985	0.00938615
70	Northern	Midwinter_II	Y3	Coarse	1.15428	1482.33	39.4483	-28.5498	9.84201	0.479963	5.25		11.5894	0.904253	0.539234	0.113604	0.000612591	0.142938	0.340329	6.22425e-05	437.423	Coarse-Northern	0.0622425	0.0115428
71	Northern	Midwinter_II	Y4	Coarse	0.741015	2504.29	43.7152	-28.6228	4.3355	0.352665	5.85		4.50419	1.2718	0.906776	0.0321267	0.000291317	0.0757425	0.180339	6.71935e-05	192.689	Coarse-Northern	0.0671935	0.00741015
72	Northern	Midwinter_II	Y5	Coarse	1.06194	3419.44	48.4222	-29.8128	4.97895	0.706327	7.275		2.70041	1.59861	1.2336	0.0528733	0.000652243	0.210892	0.502124	0.000131	221.287	Coarse-Northern	0.131	0.0106194
73	Northern	Midwinter_II	T1	Coarse	0.899527	588.22	47.8564	-28.4958	8.95795	1.26914	4.475		9.1582	0.580441	0.215422	0.0805792	0.000173585	0.0345242	0.0822004	1.93778e-05	398.131	Coarse-Northern	0.0193778	0.00899527
74	Northern	Midwinter_II	T2	Coarse	0.930802	214.644	50.7958	-29.3528	4.86083	0.789886	2.725		13.3515	0.444518	0.0794995	0.0452447	3.59693e-05	0.00435628	0.0103721	7.39983e-06	216.037	Coarse-Northern	0.00739983	0.00930802
75	Northern	Midwinter_II	T3	Coarse	0.801632	828.866	45.7757	-28.7558	6.34065	0.95828	4.25		7.54685	0.667802	0.302783	0.0508287	0.0001539	0.0290701	0.0692144	2.4272e-05	281.807	Coarse-Northern	0.024272	0.00801632
76	Northern	Midwinter_II	T4	Coarse	0.832803	543.089	50.8849	-26.8918	9.42888	1.0498	4.775		10.2257	0.56404	0.199021	0.078524	0.000156279	0.033166	0.0789666	1.65745e-05	419.062	Coarse-Northern	0.0165745	0.00832803
77	Northern	Midwinter_II	T5	Coarse	0.709314	1857.12	47.8537	-28.4708	5.14315	1.19894	4.65		6.14003	1.03936	0.674343	0.0364811	0.000246007	0.0508415	0.121051	4.78321e-05	228.584	Coarse-Northern	0.0478321	0.00709314
78	Eastern	Midwinter_II	K1	Coarse	1.46007	2540.34	45.2651	-29.5278	16.7984	1.10158	4.425		23.1265	1.28471	0.919692	0.245268	0.00225571	0.443624	1.05625	0.000134282	746.594	Coarse-Eastern	0.134282	0.0146007
79	Eastern	Midwinter_II	K2	Coarse	1.30521	2826.31	43.1092	-29.4548	14.6482	0.866437	4.9		12.7585	1.38704	1.02202	0.19119	0.00195401	0.425539	1.01319	0.000133396	651.031	Coarse-Eastern	0.133396	0.0130521
80	Eastern	Midwinter_II	K3	Coarse	0.755705	4181.27	45.7885	-28.5228	47.6478	0.849808	6.025		31.8468	1.86903	1.50402	0.360077	0.00541561	1.45018	3.45281	0.000113659	2117.68	Coarse-Eastern	0.113659	0.00755705
81	Eastern	Midwinter_II	K4	Coarse	0.580702	2727.16	50.2657	-27.6868	1.69889	0.882917	6.2		0.953022	1.35158	0.986566	0.00986547	9.73294e-05	0.0268196	0.0638563	5.729e-05	75.5061	Coarse-Eastern	0.05729	0.00580702
82	Eastern	Midwinter_II	K5	Coarse	0.662985	1477.22	48.1598	-27.7558	25.1151	1.15602	6.025		16.3391	0.90241	0.537391	0.166509	0.000894805	0.239609	0.570497	3.56282e-05	1116.22	Coarse-Eastern	0.0356282	0.00662985
83	Eastern	Midwinter_II	K6	Coarse	0.649768	1373.81	54.0127	-26.6498	40.8608	0.424759	6.925		31.3433	0.865063	0.500044	0.2655	0.00132762	0.408612	0.972885	3.24913e-05	1816.03	Coarse-Eastern	0.0324913	0.00649768
84	Eastern	Midwinter_II	K7	Coarse	0.793884	5784.66	49.9993	-28.2078	7.01372	0.783119	5.675		4.36717	2.43335	2.06833	0.0556808	0.00115166	0.290475	0.691608	0.000164202	311.721	Coarse-Eastern	0.164202	0.00793884
85	Eastern	Midwinter_II	K8	Coarse	0.913508	1392.1	46.2609	-29.3848	4.14976	1.01003	5.95		2.10477	0.87167	0.506651	0.0379084	0.000192063	0.0507901	0.120929	4.6283e-05	184.434	Coarse-Eastern	0.046283	0.00913508
86	Southeastern	Midwinter_II	S1	Coarse	0.631873	13233.1	46.617	-27.5828	11.6535	0.387981	6.25		12.254	4.97197	4.60695	0.0736352	0.00339233	0.942315	2.24361	0.000291101	517.932	Coarse-Southeastern	0.291101	0.00631873
87	Southeastern	Midwinter_II	S2	Coarse	0.76538	3450.07	48.3817	-28.9798	16.103	0.990526	2.775		21.6625	1.60952	1.2445	0.123249	0.00153384	0.189173	0.450412	9.52514e-05	715.69	Coarse-Southeastern	0.0952514	0.0076538
88	Southeastern	Midwinter_II	S3	Coarse	1.05211	1284.41	44.436	-28.2058	4.44099	1.07056	3.6		3.39731	0.832757	0.467738	0.046724	0.000218546	0.0349674	0.0832556	4.92111e-05	197.378	Coarse-Southeastern	0.0492111	0.0105211
89	Southeastern	Midwinter_II	S4	Coarse	0.543596	6082.95	50.8516	-26.2338	20.6807	0.708612	14		2.65177	2.53762	2.1726	0.112419	0.00244242	1.51973	3.6184	0.000118102	919.141	Coarse-Southeastern	0.118102	0.00543596
90	Southeastern	Midwinter_II	S5	Coarse	0.656255	1045.25	47.9688	-26.6378	39.2005	1.0071	7		22.8575	0.746222	0.381203	0.257255	0.000980665	0.305096	0.726418	2.50167e-05	1742.24	Coarse-Southeastern	0.0250167	0.00656255
91	Southeastern	Midwinter_II	S6	Coarse	0.674481	6310.6	48.3975	-28.6998	84.3887	0.74273	5.9		21.0016	2.61705	2.25203	0.569186	0.0128182	3.36122	8.00291	0.000151895	3750.61	Coarse-Southeastern	0.151895	0.00674481
92	Southeastern	Midwinter_II	S7	Coarse	0.684694	3051.33	47.9262	-27.6488	24.2422	0.506874	1.125		22.6607	1.46742	1.1024	0.165985	0.00182981	0.0914907	0.217835	7.54804e-05	1077.43	Coarse-Southeastern	0.0754804	0.00684694
93	Southeastern	Midwinter_II	S8	Coarse	0.623305	259.8	49.1034	-27.1358	22.5932	0.555923	1.4		28.0423	0.460968	0.0959487	0.140825	0.00013512	0.00840744	0.0200177	5.98053e-06	1004.14	Coarse-Southeastern	0.00598053	0.00623305
94	Southern	Midwinter_II	F1	Coarse	0.513782	16072	51.7806	-27.2168	9.96172	0.852894	5.35		10.4309	5.90508	5.54006	0.0511815	0.00283549	0.674216	1.60528	0.000284638	442.743	Coarse-Southern	0.284638	0.00513782
95	Southern	Midwinter_II	F2	Coarse	0.381	636.019	54.266	-27.5258	5.04343	0.792435	4		7.86655	0.597805	0.232786	0.0192155	4.4731e-05	0.00795217	0.0189337	8.86916e-06	224.152	Coarse-Southern	0.00886916	0.00381
96	Southern	Midwinter_II	F3	Coarse	0.418384	4331.61	54.734	-25.6048	29.5961	0.45135	5.3		52.7626	1.92223	1.55721	0.123825	0.00192822	0.454202	1.08143	6.51511e-05	1315.38	Coarse-Southern	0.0651511	0.00418384
97	Southern	Midwinter_II	F4	Coarse	0.407511	13471	47.0293	-28.0118	12.2213	1.11475	2.35		19.8935	5.05087	4.68585	0.0498031	0.0023337	0.243742	0.580338	0.000190954	543.169	Coarse-Southern	0.190954	0.00407511
98	Southern	Midwinter_II	F5	Coarse	0.246227	7297.88	55.629	-26.3628	2.49221	0.252148	2.725		16.3981	2.96001	2.59499	0.00613649	0.000159241	0.0192859	0.0459188	6.38956e-05	110.765	Coarse-Southern	0.0638956	0.00246227
99	Southern	Midwinter_II	F6	Coarse	0.881069	585.254	49.9233	-29.3538	7.56659	0.535721	3.65		15.3977	0.579363	0.214344	0.0666669	0.000142897	0.023181	0.0551928	1.88852e-05	336.293	Coarse-Southern	0.0188852	0.00881069
100	Southern	Midwinter_II	F7	Coarse	0.50278	6471.48	50.7513	-26.6528	3.24967	0.951573	2.90833		4.2402	2.6731	2.30808	0.0163387	0.00037711	0.048745	0.116059	0.000116046	144.43	Coarse-Southern	0.116046	0.0050278
101	Southern	Midwinter_II	F8	Coarse	0.68032	1243.47	50.6553	-26.6148	57.7566	1.01218	7.3		6.88435	0.817955	0.452936	0.39293	0.00177972	0.57742	1.37481	3.08141e-05	2566.96	Coarse-Southern	0.0308141	0.0068032
102	Northern	Late_Winter_C	Y1	Coarse	0.987264	10250.1	48.501	-30.085	16.0107	0.462506	4.975		22.2752	3.9713	3.60628	0.158068	0.00570037	1.26041	3.00099	0.000356035	711.586	Coarse-Northern	0.356035	0.00987264
103	Northern	Late_Winter_C	Y2	Coarse	1.5766	2295.1	45.2933	-27.42	10.2325	0.376303	2.725		27.6089	1.19678	0.831762	0.161325	0.00134184	0.162512	0.386933	0.000131136	454.777	Coarse-Northern	0.131136	0.015766
104	Northern	Late_Winter_C	Y3	Coarse	0.958849	239.094	47.3942	-29.205	4.48157	0.479963	5.25		5.27724	0.453426	0.0884066	0.0429714	3.79896e-05	0.00886423	0.0211053	8.47685e-06	199.181	Coarse-Northern	0.00847685	0.00958849
105	Northern	Late_Winter_C	Y4	Coarse	0.560646	3328.18	48.3565	-29.32	1.70847	0.352665	5.85		1.77494	1.56612	1.2011	0.00957845	0.000115047	0.0299122	0.0712196	6.73394e-05	75.9318	Coarse-Northern	0.0673394	0.00560646
106	Northern	Late_Winter_C	Y5	Coarse	0.832882	1056.81	48.2756	-28.756	6.67663	0.706327	7.275		3.62118	0.750411	0.385392	0.0556085	0.00021431	0.0692937	0.164985	3.20986e-05	296.739	Coarse-Northern	0.0320986	0.00832882
107	Northern	Late_Winter_WW	T1	Coarse	1.1666	1174.16	46.1102	-29.721	1.32961	1.26914	4.475		1.35934	0.792883	0.427864	0.0155113	6.63671e-05	0.0131997	0.0314278	4.99145e-05	59.094	Coarse-Northern	0.0499145	0.011666
108	Northern	Late_Winter_WW	T2	Coarse	0.790237	2566.5	44.6109	-29.712	1.21146	0.789886	2.725		3.3276	1.29408	0.92906	0.00957342	8.89428e-05	0.010772	0.0256475	7.34177e-05	53.8428	Coarse-Northern	0.0734177	0.00790237
109	Northern	Late_Winter_WW	T3	Coarse	0.68076	3113.74	49.0509	-28.835	13.5364	0.95828	4.25		16.1115	1.48968	1.12467	0.0921505	0.00103638	0.195762	0.466099	7.65627e-05	601.618	Coarse-Northern	0.0765627	0.0068076
110	Northern	Late_Winter_WW	T4	Coarse	0.728554	2971.59	51.1704	-28.755	5.3048	1.0498	4.775		5.75307	1.43895	1.07393	0.0386483	0.000415056	0.088084	0.209724	7.82415e-05	235.769	Coarse-Northern	0.0782415	0.00728554
111	Northern	Late_Winter_WW	T5	Coarse	0.849661	3251.95	50.3455	-29.475	17.1933	1.19894	4.65		20.5259	1.53896	1.17394	0.146085	0.00171496	0.354424	0.843867	9.97453e-05	764.149	Coarse-Northern	0.0997453	0.00849661
112	Eastern	Late_Winter_C	K1	Coarse	1.21479	3242.54	49.5661	-29.445	23.7756	1.10158	4.425		32.732	1.53561	1.17059	0.288824	0.00338094	0.664918	1.58314	0.000142202	1056.69	Coarse-Eastern	0.142202	0.0121479
113	Eastern	Late_Winter_C	K2	Coarse	0.814996	8208.57	49.3151	-28.209	36.0841	0.866437	4.9		31.429	3.27424	2.90922	0.294084	0.00855554	1.86321	4.4362	0.0002371	1603.74	Coarse-Eastern	0.2371	0.00814996
114	Eastern	Late_Winter_C	K3	Coarse	0.873387	2235.99	49.7692	-26.459	30.5908	0.849808	6.025		20.4462	1.17557	0.810548	0.267176	0.00216559	0.579896	1.3807	7.07922e-05	1359.59	Coarse-Eastern	0.0707922	0.00873387
115	Eastern	Late_Winter_C	K4	Coarse	0.630298	1614.95	51.4866	-29.142	8.07482	0.882917	6.2		4.52972	0.952103	0.587084	0.0508954	0.000298799	0.0823357	0.196037	3.70038e-05	358.881	Coarse-Eastern	0.0370038	0.00630298
116	Eastern	Late_Winter_WW	K5	Coarse	1.15281	9271.3	45.1484	-29.205	8.44576	1.15602	6.025		5.49455	3.63836	3.27334	0.0973632	0.00318702	0.853414	2.03194	0.000377352	375.367	Coarse-Eastern	0.377352	0.0115281
117	Eastern	Late_Winter_WW	K6	Coarse	0.853643	6174.35	48.9236	-27.121	1.17675	0.424759	6.925		0.902659	2.56953	2.20451	0.0100453	0.000221449	0.0681571	0.162279	0.000188186	52.3002	Coarse-Eastern	0.188186	0.00853643
118	Eastern	Late_Winter_WW	K7	Coarse	0.488513	2930.15	39.9298	-27.235	2.34568	0.783119	5.675		1.46057	1.42415	1.05913	0.011459	0.000121365	0.030611	0.0728834	5.17398e-05	104.253	Coarse-Eastern	0.0517398	0.00488513
119	Eastern	Late_Winter_WW	K8	Coarse	0.727578	1204.75	51.2492	-29.324	11.7343	1.01003	5.95		5.95167	0.803951	0.438932	0.0853761	0.000374743	0.0990987	0.235949	3.19357e-05	521.524	Coarse-Eastern	0.0319357	0.00727578
120	Southeastern	Late_Winter_C	S1	Coarse	1.12686	1706.05	51.209	-28.589	23.8531	0.387981	6.25		25.0823	0.984948	0.619929	0.268791	0.00166631	0.462865	1.10206	6.98573e-05	1060.14	Coarse-Southeastern	0.0698573	0.0112686
121	Southeastern	Late_Winter_C	S2	Coarse	0.881182	1202.36	47.9286	-27.021	13.0102	0.990526	2.775		17.5019	0.803086	0.438067	0.114643	0.000502214	0.0619397	0.147475	3.86016e-05	578.23	Coarse-Southeastern	0.0386016	0.00881182
122	Southeastern	Late_Winter_C	S3	Coarse	0.926407	4620.22	48.2206	-27.55	3.55558	1.07056	3.6		2.71998	2.02417	1.65916	0.0329392	0.000546512	0.087442	0.208195	0.000153705	158.026	Coarse-Southeastern	0.153705	0.00926407
123	Southeastern	Late_Winter_C	S4	Coarse	0.8205	3143.44	47.3668	-29.276	110.854	0.708612	14		14.2143	1.50028	1.13526	0.909561	0.0103259	6.42498	15.2976	9.31479e-05	4926.87	Coarse-Southeastern	0.0931479	0.008205
124	Southeastern	Late_Winter_WW	S5	Coarse	0.847041	8600.74	46.3211	-28.806	19.8923	1.0071	7		11.5991	3.40892	3.04391	0.168496	0.00512886	1.59565	3.79916	0.000257831	884.104	Coarse-Southeastern	0.257831	0.00847041
125	Southeastern	Late_Winter_WW	S6	Coarse	1.07395	2046.96	47.3587	-27.612	3.71564	0.74273	5.9		0.924702	1.10765	0.742636	0.0399042	0.000296343	0.0777077	0.185018	7.97556e-05	165.139	Coarse-Southeastern	0.0797556	0.0107395
126	Southeastern	Late_Winter_WW	S7	Coarse	0.789596	2736.94	50.8894	-29.289	11.9894	0.506874	1.125		11.2072	1.35508	0.990066	0.094668	0.000937275	0.0468638	0.11158	7.81752e-05	532.863	Coarse-Southeastern	0.0781752	0.00789596
127	Southeastern	Late_Winter_WW	S8	Coarse	0.708222	5059.4	49.7576	-27.21	24.7891	0.555923	1.4		30.7677	2.1789	1.81388	0.175562	0.00318449	0.198146	0.471776	0.000128463	1101.74	Coarse-Southeastern	0.128463	0.00708222
128	Southern	Late_Winter_C	F1	Coarse	0.399745	9082.97	52.4009	-27.088	12.1355	0.852894	5.35		12.7071	3.57403	3.20901	0.0485109	0.00155672	0.370153	0.881317	0.000128279	539.354	Coarse-Southern	0.128279	0.00399745
129	Southern	Late_Winter_C	F2	Coarse	0.55144	8348.89	51.6753	-24.954	14.8179	0.792435	4		23.1124	3.32247	2.95745	0.0817119	0.00241659	0.429616	1.0229	0.000163086	658.574	Coarse-Southern	0.163086	0.0055144
130	Southern	Late_Winter_C	F3	Coarse	0.581401	4558.01	50.1206	-26.804	24.5885	0.45135	5.3		43.8353	2.00222	1.6372	0.142958	0.0023405	0.551318	1.31266	9.51869e-05	1092.82	Coarse-Southern	0.0951869	0.00581401
131	Southern	Late_Winter_C	F4	Coarse	0.765924	1525.03	52.7826	-27.601	5.47646	1.11475	2.35		8.91444	0.919666	0.554647	0.0419455	0.00023265	0.024299	0.0578547	4.24818e-05	243.398	Coarse-Southern	0.0424818	0.00765924
132	Southern	Late_Winter_WW	F5	Coarse	0.365783	7856.87	50.4269	-26.872	0.623971	0.252148	2.725		4.10558	3.15312	2.78811	0.00228238	6.36352e-05	0.00770693	0.0183498	0.000101984	27.732	Coarse-Southern	0.101984	0.00365783
133	Southern	Late_Winter_WW	F6	Coarse	0.754973	5569.51	48.7749	-27.935	4.6952	0.535721	3.65		9.55451	2.35801	1.99299	0.0354475	0.000706463	0.114604	0.272867	0.000150465	208.675	Coarse-Southern	0.150465	0.00754973
134	Southern	Late_Winter_WW	F7	Coarse	0.353897	758.502	52.2531	-26.226	77.1848	0.951573	2.90833		100.711	0.642273	0.277254	0.273155	0.000757333	0.0978923	0.233077	9.81195e-06	3430.43	Coarse-Southern	0.00981195	0.00353897
135	Southern	Late_Winter_WW	F8	Coarse	0.498975	5173.08	50.6127	-26.506	20.3281	1.01218	7.3		2.42302	2.21887	1.85386	0.101432	0.0018804	0.610086	1.45259	9.25027e-05	903.471	Coarse-Southern	0.0925027	0.00498975
136	Northern	Early_Winter	Y1	Fine	1.24862	750.782	44.0689	-28.9616	4.02508	3.25489	4.975		4.52844	0.639472	0.274453	0.050258	0.000137935	0.0304989	0.0726164	3.42688e-05	178.892	Fine-Northern	0.0342688	0.0124862
137	Northern	Early_Winter	Y2	Fine	1.22027	2596.44	43.7447	-29.0336	2.12718	2.47659	2.725		6.68225	1.3048	0.939782	0.0259575	0.000243944	0.0295443	0.0703435	0.000114679	94.5415	Fine-Northern	0.114679	0.0122027
138	Northern	Early_Winter	Y3	Fine	1.2969	1834.74	38.1952	-28.2106	11.9055	7.18525	5.25		8.46095	1.0313	0.666285	0.154403	0.00102877	0.240045	0.571537	8.64107e-05	529.135	Fine-Northern	0.0864107	0.012969
139	Northern	Early_Winter	Y4	Fine	1.2196	1001.4	41.0235	-28.4626	6.60395	4.55234	5.85		4.72947	0.73034	0.365321	0.0805419	0.000294237	0.0765015	0.182147	4.45546e-05	293.509	Fine-Northern	0.0445546	0.012196
140	Northern	Early_Winter	Y5	Fine	1.16743	1254.43	35.9745	-28.1146	19.6964	18.6644	7.275		10.1229	0.821917	0.456898	0.229942	0.0010506	0.339693	0.808794	5.33396e-05	875.396	Fine-Northern	0.0533396	0.0116743
141	Northern	Early_Winter	T1	Fine	0.928031	2201.18	36.9441	-28.5446	5.05357	5.18522	4.475		5.30114	1.16307	0.798049	0.0468987	0.000374274	0.074439	0.177236	7.40614e-05	224.603	Fine-Northern	0.0740614	0.00928031
142	Northern	Early_Winter	T2	Fine	0.923607	1008.99	34.2077	-28.9726	4.82083	3.55002	2.725		9.75104	0.733092	0.368073	0.0445255	0.000163887	0.0198485	0.0472583	3.39955e-05	214.259	Fine-Northern	0.0339955	0.00923607
143	Northern	Early_Winter	T3	Fine	0.852102	4065.5	38.9181	-27.1516	3.22558	3.42231	4.25		4.07334	1.82804	1.46302	0.0274852	0.000402114	0.0759549	0.180845	0.000124664	143.359	Fine-Northern	0.124664	0.00852102
144	Northern	Early_Winter	T4	Fine	0.890924	367.637	38.8257	-28.0056	5.6751	7.25242	4.775		6.70619	0.500228	0.135209	0.0505608	6.83629e-05	0.0145081	0.0345432	1.20461e-05	252.227	Fine-Northern	0.0120461	0.00890924
145	Northern	Early_Winter	T5	Fine	0.724338	3693.3	36.5656	-28.5306	12.2814	13.5996	4.65		7.86528	1.696	1.33098	0.0889591	0.00118403	0.244699	0.582616	9.64078e-05	545.841	Fine-Northern	0.0964078	0.00724338
146	Eastern	Early_Winter	K1	Fine	1.25346	6239.69	35.1336	-27.8176		7.10534	4.425		16.2356	2.59232	2.2273							Fine-Eastern	0.279184	0.0125346
147	Eastern	Early_Winter	K2	Fine	1.40951	8907.13	39.6628	-28.3266	8.33925	8.12091	4.9		7.07326	3.51389	3.14887	0.117543	0.00370127	0.806055	1.91918	0.000443838	370.633	Fine-Eastern	0.443838	0.0140951
148	Eastern	Early_Winter	K3	Fine	0.773521	5429.27	47.0415	-27.9426	5.32321	4.99236	6.025		3.33679	2.30883	1.94381	0.0411762	0.000800388	0.214326	0.5103	0.000150358	236.587	Fine-Eastern	0.150358	0.00773521
149	Eastern	Early_Winter	K4	Fine	0.683003	5357.76	48.6176	-27.5846	8.00113	7.65418	6.2		4.29375	2.28374	1.91872	0.054648	0.00104854	0.288931	0.687932	0.000131049	355.606	Fine-Eastern	0.131049	0.00683003
150	Eastern	Early_Winter	K5	Fine	0.671129	2171.71	50.3107	-27.1606	7.00335	6.40785	6.025		4.16875	1.15248	0.787466	0.0470015	0.000370121	0.0991102	0.235977	5.28491e-05	311.26	Fine-Eastern	0.0528491	0.00671129
151	Eastern	Early_Winter	K6	Fine	1.0177	1871.12	49.588	-26.4586	5.02268	3.28031	6.925		2.51625	1.0444	0.679382	0.0511159	0.000347272	0.106883	0.254482	6.91408e-05	223.23	Fine-Eastern	0.0691408	0.010177
152	Eastern	Early_Winter	K7	Fine	0.912624	2906.36	47.6971	-28.3686	6.11313	8.23693	5.675		5.12881	1.41565	1.05063	0.0557899	0.000586145	0.147839	0.351997	9.5883e-05	271.695	Fine-Eastern	0.095883	0.00912624
153	Eastern	Early_Winter	K8	Fine	0.870609	3618.45	39.446	-29.1876	12.3373	11.0448	5.95		5.60197	1.6694	1.30438	0.10741	0.00140104	0.370497	0.882135	0.000113561	548.327	Fine-Eastern	0.113561	0.00870609
154	Southeastern	Early_Winter	S1	Fine	0.740047	808.422	47.0258	-26.4526	11.4786	6.65173	6.25		6.99452	0.660386	0.295367	0.0849473	0.000250906	0.0696961	0.165943	2.18585e-05	510.162	Fine-Southeastern	0.0218585	0.00740047
155	Southeastern	Early_Winter	S2	Fine	0.786068	1010.89	32.9565	-28.1816	7.5309	6.89384	2.775		9.27391	0.733777	0.368758	0.059198	0.000218298	0.0269234	0.0641033	2.89869e-05	334.707	Fine-Southeastern	0.0289869	0.00786068
156	Southeastern	Early_Winter	S3	Fine	1.2021	1511.35	42.5238	-28.6946	3.75914	4.06142	3.6		3.10694	0.914728	0.549709	0.0451887	0.000248407	0.0397451	0.0946311	6.60807e-05	167.073	Fine-Southeastern	0.0660807	0.012021
157	Southeastern	Early_Winter	S4	Fine	0.999091	1112.71	46.785	-25.8346	20.1969	15.6558	4.20833		6.45846	0.770649	0.40563	0.201786	0.000818503	0.15309	0.364501	4.05261e-05	897.642	Fine-Southeastern	0.0405261	0.00999091
158	Southeastern	Early_Winter	S5	Fine	0.692316	924.399	37.3806	-27.0936	3.69679	3.69665	7		2.15549	0.70244	0.337421	0.0255935	8.63578e-05	0.0268669	0.0639687	2.33602e-05	164.302	Fine-Southeastern	0.0233602	0.00692316
159	Southeastern	Early_Winter	S6	Fine	0.90631	2805.65	46.8029	-28.0246	5.41167	10.4936	5.9		2.61152	1.37966	1.01464	0.0490465	0.000497644	0.130493	0.310699	9.19576e-05	240.519	Fine-Southeastern	0.0919576	0.0090631
160	Southeastern	Early_Winter	S7	Fine	0.876391	371.937	49.6147	-28.2256	3.22271	1.94204	4.95556		1.81534	0.501793	0.136774	0.0282436	3.86299e-05	0.00850813	0.0202574	1.19868e-05	143.232	Fine-Southeastern	0.0119868	0.00876391
161	Southeastern	Early_Winter	S8	Fine	0.863895	3393.17	50.3039	-27.7216	4.14873	2.65182	4.73981		3.29138	1.58926	1.22424	0.0358407	0.000438778	0.0924322	0.220077	0.000105762	184.388	Fine-Southeastern	0.105762	0.00863895
162	Southern	Early_Winter	F1	Fine	0.49178	1054.65	51.5528	-26.9786	2.84631	1.68537	5.35		1.76475	0.749628	0.384609	0.0139976	5.3836e-05	0.012801	0.0304786	1.89143e-05	126.503	Fine-Southern	0.0189143	0.0049178
163	Southern	Early_Winter	F2	Fine	0.510051	10207.8	50.8642	-27.1496	1.26742	1.69571	4		2.6449	3.95694	3.59193	0.00646451	0.0002322	0.0412801	0.0982859	0.000183206	56.33	Fine-Southern	0.183206	0.00510051
164	Southern	Early_Winter	F3	Fine	0.77748	5420.94	50.5571	-25.8746		1.32778	5.3		2.52074	2.30591	1.94089							Fine-Southern	0.1509	0.0077748
165	Southern	Early_Winter	F4	Fine					0.278092	0.274219	2.35		0.446367								12.3596	Fine-Southern
166	Southern	Early_Winter	F5	Fine	0.305558	5762.56	54.7241	-26.1796	0.122536	0.363198	2.725		2.38975	2.42562	2.0606	0.000374419	7.71528e-06	0.000934406	0.00222478	6.29632e-05	5.44606	Fine-Southern	0.0629632	0.00305558
167	Southern	Early_Winter	F6	Fine	0.777241	2372.66	47.2892	-26.8246	2.97005	2.62041	3.65		5.33242	1.22461	0.859587	0.0230844	0.000198431	0.0321898	0.0766425	6.68106e-05	132.002	Fine-Southern	0.0668106	0.00777241
168	Southern	Early_Winter	F7	Fine	0.783457	3823.05	49.4223	-26.6696	1.59986	1.95145	2.90833		2.54628	1.74207	1.37705	0.0125342	0.000172602	0.0223105	0.0531202	0.000107886	71.105	Fine-Southern	0.107886	0.00783457
169	Southern	Early_Winter	F8	Fine					3.46047	5.06362	7.3		0.603563								153.799	Fine-Southern
170	Northern	Midwinter_I	Y1	Fine	1.47968	151.767	45.004	-29.2246	2.14861	3.76891	4.975		5.24357	0.421604	0.0565854	0.0317925	1.79899e-05	0.00397777	0.00947088	8.37283e-06	95.4936	Fine-Northern	0.00837283	0.0147968
171	Northern	Midwinter_I	Y2	Fine	1.0341	1801.03	47.2953	-29.0696	1.27888	1.04535	2.725		2.82052	1.01917	0.654146	0.0132248	8.65098e-05	0.0104773	0.0249459	6.76451e-05	56.839	Fine-Northern	0.0676451	0.010341
172	Northern	Midwinter_I	Y3	Fine	1.06088	3490.23	46.2513	-28.7916	3.00595	3.55104	5.25		4.1815	1.62381	1.25879	0.0318897	0.000401423	0.0936654	0.223013	0.000133543	133.598	Fine-Northern	0.133543	0.0106088
173	Northern	Midwinter_I	Y4	Fine	0.943984	214.017	45.3223	-28.6876	0.703948	0.804904	5.85		0.836221	0.44429	0.0792708	0.00664516	5.26767e-06	0.00136959	0.00326094	7.48303e-06	31.2866	Fine-Northern	0.00748303	0.00943984
174	Northern	Midwinter_I	Y5	Fine	0.976705	1456.99	45.1508	-28.8456	4.16502	5.31613	7.275		2.88329	0.895106	0.530087	0.0406799	0.000215639	0.0697232	0.166008	5.17738e-05	185.112	Fine-Northern	0.0517738	0.00976705
175	Northern	Midwinter_I	T1	Fine	1.18167	861.945	45.4271	-28.7186	2.01593	2.08036	4.475		2.12687	0.679798	0.314779	0.0238216	7.49855e-05	0.0149138	0.035509	3.71965e-05	89.5969	Fine-Northern	0.0371965	0.0118167
176	Northern	Midwinter_I	T2	Fine	1.04145	610.976	46.9857	-28.3076	0.662753	1.15795	2.725		3.1806	0.588708	0.223689	0.00690226	1.54396e-05	0.00186991	0.00445217	2.32962e-05	29.4557	Fine-Northern	0.0232962	0.0104145
177	Northern	Midwinter_I	T3	Fine					0.332202	0.44078	4.25		0.524631								14.7645	Fine-Northern
178	Northern	Midwinter_I	T4	Fine	0.906804	806.883	47.8009	-28.2018		2.24881	4.775		3.01304	0.659828	0.294809							Fine-Northern	0.0267334	0.00906804
179	Northern	Midwinter_I	T5	Fine	0.633837	5821.83	47.679	-27.7968	2.24582	2.52385	4.65		1.55675	2.44636	2.08134	0.0142348	0.000296275	0.0612301	0.145786	0.000131923	99.8141	Fine-Northern	0.131923	0.00633837
180	Eastern	Midwinter_I	K1	Fine	1.17779	20226	44.0492	-27.5648	1.0996	1.13077	4.425		3.48059	7.23794	6.87292	0.012951	0.000890114	0.175056	0.416799	0.000809489	48.8711	Fine-Eastern	0.809489	0.0117779
181	Eastern	Midwinter_I	K2	Fine	0.633414	18301.6	22.827	-28.7248	3.35979	3.99611	4.9		1.42855	6.62519	6.26017	0.0212813	0.00133225	0.290134	0.690796	0.000396528	149.324	Fine-Eastern	0.396528	0.00633414
182	Eastern	Midwinter_I	K3	Fine	0.635422	8760.89	51.7595	-28.0828	1.7065	2.13733	6.025		0.902466	3.46382	3.0988	0.0108435	0.000336017	0.0899778	0.214233	0.000196904	75.8443	Fine-Eastern	0.196904	0.00635422
183	Eastern	Midwinter_I	K4	Fine					1.11255	1.60876	6.2		3.5138								49.4465	Fine-Eastern
184	Eastern	Midwinter_I	K5	Fine	0.867134	8035.45	50.4785	-27.1998	7.30774	5.40112	6.025		3.81358	3.21466	2.84964	0.0633679	0.00180576	0.483541	1.15129	0.000247102	324.788	Fine-Eastern	0.247102	0.00867134
185	Eastern	Midwinter_I	K6	Fine	1.17698	949.24	51.09	-26.2528	2.40967	4.97159	6.925		1.90255	0.711443	0.346424	0.0283614	9.82507e-05	0.0302394	0.0719985	4.07735e-05	107.096	Fine-Eastern	0.0407735	0.0117698
186	Eastern	Midwinter_I	K7	Fine	0.865272	1365.86	47.0632	-28.1668	3.29932	3.05552	5.675		1.28726	0.86219	0.497171	0.0285481	0.000141933	0.0357986	0.0852348	4.30188e-05	146.636	Fine-Eastern	0.0430188	0.00865272
187	Eastern	Midwinter_I	K8	Fine	0.981053	5626.56	45.4989	-28.5088	2.40777	2.53796	5.95		3.9451	2.378	2.01298	0.0236215	0.000475496	0.125742	0.299386	0.000197484	107.012	Fine-Eastern	0.197484	0.00981053
188	Southeastern	Midwinter_I	S1	Fine	0.759101	5806.46	56.7299	-26.9398	4.01328	3.75175	6.25		1.51331	2.44098	2.07596	0.0304649	0.000632439	0.175677	0.418279	0.000157586	178.368	Fine-Southeastern	0.157586	0.00759101
189	Southeastern	Midwinter_I	S2	Fine	0.734275	20502.7	40.482	-28.0888	1.10408	1.12493	2.775		1.43977	7.32537	6.96035	0.00810701	0.000564277	0.0695941	0.1657	0.000511082	49.0704	Fine-Southeastern	0.511082	0.00734275
190	Southeastern	Midwinter_I	S3	Fine	1.14057	4985.61	47.7472	-28.1688	1.57045	1.88208	3.6		1.28067	2.15294	1.78792	0.017912	0.000320253	0.0512405	0.122001	0.000203924	69.7977	Fine-Southeastern	0.203924	0.0114057
191	Southeastern	Midwinter_I	S4	Fine	0.867137	1907.6	50.1445	-25.8598	7.46466	9.9877	14		2.89783	1.05753	0.69251	0.0647289	0.000448254	0.278914	0.66408	6.00502e-05	331.763	Fine-Southeastern	0.0600502	0.00867137
192	Southeastern	Midwinter_I	S5	Fine	0.7408	3242.09	35.8947	-26.7698	5.34725	4.96975	7		0.714891	1.53545	1.17043	0.0396124	0.000463635	0.144242	0.343434	8.67054e-05	237.655	Fine-Southeastern	0.0867054	0.007408
193	Southeastern	Midwinter_I	S6	Fine	0.799586	4666.67	42.0047	-27.8138	6.0493	2.87257	5.9		5.77402	2.04056	1.67554	0.0483694	0.000810449	0.212518	0.505994	0.000133974	268.858	Fine-Southeastern	0.133974	0.00799586
194	Southeastern	Midwinter_I	S7	Fine	0.873408	2387.79	50.3021	-27.8688	11.0852	6.17701	1.125		7.04121	1.23003	0.865015	0.0968192	0.0008375	0.041875	0.0997024	7.55511e-05	492.677	Fine-Southeastern	0.0755511	0.00873408
195	Southeastern	Midwinter_I	S8	Fine	0.709106	7151.98	50.8587	-27.6318	9.28248	5.67299	1.4		0.860286	2.90948	2.54446	0.0658226	0.00167483	0.104212	0.248123	0.000180429	412.554	Fine-Southeastern	0.180429	0.00709106
196	Southern	Midwinter_I	F1	Fine					0.615934	0.821587	5.35		0.20562								27.3748	Fine-Southern
197	Southern	Midwinter_I	F2	Fine					0.141961	0.131828	4		2.23408								6.30937	Fine-Southern
198	Southern	Midwinter_I	F3	Fine	0.536778	10708.8	47.6594	-25.9638	0.562933	1.25316	5.3		1.47285	4.12653	3.76151	0.0030217	0.000113662	0.0267736	0.0637468	0.00020191	25.0192	Fine-Southern	0.20191	0.00536778
199	Southern	Midwinter_I	F4	Fine	0.543946	6540.02	50.6369	-27.4288	1.01884	0.904825	2.35		17.9725	2.69696	2.33194	0.00554193	0.000129234	0.0134978	0.0321377	0.000126845	45.2816	Fine-Southern	0.126845	0.00543946
200	Southern	Midwinter_I	F5	Fine	0.314302	4192.67	57.7944	-26.4058	0.793313	2.73148	2.725		2.11313	1.87307	1.50805	0.0024934	3.76018e-05	0.004554	0.0108429	4.73985e-05	35.2583	Fine-Southern	0.0473985	0.00314302
201	Southern	Midwinter_I	F6	Fine	0.535562	2475.03	59.1252	-26.8058	0.845882	1.03842	3.65		3.44211	1.26131	0.896291	0.00453022	4.0604e-05	0.00658687	0.015683	4.8002e-05	37.5948	Fine-Southern	0.048002	0.00535562
202	Southern	Midwinter_I	F7	Fine	0.412273	6597.67	52.1423	-26.3468	2.63802	2.63802	2.90833		0.379735	2.71702	2.352	0.0108758	0.000255799	0.0330644	0.0787249	9.69666e-05	117.245	Fine-Southern	0.0969666	0.00412273
203	Southern	Midwinter_I	F8	Fine	0.429779	4398.47	54.3123	-26.8868	3.04326	3.18581	7.3		2.97795	1.94586	1.58084	0.0130793	0.000206763	0.0670831	0.159722	6.79413e-05	135.256	Fine-Southern	0.0679413	0.00429779
204	Northern	Midwinter_II	Y1	Fine	1.15346	1213.23	56.1214	-28.4858	1.63908	2.14045	4.975		2.35043	0.807018	0.441999	0.0189061	8.35649e-05	0.0184771	0.0439931	5.09827e-05	72.8481	Fine-Northern	0.0509827	0.0115346
205	Northern	Midwinter_II	Y2	Fine	0.845485	5408.24	45.4361	-29.0178	0.95086	0.871122	2.725		2.86405	2.30145	1.93643	0.00803938	0.000155677	0.0188543	0.0448911	0.000163723	42.2604	Fine-Northern	0.163723	0.00845485
206	Northern	Midwinter_II	Y3	Fine	1.15781	1757.26	50.4644	-29.0958	2.70067	2.43222	5.25		0.578519	1.0034	0.638379	0.0312686	0.000199612	0.0465762	0.110896	7.39122e-05	120.03	Fine-Northern	0.0739122	0.0115781
207	Northern	Midwinter_II	Y4	Fine	1.39764	4720.09	62.3115	-28.4208	0.51027	0.556853	5.85		0.675103	2.0594	1.69438	0.00713173	0.000120839	0.0314181	0.0748049	0.000236813	22.6787	Fine-Northern	0.236813	0.0139764
208	Northern	Midwinter_II	Y5	Fine	0.85685	1698.96	51.4625	-28.9208	1.40125	1.24474	7.275		1.49087	0.982393	0.617374	0.0120066	7.41256e-05	0.0239673	0.0570649	5.28997e-05	62.2777	Fine-Northern	0.0528997	0.0085685
209	Northern	Midwinter_II	T1	Fine	0.932328	1156.01	49.2571	-28.4068	1.34314	1.45827	4.475		5.93402	0.786317	0.421298	0.0125225	5.27569e-05	0.0104928	0.0249828	3.92788e-05	59.6952	Fine-Northern	0.0392788	0.00932328
210	Northern	Midwinter_II	T2	Fine	0.959729	396.679	43.5151	-29.1798	0.834261	2.16037	2.725		0.681313	0.510797	0.145778	0.00800664	1.16719e-05	0.0014136	0.00336571	1.39907e-05	37.0783	Fine-Northern	0.0139907	0.00959729
211	Northern	Midwinter_II	T3	Fine	0.868333	706.225	49.5435	-27.7968	0.603273	0.57242	4.25		1.13618	0.623299	0.25828	0.00523842	1.35298e-05	0.00255563	0.00608483	2.24273e-05	26.8121	Fine-Northern	0.0224273	0.00868333
212	Northern	Midwinter_II	T4	Fine	1.18178	352.09	47.0323	-28.7418	1.13913	1.04765	4.775		2.15731	0.49457	0.129551	0.013462	1.74402e-05	0.0037012	0.00881239	1.53101e-05	50.6281	Fine-Northern	0.0153101	0.0118178
213	Northern	Midwinter_II	T5	Fine	0.570123	3567.65	45.5647	-28.3938	1.9012	1.80705	4.65		3.53129	1.65134	1.28632	0.0108392	0.000139427	0.0288149	0.0686069	7.33363e-05	84.4977	Fine-Northern	0.0733363	0.00570123
214	Eastern	Midwinter_II	K1	Fine	1.30309	22222	46.3394	-28.5548	2.36235	2.56502	4.425		1.95084	7.865	7.49998	0.0307836	0.00230877	0.454057	1.08109	0.000977317	104.993	Fine-Eastern	0.977317	0.0130309
215	Eastern	Midwinter_II	K2	Fine	1.19468	9685.59	45.0769	-28.8648	1.82282	2.23979	4.9		2.01811	3.77956	3.41454	0.0217769	0.000743583	0.161936	0.385562	0.00040793	81.0143	Fine-Eastern	0.40793	0.0119468
216	Eastern	Midwinter_II	K3	Fine	0.948722	5450.06	60.6041	-28.8088	2.95306	3.01941	6.025		0.648055	2.31613	1.95111	0.0280163	0.000546628	0.146375	0.348512	0.000185106	131.247	Fine-Eastern	0.185106	0.00948722
217	Eastern	Midwinter_II	K4	Fine					0.957614	1.15524	6.2		3.46071								42.5606	Fine-Eastern
218	Eastern	Midwinter_II	K5	Fine	0.707759	4690.51	50.8838	-27.0108	2.08916	5.31951	6.025		2.19769	2.04897	1.68395	0.0147862	0.000248993	0.0666749	0.15875	0.000119183	92.8517	Fine-Eastern	0.119183	0.00707759
219	Eastern	Midwinter_II	K6	Fine	1.2472	1279.37	47.9695	-26.1108	2.55143	2.86503	6.925		1.8511	0.830933	0.465914	0.0318215	0.000148261	0.0456313	0.108646	5.81089e-05	113.397	Fine-Eastern	0.0581089	0.012472
220	Eastern	Midwinter_II	K7	Fine	0.743292	2820.87	49.541	-28.2128	3.64221	2.97289	5.675		1.56043	1.3851	1.02008	0.0270722	0.000276158	0.0696532	0.165841	7.58217e-05	161.876	Fine-Eastern	0.0758217	0.00743292
221	Eastern	Midwinter_II	K8	Fine	1.04784	4466.24	47.2823	-28.9528	2.41455	3.07655	5.95		1.79876	1.96981	1.60479	0.0253007	0.000406023	0.10737	0.255644	0.000168157	107.313	Fine-Eastern	0.168157	0.0104784
222	Southeastern	Midwinter_II	S1	Fine	0.611373	3980.69	47.8707	-26.3578	1.43878	1.7106	6.25		2.07265	1.79798	1.43296	0.00879633	0.000126048	0.0350133	0.0833651	8.76075e-05	63.9459	Fine-Southeastern	0.0876075	0.00611373
223	Southeastern	Midwinter_II	S2	Fine	1.05606	12591.4	45.2679	-28.4388	1.4365	1.54072	2.775		1.02284	4.75845	4.39343	0.0151703	0.000666497	0.0822014	0.195718	0.000463974	63.8443	Fine-Southeastern	0.463974	0.0105606
224	Southeastern	Midwinter_II	S3	Fine	1.18467	3610.67	47.0585	-28.7438	1.54276	1.33707	3.6		0.738468	1.66664	1.30162	0.0182767	0.000237893	0.0380629	0.0906258	0.000154199	68.5673	Fine-Southeastern	0.154199	0.0118467
225	Southeastern	Midwinter_II	S4	Fine	0.617146	3155.9	51.7168	-26.1448	5.85198	5.75917	14		1.67982	1.50472	1.1397	0.0361153	0.000411606	0.256111	0.609787	7.03363e-05	260.088	Fine-Southeastern	0.0703363	0.00617146
226	Southeastern	Midwinter_II	S5	Fine	0.969867	791.392	47.2229	-27.1178	2.8565	2.88087	7		1.11807	0.654208	0.289189	0.0277042	8.01175e-05	0.0249255	0.0593463	2.80475e-05	126.955	Fine-Southeastern	0.0280475	0.00969867
227	Southeastern	Midwinter_II	S6	Fine	1.04709	3183.47	46.5222	-28.4338	3.59825	4.49264	5.9		4.24004	1.51455	1.14953	0.0376769	0.000433109	0.113571	0.270407	0.000120367	159.922	Fine-Southeastern	0.120367	0.0104709
228	Southeastern	Midwinter_II	S7	Fine	1.10746	2051.04	48.5946	-27.7088	1.58144	4.53597	1.125		2.53948	1.10912	0.744103	0.0175138	0.000130321	0.00651605	0.0155144	8.24063e-05	70.2864	Fine-Southeastern	0.0824063	0.0110746
229	Southeastern	Midwinter_II	S8	Fine	0.65349	2424.91	47.6669	-27.9218	1.04271	2.04602	1.4		0.233878	1.24334	0.878325	0.00681402	5.98493e-05	0.00372396	0.00886656	5.73976e-05	46.3428	Fine-Southeastern	0.0573976	0.0065349
230	Southern	Midwinter_II	F1	Fine					0.176818	0.223357	5.35		1.40196								7.85857	Fine-Southern
231	Southern	Midwinter_II	F2	Fine	0.35823	999.105	47.154	-28.1348	1.13566	0.898829	4		0.664516	0.72951	0.364491	0.00406825	1.48284e-05	0.00263616	0.00627658	1.30571e-05	50.4736	Fine-Southern	0.0130571	0.0035823
232	Southern	Midwinter_II	F3	Fine					0.359184	0.372747	5.3		1.20286								15.9638	Fine-Southern
233	Southern	Midwinter_II	F4	Fine	0.703272	3311.42	46.6488	-27.9408	0.674707	0.738962	2.35		12.0666	1.56015	1.19513	0.00474503	5.67093e-05	0.00592297	0.0141023	8.40502e-05	29.987	Fine-Southern	0.0840502	0.00703272
234	Southern	Midwinter_II	F5	Fine	0.324057	11653.4	54.0765	-26.0478	1.1326	1.83389	2.725		2.17576	4.44465	4.07963	0.00367028	0.000149734	0.0181344	0.0431772	0.000132204	50.3378	Fine-Southern	0.132204	0.00324057
235	Southern	Midwinter_II	F6	Fine	0.46255	448.707	51.0593	-26.8248	1.30757	1.06919	3.65		1.85204	0.529724	0.164705	0.00604816	9.9616e-06	0.00161599	0.0038476	7.61841e-06	58.1142	Fine-Southern	0.00761841	0.0046255
236	Southern	Midwinter_II	F7	Fine	0.511068	6329.67	49.2742	-26.6458	1.4757	1.4194	2.90833		0.21948	2.62369	2.25867	0.00754182	0.000170345	0.0220187	0.0524255	0.000115434	65.5865	Fine-Southern	0.115434	0.00511068
237	Southern	Midwinter_II	F8	Fine	0.591951	4312.97	51.7394	-26.9498	2.5067	1.84134	7.3		1.80481	1.91563	1.55061	0.0148384	0.000230086	0.0746503	0.177739	9.17887e-05	111.409	Fine-Southern	0.0917887	0.00591951
238	Northern	Late_Winter_C	Y1	Fine	1.06627	11777.8	46.1516	-28.951	0.871967	1.29724	4.975		5.373	4.48638	4.12136	0.00929756	0.000383186	0.0847267	0.20173	0.00043945	38.7541	Fine-Northern	0.43945	0.0106627
239	Northern	Late_Winter_C	Y2	Fine	1.06027	4622.97	46.4287	-28.02	0.98088	1.99135	2.725		2.03394	2.02515	1.66013	0.0103999	0.000172652	0.0209101	0.049786	0.000176018	43.5947	Fine-Northern	0.176018	0.0106027
240	Northern	Late_Winter_C	Y3	Fine	1.15244	1737.71	43.9989	-28.455	0.96254	1.72727	5.25		0.516117	0.996357	0.631338	0.0110927	7.00324e-05	0.0163409	0.0389069	7.2758e-05	42.7795	Fine-Northern	0.072758	0.0115244
241	Northern	Late_Winter_C	Y4	Fine	0.679743	4016.86	46.4986	-28.862	1.95066	0.496788	5.85		0.708965	1.8108	1.44578	0.0132595	0.000191703	0.0498429	0.118674	9.82761e-05	86.6961	Fine-Northern	0.0982761	0.00679743
242	Northern	Late_Winter_C	Y5	Fine	0.914254	1564.34	46.1976	-28.511	2.66655	1.30717	7.275		1.12293	0.933849	0.56883	0.024379	0.000138675	0.0448383	0.106758	5.20055e-05	118.513	Fine-Northern	0.0520055	0.00914254
243	Northern	Late_Winter_WW	T1	Fine	1.04075	5867.12	44.9597	-29.14	0.571405	1.09838	4.475		1.43692	2.4622	2.09718	0.00594691	0.000124717	0.0248049	0.0590593	0.000218265	25.3958	Fine-Northern	0.218265	0.0104075
244	Northern	Late_Winter_WW	T2	Fine	0.639112	3013.06	41.8304	-28.022	0.880696	0.523131	2.725		0.41505	1.45376	1.08874	0.00562864	6.12811e-05	0.00742182	0.017671	6.95825e-05	39.1421	Fine-Northern	0.0695825	0.00639112
245	Northern	Late_Winter_WW	T3	Fine					0.435862	0.348713	4.25		1.01153								19.3716	Fine-Northern
246	Northern	Late_Winter_WW	T4	Fine	0.978382	5368.97	47.4606	-28.388	1.13572	0.932712	4.775		4.34785	2.28767	1.92265	0.0111116	0.000213638	0.0453388	0.10795	0.000188109	50.4763	Fine-Northern	0.188109	0.00978382
247	Northern	Late_Winter_WW	T5	Fine	0.830193	2263.14	50.7585	-28.396	2.22174	3.64194	4.65		1.65923	1.18531	0.820295	0.0184447	0.000151301	0.0312689	0.0744498	6.81003e-05	98.7441	Fine-Northern	0.0681003	0.00830193
248	Eastern	Late_Winter_C	K1	Fine	1.14543	40023.1	43.4096	-28.352	1.17155	1.20521	4.425		1.62894	13.104	12.739	0.0134193	0.00170948	0.336198	0.800471	0.00145916	52.0691	Fine-Eastern	1.45916	0.0114543
249	Eastern	Late_Winter_C	K2	Fine	0.707425	3645.04	50.633	-27.583	2.12282	1.87021	4.9		3.63488	1.67885	1.31383	0.0150174	0.000197303	0.0429682	0.102305	9.29437e-05	94.3476	Fine-Eastern	0.0929437	0.00707425
250	Eastern	Late_Winter_C	K3	Fine	1.48003	1867.63	50.3141	-25.743	2.97272	5.43836	6.025		3.34805	1.04314	0.678124	0.043997	0.000298355	0.0798927	0.190221	0.000100364	132.121	Fine-Eastern	0.100364	0.0148003
251	Eastern	Late_Winter_C	K4	Fine	0.73384	1249	49.4871	-28.576	5.04446	5.96835	6.2		1.92117	0.819952	0.454933	0.0370183	0.000168408	0.0464059	0.11049	3.33848e-05	224.198	Fine-Eastern	0.0333848	0.0073384
252	Eastern	Late_Winter_WW	K5	Fine	0.906692	41020.6	34.0367	-28.479	2.9183	2.95306	6.025		0.574419	13.38	13.015	0.02646	0.00344375	0.922161	2.19562	0.00118006	129.702	Fine-Eastern	1.18006	0.00906692
253	Eastern	Late_Winter_WW	K6	Fine	0.665517	5953.7	44.7126	-27.851	2.23241	0.748844	6.925		0.630699	2.49247	2.12745	0.0148571	0.000316077	0.0972815	0.231623	0.000141585	99.2184	Fine-Eastern	0.141585	0.00665517
254	Eastern	Late_Winter_WW	K7	Fine	0.736916	13349.8	44.5974	-27.364	1.73645	1.01291	5.675		1.25948	5.01067	4.64565	0.0127962	0.000594465	0.149937	0.356994	0.000342346	77.1754	Fine-Eastern	0.342346	0.00736916
255	Eastern	Late_Winter_WW	K8	Fine	1.03848	4195.86	49.6508	-29.021	2.8543	2.48319	5.95		2.27309	1.8742	1.50918	0.0296415	0.000447344	0.118298	0.281661	0.000156726	126.858	Fine-Eastern	0.156726	0.0103848
256	Southeastern	Late_Winter_C	S1	Fine	0.629984	7590.27	47.4944	-26	0.785841	2.16168	6.25		0.972326	3.06112	2.6961	0.00495067	0.000133475	0.0370764	0.088277	0.00016985	34.9262	Fine-Southeastern	0.16985	0.00629984
257	Southeastern	Late_Winter_C	S2	Fine					0.489378	0.722787	2.775		1.54665								21.7501	Fine-Southeastern
258	Southeastern	Late_Winter_C	S3	Fine	1.04227	3220.36	46.4244	-27.131	1.77351	2.0218	3.6		0.601908	1.5277	1.16269	0.0184848	0.00021492	0.0343873	0.0818744	0.000121183	78.8228	Fine-Southeastern	0.121183	0.0104227
259	Southeastern	Late_Winter_C	S4	Fine	0.867035	5018.81	43.7612	-28.062	2.84133	4.69416	14		1.88007	2.16462	1.7996	0.0246354	0.000443339	0.275855	0.656799	0.000156032	126.281	Fine-Southeastern	0.156032	0.00867035
260	Southeastern	Late_Winter_WW	S5	Fine	0.929171	25999.8	44.8714	-28.243	3.15148	3.22431	7		0.399303	9.02898	8.66397	0.0292826	0.00253704	0.789301	1.87929	0.000805031	140.066	Fine-Southeastern	0.805031	0.00929171
261	Southeastern	Late_Winter_WW	S6	Fine	1.3016	3994.78	45.3142	-27.413	2.51195	1.60448	5.9		2.21626	1.80298	1.43796	0.0326954	0.000470145	0.123283	0.29353	0.000187164	111.642	Fine-Southeastern	0.187164	0.013016
262	Southeastern	Late_Winter_WW	S7	Fine	0.937996	3070.14	50.0909	-28.474	0.467811	2.37094	1.125		3.74807	1.47413	1.10911	0.00438805	4.86682e-05	0.00243341	0.00579383	0.000104034	20.7916	Fine-Southeastern	0.104034	0.00937996
263	Southeastern	Late_Winter_WW	S8	Fine	0.828219	2674.91	49.6848	-27.22	0.874596	3.01976	1.4		0.325822	1.33289	0.967873	0.00724357	7.01086e-05	0.00436231	0.0103865	8.01611e-05	38.8709	Fine-Southeastern	0.0801611	0.00828219
264	Southern	Late_Winter_C	F1	Fine					0.26373	0.311166	5.35		1.31445								11.7213	Fine-Southern
265	Southern	Late_Winter_C	F2	Fine					0.586742	0.842725	4		1.07792								26.0774	Fine-Southern
266	Southern	Late_Winter_C	F3	Fine					0.594964	0.604635	5.3		1.0821								26.4429	Fine-Southern
267	Southern	Late_Winter_C	F4	Fine	0.534565	6701.44	47.1939	-26.89	0.439265	0.664773	2.35		0.54741	2.75311	2.38809	0.00234816	5.60761e-05	0.00585684	0.0139449	0.000127659	19.5229	Fine-Southern	0.127659	0.00534565
268	Southern	Late_Winter_WW	F5	Fine	0.558591	1626.26	46.8281	-27.321	0.216641	0.0831961	2.725		0.70461	0.956182	0.591163	0.00121013	7.15386e-06	0.000866412	0.00206289	3.30218e-05	9.62847	Fine-Southern	0.0330218	0.00558591
269	Southern	Late_Winter_WW	F6	Fine	0.564266	12340.4	44.0694	-28.057	0.682186	0.346254	3.65		13.1699	4.6747	4.30968	0.00384935	0.000165895	0.0269118	0.0640757	0.000243181	30.3194	Fine-Southern	0.243181	0.00564266
270	Southern	Late_Winter_WW	F7	Fine	0.320664	705.213	50.651	-26.234	7.3673	10.0934	2.90833		0.508437	0.622931	0.257912	0.0236243	6.09299e-05	0.00787575	0.0187518	8.27032e-06	327.435	Fine-Southern	0.00827032	0.00320664
271	Southern	Late_Winter_WW	F8	Fine	0.499283	3815.03	45.1794	-26.641	2.82933	4.26557	7.3		0.508437	1.73922	1.3742	0.0141264	0.000194125	0.0629828	0.149959	6.86116e-05	125.748	Fine-Southern	0.0686116	0.00499283
